# Supplementary material for: Recombination-driven generation of the largest pathogen repository of antigen variants in the protozoan Trypanosoma cruzi
Source: BMC Genomics. 2016 Sep 13;17(1):729. doi: 10.1186/s12864-016-3037-z (PMC5020489; doi:10.1186/s12864-016-3037-z)
Supplement: Additional file 7: Table S3. — Alignment and Analysis of TcTS Architectures. (a) Of the 3209 TcTS sequences in this study, 3176 contained at least 1 motif with an e-value of 1e-01 as determined by the described MEME analysis. The architectures, the in-order sequence of motifs, of each TcTS sequence were extracted and aligned as described. (b) Confidence heat map. Top row contains the motif numbers of the “model” TcTS architecture, where the model is determined by choosing the motif that is most frequent over all TcTS at each position. The cells are colored red if the model motif at that position is found in >1000 sequences, black for motifs preceding the signal peptide sequence or in the hyper-variable region containing SAPA repeats, and blue otherwise. The 2nd row displays a bar-graph of the minimum smoothed entropy for the motif region. The remainder of the table is color-coded according to the “confidence score” of the motif-to-architecture for each cell. The confidence score is calculated as: (-1 * loge(MEME e-value))1.5 and the colors range from white (low) to blue (mid) to red (high). Note that the score reflects the assigned motif at each position regardless of whether it matches the model. (XLSX 1439 kb) [file 12864_2016_3037_MOESM7_ESM.xlsx]

## Sheet: Aligned TcTS Architectures
MOTIFS	ENZYME ACTIVE	TOTAL	SAME	DIFF	66	53	45	85	71	81	67	2	1	28-95	87-60-30	10	42-32-39-72-54	88-56-86-23-96-79	74-41	16	90-70	29	35	8	22-83-68-47	18	11	6-37	49-55	78-14	50-36	7	26-44	27-84	77	9	40-82	15	5	46-19	3	38-89-31	20	61-62	17	93-21	34-12	4	80-43-48
MODEL					66	53	45	85	71	81	67	2	1	28	30	10	32	23	41	16	70	29	35	8	22	18	11	6	55	14	36	7	26	27	77	9	40	15	5	19	3	31	20	61	17	21	12	4	48
MODEL SEQUENCE												ICMLSRVAAV KAPRTHNRRRVTGSSGRRR EGRESEPQRP	RRRGGRESEP QRPNMSRHVFTSAVLLLLV IMMCCGSGAV	SAVLLLLVVM MMCCGTCGAA AAGGNNGKSD	KNDLINIQNL QRVDLFVPQKTLVQPKDGIVP GTTRDLFVSP	DVKKEETVGS LRVPSLVEVNGDVFAVAEA QCTKGDSVCD	AKGTKKEEGG FTGIASELLTLTGQNPKEE LDKTKLKTQV	DLGAQLSKTI SSDVVAGYIDSAWDWSTLV GEVDKGTWRA	TLVGEVGNET WRAHTVLGKAEGKERLDVV HHPTTTTKGN	SPNSKVDVSR PTTIVKGNDIYMLV GKYNRDDAQE	TLVGEVGNET WRAHTVLGKAEGKERLDVV HHPTTTTKGN	AVGQDGGSDD WGLLLVKGEVSNEESNKQ VDWKDTNAVP	EPSGGEPSER IKWGDPKPLPKRISSASHE GNLTDYIASG	QPKKYVTVPF GGGGSGVKMEDGTLVFPME GKKKKVSDTE	LMAMSEAENV YSMIIYSTDNGSTWALSEG MSPAKCTDPA	ATDGGNLSKG MSDDGCSDPSVVEW EKDKLMMMTA	PSVVEWREGK LMMMTACDDGRRRV YESGDKGGSW	NGQRVYESRG MGTTWTEAIGTLSRVWG NARSGVSQKE	EPSGGEPSER IKWGDPKPLPKRISSASHE GNLTDYIASG	LYKIFRVGAL ITATIEGRKVMLYTQ RGYTSGEKEA	LVTLPVYSKE KEKEENGKGRLHLW LTDNTHIADI	DNGKSELHLW LTDNTHIFDIGPVSDDDA AASSLLYKSA	PVAVEEAVKW EFASTLLYSDGNLHLLQRR DNNKGGVISL	QYRSDGSSEA NNNEELIALYEKKK GAEGKPSPGV	ALYEKKGDEG KPSPGMVSVR LSEQLKRMKE	EESLGMVSVL LTEQLQRVKEVLKTWKEVD ERVCQLCANS	EVLATWKEVD ERVSQLCPSESAEKAPSPD TAFKNTKITD	PTKGMCNGPV PTDGLVGFLSGNFS ENTWRDEYLC	GFLSGNFSEN TWRDEYLCVNATVK NGERRVPNGW	EGSASTEKGV TFTGRGAWAEWPVG KQEENQLYHF	AEWPVGRQGQ NQPYHFANYNFTLVATVSI HGEPKSGSVP	ATVSIDGVPE GDTPIPLMGVKMND SGKTVLLGLS	GVRMNDTSST VLFGLSYTHDKKW KFTLPNGASE	ELSYDSGKKW QLLCGDETNKEHSS TWKRGRTHQV	NGETTKSGST WEPGKEYQVAIMLQ EDNKGSVYVD	AHQVAIVLQN GNQGSVYVDGQRVG GXNEPCAFGN	VGEDVPCALG NTDSKEISHFYIGGDGKSA VSTGNGEDVS	CGEENPSQES HVTVTNVFLYNRPLNSTEM RAIKDRVPVP
TcTS MOTIFS / RESIDUES												Signal Peptide				FRIP, Arg53, Asp59		Asp box: SxDxGxTW		Val95, Asp96, Tyr113		Tyr119, Tryp120		Ala179	Asp box: SxDxGxTW	Glu230	Arg245	Asp box: SxDxGxTW		Pro283	Trp312, Arg314		Tyr342 / His342															VTVxNVxLYNR
# MATCH MODEL					248	242	198	102	101	74	185	1389	1394	1177	613	1513	625	625	580	1410	275	1377	1296	1388	793	1442	1480	1255	555	1161	863	1487	679	715	528	1488	567	1504	1510	915	1477	868	1474	511	1425	1175	1185	1474	590
# TOTAL MOTIFS AT POSITION					248	242	198	102	101	74	185	1389	1394	1191	1268	1513	1053	1393	876	1410	442	1377	1296	1388	1427	1442	1480	1519	1050	1517	1403	1487	1297	1175	528	1488	783	1504	1510	1427	1477	1466	1474	1003	1425	1441	1497	1474	1000
% MATCH MODEL					0.0780856	0.0761965	0.0623426	0.0321159	0.031801	0.0232997	0.0582494	0.437343	0.438917	0.370592	0.19301	0.476385	0.196788	0.196788	0.18262	0.443955	0.0865869	0.433564	0.40806	0.437028	0.249685	0.45403	0.465995	0.395151	0.174748	0.365554	0.271725	0.468199	0.213791	0.225126	0.166247	0.468514	0.178526	0.473552	0.475441	0.288098	0.46505	0.2733	0.464106	0.160894	0.448678	0.369962	0.373111	0.464106	0.185768
% FULL LENGTH MATCH MODEL					0.00667302	0.00476644	0.00667302	0.00667302	0.00571973	0.000953289	0.0266921	0.836988	0.833174	0.714967	0.366063	0.885605	0.414681	0.379409	0.317445	0.86082	0.134414	0.845567	0.810296	0.874166	0.488084	0.909438	0.922784	0.808389	0.337464	0.705434	0.580553	0.968541	0.425167	0.496663	0.382269	0.961868	0.406101	0.970448	0.968541	0.612011	0.968541	0.588179	0.946616	0.376549	0.910391	0.757865	0.763584	0.93041	0.408008
TcCLB.511183.400		43	38	5								2	1	28	60	10	32	56	74	16		29	35	8	22	18	11	6	49	14	36	7	44	27	77	9	40	15	5	19	3	31	20	61	17	21	12	4	48
TcCLB.510197.180		43	38	5								2	1	28	60	10	32	56	74	16		29	35	8	22	18	11	6	49	14	36	7	44	27	77	9	40	15	5	19	3	31	20	61	17	21	12	4	48
TcCLB.510197.130		43	38	5								2	1	28	60	10	32	56	74	16		29	35	8	22	18	11	6	49	14	36	7	44	27	77	9	40	15	5	19	3	31	20	61	17	21	12	4	48
TcCLB.510201.10		43	38	5								2	1	28	60	10	32	56	74	16		29	35	8	22	18	11	6	49	14	36	7	44	27	77	9	40	15	5	19	3	31	20	61	17	21	12	4	48
TcCLB.510361.80		43	37	6								2	1	28	60	10	32	56		16	90	29	35	8	22	18	11	6	49	78	36	7	44	27	77	9	40	15	5	19	3	31	20	61	17	21	12	4	48
TcCLB.510279.110		43	37	6								2	1	28	60	10	32	56		16	90	29	35	8	47	18	11	6	49	14	36	7	44	27	77	9	40	15	5	19	3	31	20	61	17	21	12	4	48
TcCLB.506613.40		43	37	6								2	1	28	60	10	32	56	74	16		29	35	8	22	18	11	6	49	78	36	7	44	27	77	9	40	15	5	19	3	31	20	61	17	21	12	4	48
TcCLB.508163.250		43	37	6								2	1	28	60	10	32	56	74	16		29	35	8	47	18	11	6	49	14	36	7	44	27	77	9	40	15	5	19	3	31	20	61	17	21	12	4	48
TcCLB.510191.100040		43	37	6								2	1	28	60	10	32	56	74	16		29	35	8	22	18	11	6	49	78	36	7	44	27	77	9	40	15	5	19	3	31	20	61	17	21	12	4	48
TcCLB.508293.60		43	36	7								2	1	28	60	10	32	56	74	16		29	35	8	47	18	11	6	49	78	36	7	44	27	77	9	40	15	5	19	3	31	20	61	17	21	12	4	48
TcCLB.510693.120		43	36	7								2	1	28	60	10	32	56	74	16	90	29		8	22	18	11	6	49	78	36	7	44	27	77	9	40	15	5	19	3	31	20	61	17	21	12	4	48
TcCLB.508107.30		43	36	7								2	1	28	60	10	32	56	74	16		29	35	8	47	18	11	6	49	78	36	7	44	27	77	9	40	15	5	19	3	31	20	61	17	21	12	4	48
TcCLB.511149.180		43	36	7								2	1	28	60	10	32	56	74	16		29	35	8	47	18	11	6	49	78	36	7	44	27	77	9	40	15	5	19	3	31	20	61	17	21	12	4	48
TcCLB.510137.10		42	38	4								2	1	28	60	10	32	56		16		29	35	8	22	18	11	6	49	14	36	7	44	27	77	9	40	15	5	19	3	31	20	61	17	21	12	4	48
TcCLB.511451.80		42	37	5								2	1	28	60	10	32	56		16		29	35	8	22	18	11	6	49	78	36	7	44	27	77	9	40	15	5	19	3	31	20	61	17	21	12	4	48
TcCLB.504115.60		42	37	5								2	1	28	60	10	32	56		16		29	35	8	22	18	11	6	49	78	36	7	44	27	77	9	40	15	5	19	3	31	20	61	17	21	12	4	48
TcCLB.506409.170		42	37	5								2	1	28	60	10	32	56		16		29	35	8	22	18	11	6	49	78	36	7	44	27	77	9	40	15	5	19	3	31	20	61	17	21	12	4	48
TcCLB.509525.100		42	37	5								2	1	28	60	10	32	56		16		29	35	8	22	18	11	6	49	78	36	7	44	27	77	9	40	15	5	19	3	31	20	61	17	21	12	4	48
TcCLB.506939.200		42	37	5								2	1	28	60	10	32	56		16		29	35	8	22	18	11	6	49	78	36	7	44	27	77	9	40	15	5	19	3	31	20	61	17	21	12	4	48
TcCLB.507059.50		42	37	5								2	1	28	60	10	32	56		16		29	35	8	22	18	11	6	49	78	36	7	44	27	77	9	40	15	5	19	3	31	20	61	17	21	12	4	48
TcCLB.506279.60		42	37	5								2	1	28	60	10	32	56		16		29	35	8	22	18	11	6	49	78	36	7	44	27	77	9	40	15	5	19	3	31	20	61	17	21	12	4	48
TcCLB.506279.10		42	37	5								2	1	28	60	10	32	56		16		29	35	8	22	18	11	6	49	78	36	7	44	27	77	9	40	15	5	19	3	31	20	61	17	21	12	4	48
TcCLB.506133.190		42	37	5								2	1	28	60	10	32	56		16		29	35	8	22	18	11	6	49	78	36	7	44	27	77	9	40	15	5	19	3	31	20	61	17	21	12	4	48
TcCLB.507071.230		42	37	5								2	1	28	60	10	32	56		16		29	35	8	22	18	11	6	49	78	36	7	44	27	77	9	40	15	5	19	3	31	20	61	17	21	12	4	48
TcCLB.508109.60		42	37	5								2	1	28	60	10	32	56		16		29	35	8	22	18	11	6	49	78	36	7	44	27	77	9	40	15	5	19	3	31	20	61	17	21	12	4	48
TcCLB.510419.20		42	37	5								2	1	28	60	10	32	56	74	16		29	35	8	22	18	11	6		78	36	7	44	27	77	9	40	15	5	19	3	31	20	61	17	21	12	4	48
TcCLB.510715.20		42	37	5								2	1	28	60	10	32	56		16		29	35	8	22	18	11	6	49	78	36	7	44	27	77	9	40	15	5	19	3	31	20	61	17	21	12	4	48
TcCLB.508761.40		42	37	5								2	1	28	60	10	32	56		16		29	35	8	22	18	11	6	49	78	36	7	44	27	77	9	40	15	5	19	3	31	20	61	17	21	12	4	48
TcCLB.511173.160		42	36	6								2	1	28	60	10	32	56		16		29	35	8	22	18	11	6	49	78	36	7	44	27	77	9	40	15	5	19	3	31	20	61	17	21	12	4	043-018
TcCLB.508013.40		42	36	6								2	1	28	60	10	32	56		16		29	35	8	22	18	11	6	49	78	36	7	44	27	77	9	40	15	5	19	3	31	20	61	17	21	12	4	043-018
TcCLB.506973.120		42	36	6						081-089	67	2	1	28	60	10	32	56	74	16		29	35	8	22	18	11	6	49	14	36	7	44	27	77	9	40	15	5	19	3	31	20	61	17	21	12	4	48
TcCLB.511173.80		42	36	6								2	1	28	60	10	32	56		16		29	35	8	47	18	11	6	49	78	36	7	44	27	77	9	40	15	5	19	3	31	20	61	17	21	12	4	48
TcCLB.511173.130		42	36	6								2	1	28	60	10	32	56		16		29	35	8	47	18	11	6	49	78	36	7	44	27	77	9	40	15	5	19	3	31	20	61	17	21	12	4	48
TcCLB.509419.70		42	36	6								2	1	28	60	10	32	56	74	16		29	35	8	22	18	11	6	49	78	36	7	44	27	77	9	40	15	5	19	3	31	20	61	17	21	12	4
TcCLB.511259.1000170		42	36	6								2	1	28	60	10	32	56		16		29	35	8	47	18	11	6	49	78	36	7	44	27	77	9	40	15	5	19	3	31	20	61	17	21	12	4	48
TcCLB.511401.120		42	36	6								2	1	28	60	10	32	56		16		29	35	8	47	18	11	6	49	78	36	7	44	27	77	9	40	15	5	19	3	31	20	61	17	21	12	4	48
TcCLB.508977.120		42	36	6								2	1	28	60	10	32	56		16		29	35	8	47	18	11	6	49	78	36	7	44	27	77	9	40	15	5	19	3	31	20	61	17	21	12	4	48
TcCLB.508977.80		42	36	6								2	1	28	60	10	32	56		16		29	35	8	47	18	11	6	49	78	36	7	44	27	77	9	40	15	5	19	3	31	20	61	17	21	12	4	48
TcCLB.508977.40		42	36	6								2	1	28	60	10	32	56		16		29	35	8	47	18	11	6	49	78	36	7	44	27	77	9	40	15	5	19	3	31	20	61	17	21	12	4	48
TcCLB.509897.70		42	36	6								2	1	28	60	10	32	56		16		29	35	8	47	18	11	6	49	78	36	7	44	27	77	9	40	15	5	19	3	31	20	61	17	21	12	4	48
TcCLB.507059.20		42	36	6								2	1	28	60	10	32	56	74	16		29	35	8	47	18	11	6	49	14	36	7	44	27	77	9	40	15	5	19	3	31	20	61	17	21	12	4	48
TcCLB.508761.200		42	36	6								2	1	28	60	10	32	56		16		29	35	8	47	18	11	6	49	78	36	7	44	27	77	9	40	15	5	19	3	31	20	61	17	21	12	4	48
TcCLB.506939.120		42	36	6								2	1	28	60	10	32	56	74	16		29	35	8	22	18	11	6		78	36	7	44	27	77	9	40	15	5	19	3	31	20	61	17	21	12	4	43
TcCLB.508983.20		42	36	6								2	1	28	60	10	32	56		16		29	35	8	47	18	11	6	49	78	36	7	44	27	77	9	40	15	5	19	3	31	20	61	17	21	12	4	48
TcCLB.510279.230		42	36	6								2	1	28	60	10	32	56	74	16		29	35	8	47	18	11	6		78	36	7	44	27	77	9	40	15	5	19	3	31	20	61	17	21	12	4	48
TcCLB.507069.160		42	36	6								2	1	28	60	10	32	56	74	16		29	35	8	22	18	11	6	49	78	36	7	44	27		9	40	15	5	19	3	31	20	61	17	21	12	4	48
TcCLB.511173.470		42	36	6								2	1	28	60	10	32	56		16		29	35	8	47	18	11	6	49	78	36	7	44	27	77	9	40	15	5	19	3	31	20	61	17	21	12	4	48
TcCLB.507163.70		42	36	6								2	1	28	60	10	32	56		16		29	35	8	47	18	11	6	49	78	36	7	44	27	77	9	40	15	5	19	3	31	20	61	17	21	12	4	48
TcCLB.511401.90		42	36	6								2	1	28	60	10	32	56		16		29	35	8	47	18	11	6	49	78	36	7	44	27	77	9	40	15	5	19	3	31	20	61	17	21	12	4	48
TcCLB.506909.160		42	36	6								2	1	28	60	10	32	56		16		29	35	8	47	18	11	6	49	78	36	7	44	27	77	9	40	15	5	19	3	31	20	61	17	21	12	4	48
TcCLB.508375.20		42	36	6								2	1	28	60	10	32	56		16		29	35	8	47	18	11	6	49	78	36	7	44	27	77	9	40	15	5	19	3	31	20	61	17	21	12	4	48
TcCLB.511401.30		42	36	6								2	1	28	60	10	32	56		16		29	35	8	47	18	11	6	49	78	36	7	44	27	77	9	40	15	5	19	3	31	20	61	17	21	12	4	48
TcCLB.506993.1000160		42	36	6								2	1	28	60	10	32	56		16		29	35	8	47	18	11	6	49	78	36	7	44	27	77	9	40	15	5	19	3	31	20	61	17	21	12	4	48
TcCLB.507091.1000160		42	36	6								2	1	28	60	10	32	56		16		29	35	8	47	18	11	6	49	78	36	7	44	27	77	9	40	15	5	19	3	31	20	61	17	21	12	4	48
TcCLB.507091.60		42	36	6								2	1	28	60	10	32	56		16		29	35	8	47	18	11	6	49	78	36	7	44	27	77	9	40	15	5	19	3	31	20	61	17	21	12	4	48
TcCLB.503609.50		42	36	6								2	1	28	60	10	32	56		16		29	35	8	47	18	11	6	49	78	36	7	44	27	77	9	40	15	5	19	3	31	20	61	17	21	12	4	48
TcCLB.507091.1000100		42	36	6								2	1	28	60	10	32	56		16		29	35	8	47	18	11	6	49	78	36	7	44	27	77	9	40	15	5	19	3	31	20	61	17	21	12	4	48
TcCLB.511921.50		42	36	6								2	1	28	60	10	32	56		16		29	35	8	47	18	11	6	49	78	36	7	44	27	77	9	40	15	5	19	3	31	20	61	17	21	12	4	48
TcCLB.511921.150		42	36	6								2	1	28	60	10	32	56		16		29	35	8	47	18	11	6	49	78	36	7	44	27	77	9	40	15	5	19	3	31	20	61	17	21	12	4	48
TcCLB.507747.130		42	36	6								2	1	28	60	10	32	56		16		29	35	8	47	18	11	6	49	78	36	7	44	27	77	9	40	15	5	19	3	31	20	61	17	21	12	4	48
TcCLB.511843.70		42	36	6								2	1	28	60	10	32	56		16		29	35	8	47	18	11	6	49	78	36	7	44	27	77	9	40	15	5	19	3	31	20	61	17	21	12	4	48
TcCLB.511221.60		42	36	6								2	1	28	60	10	32	56		16		29	35	8	47	18	11	6	49	78	36	7	44	27	77	9	40	15	5	19	3	31	20	61	17	21	12	4	48
TcCLB.510553.40		42	36	6							67	2	1	28	60	10	32	56		16		29	35	8	47	18	11	6	49	78	36	7	44	27	77	9	40	15	5	19	3	31	20	61	17	21	12	4	48
TcCLB.509867.70		42	35	7								2	1	28	60	10	32	56	74	16		29		8	22	18	11	6	49	78	36	7	44	27	77	9	40	15	5	19	3	31	20	61	17	21	12	4	043-032
TcCLB.506885.480		42	35	7							089-067	2	1	28	60	10	32	56		16		29	35	8	47	18	11	6	49	78	36	7	44	27	77	9	40	15	5	19	3	31	20	61	17	21	12	4	48
TcCLB.510115.30		42	35	7								2	1	28	60	10	32	56	74	16		29		8	47	18	11	6	49	78	36	7	44	27	77	9	40	15	5	19	3	31	20	61	17	21	12	4	48
TcCLB.507071.80		42	35	7								2	1	28	60	10	32	56	74	16		29	35	8	22	18	11	6	49	78	36	7	44	27	77	9	40	15	5	19	3	31	20	61	17	21	12	4	43
TcCLB.507821.10		42	35	7								2	1	28	60	10	32	56	74	16		29		8	47	18	11	6	49	78	36	7	44	27	77	9	40	15	5	19	3	31	20	61	17	21	12	4	48
TcCLB.510279.160		42	35	7								2	1	28	60	10	32	56	74	16		29	35	8	47	18	11	6	49	78	36	7	44	27	77	9	40	15	5	19	3	31	20	61	17	21	12	4	48
TcCLB.508789.120		42	35	7								2	1	28	60	10	32	56		16	90	29	35	8	47	18	11	6	49	78	36	7	44	27	77	9	40	15	5	19	3	31	20	61	17	21	12	4
TcCLB.505699.10		42	34	8	66	053-013	45	85	71	081-028-062	67	2	1	28	30	10		23	41	16	70	29	35	8	22	18	11	6	55	14	50	7	26	84		9		15	5	46	3	38	20		17	21	34	4	43
TcCLB.510697.50		42	34	8								2	1	28	60	10	32	56	74	16		29		8	47	18	11	6	49	78	36	7	44	27	77	9	40	15	5	19	3	31	20	61	17	21	12	4	43
TcCLB.511259.50		41	37	4								2	1	28	60	10	32	56		16		29	35	8	47	18	11	6		14	36	7	44	27	77	9	40	15	5	19	3	31	20	61	17	21	12	4	48
TcCLB.504031.50		41	37	4								2	1	28	60	10	32	56		16		29	35	8	22	18	11	6		78	36	7	44	27	77	9	40	15	5	19	3	31	20	61	17	21	12	4	48
TcCLB.506741.130		41	37	4								2	1	28	60	10	32	56		16		29	35	8	22	18	11	6		78	36	7	44	27	77	9	40	15	5	19	3	31	20	61	17	21	12	4	48
TcCLB.508011.90		41	37	4								2	1	28	60	10	32	56		16		29	35	8	22	18	11	6		78	36	7	44	27	77	9	40	15	5	19	3	31	20	61	17	21	12	4	48
TcCLB.508433.200		41	37	4								2	1	28	60	10	32	56		16		29	35	8	22	18	11	6		78	36	7	44	27	77	9	40	15	5	19	3	31	20	61	17	21	12	4	48
TcCLB.506789.20		41	37	4								2	1	28	60	10	32	56		16		29	35	8	22	18	11	6	49	14	36	7	44	27	77	9	40	15	5	19	3	31	20	61	17	21	12	4
TcCLB.508697.10		41	36	5								2	1	28	60	10	32	56		16		29	35	8	47	18	11	6		78	36	7	44	27	77	9	40	15	5	19	3	31	20	61	17	21	12	4	48
TcCLB.510693.270		41	36	5								2	1	28	60	10	32	56		16		29		8	22	18	11	6	49	78	36	7	44	27	77	9	40	15	5	19	3	31	20	61	17	21	12	4	48
TcCLB.510693.240		41	36	5								2	1	28	60	10	32	56	74	16		29		8	22	18	11	6		78	36	7	44	27	77	9	40	15	5	19	3	31	20	61	17	21	12	4	48
TcCLB.510537.40		41	36	5								2	1	28	60	10	32	56		16		29	35	8	22	18	11	6	49	78	36	7	44	27	77	9	40	15	5	19	3	31	20	61	17	21	12	4
TcCLB.510483.60		41	36	5								2	1	28	60	10	32	56		16		29	35	8	22	18	11	6	49	78	36	7	44	27	77	9	40	15	5	19	3	31	20	61	17	21	12	4	48
TcCLB.503533.30		41	36	5								2	1	28	60	10	32	56		16		29	35	8	22	18	11	6	49	78	36	7	44	27	77	9	40	15	5	19	3	31	20	61	17	21	12	4	48
TcCLB.506067.300		41	36	5								2	1	28	60	10	32	56		16			35	8	22	18	11	6	49	78	36	7	44	27	77	9	40	15	5	19	3	31	20	61	17	21	12	4	48
TcCLB.511919.20		41	36	5								2	1	28	60	10	32	56		16		29	35	8	47	18	11	6		78	36	7	44	27	77	9	40	15	5	19	3	31	20	61	17	21	12	4	48
TcCLB.507633.80		41	36	5								2	1	28	60	10	32	56		16		29	35	8	47	18	11	6		78	36	7	44	27	77	9	40	15	5	19	3	31	20	61	17	21	12	4	48
TcCLB.510487.100070		41	36	5								2	1	28	60	10	32	56		16		29	35	8	22	18	11	6	49	78	36	7	44	27	77	9	40	15	5	19	3	31	20	61	17	21	12	4	48
TcCLB.510085.50		41	36	5								2	1	28	60	10	32	56		16		29	35	8	22	18	11	6	49	78	36	7	44	27	77	9	40	15	5	19	3	31	20	61	17	21	12	4
TcCLB.508761.110		41	36	5								2	1	28	60	10	32	56		16		29	35	8	47	18	11	6		78	36	7	44	27	77	9	40	15	5	19	3	31	20	61	17	21	12	4	48
TcCLB.506133.130		41	36	5								2	1	28	60	10	32	56		16		29		8	22	18	11	6	49	78	36	7	44	27	77	9	40	15	5	19	3	31	20	61	17	21	12	4	48
TcCLB.506703.90		41	36	5								2	1	28	60	10	32	56		16		29	35	8	22	18	11	6		78	36	7	44	27	77	9	40	15	5	19	3	31	20	61	17	21	12	4	43
TcCLB.507411.10		41	36	5								2	1	28	60	10	32	56		16		29	35	8	47	18	11	6		78	36	7	44	27	77	9	40	15	5	19	3	31	20	61	17	21	12	4	48
TcCLB.508097.40		41	36	5								2	1	28	60	10	32	56		16		29	35	8	22	18	11	6	49	78	36	7	44	27	77	9	40	15	5	19	3	31	20		17	21	12	4	48
TcCLB.510933.10		41	36	5								2	1	28	60	10	32	56		16		29	35	8	47	18	11	6	49	14	36	7	44	27	77	9	40	15	5	19	3	31	20	61	17	21	12	4	48
TcCLB.508437.20		41	36	5								2	1	28	60	10	32	56	74	16		29	35	8	47	18	11	6		14	36	7	44	27	77	9	40	15	5	19	3	31	20	61	17	21	12	4	48
TcCLB.506309.130		41	36	5								2	1	28	60	10	32	56		16		29	35	8	22	18	11	6		78	36	7	44	27	77	9	40	15	5	19	3	31	20	61	17	21	12	4	43
TcCLB.503827.100		41	36	5								2	1	28	60	10	32	56	74	16		29	35	8	22	18	11	6		78	36	7	44	27	77	9	40	15	5	19	3	31	20	61	17	21	12	4
TcCLB.511173.230		41	36	5								2	1	28	60	10	32	56		16		29	35	8	22	18	11	6	49	78	36	7	44	27	77	9	40	15	5	19	3	31	20	61	17	21	12	4
TcCLB.508143.90		41	36	5							67	2	1	28	60	10	32	56	74	16		29	35	8	47	18	11	6	49	14	36	7		27	77	9	40	15	5	19	3	31	20	61	17	21	12	4	48
TcCLB.511233.140		41	36	5						81	67	2	1	28	60	10	32	56	74	16		29	35	8	47	18	11	6	49	14	36	7		27	77	9	40	15	5	19	3	31	20	61	17	21	12	4	48
TcCLB.508979.50		41	35	6								2	1	28	60	10	32	56		16		29	35	008-078		18	11	6	49	78	36	7	44	27	77	9	40	15	5	19	3	31	20	61	17	21	12	4	48
TcCLB.511089.80		41	35	6								2	1	28	60	10	32	56	74	16		29	35	8	22	18	11	6	49	78	36	7	44	27	77	9	40	15	5	19	3	31	20	61	17	21	12	4	48
TcCLB.511349.20		41	35	6								2	1	28	60	10	32		74	16		29	35	8	47	18	11	6	49	78	36	7	44	27	77	9	40	15	5	19	3	31	20	61	17	21	12	4	48
TcCLB.511625.130		41	35	6								2	1	28	60	10	32	56	74	16		29	35	8	47	18	11	6	49	14	36	7	44	27	77	9	40	15	5	19	3	31	20	61	17	21	12	4	48
TcCLB.506813.190		41	35	6								2	1	28	60	10	32	56		16		29		8	22	18	11	6	49	78	36	7	44	27	77	9	40	15	5	19	3	31	20	61	17	21	12	4	43
TcCLB.506245.250		41	35	6								2	1	28	60	10	32	56	74	16		29		8	22	18	11	6		78	36	7	44	27	77	9	40	15	5	19	3	31	20	61	17	21	12	4	43
TcCLB.511063.140		41	35	6								2	1	28	60	10	32	56	74	16		29	35	8	22	18	11	6	49	78	36	7	44	27	77	9	40		5	19	3	31	20	61	17	21	12	4	48
TcCLB.507071.390		41	35	6								2	1	28	60	10	32	56	74	16		29		8	22	18	11	6		78	36	7	44	27	77	9	40	15	5	19	3	31	20	61	17	21	12	4	43
TcCLB.504261.20		41	35	6								2	1	28	60	10	32	56		16		29		8	47	18	11	6	49	78	36	7	44	27	77	9	40	15	5	19	3	31	20	61	17	21	12	4	48
TcCLB.504201.30		41	35	6								2	1	28	60	10	32	56	74	16		29	35	8	47	18	11	6	49	14	36	7	44	27	77	9	40	15	5	19	3	31	20	61	17	21	12	4	48
TcCLB.509527.120		41	35	6								2	1	28	60	10	32	56		16		29	35	8	47	18	11	6	49	78	36	7	44	27	77	9	40	15	5	19	3	31	20	61	17	21	12	4	48
TcCLB.508365.190		41	35	6								2	1	28	60	10	32	56		16		29	35	8	47	18	11	6	49	78	36	7	44	27	77	9	40	15	5	19	3	31	20	61	17	21	12	4	48
TcCLB.510715.90		41	35	6								2	1	28	60	10	32	56	74	16		29	35	8	22	18	11	6	49	78	36	7	44	27	77	9	40	15	5	19	3	31	20	61	17	21	12	4	48
TcCLB.510275.350		41	35	6								2	1	28	60	10	32	56	74	16		29	35	8	47	18	11	6	49	14	36	7	44	27	77	9	40	15	5	19	3	31	20	61	17	21	12	4	48
TcCLB.509753.270		41	35	6								2	1	28	60	10	32	56	74	16		29	35	8	47	18	11	6	49	14	36	7	44	27	77	9	40	15	5	19	3	31	20	61	17	21	12	4	48
TcCLB.510465.100		41	35	6								2	1	28	60	10	32	56	74	16		29	35	8	47	18	11	6	49	14	36	7	44	27	77	9	40	15	5	19	3	31	20	61	17	21	12	4	48
TcCLB.453767.20		41	35	6								2	1	28	60	10	32	56		16		29	35	8	47	18	11	6	49	78	36	7	44		77	9	40	15	5	19	3	31	20	61	17	21	12	4	48
TcCLB.503717.10		41	35	6								2	1	28	60	10	32	56	74	16		29	35	8	22	18	11	6	49	78	36	7	44	27	77	9	40	15	5	19	3	31	20	61	17	21	12	4	48
TcCLB.510933.80		41	35	6								2	1	28	60	10	32	56	74	16		29	35	8	47	18	11	6	49	14	36	7	44	27	77	9	40	15	5	19	3	31	20	61	17	21	12	4	48
TcCLB.510275.260		41	35	6								2	1	28	60	10	32	56	74	16		29	35	8	47	18	11	6	49	14	36	7	44	27	77	9	40	15	5	19	3	31	20	61	17	21	12	4	48
TcCLB.509525.20		41	35	6								2	1	28	60	10	32	56		16			35	8	47	18	11	6	49	78	36	7	44	27	77	9	40	15	5	19	3	31	20	61	17	21	12	4	48
TcCLB.511173.370		41	35	6								2	1	28	60	10	32	56		16		29		8	22	18	11	6	49	78	36	7	44	27	77	9	40	15	5	19	3	31	20	61	17	21	12	4	43
TcCLB.504155.20		41	35	6								2	1	28	60	10	32	56	74	16		29	35	8	47	18	11	6	49	14	36	7	44	27	77	9	40	15	5	19	3	31	20	61	17	21	12	4	48
TcCLB.503633.40		41	35	6								2	1	28	60	10	32	56		16		29	35	8	47		11	6	49	78	36	7	44	27	77	9	40	15	5	19	3	31	20	61	17	21	12	4	48
TcCLB.506813.80		41	35	6								2	1	28	60	10	32	56	74	16		29	35	8	22	18	11	6	49	78	36	7	44	27	77	9	40	15	5	19	3	31	20	61	17	21	12	4	48
TcCLB.508455.20		41	35	6								2	1	28	60	10	32	56		16		29	35	8	47	18	11	6	49	78	36	7	44	27	77	9	40	15	5	19	3	31	20	61	17	21	12	4	48
TcCLB.508165.200		41	34	7								2	1	28	60	10	32	56	74	16		29	35	8	47	18	11	6	49	14	36	7	44	27	77	9	40	15	5	19	3	31	20	61	17	21	12	4	48
TcCLB.508221.590		41	34	7							089-067	2	1	28	60	10	32	56	74	16		29	35	8	47	18	11	6		78	36	7	44	27	77	9	40	15	5	19	3	31	20	61	17	21	12	4	48
TcCLB.506955.240		41	34	7							089-067	2	1	28	60	10	32	56		16		29	35	8	47	18	11	6	49	78	36	7	44	27	77	9	40	15	5	19	3	31	20	61	17	21	12	4	48
TcCLB.508221.650		41	34	7							089-067	2	1	28	60	10	32	56		16		29	35	8	47	18	11	6	49	78	36	7	44	27	77	9	40	15	5	19	3	31	20	61	17	21	12	4	48
TcCLB.510715.150		41	34	7								2	1	28	60	10	32	56		16		29		8	47	18	11	6	49	78	36	7	44	27	77	9	40	15	5	19	3	31	20	61	17	21	12	4	43
TcCLB.508293.10		41	34	7								2	1	28	60	10	32	56	74	16		29	35	8	47	18	11	6	49	78	36	7	44	27	77	9	40	15	5	19	3	31	20	61	17	21	12	4	48
TcCLB.510279.320		41	34	7								2	1	28	60	10	32	56	74	16		29	35	8	47	18	11	6	49	78	36	7	44	27	77	9	40	15	5	19	3	31	20	61	17	21	12	4	48
TcCLB.506973.10		41	34	7								2	1	28	60	10	32	56	74	16		29	35	8	47	18	11	6	49	78	36	7	44	27	77	9	40	15	5	19	3	31	20	61	17	21	12	4	48
TcCLB.510503.50		41	34	7								2	1	28	60	10	32	56		16	90	29	35	8	47	18	11	6	49	78	36	7	44	27	77	9	40	15	5	19	3	31	20	61	17	21	12	4	48
TcCLB.506245.100060		41	34	7								2	1	28	60	10	32	56		16		29		8	47	18	11	6	49	78	36	7	44	27	77	9	40	15	5	19	3	31	20	61	17	21	12	4	43
TcCLB.511063.1000100		41	34	7								2	1	28	60	10	32	56	74	16		29	35	8	47	18	11	6	49	78	36	7	44	27	77	9	40	15	5	19	3	31	20	61	17	21	12	4	48
TcCLB.510625.40		41	34	7								2	1	28	60	10	32	56	74	16		29	35	8	47	18	11	6	49	78	36	7	44	27	77	9	40	15	5	19	3	31	20	61	17	21	12	4	48
TcCLB.509755.50		41	33	8								2	1	28	60	10	32	56	74	16		29	35	8	47	18	11	6	49	78	36	7	44	27	77	9	40	15	5	19	3	31	20	61	17	21	12	4	048-064
TcCLB.511839.40		41	33	8						081-089	67	2	1	28	60	10	32	56	74	16		29	35	8	47	18	11	6	49	14	36	7	44	27	77	9	40	15	5	19	3	31	20	61	17	21	12	4	48
TcCLB.509843.100020		41	28	13							020-089-067	2	1	28	87	10	32	88		16	90	29	35	8	68	18	11	37		14	36	7		27		9	82	15	5	19	3	31	20		17	93	12	4	48
TcCLB.506717.80		41	28	13								2	1	28	87	10	32	88		16	90	29	35	8	68	18	11	37		14	36	7	44	27		9	82	15	5	19	3	31	20		17	93	12	4	48
TcCLB.508521.100		41	27	14							089-067	2	1	28	87	10	54	96		16	90	29	35	8	68	18	11	37		14	36	7		27		9	82	15	5	19	3	31	20		17	93	12	4	48
TcCLB.509581.10		41	26	15							089-067	2	1		87	10	54	96		16	90	29	35	8	68	18	11	37		14	36	7	44	27		9	82	15	5	19	3	31	20		17	93	12	4	48
TcCLB.508261.80		40	37	3								2	1	28	60	10	32	56		16		29	35	8	22	18	11	6		14	36	7	44	27	77	9	40	15	5	19	3	31	20	61	17	21	12	4
TcCLB.508873.330		40	36	4								2	1	28	60	10	32	56		16		29	35	8	22	18	11	6	49	14	36	7	44	27	77	9	40	15	5	19	3	31	20	61	17	21	12	4
TcCLB.509665.100030		40	36	4								2	1	28	60	10	32	56		16			35	8	22	18	11	6	49	14	36	7	44	27	77	9	40	15	5	19	3	31		61	17	21	12	4	48
TcCLB.510483.250		40	36	4								2	1	28	60	10	32	56		16		29		8	22	18	11	6		78	36	7	44	27	77	9	40	15	5	19	3	31	20	61	17	21	12	4	48
TcCLB.511449.70		40	36	4								2	1	28	60	10	32	56		16		29	35	8	22	18	11	6		78	36	7	44	27		9	40	15	5	19	3	31	20	61	17	21	12	4	48
TcCLB.511643.110		40	35	5						081-089	67	2	1		60	10	32	56		16		29	35	8	22	18	11	6		78	36	7	44	27	77	9	40	15	5	19	3	31	20	61	17	21	12	4	48
TcCLB.509899.100		40	35	5								2	1	28	60	10	32	56		16		29	35	8	22	18	11	6	49	78	36	7	44	27	77	9	40	15	5	19	3	31	20	61	17	21	12	4	48
TcCLB.510583.1000140		40	35	5								2	1	28		10	32	56	74	16		29	35	8	47	18	11	6	49	14	36	7	44	27	77	9	40	15	5	19	3	31	20		17	21	12	4	48
TcCLB.511923.60		40	35	5								2	1	28	60	10	32	56		16		29	35	8	22	18	11	6	49	78	36	7	44	27	77	9	40	15	5	19	3	31	20	61	17	21	12	4	48
TcCLB.511603.90		40	35	5								2	1	28	60	10	32	56	74	16		29	35	8	47	18	11	6	49	14	36	7		27	77	9	40	15	5	19	3	31	20	61	17	21	12	4	48
TcCLB.507069.1000120		40	35	5								2	1	28	60	10	32	56		16		29	35	8	22	18	11	6	49	78	36	7	44	27	77	9	40	15	5	19	3	31	20	61	17	21	12	4	48
TcCLB.511255.1000110		40	35	5								2	1	28	60	10	32	56		16		29	35	8	47	18	11	6	49	14	36	7	44	27	77	9	40	15	5	19	3	31	20	61	17	21	12	4	48
TcCLB.507523.70		40	35	5								2	1	28	60	10	32	56		16		29	35	8	22	18	11	6	49	78	36	7	44	27	77	9	40	15	5	19	3	31	20	61	17	21	12	4	48
TcCLB.503587.30		40	35	5								2	1	28	60	10	32	56		16		29	35	8	22	18	11	6	49	78	36	7	44	27	77	9	40	15	5	19	3	31	20	61	17	21	12	4	48
TcCLB.470561.20001		40	35	5								2	1	28	60	10	32	56	74	16		29	35	8	22	18	11	6		78	36	7	44	27	77	9	40	15	5	19	3	31	20	61	17	21	12	4	48
TcCLB.506967.60		40	35	5								2	1	28	60	10	32	56	74	16		29		8	22	18	11	6		78	36	7	44	27	77	9	40	15	5	19	3	31	20	61	17	21	12	4
TcCLB.506339.10		40	35	5								2	1	28	60	10	32	56	74	16		29	35	8	47	18	11	6	49	14	36	7		27	77	9	40	15	5	19	3	31	20	61	17	21	12	4	48
TcCLB.510237.80		40	35	5								2	1	28	60	10	32	56	74	16		29	35	8	47	18	11	6	49	14	36	7		27	77	9	40	15	5	19	3	31	20	61	17	21	12	4	48
TcCLB.508221.870		40	35	5								2	1	28	60	10	32	56		16		29	35	8	47	18	11	6	49	14	36	7	44	27	77	9	40	15	5	19	3	31	20	61	17	21	12	4	48
TcCLB.506285.100030		40	35	5								2	1	28	60	10	32	56		16			35	8	47	18	11	6		78	36	7	44	27	77	9	40	15	5	19	3	31	20	61	17	21	12	4	48
TcCLB.511643.70		40	35	5								2	1		60	10	32	56		16		29	35	8	47	18	11	6	49	14	36	7	44	27	77	9	40	15	5	19	3	31	20	61	17	21	12	4	48
TcCLB.511099.100020		40	35	5								2	1	28	60	10	32	56		16		29	35	8	47	18	11	6		78	36	7	44	27	77	9	40	15	5	19	3	31	20	61	17	21	12	4	48
TcCLB.507747.180		40	35	5										28	60	10	32	56		16		29	35	8	22	18	11	6	49	78	36	7	44	27	77	9	40	15	5	19	3	31	20	61	17	21	12	4	48
TcCLB.511173.280		40	35	5								2	1	28	60	10	32	56	74	16		29	35	8	47	18	11	6		14	36	7	44	27	77	9	40	15	5	19	3	31	20	61	17	21	12	4	48
TcCLB.508011.120		40	35	5										28	60	10	32	56		16		29	35	8	22	18	11	6	49	78	36	7	44	27	77	9	40	15	5	19	3	31	20	61	17	21	12	4	48
TcCLB.508305.40		40	34	6								2	1	28	60	10	32	56	74	16		29	35	8	22	18	11	6		78	36	7	44	27	77	9	40	15	5	19	3	31	20	61	17	21	12	4	48
TcCLB.509699.40		40	34	6								2	1	28	60	10	32	56	74	16		29	35	8	47	18	11	6		14	36	7	44	27	77	9	40	15	5	19	3	31	20	61	17	21	12	4	48
TcCLB.506279.140		40	34	6								2	1	28	60	10	32	56		16		29	35	008-078		18	11	6	49	78	36	7	44	27	77	9	40	15	5	19	3	31	20	61	17	21	12	4	48
TcCLB.508853.20		40	34	6							089-067	2	1	28	60	10	32	56	74	16		29	35	8	47	18	11	6		14	36	7	44	27	77	9	40	15	5	19	3	31	20	61	17	21	12	4	48
TcCLB.511923.30		40	34	6								2	1	28	60	10	32	56		16		29	35	8	47	18	11	6	49	78	36	7	44	27	77	9	40	15	5	19	3	31	20	61	17	21	12	4	48
TcCLB.509419.40		40	34	6								2	1	28	60	10	32	56	74	16		29	35	8	47	18	11	6	49	14	36	7	44	27	77	9	40	15	5	19	3	31	20	61	17	21	12	4	48
TcCLB.511255.270		40	34	6								2	1	28	60	10	32	56		16		29	35	8	47	18	11	6	49	78	36	7	44	27	77	9	40	15	5	19	3	31	20	61	17	21	12	4	48
TcCLB.508753.20		40	34	6								2	1	28	60	10	32	56	74	16		29	35	8	47	18	11	6	49	14	36	7	44	27	77	9	40	15	5	19	3	31	20	61	17	21	12	4	48
TcCLB.510979.40		40	34	6								2	1	28	60	10	32	56	74	16		29	35	8	47	18	11	6	49	14	36	7	44	27	77	9	40	15	5	19	3	31	20	61	17	21	12	4	48
TcCLB.506187.20		40	34	6								2	1	28	60	10	32	56		16		29	35	8	47	18	11	6	49	78	36	7	44	27	77	9	40	15	5	19	3	31	20	61	17	21	12	4	48
TcCLB.511399.24		40	34	6								2	1	28	60	10	32	56		16		29	35	8	47	18	11	6	49	78	36	7	44	27	77	9	40	15	5	19	3	31	20	61	17	21	12	4	48
TcCLB.506309.60		40	34	6								2	1	28	60	10	32	56	74	16		29	35	8	47	18	11	6	49	14	36	7	44	27	77	9	40	15	5	19	3	31	20	61	17	21	12	4	48
TcCLB.505949.100		40	34	6								2	1	28	60	10	32	56		16		29	35	8	47	18	11	6	49	78	36	7	44	27	77	9	40	15	5	19	3	31	20	61	17	21	12	4	48
TcCLB.509251.80		40	34	6								2	1	28	60	10	32	56		16		29	35	8	47	18	11	6	49	78	36	7	44	27	77	9	40	15	5	19	3	31	20	61	17	21	12	4	48
TcCLB.509897.270		40	34	6								2	1	28	60	10	32	56		16		29	35	8	47	18	11	6	49	78	36	7	44	27	77	9	40	15	5	19	3	31	20	61	17	21	12	4	48
TcCLB.509251.20		40	34	6								2	1	28	60	10	32	56		16		29	35	8	47	18	11	6	49	78	36	7	44	27	77	9	40	15	5	19	3	31	20	61	17	21	12	4	48
TcCLB.509217.40		40	34	6								2	1	28	60	10	32	56		16		29	35	8	47	18	11	6	49	78	36	7	44	27	77	9	40	15	5	19	3	31	20	61	17	21	12	4	48
TcCLB.508977.100010		40	34	6								2	1	28	60	10	32	56		16		29	35	8	47	18	11	6	49	78	36	7	44	27	77	9	40	15	5	19	3	31	20	61	17	21	12	4	48
TcCLB.510207.30		40	34	6								2	1	28	60	10	32	56	74	16		29	35	8	47	18	11	6	49	14	36	7	44	27	77	9	40	15	5	19	3	31	20	61	17	21	12	4	48
TcCLB.504787.40		40	34	6								2	1	28	60	10	32	56	74	16		29	35	8	47	18	11	6	49	14	36	7	44	27	77	9	40	15	5	19	3	31	20	61	17	21	12	4	48
TcCLB.507145.60		40	34	6								2	1	28	60	10	32	56	74	16		29	35	8	47	18	11	6	49	14	36	7	44	27	77	9	40	15	5	19	3	31	20	61	17	21	12	4	48
TcCLB.509899.40		40	34	6								2	1	28	60	10	32	56		16		29	35	8	47	18	11	6	49	78	36	7	44	27	77	9	40	15	5	19	3	31	20	61	17	21	12	4	48
TcCLB.509897.140		40	34	6								2	1	28	60	10	32	56		16		29	35	8	47	18	11	6	49	78	36	7	44	27	77	9	40	15	5	19	3	31	20	61	17	21	12	4	48
TcCLB.506131.1000120		40	34	6								2	1	28	60	10	32	56		16		29		8	47	18	11	6	49	78	36	7	44	27	77	9	40	15	5	19	3	31	20	61	17	21	12	4	48
TcCLB.432629.10		40	34	6								2	1	28	60	10		56		16		29	35	8	47	18	11	6	49	78	36	7	44	27	77	9	40	15	5	19	3	31	20	61	17	21	12		48
TcCLB.511643.40		40	34	6								2	1		60	10	32	56	74	16		29	35	8	47	18	11	6	49	14	36	7	44	27	77	9	40	15	5	19	3	31	20	61	17	21	12	4	48
TcCLB.506951.80		40	34	6								2	1	28	60	10	32	56		16		29	35	8	47	18	11	6	49	78	36	7	44	27	77	9	40	15	5	19	3	31	20	61	17	21	12	4	48
TcCLB.509897.1000160		40	34	6								2	1	28	60	10	32	56		16		29	35	8	47	18	11	6	49	78	36	7	44	27	77	9	40	15	5	19	3	31	20	61	17	21	12	4	48
TcCLB.508873.60		40	34	6							67	2	1	28	60	10	32	56	74	16		29	35	8	47	18	11	6	49	14	36	7	44	27	77	9	40	15	5	19	3	31	20	61	17	21	12	4	48
TcCLB.509699.220		40	34	6								2	1	28	60	10	32	56		16		29	35	8	47	18	11	6	49	78	36	7	44	27	77		40	15	5		3	31	20	61	17	21	12	4	48
TcCLB.507069.40		40	33	7								2	1	28	60	10	32	56	74	016-031		29		8	47	18	11	6		78	36	7	44	27	77	9	40	15	5	19	3	31	20	61	17	21	12	4
TcCLB.510713.90		40	33	7								2	1	28	60	10	32	56		16		29	35	8	47	18	11	6	49	78	36	7	44	27	77	9	40	15	5	19	3	31	20	61	17	21	12	4	48
TcCLB.510557.10		40	33	7								2	1	28	60	10	32	56		16		29	35	8	47	18	11	6	49	78	36	7	44	27	77	9	40	15	5	19	3	31	20	61	17	21	12	4	48
TcCLB.506909.100		40	33	7								2	1	28	60	10	32	56		16		29	35	8	47	18	11	6	49	78	36	7	44	27	77	9	40	15	5	19	3	31	20	61	17	21	12	4	48
TcCLB.508219.20		40	33	7								2	1	28	60	10	32	56		16		29	35	8	47	18	11	6	49	78	36	7	44	27	77	9	40	15	5	19	3	31	20	61	17	21	12	4	48
TcCLB.508047.60		40	33	7								2	1	28	60	10	32	56	74	16		29	35	8	47	18	11	6	49	78	36	7	44	27	77	9	40	15	5	19	3	31		61	17	21	12	4	48
TcCLB.511183.230		40	33	7								2	1	28	60	10	32	56	74	16		29	35	8	47	18	11	6	49	78	36	7	44	27	77	9	40	15	5	19	3	31	20	61	17	21	12	4	48
TcCLB.504081.80		40	33	7								2	1	28	60	10	32	56	74	16		29	35	8	47	18	11	6	49	78	36	7	44	27	77	9	40	15	5	19	3	31	20	61	17	21	12	4	48
TcCLB.511183.60		40	33	7								2	1	28	60	10	32	56	74	16		29	35	8	47	18	11	6	49	78	36	7	44	27	77	9	40	15	5	19	3	31	20	61	17	21	12	4	48
TcCLB.506335.100020		40	33	7								2	1	28	60	10	32	56	74	16		29	35	8	47	18	11	6	49	14	36	7	44	27	77	9	40	15	5	19	3	31	20	61	17	21	12	4	43
TcCLB.510021.180		40	33	7							67	2	1	28	60	10	32	56	74	16		29	35	8	47	18	11	6	49	14	36	7	44	27	77	9	40	15	5	19	3	31	20	61	17	21	12	4	48
TcCLB.506459.230		40	33	7							67	2	1	28	60	10	32	56	74	16		29	35	8	47	18	11	6	49	14	36	7	44	27	77	9	40	15	5	19	3	31	20	61	17	21	12	4	48
TcCLB.403739.20001		40	31	9								2	1	28	60	10	32	56	74	16		29	35	8	47	18	11	6	49	78	36	7	44	27	77	9	40	15	5	19	3	31	20	61	17	21	12	4
TcCLB.508103.30		40	30	10							089-067	2	1	28	60	10	32	56	74	016-064		29	35	8	47	18	11	6	49	78	36	7	44	27	77	9	40	15	5	19	3	31	20	61	17	21	12	4	48
TcCLB.477471.20001		40	29	11							098-067	2	1	28	30	10	72	23	41	16	70	29	35	8	22	18	11	6	55	14	50	7	26	84		9		15	5	46	3	38	20	62	17	21	34	4	43
TcCLB.510125.20		40	28	12								2	1	28	87	10	32	88		16	90	29	35	8	68	18	11	37		14	36	7		27		9	82	15	5	19	3	31	20		17	93	12	4	48
TcCLB.508171.10		40	28	12								2	1	28	87	10	32	88		16	90	29	35	8	68	18	11	37		14	36	7		27		9	82	15	5	19	3	31	20		17	93	12	4	48
TcCLB.508963.30		40	28	12								2	1	28	87	10	32	88		16	90	29	35	8	68	18	11	37		14	36	7		27		9	82	15	5	19	3	31	20		17	93	12	4	48
TcCLB.508515.150		40	28	12								2	1	28	87	10	32	88		16	90	29	35	8	68	18	11	37		14	36	7		27		9	82	15	5	19	3	31	20		17	93	12	4	48
TcCLB.511833.10		40	28	12								2	1	28	87	10	32	88		16	90	29	35	8	68	18	11	37		14	36	7		27		9	82	15	5	19	3	31	20		17	93	12	4	48
TcCLB.507555.50		40	28	12								2	1	28	87	10	32	88		16	90	29	35	8	68	18	11	37		14	36	7		27		9	82	15	5	19	3	31	20		17	93	12	4	48
TcCLB.510155.220		40	28	12								2	1	28	87	10	32	88		16	90	29	35	8	68	18	11	37		14	36	7		27		9	82	15	5	19	3	31	20		17	93	12	4	48
TcCLB.505993.30		40	28	12								2	1	28	87	10	32	88		16	90	29	35	8	68	18	11	37		14	36	7		27		9	82	15	5	19	3	31	20		17	93	12	4	48
TcCLB.510643.40		40	28	12								2	1	28	87	10	32	88		16	90	29	35	8	68	18	11	37		14	36	7		27		9	82	15	5	19	3	31	20		17	93	12	4	48
TcCLB.508399.100040		40	28	12								2	1	28	87	10	32	88		16	90	29	35	8	68	18	11	37		14	36	7		27		9	82	15	5	19	3	31	20		17	93	12	4	48
TcCLB.506083.20		40	27	13								2	1	028-089		10	32	88		16	90	29	35	8	68	18	11	37		14	36	7	44	27		9	82	15	5	19	3	31	20		17	93	12	4	48
TcCLB.508627.40		40	27	13								2	1	028-089		10	32	88		16	90	29	35	8	68	18	11	37		14	36	7	44	27		9	82	15	5	19	3	31	20		17	93	12	4	48
TcCLB.504115.10		40	27	13								2	1	28	87	10	54	96		16	90	29	35	8	68	18	11	37		14	36	7		27		9	82	15	5	19	3	31	20		17	93	12	4	48
TcCLB.506341.50		40	27	13								2	1	28	87	10	54	96		16	90	29	35	8	68	18	11	37		14	36	7		27		9	82	15	5	19	3	31	20		17	93	12	4	48
TcCLB.511861.50		40	27	13								2	1	28	87	10	54	96		16	90	29	35	8	68	18	11	37		14	36	7		27		9	82	15	5	19	3	31	20		17	93	12	4	48
TcCLB.506537.200		40	26	14								018-089-002	1	028-089		10	32	88		16	90	29	35	8	68	18	11	37		14	36	7	44	27		9	82	15	5	19	3	31	20		17	93	12	4	48
TcCLB.509931.20		40	26	14								2	1		87	10	54	96		16	90	29	35	8	68	18	11	37		14	36	7	44	27		9	82	15	5	19	3	31	20		17	93	12	4	48
TcCLB.511587.90		40	26	14								2	1		87	10	54	96		16	90	29	35	8	68	18	11	37		14	36	7	44	27		9	82	15	5	19	3	31	20		17	93	12	4	48
TcCLB.506683.110		40	26	14								2	1		87	10	54	96		16	90	29	35	8	68	18	11	37		14	36	7	44	27		9	82	15	5	19	3	31	20		17	93	12	4	48
TcCLB.506813.220		39	36	3								2	1	28	60	10	32	56		16		29	35	8	22	18	11	6		14	36	7	44	27	77	9	40	15	5	19	3	31	20	61	17	21	12	4	48
TcCLB.511797.240		39	35	4								2	1	28	60	10	32	56	74	16		29	35	8	22	18	11	6		14	36	7	44	27	77	9	40	15	5	19	3	31	20	61	17	21	12	4	48
TcCLB.511797.110		39	35	4								2	1	28	60	10	32	56	74	16		29	35	8	22	18	11	6		14	36	7	44	27	77	9	40	15	5	19	3	31	20	61	17	21	12	4	48
TcCLB.506067.1000230		39	35	4								2	1	28	60	10	32		74	16		29	35	8	22	18	11	6		78	36	7	44	27	77	9	40	15	5	19	3	31	20	61	17	21	12	4	48
TcCLB.506001.40		39	35	4								2	1	28	60	10	32	56		16		29		8	22	18	11	6	49	14	36	7	44	27	77	9	40	15	5	19	3	31	20	61	17	21	12	4	48
TcCLB.510361.10		39	34	5								2	1	28	60	10	32	56		16		29	35	8	47	18	11	6		14	36	7	44	27	77	9	40	15	5	19	3	31	20	61	17	21	12	4	48
TcCLB.510497.40		39	34	5								2	1	28	60	10	32	56		16		29	35	8	22	18	11	6		78	36	7	44	27	77	9	40	15	5	19	3	31	20	61	17	21	12	4	48
TcCLB.511255.350		39	34	5								2	1	28	60	10	32	56		16		29		8	22	18	11	6	49	78	36	7	44	27	77	9	40	15	5	19	3	31	20	61	17	21	12	4	48
TcCLB.508871.170		39	34	5								2	1	28	60	10	32	56		16			35	8	47	18	11	6	49	14	36	7	44	27	77	9	40	15	5	19	3	31	20	61	17	21	12	4	48
TcCLB.509545.40		39	34	5								2	1	28	60	10	32	56	74	16		29	35	8	47	18	11	6	49	14	36	7		27	77	9	40	15	5	19	3	31	20	61	17	21	12	4	48
TcCLB.508759.20		39	34	5								2	1	28	60	10	32	56		16		29		8	47	18	11	6	49	14	36	7	44	27	77	9	40	15	5	19	3	31	20	61	17	21	12	4	48
TcCLB.504007.20		39	34	5								2	1	28	60	10	32	56		16		29		8	22	18	11	6	49	78	36	7	44	27	77	9	40	15	5	19	3	31	20	61	17	21	12	4	48
TcCLB.509897.20		39	34	5								2	1	28	60	10	32	56		16		29	35	8	47	18	11	6		78	36	7	44	27	77	9	40	15	5	19	3	31	20	61	17	21	12	4	48
TcCLB.506245.190		39	34	5								2	1	28	60	10	32	56		16		29		8	22	18	11	6	49	78	36	7	44	27	77	9	40	15	5	19	3	31	20	61	17	21	12	4	48
TcCLB.509897.200		39	34	5								2	1	28	60	10	32	56		16		29	35	8	47	18	11	6		78	36	7	44	27	77	9	40	15	5	19	3	31	20	61	17	21	12	4	48
TcCLB.506139.170		39	34	5								2	1	28	60	10	32	56	74	16		29	35	8	47	18	11	6		14	36	7	44		77	9	40	15	5	19	3	31	20	61	17	21	12	4	48
TcCLB.510709.70		39	34	5								2	1	28	60	10	32	56		16		29		8	47	18	11	6	49	78	36	7		27	77	9	40	15	5	19	3	31	20	61	17	21	12	4	48
TcCLB.506955.270		39	34	5								2	1	28	60	10	32	56		16		29	35	8	47	18	11	6		78	36	7	44	27	77	9	40	15	5	19	3	31	20	61	17	21	12	4	48
TcCLB.509897.110		39	34	5								2	1	28	60	10	32	56		16		29	35	8	47	18	11	6		78	36	7	44	27	77	9	40	15	5	19	3	31	20	61	17	21	12	4	48
TcCLB.509115.20		39	34	5								2	1	28	60	10	32	56	74	16		29	35	8	47	18	11	6		14	36	7	44	27	77	9	40	15	5	19	3	31	20	61	17	21	12	4	48
TcCLB.511607.60		39	34	5								2	1	28	60	10	32	56	74	16		29	35	8	47	18	11	6	49	14	36	7		27	77	9	40	15	5	19	3	31	20	61		21	12	4	48
TcCLB.510371.90		39	34	5								2	1	28	60	10	32	56		16		29	35	8	47	18	11	6	49	14	36	7	44	27	77	9	40	15	5	19	3	31	20	61	17	21	12	4	48
TcCLB.509419.100090		39	34	5								2	1	28	60	10	32	56	74	16		29	35	8	47	18	11	6		14	36	7	44	27	77	9	40	15	5	19	3	31	20	61	17	21	12	4	48
TcCLB.507071.190		39	33	6								2	1	28	60	10	32	56		16		29	35	008-078		18	11	6	49	78	36	7	44	27	77	9	40	15	5	19	3	31	20	61		21	12	4	48
TcCLB.506173.70		39	33	6								2	1	28	60	10	32	56		16		29		8	47	18	11	6	49	78	36	7	44	27	77	9	40	15	5	19	3	31	20	61	17	21	12	4	48
TcCLB.508873.390		39	33	6								2	1	28	60	10	32	56		16		29	35	8	47	18	11	6	49	78	36	7	44	27	77	9	40	15	5	19	3	31	20	61	17	21	12	4	48
TcCLB.509685.40		39	33	6								2	1	28	60	10	32	56	74	16		29	35	8	47	18	11	6	49	14	36	7	44	27	77	9	40	15	5	19	3	31	20	61	17	21	12	4	48
TcCLB.508125.80		39	33	6								2	1	28	60	10	32	56	74	16		29	35	8	47	18	11	6	49	14	36	7	44	27	77	9	40	15	5	19	3	31	20	61	17	21	12	4	48
TcCLB.508221.400		39	33	6								2	1	28	60	10	32	56	74	16		29	35	8	47	18	11	6		78	36	7	44	27	77	9	40	15	5	19	3	31	20	61	17	21	12	4	48
TcCLB.509753.100020		39	33	6								2	1	28	60	10	32	56	74	16		29	35	8	47	18	11	6	49	78	36	7		27	77	9	40	15	5	19	3	31	20		17	21	12	4	48
TcCLB.510269.100060		39	33	6								2	1	28	60	10	32	56	74	16		29	35	8	47	18	11	6		78	36	7	44	27	77	9	40	15	5	19	3	31	20	61	17	21	12	4	48
TcCLB.423309.20001		39	33	6								2	1	28	60	10	32	56	74	16		29	35	8	47	18	11	6		78	36	7	44	27	77	9	40	15	5	19	3	31	20	61	17	21	12	4	48
TcCLB.505431.20001		39	33	6								2	1	28	60	10	32	56	74	16		29	35	8	47	18	11	6		78	36	7	44	27	77	9	40	15	5	19	3	31	20	61	17	21	12	4	48
TcCLB.507071.10		39	33	6								2	1	28	60	10	32	56		16	90	29	35	8	47	18	11	6		78	36	7	44	27	77	9	40	15	5	19	3	31	20	61	17	21	12	4
TcCLB.509753.90		39	33	6								2	1	28	60	10	32	56	74	16		29	35	8	47	18	11	6	49	78	36	7		27	77	9	40	15	5	19	3	31	20	61	17	21	12	4	48
TcCLB.511255.10		39	33	6								2	1	28	60	10	32	56		16		29		8	47	18	11	6	49	78	36	7	44	27	77	9	40	15	5	19	3	31	20	61	17	21	12	4	48
TcCLB.510197.100030		39	33	6								2	1		60	10	32	56	74	16		29	35	8	47	18	11	6	49	14	36	7	44	27	77	9	40	15	5	19	3	31	20	61	17	21	12	4	48
TcCLB.510275.1000110		39	33	6								2	1	28	60	10	32	56	74	16		29	35	8	47	18	11	6		78	36	7	44	27	77	9	40	15	5	19	3	31	20	61	17	21	12	4	48
TcCLB.508221.750		39	33	6								2	1	28	60	10	32	56		16		29		8	47	18	11	6	49	78	36	7	44	27	77	9	40	15	5	19	3	31	20	61	17	21	12	4	48
TcCLB.511921.100		39	33	6								2	1	28	60	10	32	56		16		29	35	8	47	18	11	6	49	78	36	7	44	27	77	9	40	15	5	19	3	31	20	61	17	21	12	4	48
TcCLB.506131.170		39	32	7								2	1	28	60	10	32	56		16		29		8	47	18	11	6	49	78	36	7	44	27	77	9	40	15	5	19	3	31	20	61	17	21	12	4	48
TcCLB.510047.80		39	32	7							018-067	2	1	28	60	10	32	56	74	16		29	35	8	47	18	11	6		14	36	7	44	27	77	9	40	15	5	19	3	31	20	61	17	21	12	4	48
TcCLB.507953.140		39	32	7								2	1	28	60	10	32	56	74	16		29	35	8	47	18	11	6	49	14	36	7	44	27	77	9	40	15	5	19	3	31	20	61	17	21	12	4	48
TcCLB.507953.100		39	32	7								2	1	28	60	10	32	56	74	16		29	35	8	47	18	11	6	49	14	36	7	44	27	77	9	40	15	5	19	3	31	20	61	17	21	12	4	48
TcCLB.506955.1000170		39	32	7								2	1	28	60	10	32	56	74	16		29	35	8	47	18	11	6	49	14	36	7	44	27	77	9	40	15	5	19	3	31	20	61	17	21	12	4	48
TcCLB.508871.110		39	32	7								2	1	28	60	10	32	56	74	16		29	35	8	47	18	11	6	49	14	36	7	44	27	77	9	40	15	5	19	3	31	20	61	17	21	12	4	48
TcCLB.506767.310		39	32	7								2	1	28	60	10	32	56	74	16		29	35	8	47	18	11	6	49	14	36	7	44	27	77	9	40	15	5	19	3	31	20	61	17	21	12	4	48
TcCLB.508541.120		39	32	7								2	1	28	60	10	32	56	74	16		29	35	8	47	18	11	6	49	14	36	7	44	27	77	9	40	15	5	19	3	31	20	61	17	21	12	4	48
TcCLB.506615.10		39	32	7								2	1	28	60	10	32	56	74	16		29	35	8	47	18	11	6	49	14	36	7	44	27	77	9	40	15	5	19	3	31	20	61	17	21	12	4	48
TcCLB.506603.40		39	32	7								2	1	28	60	10	32	56	74	16		29	35	8	47	18	11	6	49	14	36	7	44	27	77	9	40	15	5	19	3	31	20	61	17	21	12	4	48
TcCLB.510833.40		39	32	7								2	1	28	60	10	32	56	74	16		29	35	8	47	18	11	6	49	14	36	7	44	27	77	9	40	15	5	19	3	31	20	61	17	21	12	4	48
TcCLB.506615.150		39	32	7								2	1	28	60	10	32	56	74	16		29	35	8	47	18	11	6	49	14	36	7	44	27	77	9	40	15	5	19	3	31	20	61	17	21	12	4	48
TcCLB.510163.60		39	32	7								2	1	28	60	10	32	56	74	16		29	35	8	47	18	11	6	49	14	36	7	44	27	77	9	40	15	5	19	3	31	20	61	17	21	12	4	48
TcCLB.508113.20		39	32	7								2	1	28	60	10	32	56	74	16		29	35	8	47	18	11	6	49	14	36	7	44	27	77	9	40	15	5	19	3	31	20	61	17	21	12	4	48
TcCLB.503717.120		39	32	7								2	1	28	60	10	32	56	74	16		29	35	8	47	18	11	6	49	14	36	7	44	27	77	9	40	15	5	19	3	31	20	61	17	21	12	4	48
TcCLB.509979.320		39	32	7								2	1	28	60	10	32	56	74	16		29	35	8	47	18	11	6	49	14	36	7	44	27	77	9	40	15	5	19	3	31	20	61	17	21	12	4	48
TcCLB.510551.20		39	32	7								2	1	28	60	10	32	56	74	16		29	35	8	47	18	11	6	49	78	36	7	44	27	77	9	40	15	5	19	3	31	20	61	17	21	12	4	48
TcCLB.503601.10		39	32	7								2	1	28	60	10	32	56	74	16		29	35	8	47	18	11	6	49	14	36	7	44	27	77	9	40	15	5	19	3	31	20	61	17	21	12	4	48
TcCLB.510201.40		39	32	7								2	1	28	60	10	32	56	74	16		29	35	8	22	18	11	6	49	78	36	7	44	27	77	9	40	15	5					61	17	21	12	4	48
TcCLB.506751.90		39	32	7								2	1	28	60	10	32	56	74	16		29	35	8	47	18	11	6	49	14	36	7	44	27	77	9	40	15	5	19	3	31	20	61	17	21	12	4	48
TcCLB.510377.50		39	32	7								2	1	28	60	10	32	56	74	16		29	35	8	47	18	11	6	49	14	36	7	44	27	77	9	40	15	5	19	3	31	20	61	17	21	12	4	48
TcCLB.510033.30		39	32	7								2	1	28	60	10	32	56	74	16		29	35	8	47	18	11	6	49	14	36	7	44	27	77	9	40	15	5	19	3	31	20	61	17	21	12	4	48
TcCLB.510713.160		39	32	7								2	1	28	60	10	32	56	74	16		29	35	8	22	18	11	6		78	36	7	44	27	77	9	40	15	5	19	3	31	20	61	17	21	12	4
TcCLB.508871.10		39	32	7								2	1	28	60	10	32	56	74	16		29	35	8	47	18	11	6	49	14	36	7	44	27	77	9	40	15	5	19	3	31	20	61	17	21	12	4	48
TcCLB.506459.180		39	32	7								2	1	28	60	10	32	56	74	16		29	35	8	47	18	11	6	49	14	36	7	44	27	77	9	40	15	5	19	3	31	20	61	17	21	12	4	48
TcCLB.503973.340		39	32	7								2	1	28	60	10	32	56	74	16		29	35	8	47	18	11	6	49	14	36	7	44	27	77	9	40	15	5	19	3	31	20	61	17	21	12	4	48
TcCLB.506139.100060		39	31	8								2	1	28	60	10	32	56	74	16		29	35	8	47	18	11	6	49	14	36	7	44	27	77	9	40	15	5	19	3	31	20	61	17	21	12	4
TcCLB.510627.30		39	31	8								2	1	28	60	10	32	56	74	16		29	35	8	47	18	11	6	49	78	36	7	44	27	77	9	40	15	5	19	3	31	20	61	17	21	12	4	48
TcCLB.506609.30		39	31	8								2	1	28	60	10	32	56	74	16		29	35	8	47	18	11	6	49	78	36	7	44	27	77	9	40	15	5	19	3	31	20	61	17	21	12	4	48
TcCLB.506499.170		39	31	8								2	1	28	60	10	32	56	74	16		29	35	8	47	18	11	6	49	78	36	7	44	27	77	9	40	15	5	19	3	31	20	61	17	21	12	4	48
TcCLB.510021.220		39	31	8								2	1	28	60	10	32	56	74	16		29	35	8	22	18	11	6	49	78	36	7	44	27		9	40	15	5	19	3	31	20	61	17	21	12	4
TcCLB.504239.260		39	31	8								2	1	28	60	10	32	56	74	16		29	35	8	47	18	11	6	49	78	36	7	44	27	77	9	40	15	5	19	3	31	20	61	17	21	12	4	48
TcCLB.506667.160		39	31	8								2	1	28	60	10	32	56	74	16		29	35	8	47	18	11	6	49	78	36	7	44	27	77	9	40	15	5	19	3	31	20	61	17	21	12	4	48
TcCLB.510279.10		39	31	8								2	1	28	60	10	32	56	74	16		29	35	8	47	18	11	6		78	36	7	44	27	77	9	40	15	5	19	3	31	20	61	17	21	12	4
TcCLB.510377.10		39	31	8								2	1	28	60	10	32	56	74	16		29	35	8	47	18	11	6	49	78	36	7	44	27	77	9	40	15	5	19	3	31	20	61	17	21	12	4	48
TcCLB.511063.40		39	31	8								2	1	28	60	10	32	56	74	16		29	35	8	47	18	11	6	49	78	36	7	44	27	77	9	40	15	5	19	3	31	20	61	17	21	12	4
TcCLB.508165.40		39	31	8								2	1	28	60	10	32	56	74	16		29	35	8	22	18	11	6	49	78	36	7	44	27		9	40	15	5	19	3	31	20	61	17	21	12	4
TcCLB.508873.1000430		39	31	8								2	1	28	60	10	32	56	74	16		29	35	8	47	18	11	6	49	78	36	7	44	27	77	9	40	15	5	19	3	31	20	61	17	21	12	4	48
TcCLB.510061.30		39	30	9							018-089-067	2	1	28	60	10	32	56	74	16		29	35	8	47	18	11	6	49	14	36	7	44	27	77	9	40	15	5	19	3	31	20	61	17	21	12	004-090
TcCLB.508161.20		39	30	9								2	1	28	60	10	32	56	74	16		29	35	8	47	18	11	6	49	78	36	7	44	27		9	40	15	5	19	3	31	20	61	17	21	12	4
TcCLB.507653.20		39	29	10								2	1	28	30	10	72	23	41	16	70	29	35	8	22	18	11	6	55	14	50	7	26	84		9		15	5	46	3	38	20	62	17	21	34	4	43
TcCLB.507479.20		39	29	10								2	1	28	30	10	72	23	41	16	70	29	35	8	22	18	11	6	55	14	50	7	26	84		9		15	5	46	3	38	20	62	17	21	34	4	43
TcCLB.510359.1000490		39	28	11								2	1	028-099	30	10	72	23	41	16	70	29	35	8	22	18	11	6	55	14	50	7	26	84		9		15	5	46	3	38	20	62	17	21	34	4	43
TcCLB.415459.20001		39	27	12								2	1	028-089		10	32	88		16	90	29	35	8	68	18	11	37		14	36	7		27		9	82	15	5	19	3	31	20		17	93	12	4	48
TcCLB.509905.170		39	27	12								2	1	028-089		10	32	88		16	90	29	35	8	68	18	11	37		14	36	7		27		9	82	15	5	19	3	31	20		17	93	12	4	48
TcCLB.510093.20		39	27	12								2	1	028-089		10	32	88		16	90	29	35	8	68	18	11	37		14	36	7		27		9	82	15	5	19	3	31	20		17	93	12	4	48
TcCLB.504065.100050		39	27	12								2	1	28		10	54	96		16	90	29	35	8	68	18	11	37		14	36	7		27		9	82	15	5	19	3	31	20		17	93	12	4	48
TcCLB.511831.10		39	27	12								2	1	28	87	10	32	88		16	90	29	35	8	68	18	11	37		14	36	7		27		9	82	15	5	19	3	31	20		17	93	12	4	48
TcCLB.509295.100030		39	26	13								2	1	028-089		10	54	96		16	90	29	35	8	68	18	11	37		14	36	7		27		9	82	15	5	19	3	31	20		17	93	12	4	48
TcCLB.506623.20		39	26	13								2	1	028-089		10	54	96		16	90	29	35	8	68	18	11	37		14	36	7		27		9	82	15	5	19	3	31	20		17	93	12	4	48
TcCLB.509663.50		39	26	13								2	1	028-089		10	54	96		16	90	29	35	8	68	18	11	37		14	36	7		27		9	82	15	5	19	3	31	20		17	93	12	4	48
TcCLB.462379.20001		39	26	13								2	1	028-089		10	54	96		16	90	29	35	8	68	18	11	37		14	36	7		27		9	82	15	5	19	3	31	20		17	93	12	4	48
TcCLB.509387.10		39	26	13								2	1	028-089		10	54	96		16	90	29	35	8	68	18	11	37		14	36	7		27		9	82	15	5	19	3	31	20		17	93	12	4	48
TcCLB.508677.100040		39	26	13								2	1	28	87		54	96		16	90	29	35	8	68	18	11	37		14	36	7		27		9	82	15	5	19	3	31	20		17	93	12	4	48
TcCLB.511669.10		39	26	13								2	1		87	10	54	96		16	90	29	35	8	68	18	11	37		14	36	7		27		9	82	15	5	19	3	31	20		17	93	12	4	48
TcCLB.507759.10		39	26	13								2	1		87	10	54	96		16	90	29	35	8	68	18	11	37		14	36	7		27		9	82	15	5	19	3	31	20		17	93	12	4	48
TcCLB.506331.50		39	26	13								2	1		87	10	54	96		16	90	29	35	8	68	18	11	37		14	36	7		27		9	82	15	5	19	3	31	20		17	93	12	4	48
TcCLB.506217.40		39	26	13								2	1		87	10	54	96		16	90	29	35	8	68	18	11	37		14	36	7		27		9	82	15	5	19	3	31	20		17	93	12	4	48
TcCLB.509221.50		39	26	13								2	1	28	87	10	32	88		16	90		35	8	68	18	11	37		78	36	7		27		9	82	15	5	19	3	31	20		17	93	12	4	48
TcCLB.505997.80		39	26	13								2	1		87	10	54	96		16	90	29	35	8	68	18	11	37		14	36	7		27		9	82	15	5	19	3	31	20		17	93	12	4	48
TcCLB.507313.20		39	26	13								2	1		87	10	54	96		16	90	29	35	8	68	18	11	37		14	36	7		27		9	82	15	5	19	3	31	20		17	93	12	4	48
TcCLB.509765.50		39	26	13								2	1		87	10	54	96		16	90	29	35	8	68	18	11	37		14	36	7		27		9	82	15	5	19	3	31	20		17	93	12	4	48
TcCLB.510307.240		39	26	13								2	1		87	10	54	96		16	90	29	35	8	68	18	11	37		14	36	7		27		9	82	15	5	19	3	31	20		17	93	12	4	48
TcCLB.505201.50		39	26	13								2	1		87	10	54	96		16	90	29	35	8	68	18	11	37		14	36	7		27		9	82	15	5	19	3	31	20		17	93	12	4	48
TcCLB.506975.90		39	26	13								2	1		87	10	54	96		16	90	29	35	8	68	18	11	37		14	36	7		27		9	82	15	5	19	3	31	20		17	93	12	4	48
TcCLB.505365.60		39	26	13								2	1		87	10	54	96		16	90	29	35	8	68	18	11	37		14	36	7		27		9	82	15	5	19	3	31	20		17	93	12	4	48
TcCLB.508521.20		39	26	13								2	1	28	87		54	96		16	90	29	35	8	68	18	11	37		14	36	7		27		9	82	15	5	19	3	31	20		17	93	12	4	48
TcCLB.506961.150		39	25	14								2	1		87	10	54	96		16	90	29	35	8	68	18	11	37		14	36	7	44	27		9	82	15	5	19	3	31	20		17	93	12		48
TcCLB.506741.10		38	34	4										28	60	10	32	56		16		29	35	8	22	18	11	6		78	36	7	44	27	77	9	40	15	5	19	3	31	20	61		21	12	4	48
TcCLB.511923.1000100		38	34	4								2	1	28	60	10	32	56		16		29	35	8	22	18	11	6		78	36	7	44	27	77	9	40	15	5	19	3	31	20	61	17	21	12	4
TcCLB.508247.90		38	34	4								2	1	28	60	10	32	56	74	16		29	35	8	47	18	11	6		14	36	7		27	77	9	40	15	5	19	3	31	20	61	17	21	12	4	48
TcCLB.511077.100040		38	33	5								2	1	28	60	10	32	56		16		29		8	22	18	11	6	49	78	36	7	44	27		9	40	15	5	19	3	31	20	61	17	21	12	4	48
TcCLB.511599.80		38	33	5								2	1	28	60	10	32	56		16		29	35	8	47	18	11	6		14	36	7	44	27	77	9	40	15	5	19	3	31	20	61	17	21	12	4	48
TcCLB.508121.150		38	33	5								2	1	28	60	10	32	56		16			35	8	22	18	11	6	49	78	36	7	44	27	77	9	40	15	5	19	3	31	20	61		21	12	4	48
TcCLB.508221.180		38	33	5								2	1	28	60	10	32	56		16		29		8	47	18	11	6		78	36	7	44	27	77	9	40	15	5	19	3	31	20	61	17	21	12	4	48
TcCLB.509085.50		38	33	5										28		10	32	56		16		29	35	8	47	18	11		49	78	36	7	44	27	77	9	40	15	5	19	3	31	20	61	17	21	12	4	48
TcCLB.511255.190		38	32	6								2	1	28	60	10	32	56		16			35	8	47	18	11	6		78	36	7	44	27	77	9	40	15	5	19	3	31	20	61	17	21	12	4	48
TcCLB.504479.10		38	32	6								2	1	28	30	10		23	41	16		29	35	8	22	18	11	6	55	14	50	7	26	84		9		15	5	46	3	38	20	62	17	21	12	4	48
TcCLB.506589.130		38	32	6								2	1	28	60	10	32	56		16		29	35	8	47	18	11	6		78	36	7	44	27	77	9	40	15	5	19	3	31	20	61	17	21	12	004-018
TcCLB.506955.1000130		38	32	6								2	1	28		10	32	56	74	16		29	35	8	47	18	11	6	49	14	36	7	44	27	77	9	40	15	5	19	3	31	20	61	17	21	12	4	48
TcCLB.510377.330		38	32	6								2	1	28	60	10	32	56	74	16		29	35	8	22	18	11	6	49	14	36	7	44	27	77	9	40	15	5	19	3	31	20	61	17	21	12	4
TcCLB.511603.450		38	32	6								2	1	28	60	10	32	56	74	16		29	35	8	47	18	11	6	49	14	36	7		27	77	9	40	15	5	19	3	31	20	61	17	21	12	4	48
TcCLB.506967.10		38	32	6								2	1	28	60	10	32	56	74	16		29	35	8	47	18	11	6	49	14	36	7		27	77	9	40	15	5	19	3	31	20	61	17	21	12	4	48
TcCLB.508633.20		38	32	6								2	1	28	60	10	32	56	74	16		29	35	8	47	18	11	6		14	36	7	44	27	77	9	40	15	5	19	3	31	20	61	17	21	12	4	48
TcCLB.510363.60		38	32	6								2	1	28	60	10	32	56	74	16		29	35	8	47	18	11	6		78	36	7	44	27	77	9	40	15	5	19	3	31	20	61	17	21	12	4	48
TcCLB.510021.120		38	32	6								2	1	28	60	10	32	56	74	16		29	35	8	22	18	11	6	49	14	36	7	44	27	77	9	40	15	5	19	3	31	20	61	17	21	12	4
TcCLB.511871.150		38	32	6								2	1	28	60	10	32	56		16		29	35	8	22	18	11	6	49	78	36	7	44	27	77	9	40	15	5	19	3	31	20	61	17	21	12	4
TcCLB.506279.250		38	32	6													32	56		16	90	29	35	8	47	18	11	6	49	78	36	7	44	27	77	9	40	15	5	19	3	31	20	61	17	21	12	4	48
TcCLB.506335.1000130		38	32	6								2	1	28	60	10	32	56	74	16		29	35	8	22	18	11	6	49	14	36	7	44	27	77	9	40	15	5	19	3	31	20	61	17	21	12	4
TcCLB.509097.20		38	32	6								2	1	28	60	10	32	56	74	16		29	35	8	47	18	11	6	49	14	36	7		27	77	9	40	15	5	19	3	31	20	61	17	21	12	4	48
TcCLB.508877.10		38	32	6								2		28	60	10	32	56		16		29	35	8	47	18	11	6	49	78	36	7	44	27	77	9	40	15	5	19	3	31	20	61	17	21	12	4	48
TcCLB.511255.490		38	32	6								2	1	28		10	32	56	74	16		29	35	8	47	18	11	6	49	78	36	7	44	27	77	9	40	15	5	19	3	31	20	61	17	21	12	4	48
TcCLB.511873.10		38	32	6								2	1	28	60	10	32	56		16		29	35	8	22	18	11	6	49	78	36	7	44	27	77	9	40	15	5	19	3	31	20	61	17	21	12	4
TcCLB.506955.100090		38	32	6								2	1	28	60	10	32	56		16		29	35	8	47	18	11	6	49	14	36	7	44	27	77	9	40	15	5	19	3	31	20	61	17	21	12	4	48
TcCLB.506471.120		38	31	7							089-067	2	1	28	30	10		23	41	16		29	35	8	22	18	11	6	55	14	50	7	26	84		9		15	5	46	3	38	20	62	17	21	12	4
TcCLB.504101.50		38	31	7								2	1	28	60	10	32	56		016-028		29	35	8	47	18	11	6	49	14	36	7	44	27	77	9	40	15	5	19	3	31	20	61	17	21	12	4	48
TcCLB.510363.250		38	31	7										28	60	10	32	56	74	16		29	35	8	47	18	11	6	49	78	36	7	44	27	77	9	40	15	5	19	3	31	20	61	17	21	12	4	48
TcCLB.511255.1000160		38	31	7								2	1	28	60	10	32	56	74	16		29	35	8	47	18	11	6	49	14	36	7	44	27	77	9	40	15	5	19	3	31	20	61	17	21	12	4	48
TcCLB.508735.65		38	31	7								2	1	28	60	10		56	74	16		29	35	8	22	18	11	6	49	78	36	7	44	27	77	9	40	15	5	19	3	31	20	61	17	21	12	4
TcCLB.511061.40		38	31	7								2	1		60	10	32	56	74	16		29	35	8	47	18	11	6	49	14	36	7	44	27	77	9	40	15	5	19	3	31	20	61	17	21	12	4
TcCLB.507997.30		38	31	7								2	1	28	60	10	32	56		16		29	35	8	47	18	11	6	49	78	36	7	44	27	77	9	40	15	5	19	3	31	20	61	17	21	12	4	48
TcCLB.507283.100010		38	31	7								2	1	28	60	10	32	56	74	16		29	35	8	47	18	11	6	49	14	36	7	44	27	77	9	40	15	5	19	3	31	20	61	17	21	12	4
TcCLB.511185.80		38	31	7								2	1	28	60	10	32	56	74	16		29	35	8	47	18	11	6		78	36	7	44	27	77	9	40	15	5	19	3	31	20	61	17	21	12	4
TcCLB.510025.50		38	31	7							67	2	1	28	60	10	32	56	74	16		29		8	47	18	11	6	49	14	36	7	44	27	77	9	40	15	5	19	3	31	20	61	17	21	12	4
TcCLB.509549.10		38	30	8								2	1	28	60	10	32	56	74	16		29	35	8	47	18	11	6	49	14	36	7	44	27	77	9	40	15	5	19	3	31	20	61	17	21	12	004-090
TcCLB.507357.100		38	30	8								2	1	28	60	10	32	56	74	16		29	35	8	47	18	11	6	49	14	36	7	44	27	77	9	40	15	5	19	3	31	20	61	17	21	12	004-090
TcCLB.506451.20		38	30	8										28	60	10	32	56	74	16		29	35	8	47	18	11	6	49	14	36	7	44	27	77	9	40	15	5	19	3	31	20	61	17	21	12	4
TcCLB.511183.430		38	30	8								2	1	28	60	10	32	56	74	16		29	35	8	47	18	11	6		78	36	7	44	27	77	9	40	15	5	19	3	31	20	61	17	21	12	4
TcCLB.508433.40		38	30	8								2	1	28	60	10	32	56	74	16		29	35	8	47	18	11	6	49	78	36	7	44	27	77	9	40	15	5	19	3	31	20	61	17	21	12	4
TcCLB.511255.700		38	30	8								2	1	28	60	10	32	56	74	16		29	35	8	47	18	11	6	49	78	36	7	44	27	77	9	40	15	5	19	3	31	20	61	17	21	12	4
TcCLB.506667.90		38	30	8								2	1	28	60	10	32	56	74	16		29	35	8	47	18	11	6	49	78	36	7	44	27	77	9	40	15	5	19	3	31	20	61	17	21	12	4
TcCLB.506759.90		38	30	8								2	1	28	60	10	32	56	74	16		29	35	8	47	18	11	6	49	78	36	7	44	27	77	9	40	15	5	19	3	31	20	61	17	21	12	4
TcCLB.510359.530		38	29	9								2	1	28	60	10	32	56	74	16		29	35	8	47	18	11	6	49	78	36	7	44	27	77	9	40	15	5	19	3	31	20	61	17	21	12	004-067
TcCLB.509785.50		38	29	9								2	1	028-077	60	10	32	56	74	16		29		8	22	18	11	6	49	78	36	7	44	27	77	9	40	15	5	19	3	31	20	61	17	21	12	4
TcCLB.510483.210		38	29	9								2	1	28	60	10	32	56	74	16		29	35	8	47	18	11	6	49	78	36	7	44	27	77	9	40	15	5		3	31	20	61	17	21	12	4
TcCLB.472357.10		38	29	9								2	1	28	60	10	32	56	74	16		29		8	47	18	11	6	49	78	36	7	44	27	77	9	40	15	5	19	3	31	20	61	17	21	12	4
TcCLB.511885.20		38	29	9								2	1	28	30	10		23	41	16	70	29	35	8	22	18	11	6	55	14	50	7	26	84		9		15	5	46	3	38	20	62	17	21	34	4	43
TcCLB.506757.120		38	29	9								2	1	28	60	10	32	56	74	16		29		8	47	18	11	6	49	78	36	7	44	27	77	9	40	15	5	19	3	31	20	61	17	21	12	4
TcCLB.504343.10		38	29	9								2	1	28	30	10		23	41	16	70	29	35	8	22	18	11	6	55	14	50	7	26	84		9		15	5	46	3	38	20	62	17	21	34	4	43
TcCLB.510411.10		38	28	10								2	1	028-099	30	10		23	41	16	70	29	35	8	22	18	11	6	55	14	50	7	26	84		9		15	5	46	3	38	20	62	17	21	034-097	4	43
TcCLB.506345.90		38	28	10								2	1	028-099	30	10		23	41	16	70	29	35	8	22	18	11	6	55	14	50	7	26	84		9		15	5	46	3	38	20	62	17	21	034-055	4	43
TcCLB.503501.50		38	28	10								2	1	028-099	30	10		23	41	16	70	29	35	8	22	18	11	6	55	14	50	7	26	84		9		15	5	46	3	38	20	62	17	21	34	4	43
TcCLB.509739.10		38	28	10								2	1	028-099	30	10		23	41	16	70	29	35	8	22	18	11	6	55	14	50	7	26	84		9		15	5	46	3	38	20	62	17	21	34	4	43
TcCLB.506537.80		38	28	10								2	1	028-099	30	10	72	23	41	16	70	29	35	8	22	18	11	6	55	14	50	7	26	84		9		15	5	46	3	38	20	62	17	21	34	4	43
TcCLB.505267.100020		38	28	10								2	1	028-099	30	10		23	41	16	70	29	35	8	22	18	11	6	55	14	50	7	26	84		9		15	5	46	3	38	20	62	17	21	34	4	43
TcCLB.509905.100060		38	28	10								2	1	028-099	30	10		23	41	16	70	29	35	8	22	18	11	6	55	14	50	7	26	84		9		15	5	46	3	38	20	62	17	21	34	4	43
TcCLB.504219.40		38	28	10								2	1	028-099	30	10		23	41	16	70	29	35	8	22	18	11	6	55	14	50	7	26	84		9		15	5	46	3	38	20	62	17	21	34	4	43
TcCLB.508001.100050		38	28	10								2	1	028-099	30	10		23	41	16	70	29	35	8	22	18	11	6	55	14	50	7	26	84		9		15	5	46	3	38	20	62	17	21	34	4	43
TcCLB.504183.20		38	28	10								2	1	028-099	30	10		23	41	16	70	29	35	8	22	18	11	6	55	14	50	7	26	84		9		15	5	46	3	38	20	62	17	21	34	4	43
TcCLB.511349.100		38	28	10								2	1	028-099	30	10		23	41	16	70	29	35	8	22	18	11	6	55	14	50	7	26	84		9		15	5	46	3	38	20	62	17	21	34	4	43
TcCLB.507381.20		38	28	10								2	1	028-099	30	10		23	41	16	70	29	35	8	22	18	11	6	55	14	50	7	26	84		9		15	5	46	3	38	20	62	17	21	34	4	43
TcCLB.508061.20		38	28	10								2	1	028-099	30	10		23	41	16	70	29	35	8	22	18	11	6	55	14	50	7	26	84		9		15	5	46	3	38	20	62	17	21	34	4	43
TcCLB.509915.100050		38	28	10								2	1	028-099	30	10		23	41	16	70	29	35	8	22	18	11	6	55	14	50	7	26	84		9		15	5	46	3	38	20	62	17	21	34	4	43
TcCLB.510451.10		38	28	10								2	1	28	30	10	72	23	41	16		29	35	8	22	18	11	6	55	14	50	7	26	84		9		15	5	46	3	38	20	62	17	21	34	4	43
TcCLB.508903.110		38	26	12									1	028-089		10	32	88		16	90	29	35	8	68	18	11	37		14	36	7		27		9	82	15	5	19	3	31	20		17	93	12	4	48
TcCLB.509815.100020		38	26	12								2	1		87	10	54	96		16	90	29	35	8	68	18	11	37		14	36	7		27		9		15	5	19	3	31	20		17	93	12	4	48
TcCLB.509959.60		38	25	13								2	1		87	10	54	96		16	90		35	8	68	18	11	37		14	36	7		27		9	82	15	5	19	3	31	20		17	93	12	4	48
TcCLB.503861.40		38	25	13								2	1		87	10	54	96		16	90	29	35	8	68	18	11	37		14	36	7		27		9	82	15	5	19	3	31	20		17	93	12		48
TcCLB.506741.100		37	33	4								2	1	28	60	10	32	56		16			35	8	22	18	11	6		78	36	7	44	27	77	9	40	15	5	19	3	31	20	61		21	12	4	48
TcCLB.507523.10		37	32	5													32	56	74	16		29	35	8	22	18	11	6		78	36	7	44	27	77	9	40	15	5	19	3	31	20	61	17	21	12	4	43
TcCLB.506737.90		37	32	5								2	1	28	60	10	32		74	16		29		8	47	18	11	6		78	36	7	44	27	77	9	40	15	5	19	3	31		61	17	21	12	4	48
TcCLB.508229.40		37	32	5								2	1	28	60	10	32	56		16		29		8	47	18	11	6	49	14		7	44	27	77	9	40	15	5	19	3	31	20	61	17	21	12	4	48
TcCLB.508219.170		37	32	5								2	1	28	60	10	32	56		16			35	8	47	18	11	6	49	78	36	7		27	77	9	40	15	5	19	3	31	20	61	17	21		4	48
TcCLB.504155.280		37	32	5								2	1	28	60	10	32	56	74	16		29	35	8	22	18	11	6	49	14	36	7		27	77	9	40	15	5	19	3	31	20	61	17	21	12	4
TcCLB.510239.80		37	32	5								2	1	28	60	10	32	56	74	16		29	35	8	22	18	11	6	49	14	36	7		27	77	9	40	15	5	19	3	31	20	61	17	21	12	4
TcCLB.504249.100		37	31	6								2	1	28		10	32	56	74	16		29	35	8	47	18	11	6	49	14	36	7	44	27	77	9	40	15	5	19	3	31	20	61	17	21	12	4	48
TcCLB.506597.40		37	31	6								2	1	28	60	10	32	56	74	16		29	35	8	47	18	11	6	49	14		7		27	77	9	40	15	5	19	3	31	20	61	17	21	12	4	48
TcCLB.506187.40		37	31	6								2	1	28		10	32	56	74	16		29	35	8	47	18	11	6	49	14	36	7	44	27	77	9	40	15	5	19	3	31	20		17	21	12	4	48
TcCLB.511487.90		37	31	6								2	1	28	60	10	32	56		16		29	35	8	47	18	11	6	49	14	36	7		27	77	9	40	15	5	19	3	31	20	61	17	21	12	4
TcCLB.504081.390		37	31	6								2	1	28	60	10	32	56	74	16		29	35	8	47	18	11	6		78	36	7	44	27	77	9	40	15	5		3	31	20	61	17	21		4	48
TcCLB.508499.39		37	30	7								2	1	28	60	10	32	56		16		29	35	8	47	18	11	6	49	78	36	7	44	27	77	9	40	15	5	19	3	31	20	61	17	21	12	4
TcCLB.508495.1000100		37	30	7								2	1	28	60	10	32	56		16		29	35	8	47	18	11	6	49	78	36	7	44	27	77	9	40	15	5	19	3	31	20	61	17	21	12	4
TcCLB.511057.40		37	30	7								2	1	28	60	10	32	56	74	16		29		8	22	18	11	6	49	78	36	7	44	27	77	9	40	15	5	19	3	31	20	61	17	21	12	4
TcCLB.508139.100080		37	30	7								2	1	28	60	10		56	74	16		29	35	8	22	18	11	6	49	78	36	7	44	27	77		40	15	5	19	3	31	20	61	17	21	12	4
TcCLB.508539.130		37	30	7										28	60	10	32	56	74	16		29	35	8	47	18	11	6	49	14	36	7	44	27	77	9	40	15	5	19	3	31	20	61	17	21	12	4	48
TcCLB.508493.100060		37	30	7								2	1	28	60	10	32	56		16		29	35	8	47	18	11	6	49	78	36	7	44	27	77	9	40	15	5	19	3	31	20	61	17	21	12	4
TcCLB.508495.100020		37	30	7								2	1	28	60	10	32	56		16		29	35	8	47	18	11	6	49	78	36	7	44	27	77	9	40	15	5	19	3	31	20	61	17	21	12	4
TcCLB.504081.540		37	29	8								2	1	28	60	10	32	56	74	16		29	35	008-078		18	11	6	49	14	36	7	44	27	77	9	40	15	5	19	3	31	20	61	17	21	12	004-090
TcCLB.505949.30		37	29	8								2	1	28	60	10	32	56	74	16		29	35	008-078		18	11	6	49	14	36	7	44	27	77	9	40	15	5	19	3	31	20	61	17	21	12	004-090
TcCLB.510205.40		37	29	8								2	1	28	60	10	32	56	74	16		029-081		8	22	18	11	6	49	78	36	7	44	27	77	9	40	15	5	19	3	31	20	61	17	21	12	4
TcCLB.511183.190		37	29	8								2	1	28	60	10	32	56	74	16		29	35	8	47	18	11	6		78	36	7	44	27	77	9	40	15	5	19	3	31	20	61	17	21	12	004-083
TcCLB.507875.220		37	29	8								2	1	28	30	10	72	23	41	16	70	29	35	8	22	18	11	6	55	14	50	7	26	84		9		15	5	46	3	38	20		17	21	34	4	43
TcCLB.504265.20001		37	29	8								2	1	28	30	10	72	23	41	16	70	29	35	8	22	18	11	6	55	14	50	7	26	84		9		15	5	46	3	38	20	62	17	21	34	4	43
TcCLB.507879.10		37	29	8								2	1	28	30	10		23	41	16	70	29	35	8	22	18	11	6	55	14	50	7	26	84		9		15	5	46	3	38	20		17	21	34	4	43
TcCLB.507819.30		37	29	8								2	1	28	30	10		23	41	16	70	29	35	8	22	18	11	6	55	14	50	7	26	84		9		15	5	46	3	38	20	62	17	21	34	4	43
TcCLB.511675.10		37	29	8								2	1	28	60	10	32	56		16			35	8	47	18	11	6	49	78	36	7	44	27	77	9	40	15	5	19	3	31	20	61	17	21	12	4
TcCLB.508055.30		37	29	8								2	1	28	30	10		23	41	16	70	29	35	8	22	18	11	6	55	14	50	7	26	84		9		15	5	46	3	38	20	62	17	21	34	4	43
TcCLB.503403.20		37	29	8								2	1	28	30	10		23	41	16		29	35	8	22	18	11	6	55	14	50	7	26	84		9		15	5	46	3	38	20	62	17	21	12	4	43
TcCLB.506667.50		37	29	8								2	1	28	60	10	32	56	74	16		29	35	8	47	18	11	6	49	78	36	7	44	27	77	9	40	15	5		3	31	20	61	17	21	12	4
TcCLB.508523.30		37	28	9								2	1	028-099	30	10		23	41	16	70	29	35	8	22	18	11	6	55	14	50	7	26	84		9		15	5	46	3	38	20		17	21	34	4	43
TcCLB.506345.40		37	28	9								2	1	028-099	30	10		23	41	16		29	35	8	22	18	11	6	55	14	50	7	26	84		9		15	5	46	3	38	20	62	17	21	34	4	43
TcCLB.509771.10		37	28	9								2	1	028-099	30	10		23	41	16	70	29	35	8	22	18	11	6	55	14	50	7	26	84		9		15	5	46	3	38	20	62	17	21	34	4	43
TcCLB.506757.90		37	28	9								2	1	028-099	30	10		23	41	16	70	29	35	8	22	18	11	6	55	14	50	7	26	84		9		15	5	46	3		20	62	17	21	34	4	43
TcCLB.511667.80		37	28	9								2	1	028-099	30	10		23	41	16	70	29	35	8	22	18	11	6	55	14	50	7	26	84		9		15	5	46	3		20	62	17	21	34	4	43
TcCLB.510927.20		37	28	9								2	1	028-099	30	10		23	41	16	70	29	35	8	22	18	11	6	55	14	50	7	26	84		9		15	5	46	3		20	62	17	21	34	4	43
TcCLB.508999.120		37	28	9								2	1	028-077	60	10	32	56	74	16		29		8	47	18	11	6	49	78	36	7	44	27	77	9	40	15	5	19	3	31	20	61	17	21	12	4
TcCLB.506471.100		37	28	9								2	1	028-099	30	10		23	41	16	70	29	35	8	22	18	11	6	55	14	50	7	26	84		9		15	5	46	3		20	62	17	21	34	4	43
TcCLB.510111.20		37	28	9								2	1	028-099	30	10		23	41	16	70	29	35	8	22	18	11	6	55	14	50	7	26	84		9		15	5	46	3		20	62	17	21	34	4	43
TcCLB.507821.130		37	28	9								2	1	028-099	30	10		23	41	16	70	29	35	8	22	18	11	6	55	14	50	7	26	84		9		15	5	46	3		20	62	17	21	34	4	43
TcCLB.508285.60		37	28	9								2	1	028-099	30	10		23	41	16	70	29	35	8	22	18	11	6	55	14	50	7	26	84		9		15	5	46	3	38	20	62	17	21	34	4	43
TcCLB.504055.130		37	28	9								2	1	028-099	30	10		23	41	16		29	35	8	22	18	11	6	55	14	50	7	26	84		9		15	5	46	3	38	20	62	17	21	34	4	43
TcCLB.506765.40		37	28	9								2	1	028-099	30	10		23	41	16	70	29	35	8	22	18	11	6	55	14	50	7	26	84		9		15	5	46	3		20	62	17	21	34	4	43
TcCLB.508293.1000160		37	28	9								2	1	28	30	10	72	23	41	16	70	29	35	8	22	18	11	6	55	14	50	7	26	84		9		15	5	46	3	38	20	62	17	21	34	4	43
TcCLB.505609.10		37	28	9								2	1	28	30	10	72	23	41	16		29	35	8	22	18	11	6	55	14	50	7	26	84		9		15	5	46	3	38	20	62	17	21	34	4	43
TcCLB.507859.100080		37	28	9								2	1	28	30	10	72	23	41	16	70	29	35	8	22	18	11	6	55	14	50	7	26	84		9		15	5	46	3	38	20	62	17	21	34	4	43
TcCLB.506809.10		37	28	9								2	1	28	30	10	72	23	41	16		29	35	8	22	18	11	6	55	14	50	7	26	84		9		15	5	46	3	38	20	62	17	21	34	4	43
TcCLB.507611.170		37	28	9								2	1	28	30	10		23	41	16		29	35	8	22	18	11	6	55	14	50	7	26	84		9		15	5	46	3	38	20	62	17	21	34	4	43
TcCLB.504393.30		37	28	9								2	1	28	30	10	72	23	41	16		29	35	8	22	18	11	6	55	14	50	7	26	84		9		15	5	46	3	38	20	62	17	21	34	4	43
TcCLB.511797.210		37	28	9								2	1	28	30	10	72	23	41	16	70	29	35	8	22	18	11	6	55	14	50	7	26	84		9		15	5	46	3	38	20	62	17	21	34	4	43
TcCLB.507125.10		37	28	9								2	1	28	30	10		23	41	16		29	35	8	22	18	11	6	55	14	50	7	26	84		9		15	5	46	3	38	20	62	17	21	34	4	43
TcCLB.509185.30		37	28	9								2	1	28	30	10		23	41	16		29	35	8	22	18	11	6	55	14	50	7	26	84		9		15	5	46	3	38	20	62	17	21	34	4	43
TcCLB.503871.10		37	28	9								2	1	28	30	10	72	23	41	16	70	29	35	8	22	18	11	6	55	14	50	7	26	84		9		15	5	46	3	38	20	62	17	21	34	4	43
TcCLB.508389.160		37	28	9								2	1	28	30	10	72	23	41	16	70	29	35	8	22	18	11	6	55	14	50	7	26	84		9		15	5	46	3	38	20	62	17	21	34	4	43
TcCLB.506539.100010		37	28	9								2	1	28	30	10	72	23	41	16	70	29	35	8	22	18	11	6	55	14	50	7	26	84		9		15	5	46	3	38	20	62	17	21	34	4	43
TcCLB.507047.40		37	28	9								2	1	28	30	10	72	23	41	16		29	35	8	22	18	11	6	55	14	50	7	26	84		9		15	5	46	3	38	20	62	17	21	34	4	43
TcCLB.507839.40		37	28	9								2	1	28	30	10	72	23	41	16		29	35	8	22	18	11	6	55	14	50	7	26	84		9		15	5	46	3	38	20	62	17	21	34	4	43
TcCLB.511391.100060		37	28	9								2	1	28	30	10		23	41	16	70	29	35	8	22	18	11	6	55	14	50	7	26	84		9		15	5	46	3	38	20	62	17	21	34	4	43
TcCLB.506973.100050		37	28	9								2	1	28	30	10	72	23	41	16	70	29	35	8	22	18	11	6	55	14	50	7	26	84		9		15	5	46	3	38	20	62	17	21	34	4	43
TcCLB.510625.210		37	28	9								2	1	28	30	10	72	23	41	16	70	29	35	8	22	18	11	6	55	14	50	7	26	84		9		15	5	46	3	38	20	62	17	21	34	4	43
TcCLB.506757.60		37	28	9								2	1	28	60	10	32	56	74	16		29		8	47	18	11	6	49	78	36	7	44	27	77	9	40	15	5	19	3	31	20	61	17	21	12	4
TcCLB.509187.10		37	28	9								2	1	28	30	10	72	23	41	16		29	35	8	22	18	11	6	55	14	50	7	26	84		9		15	5	46	3	38	20	62	17	21	34	4	43
TcCLB.503759.10		37	28	9								2	1	28	30	10	72	23	41	16		29	35	8	22	18	11	6	55	14	50	7	26	84		9		15	5	46	3	38	20	62	17	21	34	4	43
TcCLB.508121.30		37	28	9								2	1	28	30	10	72	23	41	16	70	29	35	8	22	18	11	6	55	14	50	7	26	84		9		15	5	46	3	38	20	62	17	21	34	4	43
TcCLB.509513.10		37	28	9								2	1	28	30	10	72	23	41	16		29	35	8	22	18	11	6	55	14	50	7	26	84		9		15	5	46	3	38	20	62	17	21	34	4	43
TcCLB.509821.20		37	28	9								2	1	28	30	10	72	23	41	16		29	35	8	22	18	11	6	55	14	50	7	26	84		9		15	5	46	3	38	20	62	17	21	34	4	43
TcCLB.507255.20		37	28	9								2	1	28	30	10		23	41	16		29	35	8	22	18	11	6	55	14	50	7	26	84		9		15	5	46	3	38	20	62	17	21	34	4	43
TcCLB.510469.30		37	28	9								2	1	28	30	10	72	23	41	16	70	29	35	8	22	18	11	6	55	14	50	7	26	84		9		15	5	46	3	38	20	62	17	21	34	4	43
TcCLB.506723.20		37	27	10								2	1	28	87	10	54	96		16	90	29	35	8	68	18	11	37		14	36	7		27		9	82	15	5	19	3	31	20		17	93	12	4	48
TcCLB.504389.20001		37	27	10								089-002	1	28	30	10		23	41	16		29	35	8	22	18	11	6	55	14	50	7	26	84		9		15	5	46	3	38	20	62	17	21	34	4	43
TcCLB.507869.20		37	26	11								2	1	28	87	10	32	88		16	90	29	35	8	68	18	11	37		14	36	7		27		9	82	15	5	19	3	31	20		17	93	12	4	48
TcCLB.508903.10		37	25	12										028-089		10	32	88		16	90	29	35	8	68	18	11	37		14	36	7		27		9	82	15	5	19	3	31	20		17	93	12	4	48
TcCLB.421461.20001		37	25	12							062-067	2	1	28	30	10	72	023-036		16	70	29	35	8	47	18	11	6	55	14	50	7	26	84		9		15	5	46	3	38	20	62	17	21	34	4	43
TcCLB.510847.10		37	24	13											87	10	54	96		16	90	29	35	8	68	18	11	37		14	36	7		27		9	82	15	5	19	3	31	20		17	93	12	4	48
TcCLB.510363.310		36	31	5										28	60	10	32	56		16		29		8	47	18	11	6		78	36	7	44	27	77	9	40	15	5	19	3	31	20	61	17	21	12	4	48
TcCLB.507185.40		36	31	5								2	1	28	60	10	32	56		16		29	35	8	47	18	11	6		14	36	7	44	27	77	9	40	15	5	19	3	31	20	61	17	21	12	4
TcCLB.506965.170		36	31	5								2	1	28	60	10	32	56		16		29	35	8	47	18	11	6	49	14	36	7		27	77	9	40	15	5	19	3	31	20	61	17	21	12	4
TcCLB.511173.1000190		36	31	5								2	1	28	60	10	32	56		16		29	35	8	22	18	11	6	49	78	36	7		27	77	9	40	15	5	19	3	31	20	61	17	21	12	4
TcCLB.506139.120		36	31	5								2	1	28	60	10	32	56		16		29	35	8	22	18	11	6		78	36	7	44	27	77	9	40	15	5	19	3	31	20	61	17	21	12	4
TcCLB.511173.440		36	31	5								2	1	28	60	10	32	56		16		29	35	8	47	18	11	6	49	14	36	7		27	77	9	40	15	5	19	3	31	20	61	17	21	12	4
TcCLB.507237.10		36	31	5								2	1	28	60	10	32	56		16		29	35	8	47	18	11	6	49	14	36	7		27	77	9	40	15	5	19	3	31	20	61	17	21	12	4
TcCLB.509755.10		36	31	5								2	1	28	60	10	32	56		16		29	35	8	22	18	11	6		78	36	7	44	27	77	9	40	15	5	19	3	31	20	61	17	21	12	4
TcCLB.506911.30		36	30	6								2	1	28	60	10	32	56	74	16		29	35	008-078		18	11	6		14	36	7	44	27	77	9	40	15	5	19	3	31	20	61	17	21	12	4
TcCLB.508149.60		36	30	6								2	1	28	60	10	32	56		16		29	35	8	22	18	11	6	49	78	36	7	44	27	77	9	40	15	5	19	3	31	20	61	17	21	12	4
TcCLB.508607.50		36	29	7							089-067	2	1	28	30	10		23	41	16		29	35	8	22	18	11	6	55	14	50	7	26	84		9		15	5	46	3	38	20	62	17	21	12	4
TcCLB.506955.100050		36	29	7								2	1	028-036		10	32	56	74	16		29	35	8	47	18	11	6	49	14	36	7	44	27	77		40	15	5	19	3	31	20		17	21	12	4	48
TcCLB.510403.30		36	29	7								2	1	28	30	10	72	23	41	16	70	29	35	8	22	18	11	6	55	14	50	7	26	84		9		15	5	46	3	38	20		17	21	34	4	43
TcCLB.510095.20		36	29	7								2	1	28	30	10		23	41	16		29	35	8	22	18	11	6	55	14	50	7	26	84		9		15	5	46	3	38	20	62	17	21	12	4	43
TcCLB.506331.90		36	29	7								2	1	28	30	10		23	41	16		29	35	8	22	18	11	6	55	14	50	7	26	84		9		15	5	46	3	38	20	62	17	21	12	4	43
TcCLB.508577.100010		36	29	7								2	1	28	30	10		23	41	16		29	35	8	22	18	11	6	55	14	50	7	26	84		9		15	5	46	3	38	20	62	17	21	12	4	43
TcCLB.510359.430		36	29	7								2	1	28	60	10	32	56	74	16		29		8	47	18	11	6	49	78	36	7	44	27	77	9	40	15	5	19	3	31	20	61	17	21	12	4
TcCLB.506241.30		36	29	7								2	1	28	30	10		23	41	16	70	29	35	8	22	18	11	6	55	14	50	7	26	84		9		15	5	46	3	38	20	62	17	21	34	4	43
TcCLB.508221.1000530		36	29	7								2	1	28	60		32	56		16		29	35	8	47	18	11	6	49	78	36	7	44	27	77	9	40	15	5	19	3	31	20	61	17	21	12	4	48
TcCLB.505231.20		36	29	7								2	1	28	30	10		23	41	16	70	29	35	8	22	18	11	6	55	14	50	7	26	84		9		15	5	46	3	38	20	62	17	21	34	4	43
TcCLB.506455.30		36	29	7								2	1	28	30	10		23	41	16	70	29	35	8	22	18	11	6	55	14	50	7	26	84		9		15	5	46	3	38	20	62	17	21	34	4	43
TcCLB.463323.10		36	29	7								2	1	28	30	10		23	41	16	70	29	35	8	22	18	11	6	55	14	50	7	26	84		9		15	5	46	3	38	20	62	17	21	34	4	43
TcCLB.508745.30		36	29	7								2	1	28	60	10	32	56	74	16		29	35	8	47	18	11	6		78	36	7	44	27	77	9	40	15	5	19	3	31	20	61	17	21	12	4
TcCLB.464253.20001		36	29	7							67	2	1	28	30	10		23	41	16		29	35	8	22	18	11	6	55	14	50	7	26	84		9		15	5	46	3	38	20	62	17	21	34	4
TcCLB.507085.100080		36	29	7								2	1	28	60	10	32	56		16		29	35	8	47	18	11		49	78	36	7	44	27	77	9	40	15	5	19	3	31	20	61	17	21	12	4
TcCLB.508221.790		36	28	8								2	1	28	60	10	32	56	74	16		29	35	008-078		18	11	6		78	36	7	44	27	77	9	40	15	5	19	3	31	20	61	17	21	12	004-090
TcCLB.510361.180		36	28	8								2	1	28	60	10	32	56	74	16		29	35	008-078		18	11	6		78	36	7	44	27	77	9	40	15	5	19	3	31	20	61	17	21	12	004-090
TcCLB.507691.100040		36	28	8								2	1	028-099	30	10		23	41	16	70	29	35	8	22	18	11	6	55	14	50	7	26	84		9		15	5	46	3	38	20	62	17	21	34	4
TcCLB.506683.190		36	28	8								2	1	028-099	30	10		23	41	16	70	29	35	8	22	18	11	6	55	14	50	7	26	84		9		15	5	46	3	38	20	62	17	21	34	4
TcCLB.509905.1000200		36	28	8								2	1	28	30	10		23	41	16		29	35	8	22	18	11	6	55	14	50	7	26	84		9		15	5	46	3	38	20	62	17	21	34	4	43
TcCLB.508139.250		36	28	8								2	1	28	30	10		23	41	16		29	35	8	22	18	11	6	55	14	50	7	26	84		9		15	5	46	3	38	20	62	17	21	34	4	43
TcCLB.508139.240		36	28	8								2	1	28	30	10		23	41	16		29	35	8	22	18	11	6	55	14	50	7	26	84		9		15	5	46	3	38	20	62	17	21	34	4	43
TcCLB.508143.50		36	28	8								2	1	28	30	10	72	23	41	16	70	29	35	8	22	18	11	6	55	14	50	7	26	84		9		15	5	19	3	38	20	62		21	34	4	43
TcCLB.508451.60		36	28	8								2	1	28	30	10	72	23	41	16		29	35	8	22	18	11	6	55	14	50	7	26	84		9		15	5	46	3	38	20		17	21	34	4	43
TcCLB.509921.20		36	28	8								2	1	28	30	10		23	41	16	70	29	35	8	22	18	11	6	55	14	50	7	26	84		9		15	5	46	3	38	20	62	17	21	34	4	43
TcCLB.509077.20		36	28	8								2	1	28	30	10		23	41	16		29	35	8	22	18	11	6	55	14	50	7	26	84		9		15	5	46	3	38	20	62	17	21	34	4	43
TcCLB.511219.40		36	28	8								2	1	28	30	10		23	41	16		29	35	8	22	18	11	6	55	14	50	7	26	84		9		15	5	46	3	38	20	62	17	21	34	4	43
TcCLB.511787.20		36	28	8								2	1	28	30	10	72	23	41	16	70	29	35	8	22	18	11	6	55	14	50	7	26			9		15	5	46	3	38	20	62	17	21	34	4	43
TcCLB.511551.10		36	28	8								2	1	28	30	10		23	41	16		29	35	8	22	18	11	6	55	14	50	7	26	84		9		15	5	46	3	38	20	62	17	21	34	4	43
TcCLB.509875.80		36	28	8								2	1	28	30	10		23	41	16		29	35	8	22	18	11	6	55	14	50	7	26	84		9		15	5	46	3	38	20	62	17	21	34	4	43
TcCLB.511171.40		36	28	8								2	1	28	30	10	72	23	41	16	70	29	35	8	22	18	11	6	55	14	50	7	26	84		9		15	5	46	3	38	20	62	17	21	34	4	43
TcCLB.508485.10		36	28	8								2	1	28	30	10		23	41	16		29	35	8	22	18	11	6	55	14	50	7	26	84		9		15	5	46	3	38	20	62	17	21	34	4	43
TcCLB.508991.30		36	27	9								2	1	028-099	30	10		23	41	16	70	29	35	8	22	18	11	6	55	14	50	7	26	84		9		15	5	46	3	38	20		17		34	4	43
TcCLB.508563.20		36	27	9								2	1	028-099	30	10		23	41	16	70	29	35	8	22	18	11	6	55	14	50	7	26	84		9		15	5	46	3	38	20		17		34	4	43
TcCLB.509411.10		36	27	9								2	1	028-099	30	10		23	41	16	70	29	35	8	22	18	11	6	55	14	50	7	26	84		9		15	5	46	3	38	20		17		34	4	43
TcCLB.506783.20		36	27	9								2	1	28	30	10	72	23	41	16	70		35	8	22	18	11	6	55	14	50	7	26	84		9		15	5	46	3	38	20	62	17	21	34	4	43
TcCLB.510627.1000200		36	27	9								2	1	28	30	10	72	23	41	16	70	29	35	8	22		11	6	55	14	50	7	26	84		9		15	5	46	3	38	20	62	17	21	34	4	43
TcCLB.511911.10		36	27	9								2	1	28	30	10	72	23	41	16		29	35	8	22	18	11	6	55	14	50	7	26	84		9		15	5	46	3	38	20	62	17	21	34	4	43
TcCLB.510463.1000211		36	27	9								2	1	28	30	10	72	23	41	16	70	29	35	8	22		11	6	55	14	50	7	26	84		9		15	5	46	3	38	20	62	17	21	34	4	43
TcCLB.508163.1000380		36	27	9								2	1	28	30	10	72	23		16	70	29	35	8	22	18	11	6	55	14	50	7	26	84		9		15	5	46	3	38	20	62	17	21	34	4	43
TcCLB.510387.60		36	27	9								2	1	28	30	10	72	23	41	16	70	29	35	8	22		11	6	55	14	50	7	26	84		9		15	5	46	3	38	20	62	17	21	34	4	43
TcCLB.510463.1000180		36	27	9								2	1		30	10	72	23	41	16	70	29	35	8	22	18	11	6	55	14	50	7	26	84		9		15	5	46	3	38	20	62	17	21	34	4	43
TcCLB.510623.80		36	27	9									1	28	30	10	72	23	41	16	70	29	35	8	22	18	11	6	55	14	50	7	26	84		9		15	5	46	3	38	20	62	17	21	34	4	43
TcCLB.506671.50		36	27	9								2	1	28	30	10	72	23		16	70	29	35	8	22	18	11	6	55	14	50	7	26	84		9		15	5	46	3	38	20	62	17	21	34	4	43
TcCLB.505597.20001		36	27	9								2	1	28	30	10	72	23	41	16	70	29	35	8	22	18	11	6	55	14	50	7	26	84		9		15	5	46	3	38	20	62	17	21	34		43
TcCLB.510461.20		36	27	9								2	1	28	30	10	72	23	41	16	70	29	35	8	22		11	6	55	14	50	7	26	84		9		15	5	46	3	38	20	62	17	21	34	4	43
TcCLB.509265.90		36	27	9								2	1		30	10		23	41	16		29	35	8	22	18	11	6	55	14	50	7	26	84		9		15	5	46	3	38	20	62	17	21	34	4	43
TcCLB.508291.50		36	27	9								2	1	28	30	10	72	23	41	16	70		35	8	22		11	6	55	14	50	7	26	84		9		15	5	46	3	38	20	62	17	21	34	4	43
TcCLB.509419.230		36	27	9								2	1		30	10	72	23	41	16	70	29	35	8	22	18	11	6	55	14	50	7	26	84		9		15	5	46	3	38	20	62	17	21	34	4	43
TcCLB.511875.20		36	26	10							089-067	2	1	28	87	10	54	96		16	90	29	35	8	68	18	11	37		14	36	7		27		9		15	5	19	3	31	20		17	93	12	4	48
TcCLB.507167.1000140		36	26	10								2	1	28	87	10	32	88		16	90	29	35	8	68	18	11	37		14	36	7		27		9	82	15	5	19	3	31	20		17	93	12	4	48
TcCLB.408081.20001		36	26	10										028-099	30	10		23	41	16	70	29	35	8	22	18	11	6	55	14	50	7	26	84		9		15	5	46	3	38	20	62	17	21	34	4	43
TcCLB.398477.10		36	26	10								2	1	28	30	10		23	41	016-060		29	35	8	22	18	11	6	55	14	50	7	26	84		9		15	5	46	3	38		62	17	21	34	4	43
TcCLB.510271.30		35	30	5												10	32	56	74	16		29	35	8	47	18	11	6		78	36	7	44	27	77	9	40	15	5	19	3	31	20	61	17	21	12	4	48
TcCLB.509765.129		35	30	5								2	1	28	30	10		23	41	16		29	35	8	22	18	11	6	55	14	50	7	26	84		9		15	5	46	3	38	20	62	17	21	12	4	48
TcCLB.506595.100040		35	29	6								2	1	28	30	10		23	41	16		29	35	8	22	18	11	6	55	14	50	7	26	84		9		15	5	46	3	38	20	62	17	21	12	4
TcCLB.483717.20001		35	29	6				85			67	2	1	028-095		10	42	86						8	83	18	11	6		14	36	7	26			9	82	15	5	19	3	89	20		17	21	12	4	48
TcCLB.504145.10		35	29	6								2	1	28	30	10		23	41	16		29	35	8	22	18	11	6	55	14	50	7	26	84		9		15	5	46	3	38	20	62	17	21	12	4	43
TcCLB.510197.229		35	29	6								2	1	28	60	10	32	56	74	16		29	35	8	22	18	11	6	49	78	36	7	44	27	77	9	40	15	5	19	3	31	20	61	17	21	12
TcCLB.505779.10		35	29	6								2	1	28	30	10		23	41	16	70	29	35	8	22	18	11	6	55	14		7	26	84		9		15	5	46	3	38	20	62	17	21	34	4	43
TcCLB.506803.20		35	29	6								2	1	28	30	10		23	41	16		29	35	8	22	18	11	6	55	14	50	7	26	84		9		15	5	46	3	38	20	62	17	21	12	4
TcCLB.509163.100030		35	29	6								2	1	28	30	10		23	41	16		29	35	8	22	18	11	6	55	14	50	7	26	84		9		15	5	46	3	38	20	62	17	21	12	4
TcCLB.505919.20		35	29	6								2	1	28	30	10		23	41	16		29	35	8	22	18	11	6	55	14	50	7	26	84		9		15	5	46	3	38	20	62	17	21	12	4
TcCLB.506471.30		35	29	6								2	1	28	30	10		23	41	16		29	35	8	22	18	11	6	55	14	50	7	26	84		9		15	5	46	3	38	20	62	17	21	12	4
TcCLB.504099.50		35	29	6								2	1	28	30	10	72	23	41	16		29	35	8	22	18	11	6	55	14	50	7	26	84		9		15	5	46	3	38	20	62	17	21	12	4
TcCLB.510817.50		35	29	6								2	1	28	30	10		23	41	16		29	35	8	22	18	11	6	55	14	50	7	26	84		9		15	5	46	3	38	20	62	17	21	12	4
TcCLB.420293.20		35	29	6								2	1	28	30	10		23	41	16		29	35	8	22	18	11	6	55	14	50	7	26	84		9		15	5	46	3	38	20	62	17	21	12	4
TcCLB.509427.60		35	29	6								2	1	28	30	10		23	41	16		29	35	8	22	18	11	6	55	14	50	7	26	84		9		15	5	46	3	38	20	62	17	21	12	4
TcCLB.509287.170		35	29	6								2	1	28	60	10				16		29	35	8	47	18	11	6	49	78	36	7	44	27	77		40	15	5	19	3	31	20	61	17	21	12	4
TcCLB.454391.10		35	29	6								2	1	28	30	10		23	41	16		29	35	8	22	18	11	6	55	14	50	7	26	84		9		15	5	46	3	38	20	62	17	21	12	4
TcCLB.508147.100070		35	29	6								2	1	28	60	10		56		16		29	35	8	22	18	11	6	49	78	36	7	44	27	77	9	40	15	5	19	3	31	20	61	17		12	4
TcCLB.510175.1000110		35	29	6								2	1	28	30	10		23	41	16		29	35	8	22	18	11	6	55	14	50	7	26	84		9		15	5	46	3	38	20	62	17	21	12	4
TcCLB.507213.40		35	29	6								2	1	28	30	10		23	41	16		29	35	8	22	18	11	6	55	14	50	7	26	84		9		15	5	46	3	38	20	62	17	21	12	4
TcCLB.508163.210		35	29	6										28	60	10	32	56		16		29		8	47	18	11	6		78	36	7	44	27	77	9	40	15	5	19	3	31	20	61	17	21	12	4	48
TcCLB.504769.100		35	29	6								2	1	28	30	10		23	41	16		29	35	8	22	18	11	6	55	14	50	7	26	84		9		15	5	46	3	38	20	62	17	21	12	4
TcCLB.410895.20001		35	28	7								2	1	28	30	10		23	41	16		29	35	8	22	18	11	6	55	14	50	7	26	84		9		15	5	46	3	38	20	62	17	21	12	4
TcCLB.508325.1000290		35	28	7								2	1	28	30	010-027		23	41	16		29	35	8	22	18	11	6	55	14	50	7	26	84		9		15	5	46	3	38	20	62	17	21	12	4
TcCLB.506353.10		35	28	7								2	1	028-099	30	10		23	41	16		29	35	8	22	18	11	6	55	14	50	7	26	84		9		15	5	46	3	38	20	62	17	21	12	4	43
TcCLB.508163.170		35	28	7								2	1	28	30	10	72	23	41	16	70	29	35	8	22	18	11	6	55	14	50	7	26	84		9		15	5	46	3	38	20	62	17	21	34	4
TcCLB.503447.20		35	28	7								2	1	28	30	10		23	41	16		29	35	8	22	18	11	6	55	14	50	7	26	84		9		15	5	46	3	38	20	62	17	21	34	4	43
TcCLB.506397.10		35	28	7								2	1	28	30	10		23	41	16		29	35	8	22	18	11	6	55	14	50	7	26	84		9		15	5	46	3	38	20	62	17	21	34	4	43
TcCLB.509533.10		35	28	7								2	1	28	30	10	72	23	41	16		29	35	8	22	18	11	6	55	14	50	7	26	84		9		15	5	46	3	38	20		17	21	34	4
TcCLB.510543.70		35	28	7								2	1	28	30	10	72	23	41	16		29	35	8	22	18	11	6	55	14	50	7	26	84		9		15	5	46	3	38	20		17	21	34	4
TcCLB.508325.250		35	28	7								2	1	28	30	10		23	41	16		29	35	8	22	18	11	6	55	14	50	7	26	84		9		15	5	46	3	38	20	62	17	21	34	4
TcCLB.506331.130		35	28	7								2	1	28	30	10		23	41	16		29	35	8	22	18	11	6	55	14	50	7	26	84		9		15	5	46	3	38	20		17	21	34	4	43
TcCLB.507949.210		35	28	7								2	1	28	30	10		23	41	16		29	35	8	22	18	11	6	55	14	50	7	26	84		9		15	5	46	3	38	20	62	17	21	34	4	43
TcCLB.506717.1000130		35	28	7								2	1		60	10	32	56	74	16		29		8	47	18	11	6		78	36	7	44	27	77	9	40	15	5	19	3	31	20	61	17	21	12	4
TcCLB.509905.150		35	28	7								2	1	28	30	10		23	41	16		29	35	8	22	18	11	6	55	14	50	7	26	84		9		15	5	46	3	38	20	62	17	21	34	4
TcCLB.463279.20		35	28	7								2	1	28	30	10		23	41	16		29	35	8	22	18	11	6	55	14	50	7	26	84		9		15	5	46	3	38	20		17	21	34	4	43
TcCLB.508289.100080		35	28	7								2	1	28	30	10	72	23	41	16	70	29	35	8	22	18	11	6	55	14	50	7	26	84		9		15	5	46	3	38	20	62	17	21	34	4
TcCLB.509281.20		35	28	7									1	28	30	10		23	41	16		29	35	8	22	18	11	6	55	14	50	7	26	84		9		15	5	46	3	38	20	62	17	21	12	4	43
TcCLB.504637.21		35	28	7								2	1	28	30	10	72	23		16	70	29	35	8	22	18	11	6	55	14	50	7	26			9		15	5	19	3	38	20	62	17	21	34	4	43
TcCLB.509427.10		35	28	7								2	1	28	30	10		23	41	16		29	35	8	22	18	11	6	55	14	50	7	26	84		9		15	5	46	3	38	20	62	17	21	34	4
TcCLB.485713.20001		35	28	7								2	1	28	30	10		23	41	16		29	35	8	22	18	11	6	55	14	50	7	26	84		9		15	5	46	3	38	20	62	17	21	34	4	43
TcCLB.504581.20001		35	28	7								2	1	28	30	10		23	41	16		29	35	8	22	18	11	6	55	14	50	7	26	84		9		15	5	46	3	38	20	62	17	21	34	4
TcCLB.508367.100070		35	28	7								2	1	28	30	10		23	41	16		29	35	8	22	18	11	6	55	14	50	7	26	84		9		15	5	46	3	38	20		17	21	34	4	43
TcCLB.427533.20001		35	28	7												10	32	56	74	16		29	35	8	47	18	11	6	49	14	36	7	44	27		9	40	15	5	19	3	31	20	61	17	21	12	4	48
TcCLB.506021.20		35	28	7								2	1	28	30	10		23	41	16		29	35	8	22	18	11	6	55	14	50	7	26	84		9		15	5	46	3	38	20		17	21	34	4	43
TcCLB.511891.10		35	28	7								2	1	28	30	10		23	41	16		29	35	8	22	18	11	6	55	14	50	7	26	84		9		15	5	46	3	38	20	62	17	21	34	4
TcCLB.504313.10		35	28	7							67	2	1	95		10	42	86						8	83	18	11	6	49	14	36	7	26			9	82	15	5	19	3	89	20		17	21	12	4	48
TcCLB.510853.40		35	27	8								2	1	028-095		10	42	86						8	83	18	11	6	49	14	36	7	26			9	82	15	5	19	3	89	20		17	21	12	4	048-064-064
TcCLB.507479.70		35	27	8								2	1	028-095		10	42	86						8	83	18	11	6	49	14	36	7	26			9	82	15	5	19	3	89	20		17	21	12	4	048-064-064
TcCLB.509875.100030		35	27	8								2	1	028-095		10	42	86						8	83	18	11	6	49	14	36	7	26			9	82	15	5	19	3	89	20		17	21	12	4	048-064
TcCLB.509437.160		35	27	8								2	1	028-095		10	42	86						8	83	18	11	6	49	14	36	7	26			9	82	15	5	19	3	89	20		17	21	12	4	048-064
TcCLB.504579.20		35	27	8								2	1	028-099	30	10	072-016		41	16	70	29	35	8	22	18	11	6	55	14	50	7	26	84		9		15	5	46	3	38	20	62	17	21	12	4
TcCLB.506537.1000100		35	27	8								2	1	028-099	30	10	72	23	41	16	70	29	35	8	22		11	6	55	14	50	7	26	84		9		15	5	46	3	38	20	62	17	21	12	4
TcCLB.509019.100010		35	27	8								2	1	028-099	30	10	72		41	16	70	29	35	8	22	18	11	6	55	14	50	7	26	84		9		15	5	46	3	38	20	62	17	21	12	4
TcCLB.510643.1000100		35	27	8								2	1	028-099	30	10		23	41	16		29	35	8	22	18	11	6	55	14	50	7	26	84		9		15	5	46	3	38	20	62	17	21	34	4	43
TcCLB.505609.40		35	27	8								2	1		60	10	32	56	74	16		29		8	47	18	11	6	49	78	36	7	44	27	77	9	40	15	5	19	3	31	20	61	17	21	12	4
TcCLB.510553.100020		35	27	8								2	1	28	30	10	72	23		16	70	29	35	8	22	18	11	6	55	14	50	7	26	84		9		15	5	46	3	38	20	62	17	21	34	4
TcCLB.510769.170		35	27	8								2	1	28	30	10		23	41	16			35	8	22	18	11	6	55	14	50	7	26			9		15	5	46	3	38	20	62	17	21	34	4	43
TcCLB.505207.10		35	26	9								2	1		87	10	54	96		16	90	29	35	8	68	18	11	37		14	36	7		27		9	82	15	5	19	3	31	20		17	93	12	4	48
TcCLB.506331.1000200		35	26	9								2	1	28	87	10	54	96		16	90	29	35	8	68	18	11	37		14	36	7		27		9		15	5	19	3	31	20		17	93	12	4	48
TcCLB.507121.20		35	26	9								2	1		87	10	54	96		16	90	29	35	8	68	18	11	37		14	36	7		27		9	82	15	5	19	3	31	20		17	93	12	4	48
TcCLB.505407.20001		35	26	9									1	028-099	30	10		23	41	16	70	29	35	8	22	18	11	6	55	14	50	7	26	84		9		15	5	46	3	38	20		17		34	4	43
TcCLB.508431.80		35	26	9								2	1	28	30	10	72	23		16	70	29	35	8	22		11	6	55	14	50	7	26	84		9		15	5	46	3	38	20	62	17	21	34	4	43
TcCLB.508261.1000150		35	26	9								2	1	28		10	72	23	41	16	70	29	35	8	22	18	11	6	55	14	50	7	26	84		9		15	5	46	3	38	20	62	17		34	4	43
TcCLB.507729.30		35	26	9								2	1	28		10	72	23		16	70	29	35	8	22	18	11	6	55	14	50	7	26	84		9		15	5	46	3	38	20	62	17	21	34	4	43
TcCLB.505187.20001		35	26	9										28	30	10		23	41	16	70	29	35	8	22	18	11	6	55	14	50	7	26	84		9		15	5	46	3	38	20	62	17		34	4	43
TcCLB.511311.30		35	26	9										28	30	10	72	23	41	16		29	35	8	22	18	11	6	55	14	50	7	26	84		9		15	5	46	3	38	20	62	17	21	34	4	43
TcCLB.509195.80		35	26	9										28	30	10	72	23	41	16	70	29	35	8	22	18	11	6	55	14	50	7	26	84		9		15	5	46	3	38	20	62	17	21	34	4	43
TcCLB.510543.100030		35	25	10								2	1		87	10	32	88		16	90	29	35	8	68	18	11	37		14	36	7		27		9	82	15	5	19	3	31	20		17	93	12	4	48
TcCLB.510631.20		35	24	11								2			87	10	32	88		16	90	29	35	8	68	18	11	37		14	36	7		27		9	82	15	5	19	3	31	20		17	93	12	4	48
TcCLB.507549.20		35	23	12												089-010	32	88		16	90		35	8	68	18	11	37		14	36	7		27		9	82	15	5	19	3	31	20		17	93	12	4	48
TcCLB.503767.10		34	29	5								2	1	28	30	10		23	41	16		29	35	8	22	18	11	6	55	14	50	7	26	84		9		15	5	46	3	38	20	62	17	21	12	4
TcCLB.511917.10		34	29	5														56		16		29	35	8	47	18	11	6	49	78	36	7	44	27	77	9	40	15	5	19	3	31	20	61	17	21	12	4	48
TcCLB.508837.70		34	29	5								2	1	28	30	10		23	41	16		29	35	8	22	18	11	6	55	14	50	7	26	84		9		15	5	46	3	38	20	62	17	21	12	4
TcCLB.503955.40		34	29	5								2	1	28	30	10		23	41	16		29	35	8	22	18	11	6	55	14	50	7	26	84		9		15	5	46	3	38	20	62	17	21	12	4
TcCLB.510397.100020		34	29	5								2	1	28	30	10		23	41	16		29	35	8	22	18	11	6	55	14	50	7	26	84		9		15		19	3	38	20	62	17	21	12	4
TcCLB.508139.130		34	29	5								2	1	28	30	10		23	41	16		29	35	8	22	18	11	6	55	14	50	7	26	84		9		15	5	46	3	38	20	62	17	21	12	4
TcCLB.509287.230		34	29	5								2	1	28	30	10		23	41	16		29	35	8	22	18	11	6	55	14	50	7	26	84		9		15	5	46	3	38	20	62	17	21	12	4
TcCLB.509257.10		34	29	5								2	1	28	30	10		23	41	16	70	29	35	8	22	18	11	6	55	14	50	7	26	84		9		15	5	46	3	38	20	62	17	21	12	4
TcCLB.509777.30		34	29	5								2	1	28	30	10		23	41	16		29	35	8	22	18	11	6	55	14	50	7	26	84		9		15	5	46	3	38	20	62	17	21	12	4
TcCLB.509817.40		34	28	6							089-067	2	1	28	30	10		23	41	16		29	35	8	22	18	11	6	55	14	50	7	26	84		9		15	5	46	3	38	20	62	17	21	12	4
TcCLB.509735.100		34	28	6								2	1	28	30	10		23	41	16		29	35	8	22	18	11	6	55	14	50	7	26	84		9		15	5	46	3	38	20	62	17	21		4
TcCLB.398009.100020		34	28	6								2	1	28	30	10		23	41	16		29	35	8	22	18	11	6	55	14	50	7	26	84		9		15		46	3	38	20	62	17	21	12	4
TcCLB.509075.50		34	28	6								2	1	28	30	10		23	41	16		29	35	8	22	18	11	6	55	14	50	7	26	84		9		15	5	46	3	38	20	62	17	21	34	4
TcCLB.508023.100060		34	28	6								2	1	28	30	10	72	23	41	16		29	35	8	22	18	11	6	55	14	50	7	26	84		9		15	5	46	3	38	20		17	21	34	4
TcCLB.503937.100040		34	28	6								2	1	28	30	10		23	41	16		29	35	8	22	18	11	6	55	14	50	7	26	84		9		15	5	46	3	38	20	62	17	21		4
TcCLB.507907.20		34	28	6								2	1	28	30	10		23	41	16		29	35	8	22	18	11	6	55	14	50	7	26	84		9		15	5	46	3	38	20		17	21	34	4
TcCLB.506751.50		34	28	6								2	1	28	30	10		23	41	16		29	35	8	22	18	11	6	55	14	50	7	26	84		9		15	5	46	3	38	20	62	17	21	34	4
TcCLB.484137.20001		34	28	6								2	1	28	30	10		23	41	16		29	35	8	22	18	11	6	55	14	50	7	26	84		9		15	5	46	3	38	20	62	17	21	12	4
TcCLB.508963.100040		34	28	6								2	1	28	30	10		23	41	16		29	35	8	22	18	11	6	55	14	50	7	26	84		9		15	5	46	3	38	20	62	17	21	12	4
TcCLB.480289.20001		34	28	6								2	1	28	60	10	32	56	74	16		29	35	8	47	18	11	6		78	36	7	44	27	77	9	40	15	5	19	3	31	20	61	17	21	12
TcCLB.506331.1000120		34	28	6								2	1	28	30	10		23	41	16		29	35	8	22	18	11	6	55	14	50	7	26	84		9		15	5	46	3	38	20		17	21	34	4
TcCLB.508607.100070		34	28	6								2	1	28	30	10		23	41	16		29	35	8	22	18	11	6	55	14	50	7	26	84		9		15	5	46	3	38	20	62	17	21	12	4
TcCLB.510359.610		34	28	6								2	1	28	30	10		23	41	16		29	35	8	22	18	11	6	55	14	50	7	26	84		9		15	5	46	3	38	20	62	17	21	34	4
TcCLB.508325.100080		34	28	6								2	1	28	30	10		23	41	16		29	35	8	22	18	11	6	55	14	50	7	26	84		9		15	5	46	3	38	20	62	17	21	12	4
TcCLB.504945.20001		34	28	6							67	2	1	28	30	10		23	41	16		29	35	8	22	18	11	6	55	14	50	7	26	84		9		15	5	46	3	38	20	62	17	21	34	4
TcCLB.402753.20001		34	28	6							67	2	1	28	30	10		23		16		29	35	8	22	18	11	6	55	14	50	7		84		9		15	5	46	3	38	20	62	17	21	12	4
TcCLB.507881.90		34	28	6								2	1	28	30	10		23	41	16		29	35	8	22	18	11	6	55	14	50	7	26	84		9			5	46	3	38	20	62	17	21	12	4
TcCLB.506443.100		34	27	7								2	1	028-095		10	42	86						8	83	18	11	6		14	36	7	26			9	82	15	5	19	3	89	20		17	21	12	4	048-064
TcCLB.508677.30		34	27	7								2	1	028-095		10	42	86						8	83	18	11	6		14	36	7	26			9	82	15	5	19	3	89	20		17	21	12	4	048-064
TcCLB.506183.90		34	27	7								2	1	028-095		10	42	86						8	83	18	11	6		14	36	7	26			9	82	15	5	19	3	89	20		17	21	12	4	048-064
TcCLB.508023.100		34	27	7								2	1	028-095		10	42	86						8	83	18	11	6		14	36	7	26			9	82	15	5	19	3	89	20		17	21	12	4	048-064
TcCLB.503447.50		34	27	7								2	1	028-095		10	42	86						8	83	18	11	6	49	14	36	7	26			9	82	15	5	19	3	89	20		17	21	12	4	48
TcCLB.511585.230		34	27	7								2	1	28	30	10		23	41	016-020		29	35	8	22	18	11	6	55	14	50	7	26	84		9		15	5	46	3	38	20		17	21	34	4
TcCLB.506053.50		34	27	7								2	1	028-095		10	42	86						8	83	18	11	6	49	14	36	7	26			9	82	15	5	19	3	89	20		17	21	12	4	48
TcCLB.503545.100010		34	27	7								2	1	028-099	30	10		23	41	16	70	29	35	8	22	18	11	6	55	14	50	7	26	84		9		15	5	46	3	38	20		17	21		4	43
TcCLB.504533.40		34	27	7								2	1	028-095		10	42	86						8	83	18	11	6	49	14	36	7	26			9	82	15	5	19	3	89	20		17	21	12	4	48
TcCLB.510503.70		34	27	7								2	1	028-095		10	42	86						8	83	18	11	6	49	14	36	7	26			9	82	15	5	19	3	89	20		17	21	12	4	48
TcCLB.507773.10		34	27	7								2	1	028-095		10	42	86						8	83	18	11	6	49	14	36	7	26			9	82	15	5	19	3	89	20		17	21	12	4	48
TcCLB.511117.30		34	27	7								2	1	28	30	10		23	41	016-020		29	35	8	22	18	11	6	55	14	50	7	26	84		9		15	5	46	3	38	20		17	21	34	4	43
TcCLB.411461.20001		34	27	7							67	2	001-099		30	10	72	23	41	16	70	29	35	8	22		11	6	55	14	50	7	26	84		9		15	5	46	3	38	20	62	17	21	12	4
TcCLB.508633.1000120		34	27	7								2	1	28	30	10	72		41	16	70	29	35	8	22	18	11	6	55	14	50	7	26	84		9		15	5	46	3	38	20		17	21		4	43
TcCLB.511345.30		34	27	7								2	1	28	30	10	72		41	16	70	29	35	8	22	18	11	6	55	14		7	26	84		9		15	5	46	3	38	20	62	17	21		4	43
TcCLB.506129.30		34	27	7								2	1		30	10		23	41	16		29	35	8	22	18	11	6	55	14	50	7	26	84		9		15	5	46	3	38	20	62	17	21	34	4
TcCLB.422867.10		34	27	7									1	28	30	10	72	23	41	16		29	35	8	22	18	11	6	55	14	50	7	26	84		9		15	5	46	3	38	20	62	17	21	34	4
TcCLB.511835.10		34	26	8								2	1	028-089		10	32			16		29		8	68	18	11	37		14	36	7		27		9	82	15	5	19	3	31	20		17	93	12	4	48
TcCLB.508481.10		34	26	8								2	1	028-095		10	42	86						8	83	18	11	6	49	14	36	7	26			9	82	15	5	19	3	89	20		17	21	12	4	48
TcCLB.511671.20		34	26	8								2	1	028-095		10	42	86						8	83	18	11	6	49	14	36	7	26			9	82	15	5	19	3	89	20		17	21	12	4	048-064
TcCLB.504869.20001		34	26	8								2	1	028-095			42	86						8	83	18	11	6	49	14	36	7	26			9	82	15	5	19	3	89	20		17	21	12	4	048-064
TcCLB.511547.20		34	26	8								2	1	028-095		10	42	86						8	83	18	11	6	49	14	36	7	26			9	82	15	5	19	3	89	20		17	21	12	4	48
TcCLB.508935.10		34	26	8								2	1	95		10	42	86						8	83	18	11	6	49	14	36	7	26			9	82	15	5	19	3	89	20		17	21	12	4	048-064
TcCLB.508593.20		34	26	8								2	1	95		10	42	86						8	83	18	11	6	49	14	36	7	26			9	82	15	5	19	3	89	20		17	21	12	4	048-018
TcCLB.508593.10		34	26	8								2	1	95		10	42	86						8	83	18	11	6	49	14	36	7	26			9	82	15	5	19	3	89	20		17	21	12	4	048-018
TcCLB.507233.70		34	26	8										28	30	10	72	23	41	16	70	29	35	8	22	18	11	6	55	14	50	7	26	84		9		15	5	46	3	38	20	62	17	21	34	4	43
TcCLB.511569.30		34	26	8											30	10		23	41	16	70	29	35	8	22	18	11	6	55	14	50	7	26	84		9		15	5	46	3	38	20	62	17	21	34	4	43
TcCLB.508581.40		34	26	8										28	30	10		23	41	16		29	35	8	22	18	11	6	55	14	50	7	26	84		9		15	5	46	3	38	20	62	17	21	34	4	43
TcCLB.507473.30		34	26	8										28	30	10		23	41	16		29	35	8	22	18	11	6	55	14	50	7	26	84		9		15	5	46	3	38	20	62	17	21	34	4	43
TcCLB.511771.40		34	25	9								2	1	028-089		10	54	96		16	90	29	35	8	68	18	11	37		14	36	7		27		9		15	5	19	3	31	20		17	93	12	4	48
TcCLB.510483.360		34	25	9								2	1		87	10	54	96		16	90	29	35	8	68	18	11	37		14	36	7		27		9		15	5	19	3	31	20		17	93	12	4	48
TcCLB.506091.20001		34	25	9								2	1	28	87	10	54	96		16	90	29	35	8	68	18	11	37		14	36	7		27		9		15	5	19	3	31	20			93	12	4	48
TcCLB.503861.100		34	25	9								2	1		87	10	54	96		16	90	29	35	8	68	18	11	37		14	36	7		27		9		15	5	19	3	31	20		17	93	12	4	48
TcCLB.506813.140		34	25	9								2	1		87	10	54	96		16	90	29	35	8	68	18	11	37		14	36	7		27		9		15	5	19	3	31	20		17	93	12	4	48
TcCLB.510713.30		34	25	9								2	1		87	10	54	96		16	90	29	35	8	68	18	11	37		14	36	7		27		9		15	5	19	3	31	20		17	93	12	4	48
TcCLB.509529.40		34	25	9								2	1	28	87	10	54	96		16	90	29	35	8	68	18	11	37		14	36	7		27		9		15	5	19	3	31	20			93	12	4	48
TcCLB.510635.10		34	25	9								2	1		87	10	54	96		16	90	29	35	8	68	18	11	37		14	36	7		27		9		15	5	19	3	31	20		17	93	12	4	48
TcCLB.507875.70		34	25	9								2	1	28	87	10	54	96		16	90	29	35	8	68	18	11	37		14	36	7		27		9		15	5	19	3	31	20			93	12	4	48
TcCLB.508071.20		34	25	9								2	1		87	10	54	96		16	90	29	35	8	68	18	11	37		14	36	7		27		9		15	5	19	3	31	20		17	93	12	4	48
TcCLB.506245.1000140		34	25	9								2	1		87	10	54	96		16	90	29	35	8	68	18	11	37		14	36	7		27		9		15	5	19	3	31	20		17	93	12	4	48
TcCLB.510497.170		34	25	9								2	1		87	10	54	96		16	90	29	35	8	68	18	11	37		14	36	7		27		9		15	5	19	3	31	20		17	93	12	4	48
TcCLB.508581.10		34	25	9								2	1	28	87	10	54	96		16	90	29	35	8	68	18	11	37		14	36	7		27		9		15	5	19	3	31	20			93	12	4	48
TcCLB.508221.20		34	25	9											30	10	72	23	41	16	70	29	35	8	22	18	11	6	55	14	50	7	26	84		9		15	5	46	3	38	20	62	17	21	34	4	43
TcCLB.506451.50		34	25	9											30	10	72	23	41	16	70	29	35	8	22	18	11	6	55	14	50	7	26	84		9		15	5	46	3	38	20	62	17	21	34	4	43
TcCLB.509631.120		34	25	9										28	30	10	72	23	41	16		29	35	8	22	18	11	6	55	14	50	7	26	84		9		15	5	46		38	20	62	17	21	34	4	43
TcCLB.508873.90		34	25	9											30	10	72	23	41	16	70	29	35	8	22	18	11	6	55	14	50	7	26	84		9		15	5	46	3	38	20	62	17	21	34	4	43
TcCLB.503973.20		34	25	9								2			30	10	72		41	16	70	29	35	8	22	18	11	6	55	14	50	7	26	84		9		15	5	46	3	38	20	62	17	21	34	4	43
TcCLB.511451.1000100		34	25	9								2	1	28	30	10	72	23		16	70	29	35	8	22		11	6	55	14	50	7	26	84		9		15	5	46	3	38		62	17	21	34	4	43
TcCLB.475569.20001		34	25	9											30	10	72	23	41	16	70	29	35	8	22	18	11	6	55	14	50	7	26	84		9		15	5	46	3	38	20	62	17	21	34	4	43
TcCLB.510629.80		34	25	9										28	30	10	72	23	41	16	70	29	35	8	22	18	11	6	55	14	50	7	26	84		9		15	5	46	3	38	20	62		21	34	4	43
TcCLB.511861.100014		34	25	9											30	10	72	23	41	16	70	29	35	8	22	18	11	6	55	14	50	7	26	84		9		15	5	46	3	38	20	62	17	21	34	4	43
TcCLB.506653.40		34	25	9											30	10	72	23	41	16	70	29	35	8	22	18	11	6	55	14	50	7	26	84		9		15	5	46	3	38	20	62	17	21	34	4	43
TcCLB.509217.60		34	25	9											30	10	72	23	41	16	70	29	35	8	22		11	6	55	14	50	7	26	84		9		15	5	46	3	38	20	62	17	21	34	4	43
TcCLB.508163.90		34	25	9								2	1	28	30	10	72	23		16	70	29	35	8	22		11	6	55	14	50	7	26	84		9		15	5	46	3	38	20	62	17		34	4	43
TcCLB.511183.170		34	25	9											30	10	72	23	41	16	70	29	35	8	22	18	11	6	55	14	50	7	26	84		9		15	5	46	3	38	20	62	17	21	34	4	43
TcCLB.508081.110		34	25	9											30	10	72	23	41	16	70	29	35	8	22	18	11	6	55	14	50	7	26	84		9		15	5	46	3	38	20	62	17	21	34	4	43
TcCLB.506603.100035		34	25	9											30	10	72	23	41	16	70	29	35	8	22	18	11	6	55	14	50	7	26	84		9		15	5	46	3	38	20	62	17	21	34	4	43
TcCLB.504333.20		34	23	11																16	90	29	35	8	68	18	11	37		14	36	7	44	27		9	82	15	5	19	3	31	20		17	93	12	4	48
TcCLB.474185.20001		33	30	3	66						67	2	1	28	30	10		23	41	16		29	35	8	22	18	11	6	55	14	50	7	26	84		9		15	5	46	3		20		17	21	12	4
TcCLB.454403.10		33	29	4								2	1	28	30	10	72	23	41	16		29	35	8	22	18	11	6	55	14	50	7	26			9		15	5	46	3	38	20		17	21	12	4
TcCLB.506595.120		33	29	4								2	1	28	30	10		23	41	16		29	35	8	22	18	11	6	55	14	50	7	26			9		15	5	46	3	38	20	62	17	21	12	4
TcCLB.510543.1000200		33	29	4								2	1	28	30	10		23	41	16		29	35	8	22	18	11	6	55	14	50	7	26			9		15	5	46	3	38	20	62	17	21	12	4
TcCLB.511259.230		33	28	5								2	1		60	10	32	56		16		29	35	008-078		18	11	6		78		7	44	27	77	9	40	15	5	19	3	31	20	61	17	21	12	4	48
TcCLB.506487.50		33	28	5								2	1	28	30	10		23	41	16	70	29	35	8	22	18	11	6		14	50	7	26			9		15	5	46	3	31	20		17		34	4	43
TcCLB.507063.70		33	28	5								2	1	28	30	10		23	41	16		29	35	8	22	18	11	6		14	50	7	26	84		9		15	5	46	3	38	20	62	17	21	12	4
TcCLB.507167.80		33	28	5								2	1	28	30	10		23	41	16		29	35	8	22	18	11	6	55	14	50	7	26	84		9		15	5	46	3	38	20		17	21	34	4
TcCLB.510607.100070		33	28	5								2	1	28	30	10		23	41	16		29	35	8	22	18	11	6	55	14		7	26	84		9		15	5	46	3	38	20	62	17	21	12	4
TcCLB.507035.80		33	28	5								2	1	28	30	10		23	41	16		29	35	8		18	11	6	55	14	50	7	26	84		9		15	5	46	3	38	20	62	17	21	12	4
TcCLB.505037.70		33	28	5								2	1	28	30	10		23	41	16		29	35	8	22		11	6	55	14	50	7	26	84		9		15	5	19	3	38	20	62	17	21	12	4
TcCLB.510307.230		33	28	5								2	1	28	30	10		23	41	16		29	35	8	22	18	11	6	55	14	50	7	26	84		9		15	5	46	3	38	20		17	21	34	4
TcCLB.511757.70		33	28	5								2	1	28	30	10		23	41	16		29	35	8	22	18	11	6	55	14	50	7	26	84		9		15	5	46	3	38	20		17	21	34	4
TcCLB.508775.100040		33	28	5								2	1	28	30	10		23	41	16		29	35	8	22	18	11	6	55	14		7	26	84		9		15	5	46	3	38	20	62		21	12	4
TcCLB.511311.20		33	28	5								2	1	28	30	10		23	41	16		29	35	8	22	18	11	6	55	14	50	7	26	84		9		15	5	46	3	38	20		17	21	34	4
TcCLB.504229.50		33	28	5								2	1	28	30	10		23	41	16		29	35	8	22	18	11	6	55	14	50	7	26	84		9		15	5	46	3	38	20	62	17	21	12	4
TcCLB.504229.100		33	28	5							67	2	1	28	30	10		23		16		29	35	8	22	18	11	6	55	14		7	26	84		9		15	5	46	3	38	20	62	17		12	4
TcCLB.508789.100		33	27	6								2	1	028-095		10	42	86						8	83	18	11	6	49	14	36	7	26			9		15	5	19	3	89	20		17	21	12	4	48
TcCLB.504069.1000140		33	27	6								2	1	28	30	10		23	41	16		29	35	8	22		11	6	55	14	50	7	26	84		9		15	5	46	3	38	20	62	17	21	12	4
TcCLB.503957.100060		33	27	6								2	1	28	30	10		23	41	16		29	35	8	22	18	11	6	55	14	50	7	26	84		9		15	5	46	3	38	20	62	17	21		4
TcCLB.505779.20		33	27	6										28	30	10		23	41	16	70	29	35	8	22	18	11	6	55	14		7	26	84		9		15	5	46	3	38	20	62	17	21	34	4	43
TcCLB.404845.10		33	27	6													32	56		16		29	35	8	47	18	11	6	49	78	36	7	44	27	77	9	40	15	5	19	3	31	20	61	17	21	12	4	48
TcCLB.509613.20		33	27	6								2	1	28	30	10		23	41	16	70	29	35	8	22	18	11	6	55	14	50	7	26	84		9		15	5	46	3	38	20	62	17	21	34
TcCLB.510441.30		33	27	6								2	1	28	30	10		23	41	16		29	35	8	22			6	55	14	50	7	26	84		9		15	5	46	3	38	20	62	17	21	12	4
TcCLB.507611.70		33	27	6								2	1	28	30	10		23	41	16		29	35	8	22	18	11			14	50	7	26	84		9		15	5	46	3	38	20	62	17	21	12	4
TcCLB.504689.30		33	26	7								2	1	28	30	10		23	41	016-044		29	35	8	22		11	6	55	14	50	7	26	84		9		15	5	46	3	38	20	62	17	21	12	4
TcCLB.507723.50		33	26	7								2	1	028-095		10	42	86						8	83	18	11	6	49	14	36	7	26			009-066		15	5	19	3	89	20		17	21	12	4	48
TcCLB.508023.1000150		33	26	7								2	1	028-099	30	10	072-016		41	16	70	29	35	8	22		11	6	55	14	50	7	26	84		9		15	5	46	3	38	20		17	21	12	4
TcCLB.506951.90		33	26	7								2	1	028-095		10	42	86						8	83	18	11	6	49	14	36	7	26			9		15	5	19	3	89	20		17	21	12	4	48
TcCLB.504341.10		33	26	7								2	1	95		10	42	86						8	83	18	11	6		14	36	7	26			9	82	15	5	19	3	89	20		17	21	12	4	48
TcCLB.511471.100020		33	26	7								2	1	28	30	10		23	041-087				35	8	22	18	11	6	55	14	50	7	26	84		9		15	5	46	3	38	20	62	17	21	12	4
TcCLB.511311.7		33	26	7								2	1	28	30	10	72	23	41	16		29	35	8	22	18	11	6	55	14	50	7	26	84		9		15	5	46	3	38	20	62	17	21	34
TcCLB.507179.10007		33	26	7								2	1	28	30	10	72	23		16	70	29	35	8	22		11	6	55	14	50	7	26	84		9		15	5	19	3	38	20			21	34	4	43
TcCLB.508939.10		33	26	7								2	1	28	30	10	72		41	16		29	35	8	22	18	11	6	55	14	50	7	26	84		9		15	5	46	3	38	20		17	21		4	43
TcCLB.504205.20		33	25	8								2	1	028-095		10	42	86						8	83	18	11	6	49	14	36	7	26			009-066		15	5	19	3	89	20		17	21	12	4	048-064
TcCLB.511887.30		33	25	8								2	1	028-099	30	10	72		41	16	70	29		8	22		11	6	55	14	50	7	26	84		9		15	5	46	3	38	20	62	17	21	12	4
TcCLB.511861.1000130		33	25	8											30	10	72	23	41	16	70	29	35	8	22	18	11	6	55	14	50	7	26	84		9		15	5	46	3	38	20	62	17	21	34	4
TcCLB.506971.30		33	25	8											30	10	72	23	41	16	70	29	35	8	22	18	11	6	55	14	50	7	26			9		15	5	46	3	38	20	62	17	21	34	4	43
TcCLB.510217.70		33	25	8											30	10	72	23	41	16	70	29	35	8	22	18	11	6	55	14	50	7	26	84		9		15	5	46	3	38	20	62	17	21	34	4	43
TcCLB.511183.450		33	25	8											30	10	72	23	41	16	70	29	35	8	22	18	11	6	55	14	50	7	26	84		9		15	5	46	3	38	20	62	17	21	34	4	43
TcCLB.505023.10		33	25	8								2			30	10		23	41	16	70	29	35	8	22	18	11	6		14	50	7	26	84		9		15	5	46	3	38	20	62	17	21	34	4	43
TcCLB.507687.60		33	25	8											30	10	72	23	41	16	70	29	35	8	22	18	11	6	55	14	50	7	26	84		9		15	5	46	3	38	20	62	17	21	34	4	43
TcCLB.503717.130		33	25	8											30	10	72	23	41	16	70	29	35	8	22	18	11	6	55	14	50	7	26	84		9		15	5	46	3	38	20	62	17	21	34	4	43
TcCLB.511377.20		33	25	8											30	10		23	41	16	70	29	35	8	22	18	11	6	55	14	50	7	26	84		9		15	5	46	3	38	20	62	17	21	34	4	43
TcCLB.509225.30		33	25	8											30	10	72	23	41	16	70	29	35	8	22	18	11	6	55	14	50	7	26	84		9		15	5	46	3	38	20	62	17	21	34	4
TcCLB.505833.20001		33	24	9							031-067	2	1	028-089		10	32	56		16		29		8	68	18	11	37		14	36	7		27		9	82	15	5	19	3	31	20		17	93	12	4	48
TcCLB.421173.4		33	24	9								2	1		87	10	54	96		16	90	29	35	8	68	18	11	37		14	36	7		27		9	82	15	5	19	3	31	20		17	93	12	4	48
TcCLB.507643.100060		33	24	9								2	1		87	10	54	96		16	90	29	35	8	68		11	37		14	36	7		27		9		15	5	19	3	31	20		17	93	12	4	48
TcCLB.511563.100020		33	24	9								2	1		87		54	96		16	90	29	35	8	68	18	11	37		14	36	7		27		9		15	5	19	3	31	20		17	93	12	4	48
TcCLB.509249.20		33	24	9											30	10	72	23	41	16	70	29	35	8	22		11	6	55	14	50	7	26	84		9		15	5	46	3	38	20	62	17	21	34	4	43
TcCLB.509899.100010		33	24	9											30	10	72	23	41	16	70	29	35	8	22	18	11	6	55	14	50	7	26	84		9		15	5	46	3	38	20	62	17		34	4	43
TcCLB.510035.10		33	24	9											30	10	72	23		16	70	29	35	8	22	18	11	6	55	14	50	7	26	84		9		15	5	46	3	38	20	62	17	21	34	4	43
TcCLB.511875.110		33	24	9											30	10	72	23		16	70	29	35	8	22	18	11	6	55	14	50	7	26	84		9		15	5	46	3	38	20	62	17	21	34	4	43
TcCLB.508221.440		33	24	9											30	10	72	23	41	16	70	29	35	8	22		11	6	55	14	50	7	26	84		9		15	5	46	3	38	20	62	17	21	34	4	43
TcCLB.511063.180		33	24	9											30	10	72	23		16	70	29	35	8	22	18	11	6	55	14	50	7	26	84		9		15	5	46	3	38	20	62	17	21	34	4	43
TcCLB.510483.90		33	24	9											30	10	72	23		16	70	29	35	8	22	18	11	6	55	14	50	7	26	84		9		15	5	46	3	38	20	62	17	21	34	4	43
TcCLB.506615.120		33	24	9											30	10	72	23		16	70	29	35	8	22	18	11	6	55	14	50	7	26	84		9		15	5	46	3	38	20	62	17	21	34	4	43
TcCLB.509251.30		33	24	9											30	10	72	23	41	16	70	29	35	8	22		11	6	55	14	50	7	26	84		9		15	5	46	3	38	20	62	17	21	34	4	43
TcCLB.506599.400		33	24	9											30	10	72	23		16	70	29	35	8	22	18	11	6	55	14	50	7	26	84		9		15	5	46	3	38	20	62	17	21	34	4	43
TcCLB.511915.20		33	24	9											30	10	72	23	41	16	70	29	35	8	22	18	11	6	55	14	50	7	26	84		9		15	5	46	3	38	20	62	17		34	4	43
TcCLB.511871.1000170		33	24	9											30	10	72	23	41	16	70	29	35	8	22	18	11	6	55	14	50	7	26	84		9		15	5	46	3	38	20	62		21	34	4	43
TcCLB.510275.80		33	24	9											30	10	72	23	41	16	70	29	35	8	22	18	11	6	55	14	50	7	26	84		9		15	5	46	3	38	20	62		21	34	4	43
TcCLB.511873.30		33	24	9											30	10	72	23	41		70	29	35	8	22	18	11	6	55	14	50	7	26	84		9		15	5	46	3	38	20	62	17	21	34	4	43
TcCLB.507437.30		33	24	9											30	10	72	23	41	16	70	29	35	8	22	18	11	6		14	50	7	26	84		9		15	5	46	3	38	20	62	17	21	34	4	43
TcCLB.508047.100030		33	24	9											30	10	72	23		16	70	29	35	8	22	18	11	6	55	14	50	7	26	84		9		15	5	46	3	38	20	62	17	21	34	4	43
TcCLB.506847.50		33	23	10										028-089		10	32	56		16		29		8	68	18	11	37		14	36	7		27		9	82	15	5	19	3	31	020-093		17	93	12	4	48
TcCLB.509905.10		33	23	10								2	1		87	10	54	96		16	90	29	35	8	68	18	11	37		14	36	7		27		9		15	5	19	3	31	20		17	93	12	004-014
TcCLB.506471.50		33	22	11								2	1	28	87	10	54	96		16	90	29	35	8	68	18	11	37		14	36	7	44			9		15	5	19	3	31	20			93	12	004-002
TcCLB.511129.40		33	21	12								2	1	28		10	39					029-079-078				18	11	37		14	36	7	44	27		009-061		15	5	19	3	31	20		17	93	12	4	80
TcCLB.511309.80		32	31	1								2	1	28	30	10		23	41	16		29	35	8	22	18	11	6	55	14	50	7	26			9		15	5	19	3	31	20		17	21	12	4
TcCLB.505059.20001		32	30	2	66	53	45			081-089	67	2	1	28	30	10		23	41	16		29	35	8	22	18	11	6	55	14	50	7	26			9		15	5	19	3	31	20
TcCLB.506171.100060		32	30	2								2	1	28	30	10		23	41	16		29	35	8	22	18	11	6	55	14	50	7	26			9		15	5	19	3	31	20		17	21	34	4
TcCLB.507949.190		32	30	2								2	1	28	30	10		23	41	16		29	35	8	22	18	11	6	55	14	50	7	26			9		15	5	46	3	31	20		17	21	12	4
TcCLB.511759.100020		32	30	2								2	1	28	30	10		23	41	16		29	35	8	22	18	11	6	55	14	50	7	26			9		15	5	19	3	31	20		17	21	34	4
TcCLB.509875.120		32	29	3								2	1	28	30	10		23	41	16		29	35	8	22	18	11	6		14	50	7	26			9		15	5	46	3	31	20	62	17	21	12	4
TcCLB.508173.30		32	29	3								2	1	28	30	10		23	41	16		29	35	8	22	18	11	6	55	14	50	7	26			9		15	5	46	3		20	62	17	21	12	4
TcCLB.505363.10		32	29	3								2	1	28	30	10		23	41	16		29	35	8	22	18	11	6		14	50	7	26			9		15	5	19	3	38	20	62	17	21	12	4
TcCLB.508755.11		32	29	3								2	1	28	30	10		23	41	16		29	35	8	22	18	11	6	55	14	50	7	26			9		15	5	19	3	38	20	62	17	21	12	4
TcCLB.511827.110		32	29	3								2	1	28	30	10		23	41	16		29	35	8	22	18	11	6		14	50	7	26			9		15	5	19	3	38	20	62	17	21	12	4
TcCLB.410001.20001		32	29	3								2	1	28	30	10		23	41	16		29	35	8	22	18	11	6		14	50	7	26			9		15	5	19	3	38	20	62	17	21	12	4
TcCLB.507895.100010		32	28	4								2	1	28	30	10		23	41	16		29	35	8	22	18	11	6	55	14	50	7	26			9		15	5	46	3	38	20	62	17	21		4	48
TcCLB.509165.10		32	28	4								2	1	28	30	10		23	41	16		29	35	8	22	18	11	6	55	14	50	7	26			9		15	5	46	3	38	20	62	17	21		4
TcCLB.510165.90		32	28	4								2	1	28	30	10		23	41	16		29	35	8	22	18	11	6	55	14	50	7	26			9			5	46	3	38	20	62	17	21	12	4
TcCLB.507555.100070		32	27	5								2	1	028-099	30	10		23	41	16	70	29	35	8	22		11	6	55	14	50	7	26			9		15	5	46	3	38	20	62	17	21	12	4
TcCLB.503845.60		32	27	5								2	1	028-099	30	10		23	41	16	70	29	35	8	22		11	6	55	14	50	7	26			9		15	5	46	3	38	20	62	17	21	12	4
TcCLB.511301.160		32	27	5										28	30	10		23	41	16		29	35	8	22	18	11	6	55	14	50	7	26	84		9		15	5	46	3	38	20	62	17	21	12	4
TcCLB.508573.80		32	27	5								2	1	28	30	10		23	41	16		29	35	8	22		11	6	55	14		7	26	84		9		15	5	46	3	38	20	62	17	21	12	4
TcCLB.508283.100040		32	27	5								2	1	28	30	10		23	41	16		29	35	8	22	18		6	55	14		7	26	84		9		15	5	46	3	38	20	62	17		12	4
TcCLB.511667.140		32	27	5								2	1	28	30	10		23	41	16		29	35	8	22	18	11	6	55	14	50		26			9		15	5	46	3	38	20	62	17	21	12	4
TcCLB.430781.20001		32	27	5													32	56	74	16		29	35	8	47	18	11	6	49	14	36	7	44	27	77	9	40	15	5	19	3	31	20	61	17	21	12	4	48
TcCLB.507167.190		32	26	6								2	1	28	30	10		23	41	016-044		29	35	8	22		11	6	55	14		7	26	84		9		15	5	46	3	38	20	62	17	21	12	4
TcCLB.507549.40		32	26	6								2	1	28	30	10		23	41	016-044		29	35	8	22		11	6	55	14		7	26	84		9		15	5	46	3	38	20	62	17	21	12	4
TcCLB.509223.80		32	26	6								2	1	28	30	10		23	41	016-044		29	35	8	22		11	6	55	14		7	26	84		9		15	5	46	3	38	20	62	17	21	12	4
TcCLB.505573.20001		32	26	6								2	1	28	30	10		23	41	16		29	35	8	22	18	11	6	55	14	50	7	26	84		9		15	5	46	3	38	20	62	17	21	34
TcCLB.506459.30		32	26	6								2	1	28	30	10		23	41	16		29	35	8		18		6	55	14	50	7	26	84		9		15	5	46	3	38	20	62	17	21	12	4
TcCLB.414019.20001		32	26	6											60	10	32	56	74	16		29	35	8	47	18	11	6	49	14	36	7	44	27	77	9	40	15	5	19	3	31	20	61	17	21	12
TcCLB.510853.30		32	26	6										28	30	10		23	41	16		29	35	8	22		11	6	55	14	50	7	26	84		9		15	5	46	3	38	20	62	17	21	12	4
TcCLB.510907.10		32	25	7								2	001-089			10	32			16		29		8	68	18	11	37		14	36	7		27		9	82	15	5	19	3	31	20		17	93	12	4	48
TcCLB.510491.60		32	25	7										028-095		10	42	86						8	83	18	11	6		14	36	7	26			9	82	15	5	19	3	89	20		17	21	12	4	048-064
TcCLB.420369.20		32	25	7								2	1	28	30	10		23	041-087				35	8	22	18	11	6	55	14	50	7	26	84		9		15	5	46	3	38	20	62	17	21	12	4
TcCLB.503427.9		32	25	7								2	1	28	60	10	32	56		16		29		8	47	18	11	6	49	78	36	7	44	27	77	9	40	15	005-063	19	3	31	20	61	17	21
TcCLB.507815.20		32	25	7									1	28	30	10		23	041-087				35	8	22	18	11	6	55	14	50	7	26	84		9		15	5	46	3	38	20	62	17	21	12	4
TcCLB.505975.20		32	25	7								2	1	028-095		10	42	86						8	83	18	11	6	49	14	36	7	26			9	82	15	5	19	3	89	20		17	21	12	4	48
TcCLB.506965.40		32	25	7											30	10	72	23	41	16	70	29	35	8	22	18	11	6	55	14	50	7	26	84		9		15	5	46	3	38	20	62	17	21		4	43
TcCLB.508101.9		32	25	7								2	1	28	60	10	32	56	74	16		29	35	8	47	18	11	6	49	78	36	7	44	27	77	9	40	15	5	19	3	31	20	61
TcCLB.403869.20001		32	25	7										28	60	10	32	56	74	16		29	35	8	47	18	11	6	49	78	36	7	44	27	77	9	40	15	5	19	3	31	20	61	17	21
TcCLB.508389.70		32	25	7											30	10		23	41	16	70	29	35	8	22	18	11	6	55	14	50	7	26			9		15	5	46	3	38	20	62	17	21	34	4	43
TcCLB.509287.80		32	24	8								2	1	028-089		10	54			16		29	35	8	68	18	11	37		14	36	7		27	77	9	82	15	5	19	3	31	20		17	93	12	004-066
TcCLB.506961.100070		32	24	8								2	1		87	10	54	96		16	90	29	35	8	68	18	11	37		14	36	7		27		9		15	5	19	3	31	20				12	4	48
TcCLB.511255.341		32	24	8											30	10	72	23	41	16	70	29	35	8	22	18	11	6	55	14	50	7	26	84		9		15		46	3	38	20		17	21	34	4	43
TcCLB.509897.155		32	24	8											30	10		23	41	16	70	29	35	8	22		11	6	55	14	50	7	26	84		9		15	5	46	3	38	20	62	17	21	34	4	43
TcCLB.511185.60		32	24	8											30	10	72	23		16	70	29	35	8	22	18	11	6	55	14	50	7	26	84		9		15	5	46	3	38	20	62	17	21	34	4	43
TcCLB.509157.170		32	23	9												013-089-010	32	56		16		29		8	68	18	11	37		14	36	7		27		9	82	15	5	19	3	31	20		17	93	12	4	48
TcCLB.503739.20		32	23	9								2	1	028-095		10	42	86						8	83	18	11	6	49	14	36	7	26			9	82	15	5	19	3	89	20		17	21	12	4	48
TcCLB.510307.284		32	23	9								2	1	95		10	42	86						8	83	18	11	6	49	14	36	7	26			9	82	15	5	19	3	89	20		17	21	12	4	48
TcCLB.510483.30		32	23	9											30		72	23	41	16	70	29	35	8	22		11	6	55	14	50	7	26	84		9		15	5	46	3	38	20	62	17	21	34	4	43
TcCLB.507821.40		32	23	9											30	10	72	23		16	70	29	35	8	22		11	6	55	14	50	7	26	84		9		15	5	46	3	38	20	62	17	21	34	4	43
TcCLB.509979.1000290		32	23	9											30	10	72	23		16	70	29	35	8	22	18	11	6	55	14	50	7	26	84		9		15	5	46	3	38	20	62	17		34	4	43
TcCLB.506339.100060		32	23	9											30	10	72	23			70	29	35	8	22	18	11	6	55	14	50	7	26	84		9		15	5	46	3	38	20	62	17	21	34	4	43
TcCLB.509897.1000230		32	23	9											30	10	72	23		16	70	29	35	8	22		11	6	55	14	50	7	26	84		9		15	5	46	3	38	20	62	17	21	34	4	43
TcCLB.511197.40		32	23	9											30	10	72	23		16	70	29	35	8	22	18	11	6		14	50	7	26	84		9		15	5	46	3	38	20	62	17	21	34	4	43
TcCLB.511911.60		32	21	11								2	1	28		10	039-029-060	079-078								18	11	37		14	36	7	044-060			9		15	5	19	3	31	20		17	93	12	4	80
TcCLB.507753.10		32	21	11								2	1			10	039-060	079-078								18	11	6	49	14	36	7	44			9		15	5	19	3	31	20		17	93	12	4	80
TcCLB.508637.10		32	20	12								2	001-062			10	39					029-079-078				18	11	6	49	14	36	7	44			9		15	5	19	3	31	20		17	93	12	4	80
TcCLB.507233.10		32	20	12								2	001-062			10	39					029-079-078				18	11	6	49	14	36	7	44			9		15	5	19	3	31	20		17	93	12	4	80
TcCLB.507653.1000110		32	19	13								2	1	28		10	39	79								18	11	6	49	14		7	44			009-005		15	5	19	3	31	20	62		93	12	4	80
TcCLB.506683.240		31	29	2								2	1	28	30	10		23	41	16		29	35	8	22	18	11	006-019		14	50	7	26			9		15	5	19	3	31	20		17	21	12	4
TcCLB.509527.90		31	29	2								2	1	28	30	10		23	41	16		29	35	8	22	18	11	6		14		7	26			9		15	5	19	3	38	20	62	17	21	12	4
TcCLB.510307.250		31	29	2								2	1	28	30	10		23	41	16		29	35	8	22	18	11	6		14		7	26			9		15	5	19	3	38	20	62	17	21	12	4
TcCLB.506413.89		31	28	3								2	1	28	30	10		23	41	16		29	35	8	22	18	11	6		14	50	7	26			9		15	5	19	3	38	20	62	17	21	12	4
TcCLB.426791.20001		31	27	4																					22	18	11	6	49	78	36	7	44	27	77	9	40	15	5	19	3	31	20	61	17	21	12	4	043-018
TcCLB.507015.30		31	27	4										28	30	10		23	41	16		29	35	8	22	18	11	6	55	14	50	7	26			9		15	5	46	3	38	20	62	17	21	12	4
TcCLB.509593.30		31	27	4								2	1	28	30	10		23	41	16		29	35	8	22	18		6	55	14	50	7	26			9		15	5	46	3	38	20	62	17	21	12	4
TcCLB.506843.100080		31	27	4								2	1	28	30	10		23	41	16		29	35	8	22	18	11	6		14	50	7	26			9		15	5	46	3		20	62	17	21	12	4
TcCLB.505997.100065		31	27	4								2	1	28	30	10		23	41	16		29	35	8		18	11	6	55	14	50	7	26			9		15	5	46	3	38	20	62	17	21		4
TcCLB.505993.10		31	26	5								2	1	028-099	30	10		23	41	16	70	29	35	8	22		11	6	55	14	50	7	26			9		15	5	46	3	38	20	62	17	21	12
TcCLB.505655.10		31	26	5													32	56		16		29		8	22	18	11	6	49	78	36	7	44	27	77	9	40	15	005-079			31	20	61	17	21	12	4	48
TcCLB.504241.80		31	26	5								2	1	28	30	10		23	41	16		29	35	8	22	18		6	55	14			26	84		9		15	5	46	3	38	20	62	17	21	12	4
TcCLB.511767.100060		31	26	5								2	1	28	30	10	72		41			29	35	8	22	18		6	55	14	50	7	26			9		15	5	46	3	38	20	62	17	21	12	4
TcCLB.479263.20001		31	26	5								2	1	28	30	10		23	41	16		29	35	8	22		11	6		14	50	7	26	84		9		15	5	46	3	38	20	62	17	21	12	4
TcCLB.511851.100030		31	25	6								2	1	028-089		10	32			16		29	35	8	68	18	11	37		14	36	7	44		77	9	82	15	5	19	3	31	20		17	93	12	4
TcCLB.509847.50		31	25	6								2	1	28		10	54	56		16		29	35	8	68	18	11	37		14	36	7		27		9	82	15	5	19	3	31	20		17	93	12	4	48
TcCLB.510005.20		31	25	6										28	30	10		23	41	016-020		29	35	8	22	18	11	6	55	14	50	7	26	84		9		15	5	46	3	38	20		17	21	34	4
TcCLB.509785.90		31	25	6								2	1	28	30	10		23	041-087				35	8	22		11	6	55	14	50	7	26	84		9		15	5	46	3	38	20		17	21	12	4
TcCLB.509299.20001		31	25	6										28	30	10		23	41	16		29	35	8		18	11	6	55	14	50	7	26	84		9		15	5	46	3	38	20	62	17	21	12	4
TcCLB.511861.100020		31	25	6														56		16		29	35	8	47	18	11	6	49	78	36	7	44	27	77	9	40	15	5	19	3	31	20	61	17	21	12	4	48
TcCLB.506613.1000150		31	25	6										28	60	10	32	56	74	16		29	35	8	47	18	11	6	49	14	36	7	44	27	77	9	40	15	5					61	17	21	12		48
TcCLB.509907.60		31	25	6										28	30	10		23	41	16			35	8	22	18	11	6	55	14	50	7	26	84		9		15	5	46	3	38	20		17	21	34	4	43
TcCLB.508165.14		31	25	6								2	1	28	60	10	32	56	74	16		29	35	8	47	18	11	6		78	36	7	44	27	77	9	40	15	5	19	3	31	20	61
TcCLB.510881.9		31	24	7								2	1		87	10	54	96		16	90	29	35	8	68	18	11	37		14	36	7		27		9		15	5	19	3	31	20		17	93	12	4	48
TcCLB.505937.70		31	24	7								2	1	28	30	10		23	041-087				35	8	22	18	11	6	55	14	50	7	26	84		9		15	5	46	3	38	20	62	17			4
TcCLB.453473.20001		31	24	7							67	2	1	028-095		10	42	86						8	83	18	11	6	49	14	36	7	26			9	82	15	5	19	3	89	20		17	21	12	4	48
TcCLB.506427.10		31	23	8												013-089-010	32			16		29		8	68	18	11	37		14	36	7		27		9	82	15	5	19	3	31	20		17	93	12	4	48
TcCLB.508355.80		31	23	8										028-089		10	32			16		29		8	68	18	11	37		14	36	7		27		9	82	15	5	19	3	31	020-093		17	93	12	4	48
TcCLB.509925.40		31	23	8								2	1	028-011		10	54	56		16		29	35	8	68	18	11	37		14	36	7		27		9	82	15	5	19	3	31	20		17	93	12	4	048-001
TcCLB.509539.10		31	23	8								2	1	28	87	10	54	96		16	90	29	35	8	68	18	11	37			36	7		27		9	82	15	5	19	3	31	20		17	93	12	4
TcCLB.509265.110		31	23	8								2	1	95		10	42	86						8	83	18	11	6		14	36	7	26			9	82	15	5	19	3	89	20		17	21	12	4	48
TcCLB.506129.50		31	23	8								2	1	028-095		10	42	86						8	83	18	11	6		14	36	7	26			9	82	15	5	19	3	89	20		17	21	12	4	48
TcCLB.508325.230		31	23	8								2	1	95		10	42	86						8	83	18	11	6		14	36	7	26			9	82	15	5	19	3	89	20		17	21	12	4	48
TcCLB.506537.210		31	23	8								2	1	028-099	30	10	72	23					35	8	22		11	6	55	14	50	7	26	84		9		15	5	46	3	38	20	62	17	21	12	4
TcCLB.508163.1000340		31	23	8											30	10	72	23		16	70	29	35	8	22		11	6	55	14	50	7	26	84		9		15	5	46	3	38	20	62	17	21	34	4	43
TcCLB.506389.20		31	23	8											30	10	72	23	41	16	70	29	35	8	22	18	11	6	55	14	50	7	26	84		9		15	5	46	3	38	20				34	4	43
TcCLB.506335.110		31	23	8											30	10	72	23		16	70	29	35	8	22		11	6	55	14	50	7	26	84		9		15	5	46	3	38	20		17	21	34	4	43
TcCLB.509665.13		31	23	8											30	10	72	23		16	70	29	35	8	22	18	11	6	55	14	50	7	26	84		9		15	5	46	3	38	20		17		34	4	43
TcCLB.504427.230		31	22	9												013-089-010	32			16		29		8	68	18	11	37		14	36	7		27		9	82	15	5	19	3	31	020-093		17	93	12	4	48
TcCLB.507195.100040		31	22	9								2			60	10	54			16		29	35	8	68	18	11	37		14	36	7	44		77	9	82	15	5	19	3	31	20		17	93	12	4
TcCLB.508165.330		31	22	9											30	10	72	23		16	70	29	35	8	22		11	6	55	14	50	7	26	84		9		15	5	46	3	38	20	62	17		34	4	43
TcCLB.510115.10		31	22	9											30	10	72	23			70	29	35	8	22		11	6	55	14	50	7	26	84		9		15	5	46	3	38	20	62	17	21	34	4	43
TcCLB.510729.280		31	21	10								2	1	028-062		10	39					29		008-078		18	11	37		14	36	7	044-056			9		15	5	19	3	31	20		17	93	12	4	80
TcCLB.506885.210		31	21	10								2	1	028-062		10	39					29		008-078		18	11	37		14	36	7	44			9		15	5	19	3	31	20		17	93	12	4	80
TcCLB.506885.140		31	21	10								2	1	028-062		10	39					29		008-078		18	11	37		14	36	7	44			9		15	5	19	3	31	20		17	93	12	4	80
TcCLB.508559.100020		31	21	10										28	87	10	32	88		16	90	29	35	8	68	18	11	37		14	36	7	44			9		15	5	19	3	31	20			93	12	004-002-061
TcCLB.508229.60		31	21	10								2	1	28		10	39	079-078								18	11	37		14	36	7	44			9		15	5	19	3	31	20		17	93	12	4	80
TcCLB.506763.110		31	21	10								2	1	28		10	39	079-078								18	11	37		14	36	7	44			9		15	5	19	3	31	20		17	93	12	4	80
TcCLB.510197.10		31	21	10								2	1	28		10	39	079-078								18	11	37		14	36	7	44			9		15	5	19	3	31	20		17	93	12	4	80
TcCLB.510189.60		31	21	10											30	10	72	23		16	70	29	35	8	022-077			6	55	14	50	7	26	84		9		15	5	46	3	38	20	62	17	21	34	4	43
TcCLB.510175.30		31	20	11								2	1	28		10	39					029-079-078				18	11	6	049-084		36	7	44			9		15	5	19	3	31	20			93	12	4	80
TcCLB.504425.10		31	20	11										28		10	39	079-078								18	11	6	49	14	36	7	44			9		15	5	19	3	31	20		17	93	12	4	80
TcCLB.511665.60		31	18	13								2	1	28		10	39	79								18	11	6	49	14		7	44			009-005		15	5		3	31	20	62		93	12	4	80
TcCLB.507875.1000200		30	29	1								2	1	28	30	10		23	41	16		29	35	8	22	18	11	6	55	14			26			9		15	5	19	3	31	20	62	17	21	12	4
TcCLB.507231.100020		30	27	3								2	1	28	30	10		23	41	16		29	35	8	22		11	6		14		7	26			9		15	5	46	3	31		62	17	21	12	4
TcCLB.511213.70		30	27	3								2	1	28	30	10		23	41	16		29	35	8	22		11	6		14		7	26			9		15	5	46	3	31		62	17	21	12	4
TcCLB.511197.10		30	27	3																			35	8	47	18	11	6	49	14	36	7	44	27	77	9	40	15	5	19	3	31	20	61	17	21	12	4	48
TcCLB.504799.20001		30	26	4	66	053-013	45	85	71	081-028-062	67	2	1	28	30	10		23	41	16	70	29	35	8	22	18	11	6	55	14	50	7	26	84		9
TcCLB.510851.40		30	26	4								2	1	28		10		23	41	16		29	35	8	22		11	6		14	50	7	26			9		15	5	46	3	31		62	17	21	12	4
TcCLB.510849.20		30	26	4								2	1	28	30	10		23		16		29	35	8	22		11	6		14	50	7	26			9		15	5	46	3	31		62	17	21	12	4
TcCLB.510643.1000180		30	25	5									1	28	30	10			41	16		29	35	8		18	11	6	55	14	50	7	26			9		15	5	46	3	38	20	62	17	21	12	4
TcCLB.504115.5		30	25	5							035-067	2	1	28	30	10		23	41	16				8	22		11	6	55	14		7	26	84		9		15	5	46	3	38	20	62	17	21	12	4
TcCLB.508305.9		30	25	5								2	1	28	60	10	32	56		16		29	35	8	22	18	11	6	49	78	36	7	44	27	77	9	40	15	5	19	3	31	20
TcCLB.510919.9		30	25	5								2	1	28	60	10	32	56		16		29	35	8	22	18	11	6	49	78	36	7	44	27	77	9	40	15	5	19	3	31	20
TcCLB.508479.100050		30	25	5										28	30	10		23	41	16		29	35	8	22	18	11	6	55	14	50	7	26	84				15	5	46	3	38	20	62	17	21	12	4
TcCLB.503667.10		30	25	5												10		23	41	16		29	35	8	22	18	11	6	55	14	50	7	26	84		9		15	5	46	3	38	20	62	17	21	12	4
TcCLB.511859.1000100		30	24	6								2	1	28		10	54			16		29	35	8	68	18	11	37		14	36	7		27		9	82	15	5	19	3	31	20		17	93	12	4	048-001
TcCLB.505297.100080		30	24	6								2	1	28		10	54			16		29	35	8	68	18	11	37		14	36	7		27		9	82	15	5	19	3	31	20		17	93	12	4	048-001
TcCLB.506951.30		30	24	6								2	1	28		10	54			16		29	35	8	68	18	11	37		14	36	7		27		9	82	15	5	19	3	31	20		17	93	12	4	048-001
TcCLB.509417.9		30	24	6								2	1	028-099	30	10		23	41	16		29	35	8	22	18	11	6	55	14	50	7	26	84		9		15	5	46	3	38	20	62	17
TcCLB.506843.1000120		30	24	6								2	1	28	30	10		23	041-087				35	8	22	18		6	55	14	50	7	26	84		9		15	5	46	3	38	20	62	17	21	12	4
TcCLB.510867.19		30	24	6							035-067	2	1	28	30	10		23	41	16				8	22		11	6	55	14		7	26	84		9		15	5	46	3	38	20	62	17	21		4
TcCLB.508161.50		30	24	6																		29	35	8	47	18	11	6	49	78	36	7	44	27		9	40	15	5	19	3	31	20	61	17	21	12	4
TcCLB.507283.39		30	24	6											30	10	72	23	41	16	70	29	35	8	22	18	11	6	55	14	50	7	26	84		9		15	5	46	3	38	20	62	17	21
TcCLB.506209.100050		30	24	6										28	30	10		23	41	16		29	35	8	22		11	6	55	14	50	7	26	84		9			5	46	3	38	20	62	17	21	12	4
TcCLB.511593.100040		30	23	7								2	1	028-089		10				16		29	35	8	68	18	11	37		14	36	7	44		77	9	82	15	5	19	3	31	20		17	93	12	4
TcCLB.504101.40		30	23	7								2	1	28		10	54	56		16		29	35	8	68	18	11	37		14	36	7		27		009-096		15	5	19	3	31	20		17	93	12	4	048-001
TcCLB.446377.20001		30	23	7										028-089		10				16	90	29	35	8	68	18	11	37		14	36	7		27		9		15	5	19	3	31	20		17	93	12	4	48
TcCLB.510233.39		30	23	7								2	1		87	10	54	96		16	90	29	35	8	68	18	11	37		14	36	7		27		9		15	5	19	3	31	20		17	93	12	4
TcCLB.506323.40		30	23	7										028-099	30	010-013			41	16	70	29	35	8	22		11	6	55	14		7	26	84		9		15	5	46	3	38	20	62		21	12	4
TcCLB.507611.230		30	23	7								2	1	28	30	10		23	041-087				35	8	22		11	6	55	14	50	7	26	84		9		15	5	46	3	38	20	62	17	21	12
TcCLB.510307.1000210		30	23	7										28	30	10		23	041-087				35	8	22	18	11	6	55	14	50	7	26	84		9		15	5	46	3	38	20	62	17	21	12	4
TcCLB.424383.9		30	23	7														23	41	16	70	29	35	8	22	18	11	6	55	14	50	7	26	84		9		15	5	46	3	38	20	62	17	21	34	4	43
TcCLB.509655.10		30	23	7									1	28	60	10	32	56	74	16		29	35	8	47	18	11	6	49	78	36	7	44	27	77	9	40	15	5					61	17	21	12
TcCLB.503907.10		30	22	8												013-089-010	032-047			16		29		8	68	18	11	37		14	36	7		27		9	82	15	5	19	3	31	20		17	93	12	4	48
TcCLB.503769.20		30	22	8												013-089-010	32			16		29		8	68	18	11	37		14	36	7		27		9	82	15	5	19	3	31	020-093		17	93	12	4	48
TcCLB.506577.80		30	22	8												013-089-010	32			16		29		8	68	18	11	37		14	36	7		27		9	82	15	5	19	3	31	020-093		17	93	12	4	48
TcCLB.506139.140		30	22	8											30	10	72	23		16	70	29	35	8	22	18	11	6	55	14	50	7	26	84		9		15		46	3	38	20			21	34	4	43
TcCLB.511063.30		30	22	8															41	16	70	29	35	8	22	18	11	6	55	14	50	7	26	84		9		15	5	46	3	38	20	62	17	21	34	4	43
TcCLB.507175.20001		30	21	9															41	016-060		29	35	8	22	18	11	6	55	14	50	7	26	84		9		15	5	46	3	38	20	62	17	21	34	4	43
TcCLB.510049.10		30	21	9																16		29	35	8	22	18	11	6	55	14	50	7	26	84		9		15	5	46	3	38	20	62	17	21	34	4	43
TcCLB.507245.100020		30	20	10								2	1	28		10	039-018							008-078		18	11	6		14	36	7	44			9		15	5	19	3	31	20	62		93	12	4	80
TcCLB.506667.110		30	20	10											30	10	72	23		16	70	29	35	8	022-077			6	55	14	50	7	26	84		9		15	5	46	3	38	20	62		21	34	4	43
TcCLB.508045.120		30	19	11										28		10	039-087	079-078								18	11	37		14	36	7	44			9		15	5	19	3	31	20		17	93	12	4	80
TcCLB.509333.10		30	19	11										28		10	39	079-078								18	11	37		14	36	7	44			9		15	5	19	3	31	20		17	93	12	4	80
TcCLB.511301.1000180		30	19	11								2	1	28		10	39	079-078								18	11	37		14	36		44			9		15	5	19	3	31	20		17	93	12	4	80
TcCLB.508451.10		30	19	11								2	1	28		10	39	079-078								18	11	37		14	36		44			9		15	5	19	3	31	20		17	93	12	4	80
TcCLB.507905.30		30	19	11								2	1			10	39	079-078								18	11	37		14	36	7	44			9		15	5	19	3	31	20		17	93	12	4	80
TcCLB.508629.100		30	19	11								2	1	28		10	39	079-078								18	11	37		14	36		44			9		15	5	19	3	31	20		17	93	12	4	80
TcCLB.508023.20		30	19	11								2	1	28		10	39	079-078								18	11	37		14	36		44			9		15	5	19	3	31	20		17	93	12	4	80
TcCLB.505297.50		30	19	11								2	1	028-029		10	039-029	079-078								18	11	6	49	14	36	7	44					15	5	19	3	31	20		17	93	12	4	80
TcCLB.508061.1000130		30	19	11								2	1	28		10	39	079-078								18	11	6	49	14	36		44			9		15		19	3	31	20		17	93	12	4	80
TcCLB.504429.50		30	18	12												013-010	39	079-078								18	11	6	49	14	36	7	44			9		15	5	19	3	31	20		17	93	12	4	80
TcCLB.507975.100050		30	18	12							67	2	1			10	39	079-078								18	11	6	49	14		7	44			009-005		15	5		3	31	20			93	12	4	80
TcCLB.508919.1000180		30	16	14								2	1	28		10	39	79									11	6	49	14		7	44			009-005		15	5	019-017		31	20	62		93	12	4	80
TcCLB.509735.1000140		29	27	2								2	1	28	30	10		23	41	16		29	35		22	18	11	6	55	14	50	7	26			9		15	5		3	31	20				12	4
TcCLB.508523.100050		29	26	3								2	1	28	30	10		23	41	16		29	35	8	22	18	11	6	55	14	50	7	26	84		9		15	5	46					17		12	4
TcCLB.460111.10		29	25	4																16		29	35	8	47	18	11	6		78	36	7	44	27	77	9	40	15	5	19	3	31		61	17	21	12	4	48
TcCLB.506173.1000179		29	25	4								2		28	30	10		23	41	16		29	35	8	22		11	6	55	14		7	26	84		9		15		46	3	38	20	62	17	21	12	4
TcCLB.506443.130		29	25	4								2		28	30	10		23		16		29	35	8		18	11	6	55	14	50	7	26			9		15	5	46	3	38	20	62	17	21		4
TcCLB.425435.10		29	25	4														56	74	16		29	35	8	22	18	11	6	49	14	36	7	44	27		9	40	15	5	19	3	31	20	61	17	21	12	4
TcCLB.505109.20001		29	25	4																16		29	35	8	47	18	11	6	49	78	36	7	44	27	77	9	40	15	5	19	3	31	20	61	17	21	12	4
TcCLB.506389.10		29	25	4																			35	8	47	18	11	6	49	14	36	7	44	27	77	9	40	15	5	19	3	31	20	61	17	21	12	4	48
TcCLB.507801.230		29	24	5								2	1	28		10	54			16		29	35	8	68	18	11	37		14	36	7		27		9		15	5	19	3	31	20		17	93	12	4	048-001
TcCLB.505025.150		29	24	5								2	1	28	60	10	32	56	74	16		29	35	8	22	18	11	6	49	14	36	7	44	27	77	9	40	15	5	19	3
TcCLB.461801.20001		29	24	5							67	2	1	28	30	10	72	23	41	16		29	35	8	22		11	6	55	14	50	7	26	84		9		15	5	46	3	38	20
TcCLB.507849.10		29	23	6												089-010	32			16		29		8	68	18	11	37		14	36	7		27		9		15	5	19	3	31	20		17	93	12	4	48
TcCLB.503569.20001		29	23	6							008-089-067	2	1	028-089		10	54			16		29	35	8	68	18	11	37		14	36	7		27		9	82	15	5	19	3	31	20		17		12	4
TcCLB.511099.1000180		29	23	6								2	1	28		10	54			16		29	35	8	68	18	11	37		14	36	7		27		9	82	15		19	3	31	20		17	93	12	4	048-001
TcCLB.508521.100090		29	23	6								2	001-089			10		79		16		29	35	8	68	18	11	37		14	36	7		27	77	9	82	15	5	19	3	31			17		12	4
TcCLB.510077.20		29	23	6										28	30	10		23	041-087				35	8	22	18	11	6	55	14	50	7	26	84		9		15	5	46	3	38	20	62	17	21	12	4
TcCLB.476771.20001		29	23	6												056-010		23	41	16		29	35	8	22	18	11	6	55	14	50	7	26	84		9		15	5	46	3		20		17	21	34	4	43
TcCLB.431525.20001		29	23	6											30	10		23	41	16		29	35	8	22		11	6	55		50	7	26	84		9		15	5	46	3	38	20	62	17	21	12	4
TcCLB.506055.100014		29	22	7								2	1	028-095		10	42	86						8	83	18	11	6		14	36	7	26			9	82	15	5	19	3	89	20		17	21	12	4	48
TcCLB.398915.20001		29	22	7								2	1	28	60	10	32	56		16	90	29		8	47	18	11	6	49	78	36	7	44	27	77	9	40	15	5	19	3	31
TcCLB.507121.11		29	22	7								2	1	95		10	42	86						8	83	18	11	6	49	14	36	7	26			9	82	15	5	19	3	89	20		17	21	12	4	48
TcCLB.504419.20001		29	20	9								2	1	28		10	039-060	079-078								18	11	37		14	36	7	44			9		15	5	19	3	31	20		17	93	12	4	80
TcCLB.509377.100020		29	20	9										28		10	039-060	079-078								18	11	6	49	14	36	7	44			9		15	5	19	3	31	20		17	93	12	4	80
TcCLB.506251.70		29	19	10										28		10	039-060	079-078								18	11	37		14	36	7	44			9		15	5	19	3	31	20		17	93	12	4	80
TcCLB.510331.10		29	18	11										028-088		10	039-060	079-078								18	11	37		14	36	7	044-060			9		15	5	19	3	31	20		17	93	12	4	80
TcCLB.508735.100010		29	18	11								2	1	028-029		10	039-029	079-078								18	11	37		14	36	7	44					15	5	19	3	31	20		17	93	12	4	80
TcCLB.505943.95		28	27	1								2	1	28	30	10		23	41	16		29	35		22	18	11	6	55	14	50	7	26			9		15	5		3	31	20				12	4
TcCLB.508527.30		28	26	2								2	1	28	30	10		23	41	16		29	35		22	18	11	6	55	14	50	7	26			9		15	5		3	31					12	4
TcCLB.511615.10		28	25	3																		29	35	8	47	18	11	6	49	14	36	7		27	77	9	40	15	5	19	3	31	20	61	17	21	12	4
TcCLB.422223.20001		28	24	4																				8	83	18	11	6		14	36	7	26			9	82	15	5	19	3	89	20		17	21	12	4	048-064
TcCLB.510591.10		28	24	4														23	41	16		29	35	8	22	18	11	6	55	14	50	7	26			9		15	5	46	3	38	20	62	17	21	12	4
TcCLB.503445.100020		28	24	4									1	28	30	10		23		16		29	35	8		18	11	6	55	14	50	7	26			9		15	5	46	3	38	20	62	17	21		4
TcCLB.506003.39		28	23	5								2	1	028-099	30	10		23	41	16	70	29	35	8	22	18	11	6	55	14	50	7	26	84		9		15	5	46	3	38
TcCLB.504187.21		28	23	5												10		23	41			29	35	8	22	18	11	6	55	14	50	7	26	84		9		15	5	46	3	38	20	62	17	21	12	4
TcCLB.505093.20001		28	23	5																		29		8	47	18	11	6	49	78	36	7	44	27	77	9	40	15	5	19	3	31	20	61	17	21	12	4
TcCLB.416503.20001		28	23	5														23		16		29	35	8	22	18	11	6	55	14		7	26	84		9		15	5	46	3	38	20	62	17	21	12	4
TcCLB.507219.9		28	22	6												013-089-010	32			16		29		8	68	18	11	37		14	36	7		27		9	82	15	5	19	3	31	20		17	93	12	4	48
TcCLB.506717.25		28	22	6												089-010	32					29	35	8	68	18	11	37		14	36	7		27		9		15	5	19	3	31	20		17	93	12	4	48
TcCLB.424427.20001		28	20	8							67	2	1	28		10	39	079-078								18	11	37		14	36	7	44			9		15	5	19	3	31	20		17	93	12	4	80
TcCLB.511779.60		28	19	9										28		10	039-060	079-078								18	11	37		14	36	7	044-074			9		15	5	19	3	31	20		17	93	12	4	80
TcCLB.509629.10		28	19	9										28		10	039-060	079-078								18	11	37		14	36	7	44			9		15	5	19	3	31	20		17	93	12	4	80
TcCLB.511105.60		28	19	9																					68	18	11	37		14	36	7		27		9	82	15	5	19	3	31	20		17	93	12	4	48
TcCLB.510693.260		28	19	9											30	10	72	23			70	29	35	8	22			6	55	14	50	7		84		9		15	5	46	3	38	20	62	17		34	4	43
TcCLB.417299.20001		28	19	9																			35	8	22	18	11	6	55	14	50	7	26	84		9		15	5	46	3	38	20	62	17	21	34	4	43
TcCLB.506081.20001		28	17	11											60			079-078								18	11	37		14	36	7	044-060			9		15	5	19	3	31	20		17	93	12	4	80
TcCLB.503439.40		28	14	14								2	1	28		10	39	079-078								18	11	37		14		7	44			009-005		15	005-028			31	20	62		093-095		4	80
TcCLB.510403.71		27	25	2								2	1	28	30	10		23	41	16		29	35		22	18	11	6	55	14	50	7	26			9		15	5				20				12	4
TcCLB.509735.60		27	25	2								2	1	28	30	10		23	41	16		29	35		22	18		6	55	14	50	7	26			9		15	5		3	31	20				12	4
TcCLB.506823.65		27	24	3								2	1	28	030-062			23	41	16		29	35		22	18	11	6	55		50	7	26			9		15	5		3	31	20				12	4
TcCLB.511757.100		27	23	4								2	1	28	30	10	72	23	41	16		29	35	8	22	18	11	6	55	14	50	7	26	84		9		15	5	46	3
TcCLB.509265.120		27	22	5														86						8	83	18	11	6		14	36	7	26			009-066		15	5	19	3	89	20		17	21	12	4	48
TcCLB.508313.14		27	22	5								2	1	28	60	10	32	56		16		29	35	8	22	18	11	6	49	78	36	7	44	27	77	9	40	15	5	19
TcCLB.443923.20001		27	22	5														23	41	16		29	35	8	22		11	6	55	14	50	7	26	84		9		15	5	46	3	38	20	62	17	21	12	4
TcCLB.506173.219		27	21	6										28		10	54			16		29		8	68	18	11	37		14	36	7		27		9	82	15		19	3	31	20		17	93	12	4
TcCLB.414695.20001		27	21	6																16			35	8	22	18	11	6	55	14	50	7	26	84		9		15	5	46	3	38	20	62	17	21	12	4
TcCLB.508539.169		27	21	6								2	1	28	60	10	32	56	74	16		29	35	8	47	18	11	6	49	14	36	7	44	27	77	9	40	15	5
TcCLB.508061.154		27	20	7								2	1	028-089		10	54	96		16	90	29	35	8	68	18	11	37		14	36	7		27		9	82	15	5	19	3	31	20
TcCLB.416041.14		26	25	1								2	1	28	30	10		23	41	16		29	35	8	22	18	11	6	55	14	50	7	26			9		15	5	19	3	31
TcCLB.437805.9		26	25	1																16		29	35	8	22	18	11	6		14	36	7	44	27	77	9	40	15	5	19	3	31	20	61	17	21	12
TcCLB.504049.30		26	25	1								2	1	28	30	10		23	41	16			35		22	18	11	6	55	14	50	7	26			9		15	5		3	31					12	4
TcCLB.507875.130		26	25	1								2	1	28	30	10			41	16		29	35		22	18	11	6	55	14	50	7	26			9		15	5		3	31	20				12	4
TcCLB.510769.202		26	25	1								2	1	28	30	10		23	41	16			35		22	18	11	6	55	14	50	7	26			9		15	5		3	31	20				12	4
TcCLB.506961.25		26	23	3										28		10				16		29	35	8	22	18		6		14		7	26			9	40	15	5	46	3	38	20		17	21	12	4
TcCLB.406115.20001		26	23	3																16		29	35	8	47	18	11	6	49	14	36	7	44	27	77	9	40	15	5	19	3	31	20	61		21	12
TcCLB.442103.20001		26	23	3																16		29	35	8	47	18	11	6		78	36	7	44	27	77	9	40	15	5	19	3	31	20	61	17	21	12
TcCLB.505267.60		26	22	4								2	1	028-012									35	8	22		11	37		14	36	7		27		9	40	15	5	19	3	31	20	62	17	21	12	004-089
TcCLB.507085.30	Yes	26	21	5									1 (weak)			10				16		29	35	8	22	18	11	6		14		7	26			9		15	5	46	3	38	20		17	21	12	004-082-082-082
TcCLB.506057.40		26	21	5												089-010	54			16		29	35	8	68	18	11	37		14	36	7		27		9	82	15	5	19	3	31	20		17		12	4
TcCLB.503661.11		26	21	5																16		29	35	8	68	18	11	37		14	36	7	44		77	9	82	15	5	19	3	31	20		17	93	12	4
TcCLB.508883.48		26	21	5								2	1	28	60	10	32	56	74	16		29	35	008-078		18	11	6		14	36	7	44	27	77	9	40	15	5	19
TcCLB.410923.100040		26	21	5															41	16		29	35	8	22	18		6	55	14	50	7	26			9		15	5	46	3	38	20	62	17	21	12
TcCLB.443781.20001		26	21	5															41	16	70	29	35	8	22	18	11	6	55	14	50	7	26	84		9		15	5	46	3	38	20	62	17	21
TcCLB.469113.20001		26	21	5															41	16	70	29	35	8	22	18	11	6	55	14	50	7	26	84		9		15	5	46	3	38	20	62	17	21
TcCLB.510831.21		26	21	5										28	60	10	32	56		16		29	35	8	47	18	11	6	49	14	36	7	44	27	77	9	40	15	5	19	3
TcCLB.510787.10	Yes	26	20	6												10				16		29	35	8	22	18	11	6		14		7	26			9		15	5	46	3	38	20		17	21	12	004-064-064-064
TcCLB.511551.50		26	20	6								2	1	28	87	10	54	96		16	90		35	8	68	18	11	37		14	36	7		27		9		15	5	19	3	31	20
TcCLB.508751.20		26	19	7								2	1	28		10	39	079-078								18	11	37		14	36	7	44			9		15	5	19	3	31	20		17	93	12	4	80
TcCLB.510981.20		26	18	8																							11	37		14	36	7		27		9	82	15	5	19	3	31	20		17	93	12	4	48
TcCLB.510411.40		26	18	8																				8	22	18	11	6	55	14	50	7	26	84		9		15	5	46	3		20	62	17	21	034-097	4	43
TcCLB.510551.50		26	17	9																					68	18	11	37		14	36	7	44			9		15	5	19	3	31	20		17	93	12	4	80
TcCLB.504593.10		26	17	9																							11	6	49	14	36	7	44			9		15	5	19	3	31	20		17	93	12	4	80
TcCLB.511415.21		25	24	1								2	1	28	30	10		23	41	16		29	35		22	18		6	55	14	50	7	26			9		15	5		3	31						4
TcCLB.507691.61		25	24	1								2	1	28	30	10		23	41	16		29	35		22	18	11	6	55		50	7	26			9		15	5		3						12	4
TcCLB.506343.100041		25	24	1								2	1	28	30	10		23	41	16			35		22	18	11	6	55	14	50	7	26			9		15	5		3	31	20				12
TcCLB.506675.99		25	23	2								2	1	28	030-062			23	41	16		29	35		22	18	11	6	55	14	50	7	26			9		15	5		3	31					12	4
TcCLB.506507.40		25	23	2								2	1	028-062				23	41	16		29	35		22	18	11	6	55		50	7	26			9		15	5		3	31	20				12	4
TcCLB.509915.55		25	23	2								2	1	28	030-062			23		16		29	35		22	18	11	6	55	14	50	7	26			9		15	5		3	31	20				12	4
TcCLB.505957.140		25	23	2										28	030-062			23	41	16		29	35		22	18	11	6	55	14	50	7	26			9		15	5		3	31	20				12	4
TcCLB.508001.60		25	23	2								2	1	28	030-062			23		16		29	35		22	18	11	6	55	14	50	7	26			9		15	5		3	31	20				12	4
TcCLB.507611.260		25	22	3												010-022				16		29	35	8	22	18	11	6		14	36	7	26			9		15	5	46	3	38	20		17	21	12	4
TcCLB.509085.110		25	22	3										28	030-062			23	41	16		29	35		22	18	11	6	55		50	7	26			9		15	5		3	31	20				12	4
TcCLB.507687.10		25	22	3																						18	11	6	49	14	36	7	44	27	77	9	40	15	5	19	3	31	20	61	17	21	12	4	48
TcCLB.507035.11		25	22	3								2	1	28	30	10		23	41	16		29	35	8	22	18	11	6	55	14	50	7	26	84		9		15	5	46
TcCLB.472133.20001		25	22	3																								6	49	78	36	7	44	27	77	9	40	15	5	19	3	31	20	61	17	21	12	4	48
TcCLB.425009.20001		25	22	3																						18	11	6	49	78	36	7	44	27	77	9	40	15	5	19	3	31	20	61	17	21	12	4	48
TcCLB.479143.20001		25	22	3																		29	35	8	47	18	11	6	49	14	36	7	44	27	77	9	40	15	5	19	3	31	20	61	17	21
TcCLB.486303.20001		25	22	3							67	2	1	28	30	10	72	23	41	16	70	29	35	8	22	18	11	6	55	14	50	7	26	84		9
TcCLB.507427.10		25	21	4												013-010				16		29	35	8	22	18		6		14		7	26			9	40	15	5	46	3	38	20		17	21	12	4
TcCLB.504293.20001		25	21	4																		29	35	8	22	18	11	6		14	50	7	26	84		9		15	5	46	3	31	20	62	17	21	12	4
TcCLB.509495.30	Yes	25	20	5												10				16		29	35	8	22	18		6		14		7	26			9		15	5	46	3	38	20		17	21	12	004-064-082-082-064-064
TcCLB.507137.20001		25	20	5												10				16		29	35	8	22	18	11	6		14		7	26			9		15	5	46	3	38	20		17	21	12	004-064
TcCLB.425811.20001		25	20	5																		29	35	8	22	18	11	6	55	14	50	7	26	84		9		15	5	46	3	38	20	62	17	21	12	4
TcCLB.402657.20001		25	20	5																			35	8	22	18	11	6	55	14	50	7	26	84		9		15	5	46	3	38	20	62	17	21	12	4
TcCLB.415077.20001		25	19	6													32	96		16	90	29	35	8	68	18	11	37		14	36	7		27		9	82	15	5	19	3	31	20		17	93
TcCLB.505003.20001		25	18	7								2	1	028-095		10	42	86						8	83	18	11	6	49	14	36	7	26			9	82	15	5	19	3	89	20		17
TcCLB.508071.100080		25	17	8								002-089				010-098				16		29	35	8	68	18	11	37		014-049		7	44		77	9	82	15	5	19	3	31			17		12	004-066
TcCLB.504471.20001		25	17	8																						18	11	37		14	36	7	44			9		15	5	19	3	31	20		17	93	12	4	80
TcCLB.511585.310		24	24	0										28	30	10		23	41	16		29	35		22	18		6	55	14		7	26			9		15	5		3	31	20				12	4
TcCLB.503993.10	Yes	24	23	1												10				16		29	35	8	22	18	11	6		14	36	7	26			9		15	5	19	3	38	20		17	21	12	4
TcCLB.503985.100010		24	23	1								2	1	28	030-062			23	41	16		29	35			18	11	6	55	14		7	26			9		15	5		3	31	20				12	4
TcCLB.511019.100026		24	23	1								2	1	28	030-062			23	41	16		29	35		22	18	11	6	55	14		7	26			9			5		3	31	20				12	4
TcCLB.508523.21		24	23	1								2	1	28	30	10		23		16		29	35		22	18	11	6	55	14	50	7	26			9		15	5		3						12	4
TcCLB.510643.1000121		24	23	1								2	1	28		10		23		16		29	35		22	18	11	6	55	14	50	7	26			9		15	5		3		20				12	4
TcCLB.511371.10005		24	23	1								2	1	28	30	10		23	41	16		29	35		22			6	55	14		7	26			9		15	5		3		20					4
TcCLB.505931.30	Yes	24	22	2												010-084				16		29	35	8	22	18	11	6		14	36	7	26			9		15	5	19	3	38	20		17	21	12	4
TcCLB.507723.41		24	22	2								2	1	028-062				23	41	16		29	35		22	18	11	6	55	14	50	7	26			9			5		3	31	20				12	4
TcCLB.510853.100096		24	22	2								2	1	28	030-062			23	41	16			35		22			6	55	14	50	7	26			9		15	5		3	31	20				12	4
TcCLB.506273.10		24	22	2								2	1	28	030-062				41	16		29	35		22	18	11	6	55	14		7	26			9			5		3					21	12	4
TcCLB.506713.80		24	22	2								2	1	28	30	10		23	41	16		29	35	8	22	18	11	6	55	14	50	7	26	84		9		15	5
TcCLB.504459.20001		24	22	2									1			10				16		29	35	8	22	18		6		14		7	26			9	40	15	5	46	3	38	20		17	21	12	4
TcCLB.506035.4		24	22	2								2	1	28	30	10		23	41	16	70	29	35	8	22	18	11	6	55	14	50	7	26	84		9		15
TcCLB.506225.20		24	22	2								2	1	28	30	10		23	41	16		29	35	8	22	18	11	6	55	14		7	26	84		9		15	5	46
TcCLB.508559.80		24	22	2								2	1	28	030-062			23	41	16		29	35		22				55	14	50	7	26			9		15	5		3	31	20				12	4
TcCLB.509817.50	Yes	24	21	3												013-010-022				16		29	35	8	22	18		6		14	36	7	26			9		15	5	46	3	38	20		17	21	12	4
TcCLB.508857.30	Yes	24	21	3												013-010-022				16		29	35	8	22	18		6		14	36	7	26			9		15	5	46	3	38	20		17	21	12	4
TcCLB.507821.1000140		24	21	3								2	1	28	030-062			23	41	16		29	035-028			18		6	55	14	50	7	26			9		15	5		3	31	20				12	4
TcCLB.463901.20001		24	21	3																		29	35	8	47	18	11	6		78	36	7	44	27	77	9	40	15	5	19	3	31	20	61	17	21
TcCLB.508089.10	Yes	24	20	4												013-010-022				16		29	35	8	22	18	11	6		14	36	7	26			9		15	5	46	3	38	20		17	21	12	004-012
TcCLB.432997.10		24	20	4																16		29		8	68	18	11	37		14	36	7		27		9	82	15	5	19	3	31	20		17	93	12	4	48
TcCLB.507553.30		24	20	4											30	10	72	23	41	16	70	29	35	8	22	18	11	6	55	14	50	7	26	84		9		15	5	46
TcCLB.423463.20001		24	20	4											30	10		23	41	16		29	35	8	22	18	11	6	55	14	50	7	26	84		9		15	5	46	3	38
TcCLB.432009.20001		24	20	4																							11	6	49	78	36	7	44	27	77	9	40	15	5	19	3	31	20	61	17	21	12	4
TcCLB.411295.20001		24	20	4															41	16		29	35	8	22	18		6	55	14		7	26	84		9		15	5	46	3	38	20	62	17	21	12
TcCLB.510891.40		24	19	5								2	001-089			10	54			16		29	35	8	68	18	11	37		14	36	7		27		9	82	15	5	19	3	31	20
TcCLB.506923.10		24	19	5												010-022-084				16		29	35	8	22	18	11	6		14		7	26			9		15	5	46	3	38	20		17	21	12	004-064-064-064
TcCLB.478455.20001		24	19	5																							11	6	49	78	36	7	44	27	77	9	40	15	5	19	3	31	20	61	17	21	12	004-090
TcCLB.490989.20001		24	19	5											60	10	32	56		16		29	35	8	47	18	11	6		78	36	7	44	27	77	9	40	15	5	19	3
TcCLB.407695.20001		24	19	5															74	16		29	35	8	47	18	11	6	49	78	36	7	44	27	77	9	40	15	5	19	3	31	20
TcCLB.468217.30		24	19	5																								6	49	78	36	7	44	27	77	9	40	15	5	19	3	31	20	61	17	21	12	4
TcCLB.508603.10		24	18	6																							11	37		14	36	7		27		9	82	15	5	19	3	31	20		17	93	12	4	48
TcCLB.438851.20001		24	18	6																		29		8	68	18	11	37		14	36	7		27		9	82	15	5	19	3	31	020-093		17	93	12	4	48
TcCLB.468423.20001		24	18	6													32	56		16		29	35	8	47	18	11	6	49	78	36	7	44	27	77	9	40	15	5	19	3	031-068
TcCLB.484719.20001		24	18	6										28	60	10	32	56	74	16		29	35	008-078		18	11	6	49	14	36	7	44	27	77	9	40	15	5
TcCLB.504441.20001		24	18	6								2	1		60	10	32	56	74	16		29	35	8	47	18	11	6	49	14	36	7	44	27	77	9	40
TcCLB.508125.149		24	18	6								2	1	28	60	10	32	56	74	16		29		8	22	18	11	6	49	78	36	7	44	27	77	9	40
TcCLB.509031.20		24	18	6								2	1	28	60	10	32	56	74	16		29	35	8	47	18	11	6	49	14	36	7	44	27	77	9
TcCLB.471031.20001		24	18	6							67	2	1	95		10	42	86						8	83	18	11	6		14	36	7	26			9	82	15	5	19	3	89	20
TcCLB.507505.10		24	17	7																						18	11	37		14	36	7	044-074			9		15	5	19	3	31	20		17	93	12	4	80
TcCLB.420945.20001		24	17	7							67	2	1	028-095		10	42	86						8	83	18	11	6	49	14	36	7	26			9	82	15	5	19	3	89
TcCLB.412563.20001		24	16	8																				8	22	18	11	6	55	14	50	7	26	84		9		15	5	46	3	38	20	62	17	21	34		43
TcCLB.401183.20001		24	16	8																						18	11	6	55	14	50	7	26	84		9		15	5	46	3	38	20	62	17	21	34	4	43
TcCLB.505853.20001		24	16	8																						18	11	6	55	14	50	7	26	84		9		15	5	46	3	38	20	62	17	21	34	4	43
TcCLB.432909.20001		24	16	8																						18	11	6	55	14	50	7	26	84		9		15	5	46	3	38	20	62	17	21	34	4	43
TcCLB.511885.100035		23	22	1								2	1	028-050-062					41	16		29	35		22	18	11	6	55	14		7	26			9		15	5		3	31	20				12	4
TcCLB.506919.20		23	22	1								2	1	28	030-062			23	41	16		29	35			18		6	55	14		7	26			9		15	5		3		20				12	4
TcCLB.503763.50		23	22	1								2	1	28	30	10		23	41	16		29	35	8	22	18	11	6	55	14	50	7	26			9			5	19
TcCLB.506767.1000170		23	22	1								2	1	28						16		29		8	22	18				14		7	26			9	40	15	5	19	3		20		17	21	12	4
TcCLB.510693.100050		23	21	2								2	1	028-004					41	16		29		8	22			6		14		7	26			9	40	15	5	19	3		20		17	21	12	004-016
TcCLB.507167.1000259		23	21	2								2	1	028-062				23	41	16		29	35		22	18	11	6	55		50	7	26			9		15	5		3		20				12	4
TcCLB.503861.30		23	21	2										28	030-062			23	41	16		29	35		22	18	11	6	55		50	7	26			9		15	5		3	31	20				12	4
TcCLB.510111.11		23	21	2										28	030-062			23	41	16		29	35		22			6	55	14		7	26			9		15	5		3	31	20				12	4
TcCLB.423939.20001		23	21	2																							11	6		14	36	7	44	27	77	9	40	15	5	19	3	31	20	61	17	21	12	4
TcCLB.505317.9		23	21	2								2	1	28	30	10		23	41	16		29	35	8	22	18	11	6		14	50	7	26			9		15	5	46
TcCLB.506975.80	Yes	23	20	3												013-010-022				16		29	35	8	22	18		6		14		7	26			9	40	15	5	46	3	38	20		17	21	12	4
TcCLB.504723.20001		23	20	3																16		29	35	8	22	18	11	6		14	36	7	26			9		15	5	46	3	38	20		17	21	12	004-012
TcCLB.504769.190		23	20	3							089-067	2	1	28	030-062			23		16		29	35		22	18		6	55	14	50	7	26			9		15	5		3						12	4
TcCLB.506841.20		23	20	3										28	30	10				16		29	035-079		22	18				14	36	7	26			9	40	15	5	46	3		20		17	21
TcCLB.507979.30	Yes	23	19	4												010-022				16		29	35	8	22	18		6		14		7	26			9		15	5	46	3	38	20		17	21	12	4
TcCLB.511323.10	Yes	23	19	4												010-022				16		29	35	8	22	18		6		14		7	26			9		15	5	46	3	38	20		17	21	12	4
TcCLB.508913.10		23	19	4												010-022				16		29	35	8	22	18		6		14		7	26			9		15	5	46	3	38	20		17	21	12	4
TcCLB.451951.20001		23	19	4																							11	6	49	78	36	7	44	27	77	9	40	15	5	19	3	31	20	61	17	21	12	4	048-056
TcCLB.461833.20001		23	19	4							041-067	2	1	28	30	10	72	23	41	16		29	35	8	22	18	11	6	55	14	50	7	26	84
TcCLB.401961.10		23	19	4																				8	47	18	11	6	49	78	36	7	44	27	77	9	40	15	5	19	3	31	20	61	17	21
TcCLB.508511.49		23	18	5								2	1	28	60	10	32	56	74	16		29	35	008-078		18	11	6		14	36	7	44	27	77	9	40
TcCLB.458369.10		23	17	6																						18	11	6	55	14	50	7	26	84		9		15	5	46	3	38	20	62	17	21	12	4
TcCLB.509031.3		23	17	6										28	60	10	32	56	74	16		29	35	8	47	18	11	6	49	14	36	7	44	27	77	9	40
TcCLB.510711.10		23	16	7																				8	22		11	6	55	14	50	7	26	84		9		15	5	46	3	38	20	62	17	21	34	4	43
TcCLB.504737.10		23	15	8																					22		11	6	55	14	50	7	26	84		9		15	5	46	3	38	20	62	17	21	34	4	43
TcCLB.504491.20		23	15	8																						18	11	6	55	14	50	7	26	84		9		15	5	46	3	38	20		17		34	4	43
TcCLB.510495.30		22	22	0																														27	77	9	40	15	5	19	3	31	20	61	17	21	12	4	48
TcCLB.509429.10		22	21	1								2	1	028-062				23	41	16		29	35		22			6	55	14		7	26			9		15	5		3	31					12	4
TcCLB.511255.430		22	20	2								2	1	28			32		41	016-014						18		6		14		7	26			9	40	15	5	19	3		20		17	21	12	004-021
TcCLB.505037.157		22	20	2										28	030-062			23		16		29	35		22			6	55	14	50	7	26			9		15	5		3	31	20				12	4
TcCLB.506595.100070		22	20	2								2	001-062						41	16		29	35		22	18	11	6	55		50	7	26			9		15	5		3	31	20				12	4
TcCLB.474045.20001		22	20	2																						18	11	6	49	14	36	7	44	27	77	9	40	15	5	19	3	31	20	61	17	21	12
TcCLB.435835.20001		22	20	2																						18	11	6	49	14	36	7	44	27	77	9	40	15	5	19	3	31	20	61	17	21	12
TcCLB.508717.60		22	20	2										28	30	10				16		29			22	18				14	36	7	26			9	40	15	5	46	3		20		17	21		004-030
TcCLB.511855.10		22	20	2																									49	14	36	7	44	27	77	9	40	15	5	19	3	31	20	61	17	21	12	4	48
TcCLB.511413.19		22	19	3								2	1	028-099	30	10		23	41	16	70	29	35	8	22	18	11	6	55	14	50	7	26	84
TcCLB.436383.20001		22	19	3		053-089					67	2	1	28	30	10		23	41	16			35	8	22	18	11	6	55	14	50	7	26	84
TcCLB.404925.20001		22	19	3												10	32	56		16		29	35	8	22	18	11	6		78	36	7	44	27	77	9	40	15	5	19
TcCLB.473167.20001		22	19	3																							11	6	49	78	36	7	44	27	77	9	40	15	5	19	3	31	20	61	17	21	12	4
TcCLB.506967.1000150		22	19	3							062-067	2	1	28				23		016-001				8	22					14		7		27		9	40	15	5	19	3		20		17	21	12	004-036-016
TcCLB.421121.20001		22	18	4																16		29	35	8	68	18	11	37		14	36	7	44		77	9	82	15	5	19	3	31	20		17
TcCLB.432995.9		22	18	4															41	16		29	35	8	22	18	11	6	55	14	50	7	26	84		9		15	5	46	3	38	20
TcCLB.506103.20001		22	17	5								2	1	28		10	39	079-078								18	11	37		14	36	7	44			9		15	5	19	3	31	20		17	93
TcCLB.474275.20001		22	17	5																								37		14	36	7	44	27		9	82	15	5	19	3	31	20		17	93	12	4	48
TcCLB.451175.20001		22	17	5																	70	29	35	8	22		11	6	55	14	50	7	26	84		9		15	5	46	3	38	20	62	17
TcCLB.467131.20001		22	17	5																			35	8	22	18	11	6	55	14	50	7	26	84		9		15	5	46	3	38	20	62	17	21
TcCLB.439991.10		22	17	5												10	32	56		16		29	35	8	47	18	11	6	49	78	36	7	44	27	77	9	40	15	5
TcCLB.507997.14		22	16	6								2	1	028-095		10	42	86						8	83	18	11	6	49	14	36	7	26			9	82	15	5	19	3
TcCLB.398265.9		22	16	6								2	1		60	10	32	56	74	16		29	35	8	47	18	11	6	49	14	36	7	44	27	77
TcCLB.511123.11		22	16	6								2	1	28	60	10	32	56	74	16		29		8	22	18	11	6	49	78	36	7	44	27	77
TcCLB.510377.500		22	15	7								2	1	28	60	10	32	56	74	16		29	35	8	47	18	11	6	49	78		7	44	27	77
TcCLB.439803.9		22	14	8																							11	37		14	36	7	44			9		15	5	19	3	31	20		17	93	12	4	80
TcCLB.478985.20001		22	14	8																							11	6	55	14	50	7	26	84		9		15	5	46	3	38	20	62	17	21	34	4	43
TcCLB.510401.50		22	14	8																													44	27		9	82	15	5	19	3	31	20		17	93	12	4	48
TcCLB.507835.10		22	14	8																													44	27		9	82	15	5	19	3	31	20		17	93	12	4	48
TcCLB.508221.1000310		21	21	0								2	1	28			32			16						18		6		14		7	26			9	40	15	5	19	3		20		17	21	12	4
TcCLB.503957.25		21	21	0								2	1	28	30	10			41	16			35		22	18		6	55	14		7	26			9		15	5		3	31	20
TcCLB.471577.20001		21	21	0																														27	77	9	40	15	5	19	3	31	20	61	17	21	12	4
TcCLB.506767.1000250		21	21	0								2	1	28	30					16				8	22	18				14				27		9	40	15	5	19	3		20		17	21	12	4
TcCLB.510025.1000250		21	21	0								2	1	28	30					16				8	22					14		7	26			9	40	15	5	19	3		20		17	21	12	4
TcCLB.425597.10		21	20	1								2	1	28	30	10		23		16		29	35	8	22	18	11	6	55	14		7	26	84		9		15
TcCLB.507771.120		21	20	1								2	1	28	30	10		23	41	16		29	35	8	22	18	11	6		14	50	7				9		15	5
TcCLB.506101.100020		21	20	1								2	1	28		10			41	016-014						18				14		7	26			9	40	15	5	19	3		20		17	21	12	4
TcCLB.506499.100030		21	20	1								2	1	28										8	22	18				14		7	26			9	40	15	5	19	3		20		17	21	12	4
TcCLB.509559.40		21	19	2								2	1	28	30	10		23	41	16		29	035-021		22	18	11	6	55		50	7	26			9		15	5
TcCLB.927768.50		21	19	2							67					10				16		29		8	22			6		14	36	7	26			9	40	15	5	46	003-022				17	21	12	4
TcCLB.507591.15		21	19	2										28	030-062			23		16		29	35		22	18	11	6	55		50	7	26			9		15	5		3	31					12	4
TcCLB.511183.1000300		21	19	2								2	1	28	30	10	72	23	41	16	70	29	35	8	22	18	11	6	55	14	50	7
TcCLB.511183.505		21	19	2								2	1	28	30	10	72	23	41	16	70	29	35	8	22	18	11	6	55	14	50	7
TcCLB.414755.20001		21	19	2											30	10		23	41	16		29	35	8	22	18	11	6	55	14	50	7	26	84		9		15	5
TcCLB.510547.30		21	19	2								2	1	28	30	10	72	23	41	16	70	29	35	8	22	18	11	6	55	14	50	7
TcCLB.507957.140		21	19	2								2	1	028-069						16				8	22	18				14		7	26			9	40	15	5	19	3		20		17	21	12	004-016
TcCLB.508157.50		21	19	2																											36	7	44	27	77	9	40	15	5	19	3	31	20	61	17	21	12	4	48
TcCLB.508521.11		21	18	3								2	1	028-050				079-062	41	16		29	35		22	18	11	6	55	14	50	7	26			9		15	5		3
TcCLB.927873.50		21	18	3												010-005				16		29	35	8	22	18		6		14		7	26			9		15	5	46	3				17	21	12	004-011
TcCLB.927873.40		21	18	3												010-005				16		29	35	8	22	18		6		14		7	26			9		15	5	46	3				17	21	12	004-011
TcCLB.442597.20001		21	18	3									1	28	30	10	72	23	41	16	70	29	35	8	22		11	6	55	14	50	7	26	84
TcCLB.488591.20001		21	18	3														23	41	16		29	35	8	22	18	11	6	55	14	50	7	26	84		9		15	5	46	3
TcCLB.470893.20001		21	18	3																					22	18	11	6	49	78	36	7	44	27	77	9	40	15	5	19	3	31	20	61	17
TcCLB.472609.20001		21	18	3												10		23	41	16		29	35	8	22	18	11	6	55	14	50	7	26	84		9		15	5	46
TcCLB.509437.125		21	18	3										28	030-062			23					35		22	18	11		55		50	7	26			9		15	5		3	31	20				12	4
TcCLB.436079.20001		21	17	4																				8	83	18	11	6	49	14	36	7	26			9	82	15	5	19	3	89	20		17	21	12
TcCLB.474465.20001		21	16	5																			35	8	22		11	6	55	14	50	7	26	84		9		15	5	46	3	38	20	62	17	21
TcCLB.411763.20001		21	16	5																					22	18	11	6	55	14	50	7	26	84		9		15	5	46	3	38	20	62	17	21	12
TcCLB.424171.10		21	16	5														56		16		29	35	8	47	18	11		49	78	36	7	44	27	77	9	40	15	5	19	3
TcCLB.509927.10		21	15	6								2	1	028-089		10	54			16		29	35	8	68	18	11	37		14	36	7	44		77	9	82	15
TcCLB.482061.20001		21	15	6																								6	55	14	50	7	26	84		9		15	5	46	3	38	20	62	17	21	12	4
TcCLB.422843.10		21	15	6																					22	18	11			14	50	7	26	84		9		15	5	46	3	38	20	62	17	21	12	4
TcCLB.506157.40		21	14	7																								6	55	14	50	7	26	84		9		15	5	46	3	38	20	62	17	21	34	4	43
TcCLB.511889.11		21	14	7																								6	55	14	50	7	26	84		9		15	5	46	3	38	20	62	17	21	34	4
TcCLB.418303.20001		21	14	7																							11	6	55	14	50	7	26	84		9		15	5	46	3	38	20	62	17	21	34	4	43
TcCLB.507075.30		21	14	7																														27		9	82	15	5	19	3	31	20		17	93	12	4	48
TcCLB.510569.10		21	13	8																								6	55	14	50	7	26	84		9		15	5	46	3	38	20		17		34	4	43
TcCLB.455829.20001		21	13	8																								6	55	14	50	7	26	84		9		15	5	46	3	38	20	62	17	21	34	4	43
TcCLB.411019.20001		21	11	10																										78	50	7	26	84		9		15	5	46	3	38	20	62	17	21	34	4	43
TcCLB.439515.20001		20	20	0																															77	9	40	15	5	19	3	31	20	61	17	21	12	4	48
TcCLB.504081.100030		20	19	1								2	001-004				32			16				8		18		6		14		7	26			9	40	15		19	3				17	21	12	4
TcCLB.510431.300		20	19	1										28	30	10		23	41	16		29	35	8	22	18	11	6		14	50	7	26			9		15	5
TcCLB.433673.20001		20	19	1								2	1	28	30	10		23	41	16		29	35	8	22	18	11	6	55	14	50	7	26
TcCLB.478071.20001		20	19	1												10		23	41	16		29	35	8	22	18	11	6	55	14	50	7	26			9		15	5	19
TcCLB.505363.19		20	19	1								2	1	28	30	10		23	41	16	70	29	35	8	22	18	11	6	55	14	50	7
TcCLB.430423.20001		20	19	1	66	53	45			081-028-089	67	2	1	28	30	10		23	41	16	70	29	35	8	22	18	11
TcCLB.510377.1000300		20	19	1								2	1	28						16				8	22	18				14		7	26			9	40	15	5	19	3		20		17	21		004-016
TcCLB.510375.100020		20	19	1								2	1	28	30									8	22					14		7	26			9	40	15	5	19	3		20		17	21	12	004-016
TcCLB.506765.58		20	19	1								2	1	28	30									8	22					14		7		27		9	40	15	5	19	3		20		17	21	12	004-087
TcCLB.510377.210		20	19	1								2	1	28						16					22					14		7	26			9	40	15	5	19	3		20		17	21	12	4
TcCLB.511487.1000130		20	18	2								2	1	28					41	016-014						18		6		14		7	26			9	40	15	5	19	3		20			21	12	004-021
TcCLB.510081.100040		20	18	2								2	1	028-099	30	10		23	41	16	70	29	35	8	22	18	11	6	55	14	50	7
TcCLB.505795.20001		20	18	2															062-041	16		29	35		22	18		6	55		50	7	26			9		15	5		3	31	20				12	4
TcCLB.435601.20001		20	18	2											30	10		23	41	16	70	29	35	8	22	18	11	6	55	14	50	7	26	84		9
TcCLB.510487.100037		20	18	2								2	1	28	30	10	72	23	41	16	70	29	35	8	22		11	6	55	14	50	7
TcCLB.510275.1000160		20	18	2								2	1	28	30	10	72	23		16	70	29	35	8	22	18	11	6	55	14	50	7
TcCLB.406929.20001		20	18	2																											36	7	44	27	77	9	40	15	5	19	3	31	20	61	17	21	12	4	48
TcCLB.470827.20		20	17	3																						18	11	6		14	50	7	26			9		15	5	46	3	31	20	62	17	21	12	4
TcCLB.478711.20001		20	17	3																						18	11	6	55	14	50	7	26			9		15	5	19	3	38	20	62	17	21		4
TcCLB.474015.20001		20	17	3											30	10	72	23	41	16	70	29	35	8	22	18	11	6	55	14	50	7	26	84
TcCLB.505589.20001		20	17	3											30	10	72	23	41	16	70	29	35	8	22	18	11	6	55	14	50	7							5										43
TcCLB.480493.20001		20	16	4																16		29	35	8	22	18	11	6	55	14	50	7	26	84		9		15	5	46	3	38
TcCLB.450661.20001		20	16	4																					47			6	49	78	36	7	44	27	77	9	40	15	5	19	3	31	20	61	17	21
TcCLB.435051.20001		20	15	5																					68	18	11	37		14	36	7	44	27		9	82	15	5	19	3	31	20		17	93	12
TcCLB.440219.20001		20	15	5													32	88		16	90	29	35	8	68	18	11	37		14	36	7		27		9	82	15	5	19
TcCLB.472887.20001		20	15	5													32	56	74	16		29	35	8	47	18	11	6	49	14	36	7	44	27	77	9	40
TcCLB.487455.20001		20	15	5																									49	14	36	7		27		9	82	15	5	19	3	31	20		17	93	12	4	48
TcCLB.508739.11		20	14	6								2	1	028-029		010-029		079-078								18	11	37		14	36	7	44					15	5	19	3	31	20	62	17
TcCLB.508529.40		20	14	6								2	1			10	39	079-078								18	11	6	49	14		7	44			009-005		15	5		3	31			17	93	12
TcCLB.486951.20001		20	14	6																					22		11	6	55	14	50	7	26	84		9		15	5	46	3	38	20	62	17	21	34
TcCLB.422127.20001		20	14	6																						18	11	6	55	14	50	7	26	84		9		15	5	46	3	38	20	62	17	21	34
TcCLB.442721.20001		20	14	6																									55	14	50	7	26	84		9		15	5	46	3	38	20	62	17	21	12	4
TcCLB.508703.20		20	13	7																																9	82	15	5	19	3	31	20		17	93	12	4	48
TcCLB.504081.1000450		19	19	0								2	1	28						16					22			6		14			26			9	40	15	5	19	3		20		17	21	12	4
TcCLB.508221.1000697		19	19	0								2	1	28					41	16						18		6		14		7				9		15	5	19	3		20		17	21	12	4
TcCLB.508221.1050		19	19	0																															77	9	40	15	5	19	3	31	20	61	17	21	12	4	48
TcCLB.416015.20001		19	19	0									1	28			32		41	16				8						14		7	26			9	40	15	5	19	3		20		17	21	12
TcCLB.510279.263		19	18	1								2	1	28	30	10	72	23	41	16	70	29	35	8	22		11	6	55	14		7
TcCLB.505403.20001		19	18	1																			35		22	18	11	6	55	14		7	26			9		15	5		3	31	20				12	4
TcCLB.510013.270		19	18	1								2	1	28						16				8	22					14		7	26			9	40	15	5	19	003-014				17	21	12	4
TcCLB.479867.20001		19	18	1	66	53	45	85	71	081-089		2	1	28	30	10		23	41	16		29	35	8	22	18
TcCLB.457977.20001		19	18	1																													44	27	77	9	40	15	5	19	3	31	20	61		21	12	4	48
TcCLB.509657.70		19	18	1																												7	44	27	77	9	40	15	5						17	21	12	4	48
TcCLB.927252.80		19	17	2												005-010				16				8	22	18	11	6		14		7	26			9		15	5	19	3		20		17		12	004-018
TcCLB.438073.20001		19	17	2												056-010		23	41	16		29	35	8	22	18	11	6		14	50	7	26			9		15	5	19
TcCLB.494759.20001		19	17	2														23	41	16		29	35	8	22	18	11	6	55	14	50	7	26	84		9		15	5
TcCLB.506245.76		19	17	2								2	1	28	30	10	72	23	41	16	70	29	35	8	22	18		6	55	14	50
TcCLB.504239.1000120		19	17	2								2	1	28						016-015				8	22					14		7	26			9	40	15	5	19	003-011-014				17	21	12	4
TcCLB.506187.80		19	17	2																											36	7	44	27	77		40	15	5	19	3	31	20		17	21	12	4	48
TcCLB.505401.31		19	16	3																							11	37		14	36	7	44	27		9	40	15				31	20	62	17	21	12	4
TcCLB.508859.118		19	16	3												013-010-022				16		29	35	8	22	18		6		14	36	7	26			9		15	5	46	3	38	20
TcCLB.446785.20001		19	16	3																					22	18		6		14		7	26			9	40	15	5	46	3	38	20		17	21	12	4
TcCLB.465555.20001		19	15	4																							11	37		14	36	7	44		77	9	82	15	5	19	3	31	20		17		12	004-066
TcCLB.509373.100010		19	15	4																							11	37		14	36	7	44		77	9	82		5	19	3	31	20		17	93	12	4
TcCLB.460665.20001		19	15	4												10		23	041-087				35	8	22	18	11	6	55	14	50	7	26	84		9		15	5	46
TcCLB.406683.20001		19	15	4																				8	47	18	11	6	49	78	36	7	44	27	77	9	40	15	5	19	3	31
TcCLB.445087.20001		19	15	4																		29	35	8	22	18	11	6	55	14	50	7	26	84		9		15	5	46	3	38
TcCLB.504081.9		19	15	4								2	1	28	60	10	32	56		16		29	35	8	47	18	11	6	49	14	36	7
TcCLB.508745.11		19	15	4								2	1	28	60	10	32	56		16		29	35	8	22	18	11	6	49	78	36	7
TcCLB.509133.10		19	14	5												10	39					029-079-078				18	11	37		14	36	7	44			9		15	5	19	3	31	20	62	17
TcCLB.507445.100020		19	14	5																								37		14	36	7	44			9		15	5	19	3	31	20			93	12	4	48
TcCLB.423791.20001		19	14	5							67	2	1	28					74	16		29	35	008-078		18	11	6	49	14	36	7	44	27	077-060-010-032
TcCLB.399173.20001		19	14	5													32	56	74	16		29	35	8	47	18	11	6	49	14	36	7	44	27	77	9
TcCLB.479221.20001		19	14	5													32	56		16		29	35	8	47	18	11	6	49	78	36	7	44	27	77	9	40
TcCLB.413445.20001		19	14	5														86						8	83	18	11	6	49	14	36	7	26			9	82	15	5	19	3	89	20
TcCLB.503609.10		19	14	5								2	1	28	60	10	32	56		16		29	35	8	47	18	11	6	49	78	36	7
TcCLB.449167.20001		19	13	6																								37		14	36	7	044-060			9		15	5	19	3	31	20		17	93	12	4	80
TcCLB.504239.1000434		19	13	6								2	1	28	60	10	32	56	74	16		29	35	8	47	18	11	6	49	78	36
TcCLB.404169.20001		19	13	6														56	74	16		29		8	47	18	11	6	49	78	36	7	44	27	77	9	40	15
TcCLB.440083.20001		19	13	6								2	1	28	60	10	32	56	74	16		29	35	8	47	18	11	6	49	78	36
TcCLB.455171.9		19	13	6									1	28	60	10	32	56	74	16		29	35	8	47	18	11	6	49	78	36	7
TcCLB.431681.20001		19	13	6													32	56	74	16		29		8	47	18	11	6	49	78	36	7	44	27	77	9	40
TcCLB.461945.20001		19	13	6																									55	14	50	7	26	84		9		15	5	46	3	38	20	62	17	21	12
TcCLB.479449.20001		19	13	6																									55	14	50	7	26	84		9		15	5	46	3	38	20	62	17	21	34	4
TcCLB.509549.140		19	12	7																																	82	15	5	19	3	31	20		17	93	12	4	48
TcCLB.511599.10		18	18	0																															77	9	40	15	5	19	3	31	20	61	17	21	12	4	48
TcCLB.507699.230		18	18	0																																9	40	15	5	19	3	31	20	61	17	21	12	4	48
TcCLB.474959.20001		18	18	0																																	40	15	5	19	3	31	20	61	17	21	12	4
TcCLB.508225.4		18	17	1								2	1	028-099	30	10		23	41	16	70	29	35	8	22	18	11	6	55	14
TcCLB.927566.40		18	17	1												10				16		29		8	22			6		14	36	7	26			9		15	5		003-078				17	21		4
TcCLB.458685.20001		18	17	1																																		15	005-063	19	3	31	20	61	17	21	12	4	48
TcCLB.457449.20001		18	17	1																														27	77	9	40	15	5	19	3	31	20	61	17	21	12	4	48
TcCLB.424145.20001		18	17	1																												7	44	27	77	9	40	15	5	19	3	31	20	61	17	21	12	4	48
TcCLB.452163.20001		18	17	1																													44	27	77	9	40	15	5	19	3	31	20	61	17	21	12	4	48
TcCLB.508229.10		18	17	1																														27	77	9	40	15	5	19	3	31	20	61	17	21	12	4	48
TcCLB.484097.20001		18	17	1																											36	7	44	27	77	9	40	15	5	19	3	31	20	61	17	21	12	4
TcCLB.927774.80		18	16	2												10				16		29		8	22	18		6		14	36	7	26			9			5		003-050				17	21	12	004-067-011
TcCLB.413125.20001		18	16	2																16	70	29	35	8	22	18	11	6	55	14	50	7	26	84		9		15	5
TcCLB.444175.20001		18	16	2															41	16	70	29	35	8	22	18	11	6	55	14	50	7	26	84		9		15
TcCLB.511183.116		18	16	2											30	10	72	23	41	16	70	29	35	8	22	18	11	6	55	14	50	7
TcCLB.504155.250		18	16	2											30	10	72	23	41	16	70	29	35	8	22	18	11	6	55	14	50	7
TcCLB.510699.34		18	16	2											30	10	72	23	41	16	70	29	35	8	22	18	11	6	55	14	50	7
TcCLB.508165.430		18	16	2																												7	44	27	77	9	40	15	5	19	3	31	20	61		21	12	4
TcCLB.405505.20001		18	15	3																								37		14	36	7		27		9	82	15	5	19	3	31	20		17	93	12	4	48
TcCLB.445687.20001		18	15	3																				8	68	18	11	37		14	36	7		27		9	82	15	5	19	3	31	20		17
TcCLB.427839.20001		18	15	3																						18	11	37		14	36	7	44			9		15	5	19	3	31	20		17	93	12	4
TcCLB.460625.9		18	15	3																16		29		8	22	18	11	6	49	78	36	7	44	27	77	9	40	15	5
TcCLB.473417.20001		18	15	3																							11	6	49	78	36	7	44	27		9	40	15	5	19	3	31	20	61	17
TcCLB.447435.20001		18	15	3																								6	49	78	36	7	44	27	77	9	40	15	5	19	3	31	20	61	17
TcCLB.457601.20001		18	15	3																	70	29	35	8	22	18	11	6	55	14	50	7	26	84		9		15	5	46
TcCLB.506685.5		18	15	3																									49	14	36	7	44		77	9	82	15	5	19	3	31	20		17		12	4
TcCLB.450963.20001		18	14	4																					68	18	11	37		14	36	7		27		9	82	15	5	19	3	31	20		17	93
TcCLB.471571.20001		18	14	4																16		29	35	8	68	18	11	37		14	36	7	44		77	9	82	15	5	19
TcCLB.428913.20001		18	14	4																16	90	29	35	8	68	18	11	37		14	36	7		27		9	82	15	5	19
TcCLB.415797.20001		18	14	4																				8	22	18	11	6	55	14	50	7	26	84		9		15	5	46	3	38	20
TcCLB.434545.20001		18	14	4																						18	11	6	55	14	50	7	26	84		9		15	5	46	3		20	62	17	21
TcCLB.510803.19		18	14	4								2	1	28	60	10	32	56	74	16		29	35	8	47	18	11	6		14	36
TcCLB.434505.20001		18	14	4												10	32	56		16		29	35	8	22	18	11	6	49	78	36	7	44	27	77
TcCLB.439289.20001		18	14	4																				8	22	18	11	6	55	14	50	7	26	84		9		15	5	46	3	38	20
TcCLB.402115.20001		18	14	4																				8	22	18	11	6	55	14	50	7	26	84		9		15	5	46	3	38	20
TcCLB.451103.20001		18	14	4																						18	11	6	55	14	50	7	26	84		9		15	5	46	3	38	20		17	21
TcCLB.511595.100010		18	14	4																										14	36	7	44		77	9	82	15	5	19	3	31	20		17	93	12	4
TcCLB.454281.20001		18	13	5								2	1	28	60	10	32	56	74	16		29	35	8	47	18	11	6	49	14
TcCLB.462823.20001		18	13	5								2	1	28	60	10	32	56	74	16		29	35	8	47	18	11	6	49	14
TcCLB.509345.100030		18	12	6																								37		14	36	7	44			9		15	5	19	3	31	20			93	12	004-002-061
TcCLB.506393.40		18	12	6								2	1	28	87	10	54	96		16	90	29	35	8	68	18	11	37		14	36
TcCLB.507835.100035		18	12	6								2	1	28	87	10	54	96		16	90	29	35	8	68	18	11	37		14	36
TcCLB.508831.190		18	12	6								2	1	28	87	10	54	96		16	90	29	35	8	68	18	11	37		14	36
TcCLB.487677.20001		18	12	6																																9		15	5	19	3	31	20		17	93	12	4	80
TcCLB.451727.20001		18	12	6																										14	50	7	26	84		9		15	5	46	3	38	20		17	21	34	4	43
TcCLB.398827.20001		18	12	6																														27		9	82	15	5	19	3	31	20		17	93	12	4	48
TcCLB.475027.20001		18	11	7																									55	14	50	7	26	84		9		15	5	46	3	38	20	62	17	21	34		43
TcCLB.430499.20001		18	10	8																													26	84		9		15	5	46	3	38	20	62	17	21	34	4	43
TcCLB.509313.9		18	10	8																											50	7	26	84		9		15	5	46	3	38	20	62	17	21	34	4	43
TcCLB.418021.20001		17	16	1									1	028-099	30	10		23	41	16	70	29	35	8	22	18	11	6	55	14
TcCLB.410269.20001		17	16	1											30	10		23	41	16	70	29	35	8	22	18	11	6	55	14	50	7
TcCLB.452095.20001		17	16	1										28	30	10		23	41	16		29	35	8	22	18	11	6	55	14	50	7
TcCLB.410775.20001		17	16	1															41	16		29	35	8	22	18	11	6	55	14	50	7	26			9		15	5
TcCLB.462521.20001		17	16	1											30	10		23	41	16	70	29	35	8	22	18	11	6	55	14	50	7
TcCLB.404241.20001		17	16	1	66	53	45			081-028-089		2	1	28	30	10		23	41	16		29	35	8	22	18
TcCLB.507981.10		17	16	1																															77	9	40	15	5	19	3	31	20	61	17	21	12	4	48
TcCLB.469059.20001		17	15	2																								6		78	36	7	44	27	77	9	40	15	5	19	3	31	20	61	17
TcCLB.425751.20001		17	15	2											30	10	72	23	41	16	70	29	35	8	22		11	6	55	14	50	7
TcCLB.506067.189		17	15	2											30	10	72	23	41	16	70	29	35	8	22		11	6	55	14	50	7
TcCLB.454449.20001		17	15	2											30	10	72	23	41	16	70	29	35	8	22	18		6	55	14	50	7
TcCLB.417871.20001		17	15	2												10		23	41	16		29	35	8	22	18	11	6	55	14	50	7	26	84
TcCLB.403773.20001		17	15	2															41	16	70	29	35	8	22	18	11	6	55	14	50	7	26	84		9
TcCLB.404711.20001		17	15	2	081-081-081-066	53	45	85	71	081-028-089		2	1	28	30	10		23	41	16		29	35	8
TcCLB.507987.10		17	15	2																														27	77	9	40	15	5	19	3	31	20	61	17	21	12	004-090
TcCLB.509663.47		17	15	2																										14	36	7	44		77	9	82	15	5	19	3	31	20		17		12	4
TcCLB.466383.20001		17	15	2																										14	36	7		27		9	82	15	5	19	3	31	20		17	93	12	4	48
TcCLB.507203.5		17	14	3																							11	37		14	36	7	44	27		9	40	15				31	20	62	17	21	12	4
TcCLB.421969.20001		17	14	3												056-010	072-016		41	16	70	29	35	8	22	18	11	6	55	14	50	7	26
TcCLB.497115.20001		17	14	3																					47	18	11	6	49	14	36	7	44	27	77	9	40	15	5	19	3
TcCLB.429309.20001		17	14	3																		29	35	8	22	18	11	6	55	14	50	7	26	84		9		15	5	46
TcCLB.472369.20001		17	14	3																		29	35	8	22	18	11	6	55	14	50	7	26	84		9		15	5	46
TcCLB.487309.20001		17	14	3																							11	6	49	78	36	7	44	27	77	9	40	15	5	19	3	31	20
TcCLB.442321.20001		17	14	3																				8	22	18	11	6	49	78	36	7	44	27	77	9	40	15	5	19
TcCLB.418501.20001		17	14	3								2	1	28	60	10	32	56	74	16		29	35	8	22	18	11	6		14
TcCLB.483183.10		17	14	3																											36	7		27		9	82	15	5	19	3	31	20		17	93	12	4	48
TcCLB.511663.40		17	13	4																							11	37		14	36	7	44	27		9	40	015-099				31	20	62	17	21	12	4
TcCLB.438239.20001		17	13	4																16	90	29	35	8	68	18	11	37		14	36	7		27		9	82	15	5
TcCLB.506253.39		17	13	4								2	1	28		10	039-060	079-078								18	11	6	49	14	36	7	44			9		15	5
TcCLB.424261.20001		17	13	4																							11	6	49	14	36		044-014					15	5	19	3	31	20		17	93	12	4	80
TcCLB.472137.20001		17	13	4																							11	6	55	14		7	26	84		9		15	5	46	3	38	20	62	17	21
TcCLB.425589.20001		17	13	4															74	16		29	35	8	47	18	11	6	49	14	36	7	44	27	77	9
TcCLB.404317.20001		17	13	4																				8	47	18	11	6	49	78	36	7	44	27	77	9	40	15	5	19
TcCLB.495625.20001		17	13	4																					22	18	11	6	55	14	50	7	26	84		9		15	5	46	3	38	20
TcCLB.434535.20001		17	13	4																				8	83	18	11	6	49	14	36	7	26			9	82	15	5	19	3	89
TcCLB.510921.40		17	13	4								2	1	28	60	10	32	56		16		29	35	8	22	18	11	6	49	78
TcCLB.507229.25		17	13	4																				8			011-036		49	14	36		44	27		9	40	15				31	20	62	17	21	12	4
TcCLB.427125.20001		17	12	5									1	28	87	10	32	88		16	90	29	35	8	68	18	11	37		14	36
TcCLB.505177.20001		17	12	5								028-002	1	28		10	039-037	79								18	11	6	49	14		7	44			9		15	5	19
TcCLB.448653.20001		17	12	5														56	74	16		29	35	008-078		18	11	6	49	14	36	7	44	27	77	9
TcCLB.486023.20001		17	12	5							089-067	2	1	28	60	10	32	56	74	16		29	35	8	47	18	11	6
TcCLB.503429.39		17	12	5								2	1	28	60	10	32	56		16		29	35	8	47	18	11	6	49	78
TcCLB.431331.20001		17	12	5								2	1	28	60	10	32	56	74	16		29	35	8	47	18	11	6	49
TcCLB.476455.20001		17	12	5											60	10	32	56	74	16		29	35	8	47	18	11	6	49	14	36	7
TcCLB.509971.90		17	12	5								2	1	28	60	10	32	56	74	16		29	35	8	47	18	11	6	49
TcCLB.507731.50		17	12	5								2	1	28	60	10	32	56	74	16		29	35	8	47	18	11	6	49
TcCLB.439707.20001		17	12	5																						18	11	6	55	14	50	7	26	84		9		15	5	46	3	38	20	62
TcCLB.404455.20001		17	12	5																								6	55	14	50	7	26	84		9		15	5	46	3	38	20	62	17	21
TcCLB.435797.20001		17	12	5																								6	55	14	50	7	26	84		9		15	5	46	3	38	20	62	17	21
TcCLB.437379.20001		17	12	5																										14	50	7	26			9		15	5	46	3	38	20	62	17	21	12	4
TcCLB.485675.20001		17	12	5					013-071-089		67	2	1	28	60	10	32	56	74	16		29	35	8	47	18	11
TcCLB.509033.10		17	11	6								2	1		87	10	54	96		16	90	29	35	8	68		11	37		14	36	7
TcCLB.474079.20001		17	11	6								2	1	28	87	10	32	88		16	90	29	35	8	68	18	11	37		78
TcCLB.439229.20001		17	11	6														96		16	90	29	35	8	68	18	11	37		14	36	7	44	27		9	82
TcCLB.464493.20001		17	11	6																				008-061		18	11	6	49	14		7	44			009-005		15	5		3	31	20	62		93	12
TcCLB.434251.20001		17	10	7																												7	26	84		9		15	5	46	3	38	20	62	17	21	34	4	43
TcCLB.435839.20001		17	10	7																													26	84		9		15	5	46	3	38	20	62	17	21	34	4	43
TcCLB.427013.20001		17	10	7																												7	26	84		9		15	5	46	3	38	20	62	17	21	34	4	43
TcCLB.478465.20001		17	10	7																													26	84		9		15	5	46	3	38	20	62	17	21	34	4	43
TcCLB.415197.20001		17	10	7																													26	84		9		15	5	46	3		20	62	17	21	34	4	43
TcCLB.404431.10		17	9	8																														84		9		15	5	46	3	38	20	62	17	21	34	4	43
TcCLB.459705.20001		16	16	0								2	1	28	30	10		23	41	16		29	35	8	22	18	11	6	55
TcCLB.510171.10		16	16	0								2	1	28	30	10		23	41	16		29	35	8	22	18	11	6		14
TcCLB.510365.10		16	16	0								2	1	28	30	10		23	41	16		29	35	8	22	18	11	6	55
TcCLB.417151.20001		16	16	0																														27	77	9	40	15	5	19	3	31	20	61	17	21	12	4	48
TcCLB.485783.20001		16	16	0																														27	77	9	40	15	5	19	3	31	20	61	17	21	12	4	48
TcCLB.403031.20001		16	15	1												10		23	41	16		29	35	8	22	18	11	6	55	14	50	7	26
TcCLB.508285.5		16	15	1																					22	18	11	6	55		50	7	26			9		15	5		3	31	20				12	4
TcCLB.445705.20001		16	15	1																												7	44	27	77	9	40	15	5	19	3	31	20	61	17	21	12
TcCLB.432741.20001		16	15	1																																9	40	15	5	19	3	31	20	61	17	21	12	4	48
TcCLB.415497.20001		16	14	2																								37		14	36	7		27		9		15	5	19	3	31	20		17	93	12	4
TcCLB.467519.20001		16	14	2									1	28	30	10		23	41	016-044		29	35	8	22		11	6	55	14	50
TcCLB.451853.20001		16	14	2																		29	35	8	22	18	11	6	55	14	50	7	26	84		9		15	5
TcCLB.476121.20001		16	14	2													72	23	41	16	70	29	35	8	22	18	11	6	55	14	50	7
TcCLB.413409.20001		16	14	2																							11	6		14	36	7	26			9	82	15	5	19	3	89	20		17	21
TcCLB.506131.161		16	14	2											30	10	72	23		16	70	29	35	8	22		11	6	55	14	50	7
TcCLB.409613.20001		16	14	2																16	70	29	35	8	22	18	11	6	55	14	50	7	26	84		9
TcCLB.415475.20001		16	14	2												10	72	23	41	16	70	29	35	8	22	18	11	6	55	14	50
TcCLB.464517.20001		16	14	2															41	16		29	35	8	22	18	11	6	55	14	50	7	26	84		9
TcCLB.503827.50		16	14	2											30	10	72	23		16	70	29	35	8	22	18	11		55	14	50	7
TcCLB.451729.20001		16	13	3														079-078								18	11	37		14	36		44			9		15	5	19	3	31	20		17	21
TcCLB.415331.20001		16	13	3																								37		14	36	7	44	27		9	40	015-099				31	20			21	12	4
TcCLB.398993.20001		16	13	3																				008-078		18	11	6	49	14	36	7	44	27	77	9	40	15	5	19
TcCLB.402107.20001		16	13	3								2	1	28	60	10	32	56	74	16		29	35	8	22	18	11	6
TcCLB.425031.20001		16	13	3																16		29	35	8	22	18	11	6	49	78	36	7	44	27	77	9
TcCLB.462815.20001		16	13	3																								6		14		7	26			9		15	5	46	3	38	20		17	21	12	4
TcCLB.461043.20001		16	13	3																				8	22	18	11	6	55	14	50	7	26	84		9		15	5	46	3
TcCLB.480993.20001		16	13	3																					47	18	11	6	49	14	36	7	44	27	77	9	40	15	5	19
TcCLB.465485.20001		16	13	3																							11	6	49	78	36	7	44	27	77	9	40	15	5	19	3	31
TcCLB.437075.20001		16	13	3																									49	14	36	7		27		9	82	15	5	19	3	31	20		17	93	12
TcCLB.399671.20001		16	13	3																											36	7	44		77	9	82	15	5	19	3	31	20		17	93	12	4
TcCLB.504115.110		16	13	3																														27		9		15	5	19	3	31	20		17	93	12	4	48
TcCLB.502015.20001		16	12	4								2	1	28		10	039-060	079-078								18	11	37		14	36	7	044-074			9		15	5
TcCLB.476833.20001		16	12	4																		29		8	68	18	11	37		14	36	7		27		9	82	15	5	019-044		31
TcCLB.509875.165		16	12	4																								37		14	36	7	44	27		9	40	015-099				31	20	62	17	21	12	4
TcCLB.507733.10		16	12	4								2	1	28		10	39	079-078								18	11	37		14	36	7	44			9		15	5
TcCLB.404861.20001		16	12	4																					68	18	11	37		14	36	7	44			9	82	15	5	19	3	31	20
TcCLB.439735.20001		16	12	4								2	1	28	60	10	32	56		16		29	35	8	47	18	11	6	49
TcCLB.450283.20001		16	12	4														86						8	83	18	11	6	49	14	36	7	26			9	82	15	5	19
TcCLB.450565.20001		16	12	4																			35	8	47	18	11	6	49	78	36	7	44	27	77	9	40	15
TcCLB.409625.20001		16	12	4								2	1	28	60	10	32	56		16		29	35	8	47	18	11	6	49
TcCLB.442175.20001		16	12	4																16		29	35	8	47	18	11	6	49	78	36	7	44	27	77	9
TcCLB.467949.20001		16	12	4							67	2	1	28	60	10	32	56	74	16		29	35	8	47	18	11
TcCLB.421361.20001		16	12	4							67	2	1	28	60	10	32	56	74	16		29	35	8	47	18	11
TcCLB.466325.10		16	11	5								2	001-089			10	54			16		29	35	8	68	18	11	37		14	36	7	44
TcCLB.410607.20001		16	11	5									1	28	60	10	32	56	74	16		29	35	8	47	18	11	6	49
TcCLB.478127.20001		16	11	5																								6	55	14	50	7	26	84		9		15	5	46	3	38	20	62	17
TcCLB.471467.20001		16	11	5									1	28	60	10	32	56	74	16		29	35	8	47	18	11	6	49
TcCLB.401661.20001		16	10	6																										14		7	44			9		15	5	19	3	31		62		93	12	4	80
TcCLB.475633.20001		16	10	6																											50	7	26	84		9		15	5	46	3	38	20	62	17	21		4	43
TcCLB.403553.20001		16	9	7																														84		9		15	5	46	3	38	20	62	17	21	34	4	43
TcCLB.472891.20001		16	9	7																														84		9		15	5	46	3	38	20	62	17	21	34	4	43
TcCLB.476967.20001		16	9	7																													26	84		9		15	5	46	3	38	20	62	17	21	34	4	43
TcCLB.402649.20001		16	9	7																													26	84		9		15	5	46	3	38	20	62	17	21	34	4	43
TcCLB.404605.20001		16	9	7																												7	26	84		9		15	5	46	3	38	20	62	17	21	34		43
TcCLB.511597.10		15	15	0																																		15	5	19	3	31	20	61	17	21	12	4	48
TcCLB.420615.20001		15	15	0																																			5	19	3	31	20	61	17	21	12	4	48
TcCLB.503441.5		15	15	0								2	1	28	30	10		23	41	16	70	29	35	8	22	18	11
TcCLB.427991.20001		15	15	0																																9	40	15	5	19	3	31	20	61	17	21	12	4	48
TcCLB.478603.20001		15	15	0																														27	77	9	40	15	5	19	3	31	20	61	17	21	12	4
TcCLB.419897.20001		15	15	0																																		15	5	19	3	31	20	61	17	21	12	4	48
TcCLB.474547.20001		15	14	1														23	41	16	70	29	35	8	22	18	11	6	55	14	50	7
TcCLB.438775.20001		15	14	1									1	28	30	10	72	23	41	16		29	35	8	22	18	11	6
TcCLB.485505.20001		15	14	1										28	30	10		23	41	16		29	35	8	22	18	11	6		14	50
TcCLB.456627.10		15	14	1																				8	22	18	11	6		14	36	7	44	27	77	9	40	15	5
TcCLB.431407.20001		15	14	1								2	1	028-099	30	10		23	41	16	70	29	35	8	22	18	11
TcCLB.506453.100010		15	14	1																																	40	15	5	19	3	31	20	61	17	21	12	4
TcCLB.483159.20001		15	14	1																																		15	5	19	3	89	20		17	21	12	4	48
TcCLB.444221.20001		15	14	1																													44	27	77	9	40	15	5	19	3	31	20	61	17	21	12
TcCLB.435807.20001		15	14	1																												7	44	27	77	9	40	15	5	19	3	31	20	61	17	21
TcCLB.451017.20001		15	14	1																														27		9	40	15	5	19	3	31	20	61	17	21	12	4	43
TcCLB.436749.20001		15	13	2																							11	37		14	36		44	27		9	40	15				31	20		17	21	12	4
TcCLB.422549.20001		15	13	2																				8	22	18	11	6	55	14	50	7	26	84		9		15	5	19
TcCLB.403095.20001		15	13	2																			35	8	22	18	11	6		14		7	26			9		15	5	46	3	38
TcCLB.442957.20001		15	13	2																							11	6	49	14	36	7	44	27	77	9	40	15	5	19	3
TcCLB.439171.20001		15	13	2																16		29	35	8	22	18	11	6		14	50	7	26	84		9		15
TcCLB.485481.20001		15	13	2																			35	8	22	18	11	6	55	14	50	7	26	84		9		15	5
TcCLB.419847.20001		15	13	2																		29	35	8	22		11	6	55	14	50	7	26	84		9		15	5
TcCLB.440327.20001		15	13	2																			35	8	47	18	11	6		14	36	7	44	27	77	9	40	15
TcCLB.500287.20001		15	13	2																			35	8	22	18	11	6	55	14	50	7	26	84		9		15	5
TcCLB.425965.20001		15	13	2																			35	8	22	18	11	6	55	14	50	7	26	84		9		15	5
TcCLB.406819.20001		15	13	2				85	71	081-089	67	2	1	028-099	30	10		23	41	16	70	29	35
TcCLB.428475.20001		15	13	2																											36	7	26			9	82	15	5	19	3	89	20		17	21	12	4
TcCLB.509259.100010		15	13	2																											36	7	44			9	82	15	5	19	3	31	20		17		12	4
TcCLB.418805.20001		15	13	2														23	41	16		29	35	8	22	18	11		55	14	50	7	26	84
TcCLB.508057.100041		15	13	2																											36	7	44			9	82	15	5	19	3	31	20		17		12	4
TcCLB.403887.20001		15	13	2																										14	36	7		27		9	82	15	5	19	3	31	20		17	93	12
TcCLB.409447.20001		15	13	2																												7	26			9		15	5	19	3	38	20	62	17	21	12	4
TcCLB.473241.20001		15	12	3																					68	18	11	37		14	36	7		27		9	82	15	5	19	3	31
TcCLB.110132.40		15	12	3												013-010-014				016-019-072				8	22			6		14		7	26			009-035				19	3		20		17		12	4
TcCLB.483449.20001		15	12	3																		29	35	008-078		18	11	6	49	14	36	7	44	27	77	9	40
TcCLB.410709.20001		15	12	3																				8	22	18	11	6	55	14	50	7	26	84		9		15	5	46
TcCLB.435019.20001		15	12	3																			35	8	22	18	11	6	49	78	36	7	44	27	77	9	40
TcCLB.467241.20001		15	12	3																							11	6	49	14	36	7	26			9	82	15	5	19	3	89	20
TcCLB.471799.20001		15	12	3																				8	83	18	11	6	49	14	36	7	26			9	82	15	5	19
TcCLB.411607.20001		15	12	3								2	1	28	60	10	32	56		16		29		8	22	18	11	6	49
TcCLB.484309.20001		15	12	3					081-071	081-028-089	67	2	1	028-099	30	10		23	41	16	70	29	35	8
TcCLB.400027.20001		15	12	3																									49	14	36	7	044-074			9		15	5	19	3	31	20		17	93	12
TcCLB.409139.9		15	12	3																														27	77	9	82	15	5	19	3	31	20		17	93	12	004-066
TcCLB.506183.15		15	12	3																									075-049	14	36		44	27		9	40	15				31	20	62	17	21	12	4
TcCLB.506393.100080		15	12	3																														27		9		15	5	19	3	31	20		17	93	12	4
TcCLB.477625.20001		15	12	3								2	1	28	60	10	32	56	74	16		29	35	8	22	18	11
TcCLB.508831.220		15	12	3																														27		9		15	5	19	3	31	20			93	12	4	48
TcCLB.413651.20001		15	11	4																				8	68	18	11	37		14	36	7	44	27		9	82	15	5	19
TcCLB.412731.20001		15	11	4														96		16	90	29	35	8	68	18	11	37		14	36	7		27								31
TcCLB.416221.20001		15	11	4												10	32	88		16	90	29	35	8	68	18	11	37		14	36	7
TcCLB.485429.20001		15	11	4																		29	35	8	68	18	11	37		14	36	7	44			9	82	15	5
TcCLB.402545.20001		15	11	4													32	88		16	90	29	35	8	68	18	11	37		14	36	7		27
TcCLB.476941.20001		15	11	4								2	1	28	60	10	32	56	74	16		29	35	008-078		18	11	6
TcCLB.509387.19		15	11	4								2	1	028-095		10	42	86						8	83	18	11	6		14	36	7	26
TcCLB.418917.20001		15	11	4									1	28	60	10	32	56	74	16		29	35	8	47	18	11	6
TcCLB.509941.100085		15	11	4																					47	18		6						27		9				19	3	38	20	62	17	21	12	4
TcCLB.487653.20001		15	11	4									1	28	60	10	32	56	74	16		29	35	8	47	18	11	6
TcCLB.404975.30		15	11	4																																	82	15	5	19	3	31	20		17	93	12	4
TcCLB.508159.13		15	11	4								2	1	28	60	10	32	56	74	16		29	35	8	47	18	11
TcCLB.509345.20		15	11	4								2	1	28	87	10	32	88		16	90	29	35	8	68	18	11
TcCLB.505089.20001		15	11	4						81	67	2	1	28	60	10	32	56	74	16		29	35	8	47
TcCLB.435381.20001		15	11	4							67	2	1	28	87	10	32	88		16	90	29	35	8	68		11
TcCLB.450707.20001		15	10	5						081-062	67	2	1	28	60	10	32	56	74	16		29	35	8	47
TcCLB.486739.20001		15	10	5																																		15	5	19	3	31	20		17	93	12	4	80
TcCLB.406475.20001		15	10	5																													26	84		9		15	5	46	3	38	20	62	17		12	4
TcCLB.498175.20001		15	10	5																														84		9		15	5	46	3	38	20	62	17	21	12	4
TcCLB.444233.20001		15	9	6										28	87	10	54	96		16	90	29	35	8	68	18	11	37		14
TcCLB.416233.20001		15	9	6													32	56	74	16		29		8	47	18	11	6	49	78	36	7	44
TcCLB.408481.20001		15	9	6																														84		9		15	5	46	3	38	20	62	17	21	34	4
TcCLB.429185.20		15	9	6																													44			9		15	5	19	3	31	20			93	12	4	80
TcCLB.420573.20001		15	9	6																														84		9		15	5	46	3	38	20	62	17	21	34	4
TcCLB.424725.20001		15	9	6																													26	84		9		15	5	46	3	38	20	62	17	21	34	4	43
TcCLB.511183.620		15	9	6																																				19	3	31	20		17	93	12	4	80
TcCLB.508007.10		15	8	7																																		15	5	46	3	38	20	62	17	21	34	4	43
TcCLB.508111.10		14	14	0									1	28	30	10		23	41	16		29	35	8		18	11	6	55
TcCLB.450469.20001		14	14	0											30			23	41	16	70	29	35	8	22	18	11	6	55	14
TcCLB.420985.20001		14	14	0												10		23	41	16		29	35	8	22	18	11	6	55	14		7
TcCLB.507499.90		14	14	0								2	1	28	30	10		23	41	16		29	35	8	22	18	11
TcCLB.506689.10		14	14	0								2	1	28	30	10		23	41	16		29	35	8	22	18	11
TcCLB.420413.20001		14	14	0																																						31	20	61	17	21	12	4	48
TcCLB.507171.20001		14	14	0								2	1	28	30	10		23	41	16		29	35	8	22	18	11
TcCLB.470497.20001		14	14	0																																						31	20	61	17	21	12	4	48
TcCLB.484361.20001		14	14	0								2	1	28	30	10		23	41	16		29	35	8	22	18	11
TcCLB.422467.20001		14	14	0																																		15	5	19	3	31	20	61	17	21	12	4	48
TcCLB.460067.20001		14	13	1											30	10	72	23	41	16	70	29	35	8	22	18	11	6
TcCLB.510933.140		14	13	1											30	10	72	23	41	16	70	29	35	8	22	18	11	6
TcCLB.455555.20001		14	13	1														23	41	16	70	29	35	8	22	18	11	6	55	14	50
TcCLB.431285.20001		14	13	1														23	41	16		29	35	8	22	18	11	6	55	14	50	7
TcCLB.508633.10		14	13	1											30	10	72		41	16	70	29	35	8	22	18	11	6	55
TcCLB.500705.20001		14	13	1														23	41	16	70	29	35	8	22	18	11	6	55	14	50
TcCLB.430567.20001		14	13	1								2	1	028-099	30	10		23	41	16	70	29	35	8	22	18
TcCLB.426609.20001		14	13	1																											36	7	44	27	77	9	40	15	5	19	3	31	20	61
TcCLB.412997.20001		14	13	1																											36	7		27		9		15	5	19	3	31	20		17	93	12	4
TcCLB.433021.20001		14	13	1								2	1	28	30	10	72	23	41	16		29	35	8	22	18
TcCLB.447233.20001		14	13	1																											36	7	44	27		9	40	15	5			31	20		17	21	12	4
TcCLB.460611.20001		14	13	1																													44	27	77	9	40	15	5	19	3	31	20	61	17	21
TcCLB.413893.10		14	13	1																																		15	5	19	3	31	20	61	17	21	12	4	48
TcCLB.421373.20001		14	13	1							67	2	1	28	30	10	72	23	41	16	70	29	35	8
TcCLB.462693.20001		14	12	2																							11	37		14	36	7		27		9	82	15	5	19	3	31	20
TcCLB.411773.20001		14	12	2																				8	68	18	11	37		14	36	7		27		9		15	5	19	3
TcCLB.462689.20001		14	12	2																			35	8	68	18	11	37		14	36	7		27		9		15	5	19
TcCLB.451425.20001		14	12	2																	70	29	35	8	22		11	6	55	14	50	7	26	84		9
TcCLB.435745.20001		14	12	2															41	16		29	35	8	22	18	11	6		14	50	7	26	84
TcCLB.499327.20001		14	12	2																		29	35	8	22	18	11	6	55	14	50	7	26	84		9
TcCLB.413297.20001		14	12	2																										14	36	7	044-074			9		15	5	19	3	31	20		17	93	12
TcCLB.475967.20001		14	12	2																												7	26			9	82	15	5	19	3	89	20		17	21	12	4
TcCLB.504261.30		14	12	2											30	10	72	23		16	70	29	35	8	22	18			55		50	7
TcCLB.430217.20001		14	12	2																												7	26			9	82	15	5	19	3	89	20		17	21	12	4
TcCLB.425495.20001		14	12	2																												7	26			9	82	15	5	19	3	89	20		17	21	12	4
TcCLB.453793.20001		14	12	2																						18	11		49	14	36	7	44	27	77	9	40	15	5	19
TcCLB.508255.100010		14	11	3								2	1	028-089		10	32			16		29		8	68	18	11	37		14	36
TcCLB.508835.30		14	11	3								2	1	028-089		10	32			16		29		8	68	18	11	37		14	36
TcCLB.423557.20001		14	11	3																								37		14	36	7	44			9	82	15	5	19	3	31	20		17
TcCLB.444669.20001		14	11	3									1	28	60	10	32	56		16		29	35	8	47	18	11	6
TcCLB.449343.20001		14	11	3																					22		11	6	55	14	50	7	26	84		9		15	5	46	3
TcCLB.398697.20001		14	11	3											87								35	8	22	18	11	6	55	14	50	7	26	84		9
TcCLB.404661.20001		14	11	3										28	60	10	32	56		16		29	35	8	47	18	11	6		14
TcCLB.423377.20001		14	11	3									1	28	60	10	32	56		16		29	35	8	47	18	11	6
TcCLB.475497.20001		14	11	3																						18	11	6	49	78	36	7	44	27		9	40	15	5	19
TcCLB.479271.20001		14	11	3																						18	11	6	55	14		7	26	84		9		15	5	46	3	38
TcCLB.439861.20001		14	11	3																			35	8	47	18	11	6		78	36	7	44	27	77	9	40
TcCLB.505347.20001		14	11	3																														27	77	9	82	15	5	19	3	31	20		17	93	12	004-066-066-066-066-066
TcCLB.466495.20001		14	11	3																									55	14	50	7	26			9		15	5	19	3	38	20	62	17
TcCLB.508069.5		14	11	3								2	1	28	60	10	32	56		16		29	35	8	47	18	11
TcCLB.451015.20001		14	11	3								2	1	28	60	10	32	56		16		29	35	8	47	18	11
TcCLB.511843.30		14	11	3																														27		9		15	5	19	3	31	20			93	12	4
TcCLB.504769.140		14	11	3																																		15	5	19	3	31	20		17	93	12	4	48
TcCLB.511549.20		14	10	4								2	1	28		10	39	079-078								18	11	37		14	36		44					15	5
TcCLB.486865.20001		14	10	4																					68	18	11	37		14	36	7	44		77	9	82	15	5	19
TcCLB.469531.20001		14	10	4																16		29	35	8	47	18	11	6	49	78	36	7	44	27
TcCLB.440379.20001		14	10	4												10	32	56		16		29	35	8	47	18	11	6	49	78	36
TcCLB.417809.20001		14	10	4										28	60	10	32	56	74	16		29	35	8	47	18	11	6
TcCLB.448675.20001		14	10	4												10	32	56	74	16		29	35	8	47	18	11	6	49	14
TcCLB.511777.10		14	10	4								2	1		60	10	32	56	74	16		29		8	47	18	11	6
TcCLB.400873.20001		14	10	4						081-089	67	2	1	28	87	10	32	88		16	90	29	35	8
TcCLB.502297.20001		14	10	4																												7	26	84		9		15	5	46	3	38	20		17	21	34	4
TcCLB.414673.20001		14	10	4																																9		15	5	46	3	38	20	62	17	21	12	4
TcCLB.494891.20001		14	10	4																										14	50	7	26	84		9		15	5	46	3	38	20		17	21
TcCLB.479633.20001		14	10	4																														84		9		15	5	46	3	38	20	62	17	21	12	4
TcCLB.507445.30		14	10	4								2	1	28	87	10	32	88		16	90	29	35	8	68	18
TcCLB.473207.20001		14	10	4																													26	84		9		15	5	46	3	38	20	62	17	21	12	4
TcCLB.403735.20001		14	10	4																																9		15	5	19	3	31	20		17		12	4	80
TcCLB.423609.20001		14	10	4																																9		15	5	46	3	38	20	62	17	21	12	4
TcCLB.431321.20001		14	10	4																																9		15	5	46	3	38	20	62	17	21	12	4
TcCLB.511765.10		14	10	4																													26	84		9		15	5	46	3	38	20	62	17	21		4
TcCLB.431639.20001		14	10	4							67	2	1	28	60	10	32	56	74	16		29	35	8						78
TcCLB.462925.20001		14	9	5							007-089-067	2	001-089			10	54			16		29	35	8	68	18	11	37		14
TcCLB.474655.20001		14	9	5										28	87	10	32	88		16	90	29	35	8	68	18	11	37
TcCLB.415925.20001		14	9	5																														084-001				15	5	46	3	38	20	62	17	21	12	4
TcCLB.423211.20001		14	9	5								2	1		87	10	54	96		16	90	29	35	8	68	18	11
TcCLB.467985.20001		14	9	5																													26	84		9		15	5	46	3	38	20	62	17	21	34	4
TcCLB.511767.100010		14	9	5																														84		9		15	5	46	3	38	20	62	17	21		4
TcCLB.400945.10		14	9	5								2	1		87	10	54	96		16	90	29	35	8	68	18	11
TcCLB.423799.20001		14	9	5																														84		9		15	5	46	3	38	20	62	17	21	12	4
TcCLB.503621.20001		14	9	5								2	1		87	10	54	96		16	90	29	35	8	68	18	11
TcCLB.421951.20001		14	9	5								2	1		87	10	54	96		16	90	29	35	8	68	18	11
TcCLB.427059.20001		14	9	5								2	1		87	10	54	96		16	90	29	35	8	68	18	11
TcCLB.450929.20001		14	8	6																														84		9		15	5	46	3	38	20	62	17	21	34	4	43
TcCLB.480545.20001		14	8	6																																		15	5	46	3	38	20	62	17	21	34	4	43
TcCLB.426675.9		14	8	6																																		15	5	46	3	38	20	62	17	21	34	4	43
TcCLB.511173.10		13	13	0																																					3	31	20	61	17	21	12	4	48
TcCLB.453023.20001		13	13	0																														27	77	9	40	15	5	19	3	31	20	61	17	21
TcCLB.399699.20001		13	13	0								2	1	28	30	10		23	41	16		29	35	8	22	18
TcCLB.420955.20001		13	13	0																																	40	15	5	19	3	31	20	61	17	21	12	4	48
TcCLB.509737.9		13	13	0								2	1	28	30	10		23	41	16	70	29	35	8	22
TcCLB.455393.20001		13	13	0																																		15	5	19	3	31	20	61	17	21	12	4	48
TcCLB.427585.20001		13	13	0								2	1	28	30	10		23	41	16		29	35	8	22	18
TcCLB.407315.20001		13	13	0									1	28	30	10		23	41	16		29	35	8	22	18	11
TcCLB.412797.20001		13	13	0																																				19	3	31	20	61	17	21	12	4	48
TcCLB.465123.20001		13	13	0																																		15	5	19	3	31	20	61	17	21	12	4	48
TcCLB.506231.10		13	13	0																													26			9		15	5	19	3	31	20		17	21	12	4
TcCLB.421499.20001		13	13	0																																		15	5	19	3	31	20	61	17	21	12	4	48
TcCLB.451127.20001		13	13	0																																		15	5	19	3	31	20	61	17	21	12	4	48
TcCLB.450225.20001		13	12	1											30	10		23	41	016-060		29	35	8	22	18	11	6	55
TcCLB.402305.20001		13	12	1														23	41	16		29	35		22	18		6	55		50	7	26			9
TcCLB.511841.10		13	12	1											30	10	72	23	41	16	70	29	35	8	22		11	6
TcCLB.451799.20001		13	12	1																																					3	31	20	61	17	21	12	4	48
TcCLB.506899.10		13	12	1																																					3	31	20	61	17	21	12	004-018
TcCLB.402163.20001		13	12	1									1	028-099	30	10		23	41	16	70	29	35	8	22	18
TcCLB.510013.50		13	12	1																												7	26			9	40	15	5	19	3		20		17	21	12	004-016
TcCLB.421987.20001		13	12	1								2	1	028-099	30	10		23	41	16	70	29	35	8	22
TcCLB.474441.20001		13	12	1								2	1	028-099	30	10		23	41	16	70	29	35	8	22
TcCLB.435659.20001		13	12	1							062-067	2	1	28	30	10		23	41	16		29	35	8	22
TcCLB.432987.20001		13	12	1																																					3	89	20		17	21	12	4	48
TcCLB.469583.20001		13	12	1																												7		27		9		15	5	19	3	31	20		17	93	12	4
TcCLB.451207.20001		13	12	1																													26			9		15	5	19	3	38	20		17	21	12	4
TcCLB.442427.10		13	12	1											30	10	72	23	41	16	70	29	35	8	22	18	11
TcCLB.417127.20001		13	12	1																										14	36	7						15	5	19	3	31	20		17	93	12	4
TcCLB.415483.20001		13	12	1						81		2	1	28	30	10	72	23	41	16		29	35	8
TcCLB.473399.20001		13	11	2																							11	37		14	36	7	044-074			9		15	5	19	3	31	20
TcCLB.406301.20001		13	11	2																								37		14	36	7	044-074			9		15	5	19	3	31	20		17
TcCLB.510191.31		13	11	2											30	10	72	23	41	16	70	29	35	8	022-077			6	55
TcCLB.410183.20001		13	11	2															016-041	16	70	29	35	8	22		11	6	55	14	50	7
TcCLB.443225.20001		13	11	2																					22	18	11	6	55	14	50	7	26	84		9		15	5
TcCLB.472633.20001		13	11	2								2	1	028-099	30	10	072-016		41	16	70	29	35	8	22
TcCLB.443899.20001		13	11	2																																					3	89	20		17	21	12	4	48
TcCLB.510929.100010		13	11	2																																				19	3	89	20		17	21	12	4	048-064
TcCLB.461901.20001		13	11	2																																9	82	15	5	19	3	89	20		17	21	12	4	48
TcCLB.484399.20001		13	11	2																											36	7	44			9		15	5	19	3	31	20		17	93	12
TcCLB.507875.100040		13	11	2								2		28	30																								5		3	38	20	62	17	21	12	4
TcCLB.497803.20001		13	10	3														079-078								18	11	37		14	36	7	044-074			9		15	5	19	3
TcCLB.480153.20001		13	10	3																16	90	29	35	8	68	18	11	37		14	36	7		27
TcCLB.399155.20001		13	10	3																						078-018	11	6	49	14	36	7	44			9		15	5	19	3
TcCLB.479083.20001		13	10	3																							11	6	55	14	50	7	26	84		9		15	5	46	3
TcCLB.480693.20001		13	10	3										28	60	10	32	56		16		29	35	8	47	18	11	6
TcCLB.411231.20001		13	10	3														56		16		29	35	8	47	18	11	6		78	36	7					40
TcCLB.424095.20001		13	10	3																					22	18	11	6		14	50	7	26	84		9		15	5	46
TcCLB.436341.20001		13	10	3																																					3	89	20		17	21	12	4	48
TcCLB.433733.10		13	10	3																																	40	15	5	46	3	38	20		17	21	12	4
TcCLB.430045.20001		13	10	3										28	60	10	32	56	74	16		29	35	8	22	18	11
TcCLB.422683.20001		13	10	3																																		15	5	19	3	31	20		17	93	12	4	48
TcCLB.416229.20001		13	9	4								2	1	28		10	039-060	079-078								18	11	37		14	36	7	044-074
TcCLB.507995.10		13	9	4								2	1			10	39	079-078								18	11	37		14	36	7	44			9
TcCLB.421473.20001		13	9	4												10	32	88		16	90	29	35	8	68	18	11	37		14
TcCLB.408223.20001		13	9	4											60	10	32	56	74	16		29	35	8	47	18	11	6
TcCLB.471997.20001		13	9	4												10	32	56	74	16		29	35	8	47	18	11	6	49
TcCLB.484111.20001		13	9	4																16		29		8	47	18	11	6	49	78	36	7	44	27
TcCLB.479561.20001		13	9	4																		29	35	8	47	18	11	6	49	78	36	7	44	27
TcCLB.498393.20001		13	9	4												10	32	56	74	16		29	35	8	47	18	11	6	49
TcCLB.454733.20001		13	9	4									1		60	10	32	56	74	16		29		8	47	18	11	6
TcCLB.439923.20001		13	9	4							028-036-003-089-067	2	1	28	60	10	32	56		16		29	35	8	47
TcCLB.445347.20001		13	9	4																																		15	5	46	3	38	20	62	17	21	12	4	48
TcCLB.467373.20001		13	9	4																																			5	19	3	31	20		17	93	12	4	48
TcCLB.466367.20001		13	9	4								2	1	28	60	10	32	56	74	16		29	35	8	47
TcCLB.438199.20001		13	9	4																																9		15	5	46	3	38	20	62	17		12	4
TcCLB.510115.70		13	9	4																																		15	5	46	3	38	20	62	17	21	12	4	43
TcCLB.401305.20001		13	9	4																																9		15	5	46	3	38	20		17	21	34	4	43
TcCLB.482637.20001		13	9	4																																		15	5	19	3	31	20		17	93	12	4	80
TcCLB.413293.9		13	9	4								2	1	28	60	10	32	56	74	16		29	35	8	47
TcCLB.462243.20001		13	8	5												10	54	96		16	90	29	35	8	68	18	11	37		14
TcCLB.399685.20001		13	8	5												10	42	86						8	83	18	11	6	49	14	36	7	44
TcCLB.508605.31		13	8	5																										014-017				27		9	82		5	19	003-044							4	48
TcCLB.456107.20001		13	8	5																																		15	5	46	3	38	20	62	17	21	34	4
TcCLB.411385.20001		13	8	5																																		15	5	46	3	38	20	62	17	21	34	4
TcCLB.486621.20001		13	8	5																																					3	31	20		17	93	12	4	80
TcCLB.474761.20001		13	8	5								089-002	1	28	87	10	32	88		16	90	29	35	8	68
TcCLB.406027.20001		13	7	6		071-053	45	85	71	081-089	67	2	1	028-029		10	039-029	79												78
TcCLB.459061.10		13	7	6																																			5	46	3	38	20	62	17	21	34	4	43
TcCLB.507731.60		13	7	6																																						31	20		17	93	12	4	80
TcCLB.475289.20001		13	7	6																																9		15	5	46	3	38	20	62	17	21	34		43
TcCLB.403969.20001		12	12	0											30	10		23	41	16		29	35	8	22	18	11	6
TcCLB.465721.20001		12	12	0										28	30	10		23	41	16		29	35	8	22		11	6
TcCLB.509179.231		12	12	0										28	30	10		23	41	16		29	35	8	22		11	6
TcCLB.454577.20001		12	12	0																							11	6	55	14		7	26			9		15	5		3	31	20
TcCLB.456589.20001		12	12	0								2	1	28	30	10		23	41	16		29	35	8	22
TcCLB.417067.20001		12	12	0								2	1	28	30	10		23	41	16		29	35	8	22
TcCLB.427749.20001		12	12	0									1	28	30	10		23	41	16		29	35	8	22	18
TcCLB.409907.20001		12	12	0																												7	26			9	40	15	5	19	3		20		17	21	12
TcCLB.449419.20001		12	12	0																														27	77	9	40	15	5	19	3	31	20	61	17
TcCLB.453975.20001		12	12	0										28	30	10		23	41	16		29	35	8	22	18	11
TcCLB.403453.20001		12	12	0																																						31	20	61	17	21	12	4	48
TcCLB.475309.20001		12	12	0								2	1	28	30	10		23	41	16		29	35	8	22
TcCLB.402703.20001		12	12	0									1	28	30	10		23	41	16		29	35	8	22	18
TcCLB.480419.20001		12	12	0																																					3	31	20	61	17	21	12	4	48
TcCLB.508297.7		12	11	1												013-010				16		29	35	8	22	18		6		14		7	26			9
TcCLB.466659.20001		12	11	1								2	1	028-099	30	10		23	41	16	70	29	35	8
TcCLB.468045.20001		12	11	1								2	1	028-099	30	10		23	41	16	70	29	35	8
TcCLB.426487.20001		12	11	1	66	53	45			081-089	67	2	1	28	30	10		23	41
TcCLB.415203.20001		12	11	1							089-067	2	1	28	30	10		23	41	16		29	35	8
TcCLB.480041.20001		12	11	1		53	45			081-062	67	2	1	28	30	10		23	41	16
TcCLB.494845.20001		12	11	1											30	10	72	23	41	16	70	29	35	8	22	18
TcCLB.455363.20001		12	11	1											30	10	72	23	41	16	70	29	35	8	22	18
TcCLB.511779.10		12	11	1																																			5	19	3	31	20	61	17	21	12	4
TcCLB.508113.7		12	11	1											30	10	72	23	41	16	70	29	35	8	22	18
TcCLB.429173.20001		12	11	1																16		29	35		22	18			55		50	7	26			9		15	5
TcCLB.452233.20001		12	11	1											30	10	72	23	41	16	70	29	35	8	22	18
TcCLB.506653.10		12	11	1																																				19	3	31	20	61	17	21	12	4	48
TcCLB.412437.20001		12	11	1								2	1	28	30	10		23	41	16		29	35	8	47
TcCLB.480951.20001		12	11	1																																		15	5	19	3	89	20		17	21	12	4	48
TcCLB.450653.20001		12	11	1																																				19	3	31	20	61	17	21	12	4	48
TcCLB.447847.10		12	11	1																													26			9		15	5		3		20	62	17	21	12	4
TcCLB.481207.20001		12	10	2																						18	11	37		14	36	7	044-074			9		15	5	19	3
TcCLB.445789.20001		12	10	2																				8	22	18	11	6	55	14	50	7	26	84		9
TcCLB.443651.20001		12	10	2		53	45			081-062	67	2	1	028-099	30	10		23	41	16
TcCLB.476911.20001		12	10	2																																		15	5	19	3	31	20		17	93	12	4	48
TcCLB.503659.30		12	10	2																																				19	3	31	20	61	17	21	12	4
TcCLB.472773.20001		12	10	2																													44			9		15	5	19	3	31	20		17	93	12	4
TcCLB.468689.20001		12	10	2																																9		15	5	19	3	31	20		17	93	12	4	80
TcCLB.498609.20001		12	10	2																																	82	15	5	19	3	89	20		17	21	12	4	48
TcCLB.431943.20001		12	10	2																														27		9	82	15	5	19	3	31	20		17	93	12
TcCLB.433141.20001		12	10	2																											36	7				9		15	5	19	3	31	20	62	17	93
TcCLB.448627.20001		12	9	3								2	1	28		10	039-060	079-078								18	11	37		14	36	7
TcCLB.458207.20001		12	9	3									001-089			10	32			16		29		8	68	18	11	37		14	36
TcCLB.434731.20001		12	9	3								2	001-089			10	32			16		29		8	68	18	11	37		14
TcCLB.429925.20001		12	9	3																16		29	35	8	68	18	11	37		14	36	7	44
TcCLB.485517.20001		12	9	3																				8	68	18	11	37		14	36	7		27		9	82	15
TcCLB.444053.20001		12	9	3																16		29	35	8	68	18	11	37		14	36	7	44
TcCLB.433555.20001		12	9	3																16	90	29	35	8	68	18	11	37		14	36	7
TcCLB.458437.20001		12	9	3																				8	83	18	11	6	49	14	36	7	26			9	82
TcCLB.451903.20001		12	9	3																		29		8	22	18	11	6	49	78	36	7	44	27
TcCLB.451837.20001		12	9	3												10	32	56	74	16		29	35	8	47	18	11	6
TcCLB.398745.20001		12	9	3														86						8	83	18	11	6	49	14	36	7	26			9
TcCLB.418703.20001		12	9	3			45	85	071-001	081-089	67	2	1	028-099	30	10		23	41
TcCLB.416325.20001		12	9	3																																		15	5	46	3		20	62	17	21	12	4
TcCLB.450977.20001		12	9	3								2	1		60	10	32	56		16		29	35	8	47	18
TcCLB.449261.20001		12	9	3									1	28	60	10	32	56	74	16		29	35	8	22
TcCLB.503957.10		12	9	3																																		15	5	46	3	38	20	62	17	21	12	4
TcCLB.450795.20001		12	9	3																																		15	5	46	3	38	20	62	17	21	12	4
TcCLB.451669.20001		12	9	3																									49	78	36	7	44	27	77		40	15	5	19	3
TcCLB.442771.20001		12	9	3																																9		15	5	46	3	38	20		17	21	12	4
TcCLB.504775.20001		12	9	3							67	2	1	28	87	10	32	88		16	90	29	35
TcCLB.433233.20001		12	9	3							67	2	1		87	10	32	88		16	90	29	35	8
TcCLB.403845.20001		12	9	3							67	2	1	28	87	10	32	88		16	90	29	35
TcCLB.477339.20001		12	9	3							67	2	1	28	60	10	32	56	74	16		29	35
TcCLB.492747.20001		12	9	3							67	2	1	28	60	10	32	56	74	16		29		8
TcCLB.496079.20001		12	8	4											016-060			079-078								18	11	37		14	36	7	044-074			9		15	5
TcCLB.473647.20001		12	8	4											60			079-078								18	11	37		14	36	7	044-074			9		15	5
TcCLB.453837.20001		12	8	4											60			079-078								18	11	37		14	36	7	044-060			9		15	5
TcCLB.484255.20001		12	8	4							089-067	2	001-089			10	54			16		29	35	8	68	18	11
TcCLB.436903.20001		12	8	4							089-067	2	1	028-089		10	32	88		16	90	29	35	8
TcCLB.424045.20001		12	8	4							002-067	2	1	028-089		10	32	88		16	90	29	35	8
TcCLB.412593.20001		12	8	4							089-067	2	001-089			10	54			16		29	35	8	68	18	11
TcCLB.414807.20001		12	8	4							089-067	2	1	028-089		10	32	88		16	90	29	35	8
TcCLB.460809.20001		12	8	4																																		015-036		19	3	31	20		17	93	12	4	48
TcCLB.436779.20001		12	8	4														56	74	16		29	35	8	47	18	11		49	14	36
TcCLB.467975.20001		12	8	4																																		15	5	46	3	38	20	62	17	21	12	4
TcCLB.443305.20001		12	8	4																																				19	3	31	20		17	93	12	4	48
TcCLB.498485.20001		12	8	4							67	2	1		87	10	54	96		16	90	29	35	8
TcCLB.410339.20001		12	7	5									1	028-062		10	039-029-060	079-078								18	11	37		14	36	7	044-060
TcCLB.433871.20001		12	7	5												10	54	96		16	90	29	35	8	68	18	11	37
TcCLB.410271.20001		12	7	5													32	56	74	16		29		8	47	18	11	6	49	78
TcCLB.403481.20001		12	7	5																																						31	20		17	93	12	4	80
TcCLB.429687.20001		12	7	5																													44			009-005		15	5		3	31	20			93	12	4	80
TcCLB.507267.20001		12	7	5																																						31	20		17	93	12	4	80
TcCLB.499481.20001		12	7	5																																		15	5	46	3	38	20	62	17	21		4	43
TcCLB.417669.20001		12	7	5																																		15	5		3	31	20	62		93	12	4	80
TcCLB.462083.20001		12	6	6																																			5	46	3	38	20	62	17	21	34	4	43
TcCLB.505147.20001		12	6	6																																			5	46	3	38	20		17		34	4	43
TcCLB.405991.20001		12	6	6																																					3	38	20	62	17	21	34	4	43
TcCLB.438217.20001		12	6	6																																			5	46	3	38	20	62	17	21	34	4	43
TcCLB.454877.20001		12	6	6																																						31	20		17	93	12	4	48
TcCLB.451027.20001		12	5	7																																			020-005	46	3	38	20	62	17	21	34	4	43
TcCLB.483781.20001		11	11	0														23	41	16	70	29	35	8	22	18	11	6
TcCLB.466587.20001		11	11	0												10		23	41	16		29	35	8	22	18	11	6
TcCLB.419955.20001		11	11	0																		29	35	8	22	18		6		14		7	26			9		15
TcCLB.451301.20001		11	11	0															41	16		29	35	8	22	18	11	6	55	14
TcCLB.450701.20001		11	11	0														23	41	16	70	29	35	8	22	18	11	6
TcCLB.410803.20001		11	11	0											30	10		23	41	16		29	35	8	22		11	6
TcCLB.433645.20001		11	11	0																																						31	20	61	17	21	12	4	48
TcCLB.398819.20001		11	11	0								2	1	28	30	10		23	41	16		29	35	8
TcCLB.423707.10		11	11	0								2	1	28	30	10		23	41	16		29	35	8
TcCLB.434547.20001		11	11	0								2	1	28	30	10		23	41	16		29	35	8
TcCLB.461157.20001		11	11	0																																		15	5					61	17	21	12		48
TcCLB.471585.20001		11	11	0								2	1	28	30	10		23	41	16		29	35	8
TcCLB.507907.10		11	11	0																																							20		17	21	12	4	48
TcCLB.478175.20001		11	11	0								2	1	28	30	10		23	41	16		29	35	8
TcCLB.436499.20001		11	11	0								2		28	30	10		23	41	16		29	35	8	22
TcCLB.413359.20001		11	11	0									1	28	30	10		23	41	16		29	35	8	22
TcCLB.451969.20001		11	11	0								2	1	28	30	10		23	41	16		29	35	8
TcCLB.434965.20001		11	11	0																																							20		17	21	12	4	48
TcCLB.402069.20001		11	11	0							67	2	1	28	30	10		23	41	16		29	35
TcCLB.402557.20001		11	10	1														23	41	016-060		29	35	8	22	18	11	6	55
TcCLB.408211.20001		11	10	1																		29	35	8	22	18	11	6		14	50	7	26
TcCLB.510441.41		11	10	1																					47	18	11	6		14			26				40			19		31			17
TcCLB.451355.20001		11	10	1																	70	29	35	8	22		11	6	55	14	50	7
TcCLB.445931.20001		11	10	1																				8	22	18	11	6	55	14		7	26	84		9
TcCLB.511089.5		11	10	1																	70	29	35	8	22		11	6	55	14	50	7
TcCLB.413899.20001		11	10	1										028-099	30	10		23	41	16	70	29	35	8	22
TcCLB.494927.20001		11	10	1			45			081-089	67	2	1	28	30	10		23	41	16
TcCLB.405011.20001		11	10	1							089-067	2	1	28	30	10		23	41	16		29	35
TcCLB.466965.20001		11	10	1							062-067	2	1	28	30	10		23		16		29	35	8
TcCLB.406787.20001		11	10	1						081-089	67	2	1	28	30	10		23	41	16		29
TcCLB.402119.20001		11	10	1	66	53	45			081-089	67	2	1	28	30	10		23
TcCLB.509315.20		11	10	1								2	1	28	30	10	72	23	41	16	70	29
TcCLB.421405.20001		11	10	1																																9	82	15	5	19		31	20		17		12	4
TcCLB.458877.20001		11	10	1								2	1	28	30	10	72	23	41	16	70	29
TcCLB.505669.20001		11	10	1																																					3	31	20	61	17	21	12	4	48
TcCLB.451835.20001		11	10	1																																				19	3	31	20	61	17	21	12	4
TcCLB.409845.20001		11	10	1																																			5	19	3	89	20		17	21	12	4	48
TcCLB.416535.20001		11	10	1											30	10	72	23	41	16	70	29	35	8	22
TcCLB.473131.20001		11	10	1																																					3	31	20	61	17	21	12	4	48
TcCLB.507471.41		11	10	1																																	82	15	5	19	3	31	20		17		12	4
TcCLB.456463.20001		11	10	1																										78	36	7		27	77	9	40	15	5	19	3
TcCLB.495127.20001		11	10	1																																		15	5	19	3	31	20		17	93	12	4	48
TcCLB.432153.20001		11	9	2																							11	37		14	36	7	44			9		15	5	19	3
TcCLB.415245.20001		11	9	2																						18	11	37		14	36	7	44	27		9	40	15
TcCLB.469715.20001		11	9	2																								6		78	36	7	44	27	77	9	40	15	5
TcCLB.400895.20001		11	9	2												10	32	56		16		29	35	8	47	18	11	6
TcCLB.417875.20001		11	9	2									028-001	28	30	10		23	041-087				35	8	22	18	11
TcCLB.469329.20001		11	9	2																																		15	5	19	3	31	20		17	93	12	4	048-040
TcCLB.436197.20001		11	9	2																																		15	5	19	3	31	20		17	93	12	4	048-001
TcCLB.474697.20001		11	9	2																																			5	19	3	31	20		17	93	12	4	48
TcCLB.405603.20001		11	9	2																																					3	89	20		17	21	12	4	48
TcCLB.480721.20001		11	9	2	66	53	45			081-089	67	2	1	28	30	10	72
TcCLB.452701.20001		11	9	2																									49	14	36	7	44			9		15	5	19	3	31
TcCLB.443575.20001		11	9	2								2	1	28	60	10	32	56		16		29	35	8
TcCLB.408679.20001		11	9	2																													44			9	82	15	5	19	3	31	20		17		12
TcCLB.422707.20001		11	8	3												089-010	32			16		29		8	68	18	11	37		14	36
TcCLB.507899.5		11	8	3								2	1			10	39	079-078								18	11	6	49	14		7
TcCLB.438381.20001		11	8	3		53	45	85	71	081-089	67	2	1	028-095		10																											020-010
TcCLB.511597.50		11	8	3								2	1	28	60	10	32	56	74	16		29	35
TcCLB.510055.10		11	8	3																																		15	5	46	3	38	20		17	21	12	4
TcCLB.508309.5		11	8	3								2	1	28	60	10	32	56	74	16		29	35
TcCLB.466417.20001		11	8	3								2	1	28	87	10	32	88		16	90	29	35
TcCLB.451227.20001		11	8	3								2	1	28	60	10	32	56	74	16		29	35
TcCLB.507835.80		11	8	3																																		15	5	46	3	38	20	62	17	21	12	4
TcCLB.411817.20001		11	8	3																																		15	5	46	3	38	20	62	17	21	12	4
TcCLB.509271.10		11	8	3																																				19	3	38	20	62	17	21	12	4
TcCLB.511595.59		11	8	3								2	1	28	60	10	32	56	74	16		29	35
TcCLB.510843.19		11	8	3								2	1	28	87	10	32	88		16	90	29	35
TcCLB.498401.20001		11	8	3								2	1	28	87	10	32	88		16	90	29	35
TcCLB.450695.20001		11	8	3																																9		15	5	46	3	38	20	62	17	21		4
TcCLB.440251.20001		11	8	3							67	2	1	28	60	10	32	56	74	16		29
TcCLB.428719.20001		11	8	3							67	2	1		87	10	32	88		16	90	29	35
TcCLB.485525.20001		11	7	4													39	079-078								18	11	6	49	14	36		044-014					15	5
TcCLB.430111.20001		11	7	4								2	1	028-095		10	42	86						8	83	18	11	6
TcCLB.468281.20001		11	7	4								2	1	028-095		10	42	86						8	83	18	11	6
TcCLB.464847.20001		11	7	4																				8	47	18	11	6	49	78	36	7	44	27
TcCLB.483329.20001		11	7	4							028-018-089-067	2	1	28	60	10	32	56	74	16		29
TcCLB.404933.20001		11	7	4			45	85	071-001	081-089	67	2	1	028-099	30	10	72
TcCLB.506625.35		11	7	4																														27		9	82	15	5	19	003-050-090
TcCLB.408729.20001		11	7	4																																			5		3	31	20		17	93	12	4	80
TcCLB.483205.20001		11	7	4																																				19	3	31	20		17	93	12	4	80
TcCLB.473435.20001		11	7	4																																			5	46	3	38	20	62	17	21	12	4
TcCLB.416285.20001		11	7	4								2	1		60	10	32	56	74	16		29		8						78
TcCLB.485421.20001		11	7	4																																				19	3	31	20		17	93	12	4	80
TcCLB.475951.20001		11	7	4																												7	26	84		9		15	5	46	3	38	20	62
TcCLB.451895.20001		11	6	5													54	96		16	90	29	35	8	68	18	11	37
TcCLB.412639.20001		11	6	5														56	74	16		029-081		8	22	18	11	6	49	78
TcCLB.483053.20001		11	6	5																																				19	3	38	20	62	17	21	34	4	43
TcCLB.457539.20001		11	6	5																																					3	38	20		17	21	34	4	43
TcCLB.470257.20001		11	5	6																																						38	20	62	17	21	34	4	43
TcCLB.417985.20001		11	5	6																																							20		17	93	12	4	48
TcCLB.422063.20001		11	5	6																																						38	20	62	17	21	34	4	43
TcCLB.439639.20001		11	5	6																																						38	20	62	17	21	34	4	43
TcCLB.472339.20001		11	5	6																																			5	46	3	38	20	62	17	21	34		43
TcCLB.410385.20001		10	10	0								2	1			10				16		29	35	8	22	18		6
TcCLB.454801.20001		10	10	0																			35		22			6	55	14		7	26			9		15	5
TcCLB.410721.20001		10	10	0																																				19	3	31	20	61	17	21	12	4	48
TcCLB.504193.15		10	10	0								2	1	28	30	10		23	41	16		29	35
TcCLB.505551.20001		10	10	0																																							20	61	17	21	12	4	48
TcCLB.460011.20001		10	10	0								2	1	28	30	10		23	41	16		29	35
TcCLB.510501.40		10	10	0																																								61	17	21	12	4	48
TcCLB.469391.20001		10	10	0																																					3	31	20	61	17	21	12	4	48
TcCLB.406963.20001		10	10	0																																							20	61	17	21	12	4	48
TcCLB.511479.10		10	10	0								2	1	28	30	10		23	41	16		29	35
TcCLB.483237.20001		10	10	0																																							20	61	17	21	12	4	48
TcCLB.486321.20001		10	10	0								2	1	28	30	10		23	41	16		29	35
TcCLB.447275.20001		10	10	0											30	10		23	41	16	70	29	35	8	22
TcCLB.506159.5		10	10	0								2	1	28	30	10		23	41	16	70	29
TcCLB.480661.20001		10	10	0																																					3	31	20	61	17	21	12	4	48
TcCLB.422487.20001		10	10	0																																					3	31	20	61	17	21	12	4	48
TcCLB.401051.20001		10	10	0						81	67	2	1	28	30	10		23	41	16
TcCLB.406995.20001		10	10	0																												7	26			9		15	5		3	31	20				12	4
TcCLB.473519.20001		10	10	0							67	2	1	28	30	10		23	41	16		29
TcCLB.452763.20001		10	10	0			45	85	71		67	2	1	28	30	10		23
TcCLB.407635.20001		10	9	1								2	1	28	30	10		23	41	016-060		29	35
TcCLB.416207.20001		10	9	1								2	1	028-099	30	10		23	41	16	70	29
TcCLB.509531.10		10	9	1								2	1	028-099	30	10		23	41	16	70	29
TcCLB.509085.136		10	9	1										28	030-062			23	41	16		29	35		22	18	11
TcCLB.445453.20001		10	9	1							67	2	1	28	30	10		23	41	016-060		29
TcCLB.511665.20001		10	9	1	66	53	45	85	71	081-089	67	2	1	28
TcCLB.411891.20001		10	9	1							67	2	1	028-099	30	10		23	41	16	70
TcCLB.503495.20001		10	9	1	66	53	45	85	71	081-089	67	2	1	28
TcCLB.431431.20001		10	9	1																																				19	3	89	20		17	21	12	4	48
TcCLB.415451.20001		10	9	1											30	10	72	23	41	16	70	29	35	8
TcCLB.510833.10		10	9	1																																					3	31	20	61	17	21	12	4	48
TcCLB.471869.20001		10	9	1																																					3	89	20		17	21	12	4	48
TcCLB.505085.20001		10	9	1																																					3	31	20	61	17	21	12	4
TcCLB.399177.20001		10	9	1																																						31	20	61	17	21	12	4	48
TcCLB.462073.20001		10	9	1													72		41	16	70	29	35	8	22	18	11
TcCLB.474437.20001		10	9	1																																						31	20	61	17	21	12	4	48
TcCLB.438291.20001		10	9	1																																		15	5	19	3	31	20		17	93	12	4
TcCLB.406725.20001		10	9	1	66	53	45			81	67	2	1	28	60	10
TcCLB.398315.20001		10	8	2														079-078								18	11	37		14	36	7						15	5	19
TcCLB.402093.20001		10	8	2																						18	11	37		14	36		44	27		9	40	15
TcCLB.410245.20001		10	8	2																							11	37		14	36	7	44	27		9	40	15
TcCLB.479811.20001		10	8	2														037-029-079-078								18	11	6	49	14	36	7						15	5
TcCLB.401233.20001		10	8	2																				8	83	18	11	6	49	14	36	7	26
TcCLB.493951.20001		10	8	2		53	45	085-081	71	081-089	67	2	1	28	30
TcCLB.506283.20		10	8	2								2	1	028-089		10	32			16		29		8	68	18
TcCLB.498219.20001		10	8	2																																							20	62	17	21	12	4	48
TcCLB.452375.20001		10	8	2	66	53	45			081-028	67	2	1	28	60	10
TcCLB.509419.131		10	8	2								2	1	28	60	10	32	56		16		29	35
TcCLB.510207.50		10	8	2								2	1	28	60	10	32	56		16		29	35
TcCLB.462487.20001		10	8	2																																				19	3	38	20	62	17	21	12	4
TcCLB.439787.20001		10	8	2								2	1	28	60	10	32	56		16		29	35
TcCLB.510211.100010		10	8	2								2	1	28	60	10	32	56		16		29	35
TcCLB.410275.18		10	8	2								2	1	28	60	10	32	56		16		29	35
TcCLB.510107.15		10	8	2								2	1	28	60	10	32	56		16		29	35
TcCLB.429185.31		10	7	3								2	1	28			039-018	079-078								18	11	37		14	36
TcCLB.465031.20001		10	7	3																						078-018	11	37		14	36	7	44			9		15	5
TcCLB.418079.20001		10	7	3																		29		008-078		18	11	37		14	36	7	44			9
TcCLB.424733.20001		10	7	3														079-078								18	11	37		14	36	7	44			9		15
TcCLB.413115.20001		10	7	3												10	39					029-079-078				18	11	6	49	14	36	7
TcCLB.511929.40		10	7	3								002-089				10	54			16		29	35	8	68	18	11
TcCLB.506355.35		10	7	3								2	001-089			10		56		16			35	8	68	18	11
TcCLB.413173.20001		10	7	3																														27		9	82	015-036		19	3	31	20		17	93
TcCLB.448067.20001		10	7	3																																009-005		15	5		3	31	20			93	12	4	80
TcCLB.424707.20001		10	7	3								2	1	28	87	10	32	88		16	90	29
TcCLB.450621.20001		10	7	3								2	1	28	60	10	32	56	74	16		29
TcCLB.507981.51		10	7	3								2	1	28	87	10	32	88			90	29	35
TcCLB.474947.20001		10	7	3								2	1	28	87	10	32	88		16	90	29
TcCLB.458195.20001		10	7	3									1	28	60	10	32	56	74	16		29	35
TcCLB.494667.20001		10	7	3										28		10	32	56	74	16		29	35	8						78
TcCLB.511087.19		10	7	3								2	1	28	60	10	32	56	74	16		29
TcCLB.477759.20001		10	7	3								2	1	28	60	10	32	56	74	16		29
TcCLB.452217.20001		10	7	3																										14	50	7	26	84		9		15	5	46	3
TcCLB.444293.20001		10	7	3							67	2	1	28	60	10	32	56	74	16
TcCLB.471561.20001		10	7	3							67	2	1	28	87	10	32	88		16	90
TcCLB.510971.30		10	7	3							67	2	1		87	10	32	88		16	90	29
TcCLB.509915.10		10	7	3							67	2	1		87	10	32	88		16	90	29
TcCLB.409233.20001		10	7	3							67	2	1	28	87	10	32	88		16	90
TcCLB.477945.20001		10	7	3							67	2	1	28	87	10	32	88		16	90
TcCLB.417673.20001		10	7	3							67	2	1		87	10	32	88		16	90	29
TcCLB.448109.20001		10	7	3							67	2	1	28	60	10	32	56	74	16
TcCLB.420509.20001		10	6	4											60			079-078								18	11	37		14	36	7	44			9
TcCLB.409955.20001		10	6	4							089-067	2	1	28	60	10	32	56	74	16
TcCLB.452997.20001		10	6	4							089-067	2	1	28	60	10	32	56	74	16
TcCLB.511077.7		10	6	4								2	1		87	10	54	96		16	90	29	35
TcCLB.504189.5		10	6	4								2	1		87	10	54	96		16	90	29	35
TcCLB.425655.20001		10	6	4																																						31	20	62	17	21	34	4	43
TcCLB.508449.31		10	6	4																																					3	38	20	62	17	21	34	4
TcCLB.399369.20001		10	5	5							062-067	2	1		87	10	54	96		16	90	29
TcCLB.403415.20001		10	5	5																																						31	20		17	93	12	4	80
TcCLB.463003.20001		10	5	5																																					3	31	20	62		93	12	4	80
TcCLB.443567.20001		10	5	5																																					3	38	20	62	17	21	34	4	43
TcCLB.504639.60		10	5	5																																											12	4	48
TcCLB.410395.20001		10	5	5																																						38	20	62	17	21	34	4	43
TcCLB.455205.20001		10	4	6																																										93	12	4	48
TcCLB.457113.20001		10	4	6																																											12	4	80
TcCLB.415387.20001		10	2	8																																										93	12	4	80
TcCLB.506895.80		9	9	0																16		29	35	8	22	18	11	6		14
TcCLB.444653.20001		9	9	0								2	1	28	30	10		23	41	16		29
TcCLB.415417.20001		9	9	0																																											12	4	48
TcCLB.464525.20001		9	9	0																																								61	17	21	12	4	48
TcCLB.403849.20001		9	9	0								2	1	28	30	10		23	41	16		29
TcCLB.510489.50		9	9	0																																											12	4	48
TcCLB.444023.20001		9	9	0																																									17	21	12	4	48
TcCLB.468057.20001		9	9	0																																											12	4	48
TcCLB.401257.20001		9	9	0								2	1	28	30	10		23	41	16		29
TcCLB.506347.5		9	9	0								2	1	28	30	10		23	41	16	70
TcCLB.409119.20001		9	9	0																																								61	17	21	12	4	48
TcCLB.435889.20001		9	9	0								2	1	28	30	10		23	41	16		29
TcCLB.446163.20001		9	9	0																																				19	3	31	20		17	21	12	4
TcCLB.508857.15		9	9	0								2	1	28	30	10		23	41	16		29
TcCLB.450577.20001		9	9	0																																		15	5	19	3		20		17	21	12	4
TcCLB.483515.20001		9	9	0								2	1	28	30	10		23	41	16		29
TcCLB.460483.20001		9	9	0								2	1	28	30	10		23	41	16		29
TcCLB.468957.20001		9	9	0																																9		15	5	19	3	31	20		17	21
TcCLB.505155.4		9	9	0								2	1	28	30	10		23	41	16	70
TcCLB.511765.55		9	9	0								2		28	30	10		23	41	16		29	35
TcCLB.474393.20001		9	9	0							67	2	1	28	30	10		23	41	16
TcCLB.507881.110		9	8	1																	026-070						11	6		14							40			19		31			17
TcCLB.451113.20001		9	8	1																16		29	35	8	47	18	11	6		14
TcCLB.404763.20001		9	8	1																16			35		22	18	11	6	55	14	50
TcCLB.409213.20001		9	8	1							013-089-067	2	1	28	30	10		23	41	16
TcCLB.403583.20001		9	8	1																																							20		17	21	12	4	48
TcCLB.443117.20001		9	8	1																																		15	5	19	3		20		17	21	12	004-016
TcCLB.507995.20		9	8	1																																										21	12	4	48
TcCLB.437327.20001		9	8	1								2	1	028-099	30	10		23	41	16	70
TcCLB.487471.20001		9	8	1								2	1		030-062			23	41	16		29	35				11
TcCLB.453005.20001		9	8	1																																				019-044		31	20	61	17	21	12	4	48
TcCLB.452699.5		9	8	1								2	1	28	030-062			23	41	16		29	35
TcCLB.411315.20001		9	8	1									028-001	28	30	10		23	41	16		29	35
TcCLB.477105.20001		9	8	1	66	53			71		67	2	1	28	30																													062-023
TcCLB.482677.20001		9	8	1							67	2	1	28	030-062			23	41	16		29
TcCLB.468509.20001		9	8	1	66	53	45	85	071-062		67	2	1	28
TcCLB.425713.20001		9	8	1	66		45	85	71	081-089	67	2	1	28
TcCLB.475301.20001		9	8	1		53	45			081-062	67	2	1	28	30	10
TcCLB.416907.20001		9	8	1																												7	44	27	77	9	40	15	5
TcCLB.447789.20001		9	8	1											30	10	72	23	41	16	70	29	35
TcCLB.403167.20001		9	8	1																																						31	20	61	17	21	12	4
TcCLB.479441.20001		9	8	1																																						31	20	61	17	21	12	4	48
TcCLB.452785.20001		9	8	1											30	10	72	23	41	16	70	29	35
TcCLB.399313.20001		9	8	1								2	1	28	30	10	72	23	41	16
[truncated: 1,184 more rows]
[truncated: 7 more columns]

## Sheet: Confidence Heat Map
MODEL				66	53	45	85	71	81	67	2	1	28	30	10	32	23	41	16	70	29	35	8	22	18	11	6	55	14	36	7	26	27	77	9	40	15	5	19	3	31	20	61	17	21	12	4	48	73
MODEL											0.0588889	0.154444	0.454444	0.435556	0.345556	0.587778	0.683333	0.595556	0.35	0.558889	0.531111	0.284444	0.216667	0.38	0.255556	0.22	0.211111	0.364444	0.362222	0.143333	0.267778	0.331111	0.401111	0.306667	0.287778	0.485556	0.184444	0.114444	0.223333	0.103333	0.373333	0.341111	0.611111	0.4	0.355556	0.337778	0.12	0.47	0.47
TcCLB.510197.130	43	38	5	0	0	0	0	0	0	0	394.615	268.312	94.1793	141.858	253.931	234.248	182.719	137.19	181.869	0	148.162	141.858	257.74	170.101	162.676	236.099	280.005	109.586	207.951	141.858	216.901	110.304	204.406	84.7883	259.652	170.933	217.802	157.788	198.252	432.607	69.4752	128.769	151.348	73.8361	185.279	313.005	305.903	186.134	266.379
TcCLB.510197.180	43	38	5	0	0	0	0	0	0	0	394.615	278.045	94.1793	141.858	263.489	234.248	182.719	137.19	181.869	0	148.162	141.858	257.74	170.101	162.676	236.099	280.005	109.586	207.951	141.858	216.901	110.304	204.406	84.7883	259.652	170.933	217.802	157.788	198.252	432.607	69.4752	128.769	151.348	73.8361	185.279	377.143	305.903	191.297	266.379
TcCLB.510201.10	43	38	5	0	0	0	0	0	0	0	394.615	349.319	115.378	89.4427	285.913	207.063	141.076	133.34	222.331	0	148.162	141.858	306.914	166.788	162.676	272.191	282.954	97.6121	168.442	139.517	268.312	119.048	204.406	84.7883	246.371	170.933	217.802	157.788	157.788	432.607	110.304	142.641	151.348	63.4009	185.279	313.005	305.903	191.297	266.379
TcCLB.511183.400	43	38	5	0	0	0	0	0	0	0	368.506	364.213	164.317	170.933	285.913	223.24	178.48	180.171	222.331	0	152.95	180.171	239.818	175.952	191.297	272.191	256.786	85.4481	167.614	149.752	248.254	113.194	131.81	86.1097	250.142	186.991	217.802	206.176	206.176	432.607	98.3036	161.041	184.424	49.0521	110.304	243.555	326.338	122.757	266.379
TcCLB.506613.40	43	37	6	0	0	0	0	0	0	0	394.615	243.555	157.788	172.601	233.324	207.063	176.793	215.101	222.331	0	152.148	209.731	306.914	171.766	178.48	272.191	280.005	119.787	155.363	134.876	254.882	116.109	197.378	97.6121	246.371	215.101	217.802	196.506	187.85	432.607	183.571	131.048	149.752	36.9815	178.48	344.051	242.619	101.086	49.0521
TcCLB.508163.250	43	37	6	0	0	0	0	0	0	0	384.754	263.489	51.2647	159.412	209.731	250.142	213.306	217.802	253.931	0	142.641	144.999	325.306	373.896	152.148	272.191	282.954	119.048	158.599	170.933	206.176	116.109	195.634	41.0507	285.913	216.901	217.802	204.406	213.306	425.819	110.304	144.211	119.787	63.4009	122.012	161.041	298.856	146.577	91.4627
TcCLB.510191.100040	43	37	6	0	0	0	0	0	0	0	386.938	336.719	164.317	144.211	212.41	260.61	149.752	184.424	181.869	0	127.257	203.523	251.087	170.933	166.788	205.291	280.005	148.162	204.406	61.0236	258.696	134.876	217.802	98.9967	307.927	192.161	167.614	206.176	173.437	345.102	81.5149	113.194	42.6128	45.7947	164.317	350.376	330.477	96.9223	266.379
TcCLB.510279.110	43	37	6	0	0	0	0	0	0	0	394.615	330.477	81.5149	122.012	199.128	203.523	101.086	0	193.028	28.3612	148.162	79.5715	200.882	182.719	162.676	236.099	280.005	82.8191	151.348	125	229.64	130.287	181.869	80.8653	279.024	170.933	217.802	225.975	198.252	397.92	109.586	127.257	144.999	42.0899	144.999	291.863	247.312	131.048	266.379
TcCLB.510361.80	43	37	6	0	0	0	0	0	0	0	336.719	310.97	137.964	74.4663	207.063	216	140.296	0	161.041	34.0239	96.2341	55.7865	253.931	158.599	210.623	209.731	274.138	143.425	134.107	128.012	295.852	134.876	219.61	41.5692	295.852	119.787	168.442	217.802	172.601	432.607	87.4378	92.8177	109.586	184.424	217.802	193.028	277.066	194.764	197.378
TcCLB.508107.30	43	36	7	0	0	0	0	0	0	0	386.938	336.719	164.317	144.211	282.954	260.61	149.752	184.424	181.869	0	127.257	203.523	251.087	303.884	166.788	272.191	280.005	148.162	204.406	141.858	227.805	134.876	217.802	78.2847	307.927	192.161	167.614	206.176	173.437	328.406	81.5149	113.194	42.6128	45.7947	164.317	350.376	330.477	96.9223	266.379
TcCLB.508293.60	43	36	7	0	0	0	0	0	0	0	394.615	273.164	78.2847	96.9223	245.431	292.859	178.48	154.557	174.274	0	127.257	172.601	251.087	277.066	145.787	272.191	237.956	117.576	186.991	125	254.882	116.109	190.433	98.9967	252.034	176.793	217.802	237.027	206.176	432.607	151.348	113.194	146.577	76.3675	149.752	236.099	330.477	101.086	193.895
TcCLB.510693.120	43	36	7	0	0	0	0	0	0	0	391.319	281.97	88.7727	148.162	165.963	146.577	195.634	196.506	133.34	31.1496	88.1044	0	283.939	141.076	148.162	272.191	271.22	156.17	114.648	133.34	266.379	134.876	204.406	54.6442	297.853	184.424	217.802	237.027	157.788	432.607	78.9272	147.369	54.6442	82.8191	190.433	221.422	318.111	32.5762	277.066
TcCLB.511149.180	43	36	7	0	0	0	0	0	0	0	323.245	347.209	82.8191	119.787	257.74	181.019	114.648	194.764	144.211	0	161.858	175.112	286.902	328.406	174.274	221.422	280.005	147.369	125.751	108.869	258.696	96.9223	217.802	100.388	303.884	166.788	215.101	237.027	202.642	341.951	156.17	110.304	76.3675	109.586	190.433	272.191	292.859	186.134	210.623
TcCLB.510137.10	42	38	4	0	0	0	0	0	0	0	394.615	319.136	106.727	90.1144	154.557	158.599	115.378	0	101.785	0	88.1044	101.086	236.099	109.586	122.012	251.087	280.005	122.757	186.134	133.34	258.696	103.189	237.027	148.957	332.554	204.406	190.433	217.802	227.805	341.951	126.503	113.92	80.2176	186.991	160.226	186.991	230.559	98.3036	82.1661
TcCLB.504115.60	42	37	5	0	0	0	0	0	0	0	394.615	334.634	108.869	80.2176	215.101	180.171	91.4627	0	195.634	0	101.086	221.422	263.489	160.226	225.062	179.325	280.005	146.577	176.793	186.991	244.492	134.876	164.317	46.3324	299.859	205.291	180.171	208.84	176.793	343	207.951	90.7877	124.251	194.764	156.17	198.252	208.84	297.853	124.251
TcCLB.506133.190	42	37	5	0	0	0	0	0	0	0	302.876	304.893	146.577	60.434	203.523	193.895	150.55	0	195.634	0	114.648	59.8463	302.876	116.841	210.623	272.191	304.893	156.17	169.271	104.599	225.062	130.287	183.571	54.6442	295.852	125.751	217.802	217.802	206.176	432.607	224.15	136.417	51.2647	71.9564	134.876	217.802	308.94	258.696	146.577
TcCLB.506279.10	42	37	5	0	0	0	0	0	0	0	327.371	322.216	101.785	125.751	215.101	205.291	50.7085	0	215.101	0	117.576	101.785	266.379	56.9367	225.062	221.422	282.954	125.751	130.287	149.752	268.312	108.153	197.378	113.92	325.306	185.279	217.802	237.027	170.933	377.143	115.378	110.304	76.3675	114.648	122.012	198.252	265.415	189.571	116.841
TcCLB.506279.60	42	37	5	0	0	0	0	0	0	0	263.489	310.97	116.841	119.048	207.063	243.555	59.2605	0	215.101	0	117.576	101.785	249.197	56.9367	225.062	221.422	282.954	125.751	154.557	149.752	268.312	108.153	175.112	46.3324	307.927	181.869	215.101	237.027	208.84	432.607	157.788	110.304	122.012	63.4009	208.84	203.523	275.113	168.442	148.957
TcCLB.506409.170	42	37	5	0	0	0	0	0	0	0	373.896	353.553	118.311	84.1302	195.634	283.939	98.9967	0	140.296	0	76.3675	49.0521	262.528	169.271	157.788	272.191	225.975	141.858	171.766	143.425	286.902	113.194	217.802	46.3324	262.528	214.203	217.802	237.027	208.84	349.319	152.148	111.746	71.9564	122.757	208.84	276.089	322.216	207.951	132.575
TcCLB.506939.200	42	37	5	0	0	0	0	0	0	0	394.615	330.477	59.8463	67.6335	175.112	153.753	103.894	0	172.601	0	94.1793	54.6442	186.134	148.957	110.304	272.191	242.619	141.858	219.61	115.378	246.371	134.876	230.559	109.586	322.216	278.045	180.171	225.975	153.753	432.607	138.74	134.107	102.486	45.2591	139.517	213.306	277.066	186.991	141.076
TcCLB.507059.50	42	37	5	0	0	0	0	0	0	0	367.431	363.142	98.9967	79.5715	216	211.516	112.469	0	193.028	0	104.599	50.7085	241.684	135.646	210.623	171.766	280.005	146.577	222.331	124.251	286.902	103.894	200.882	134.876	263.489	192.161	215.101	225.975	202.642	432.607	120.527	146.577	151.348	94.1793	217.802	263.489	297.853	152.95	64
TcCLB.507071.230	42	37	5	0	0	0	0	0	0	0	367.431	289.875	164.317	108.153	207.063	160.226	71.3334	0	155.363	0	135.646	223.24	263.489	125.751	191.297	221.422	253.931	148.162	185.279	144.211	268.312	125.751	219.61	134.876	301.869	204.406	180.171	237.027	170.933	450.885	183.571	154.557	77.0048	146.577	150.55	172.601	232.401	212.41	223.24
TcCLB.508109.60	42	37	5	0	0	0	0	0	0	0	324.275	395.716	120.527	46.3324	205.291	175.952	124.251	0	136.417	0	115.378	121.269	181.019	186.991	202.642	272.191	280.005	131.81	204.406	141.858	274.138	116.841	190.433	78.2847	252.982	225.975	186.134	237.027	187.85	377.143	86.1097	95.5475	133.34	184.424	166.788	200.882	259.652	249.197	187.85
TcCLB.508761.40	42	37	5	0	0	0	0	0	0	0	301.869	353.553	98.3036	35.4924	195.634	283.939	61.6151	0	165.139	0	84.1302	58.6767	224.15	51.2647	225.062	221.422	280.005	143.425	174.274	137.19	268.312	113.194	158.599	148.957	297.853	185.279	215.101	237.027	230.559	450.885	113.92	112.469	66.4149	122.757	176.793	277.066	275.113	207.063	168.442
TcCLB.509525.100	42	37	5	0	0	0	0	0	0	0	267.345	331.515	108.869	36.9815	138.74	280.987	52.3832	0	171.766	0	86.7729	34.0239	280.005	169.271	210.623	272.191	280.005	100.388	116.841	143.425	268.312	130.287	213.306	46.3324	280.987	214.203	217.802	237.027	208.84	432.607	152.148	116.841	71.9564	122.757	208.84	230.559	293.855	207.951	216
TcCLB.510419.20	42	37	5	0	0	0	0	0	0	0	391.319	261.568	99.6914	155.363	285.913	275.113	193.895	164.317	174.274	0	127.257	203.523	251.087	172.601	210.623	272.191	290.869	0	165.963	145.787	164.317	119.048	243.555	84.7883	285.913	186.991	216.901	237.027	133.34	432.607	98.3036	168.442	78.2847	49.0521	142.641	265.415	308.94	207.063	161.041
TcCLB.510715.20	42	37	5	0	0	0	0	0	0	0	391.319	343	133.34	97.6121	207.063	181.019	126.503	0	246.371	0	108.153	99.6914	271.22	44.1942	144.211	221.422	251.087	175.952	171.766	124.251	281.97	130.287	205.291	134.876	307.927	166.788	217.802	237.027	172.601	432.607	151.348	146.577	116.109	117.576	169.271	210.623	308.94	324.275	151.348
TcCLB.511451.80	42	37	5	0	0	0	0	0	0	0	391.319	332.554	164.317	106.016	179.325	145.787	121.269	0	217.802	0	112.469	55.7865	281.97	131.81	161.858	272.191	282.954	163.496	184.424	121.269	281.97	130.287	219.61	134.876	295.852	150.55	217.802	237.027	170.933	370.659	148.162	111.746	105.307	126.503	175.112	200.882	257.74	60.434	77.6439
TcCLB.503609.50	42	36	6	0	0	0	0	0	0	0	314.024	168.442	105.307	49.6022	188.71	255.834	53.5097	0	166.788	0	138.74	175.112	288.883	315.044	174.274	221.422	280.005	130.287	163.496	141.858	219.61	84.7883	185.279	111.746	313.005	236.099	215.101	237.027	202.642	374.977	126.503	94.8626	49.6022	64	190.433	272.191	292.859	186.134	210.623
TcCLB.506909.160	42	36	6	0	0	0	0	0	0	0	394.615	350.376	73.8361	67.6335	170.933	161.858	47.414	0	114.648	0	113.194	89.4427	328.406	46.3324	225.062	221.422	280.005	158.599	148.957	140.296	268.312	125.751	176.793	41.5692	322.216	161.858	217.802	217.802	230.559	341.951	98.9967	110.304	69.4752	122.757	144.999	204.406	265.415	200.882	231.479
TcCLB.506939.120	42	36	6	0	0	0	0	0	0	0	391.319	280.005	82.1661	187.85	247.312	260.61	175.952	132.575	222.331	0	150.55	131.048	243.555	178.48	210.623	251.087	280.005	0	175.112	113.194	246.371	134.876	233.324	134.876	325.306	119.787	143.425	208.84	196.506	450.885	91.4627	141.858	165.139	44.7256	144.999	245.431	302.876	37.4824	301.869
TcCLB.506973.120	42	36	6	0	0	0	0	0	33.0564	196.506	327.371	310.97	161.041	141.858	228.722	177.636	117.576	139.517	174.274	0	116.109	121.269	288.883	141.076	191.297	209.731	282.954	33.539	129.527	79.5715	232.401	134.876	185.279	96.9223	332.554	181.869	142.641	237.027	206.176	432.607	78.2847	129.527	103.189	184.424	176.793	334.634	293.855	240.75	0
TcCLB.506993.1000160	42	36	6	0	0	0	0	0	0	0	203.523	300.864	109.586	119.048	203.523	225.062	58.6767	0	132.575	0	110.304	126.503	315.044	213.306	202.642	221.422	280.005	187.85	172.601	104.599	254.882	108.869	162.676	54.6442	277.066	189.571	215.101	237.027	208.84	432.607	214.203	90.1144	48.504	177.636	190.433	281.97	300.864	192.161	162.676
TcCLB.507059.20	42	36	6	0	0	0	0	0	0	0	368.506	294.853	127.257	179.325	183.571	141.076	139.517	219.61	193.895	0	161.041	153.753	306.914	255.834	202.642	236.099	280.005	179.325	163.496	147.369	281.97	130.287	216	92.1394	313.005	215.101	186.134	193.895	202.642	397.92	100.388	150.55	130.287	59.2605	183.571	242.619	292.859	180.171	0
TcCLB.507069.160	42	36	6	0	0	0	0	0	0	0	368.506	275.113	98.9967	119.787	245.431	207.951	137.19	84.7883	176.793	0	125.751	81.5149	252.982	141.858	150.55	175.952	282.954	150.55	193.028	102.486	281.97	134.876	112.469	0	279.024	118.311	168.442	225.975	187.85	397.92	211.516	170.101	152.95	127.257	208.84	306.914	300.864	102.486	134.107
TcCLB.507091.1000100	42	36	6	0	0	0	0	0	0	0	394.615	364.213	106.016	119.048	193.895	197.378	126.503	0	161.041	0	113.92	123.503	235.173	297.853	193.028	221.422	181.869	140.296	222.331	156.978	291.863	116.841	160.226	134.876	249.197	162.676	215.101	217.802	182.719	432.607	119.048	134.107	125.751	152.95	217.802	308.94	330.477	140.296	91.4627
TcCLB.507091.1000160	42	36	6	0	0	0	0	0	0	0	340.902	343	157.788	101.086	231.479	192.161	98.9967	0	191.297	0	98.3036	116.841	235.173	297.853	200.004	236.099	181.869	140.296	200.004	139.517	295.852	116.841	163.496	98.9967	249.197	141.076	178.48	237.027	202.642	432.607	110.304	131.048	122.012	186.991	190.433	250.142	292.859	240.75	102.486
TcCLB.507091.60	42	36	6	0	0	0	0	0	0	0	394.615	330.477	99.6914	111.024	216	192.161	88.7727	0	178.48	0	138.74	102.486	263.489	328.406	210.623	236.099	280.005	126.503	222.331	158.599	284.926	116.841	174.274	134.876	197.378	148.162	215.101	208.84	202.642	432.607	148.957	165.963	167.614	130.287	217.802	263.489	330.477	111.024	91.4627
TcCLB.507163.70	42	36	6	0	0	0	0	0	0	0	394.615	370.659	124.251	113.194	186.991	199.128	111.024	0	131.048	0	140.296	98.3036	236.099	361.004	225.062	171.766	234.248	158.599	171.766	166.788	251.087	103.894	200.882	96.2341	293.855	170.933	217.802	116.841	181.019	397.92	136.417	120.527	114.648	87.4378	196.506	203.523	322.216	161.041	56.3607
TcCLB.507747.130	42	36	6	0	0	0	0	0	0	0	336.719	239.818	112.469	77.0048	190.433	234.248	93.4977	0	213.306	0	127.257	61.0236	315.044	44.1942	183.571	221.422	277.066	127.257	165.139	128.769	192.161	130.287	197.378	41.5692	249.197	182.719	217.802	237.027	202.642	432.607	152.148	110.304	65.8084	52.3832	160.226	229.64	261.568	170.933	165.963
TcCLB.508013.40	42	36	6	0	0	0	0	0	0	0	362.073	364.213	152.148	128.769	184.424	217.802	107.439	0	195.634	0	156.17	50.7085	186.134	132.575	33.0564	272.191	280.005	152.95	171.766	143.425	234.248	130.287	184.424	41.0507	270.249	165.139	217.802	237.027	143.425	432.607	141.076	148.957	120.527	42.6128	148.162	215.101	343	30.2105	368.506
TcCLB.508375.20	42	36	6	0	0	0	0	0	0	0	394.615	330.477	99.6914	111.024	216	192.161	103.894	0	178.48	0	113.92	105.307	263.489	328.406	193.028	236.099	280.005	126.503	222.331	155.363	284.926	116.841	174.274	134.876	240.75	161.858	215.101	208.84	156.978	432.607	148.957	165.963	167.614	130.287	217.802	263.489	292.859	120.527	141.858
TcCLB.508761.200	42	36	6	0	0	0	0	0	0	0	394.615	336.719	116.841	119.048	207.063	270.249	51.823	0	148.162	0	117.576	101.785	295.852	231.479	225.062	180.171	280.005	143.425	154.557	154.557	252.982	125.751	246.371	113.92	307.927	191.297	217.802	237.027	208.84	432.607	31.1496	110.304	42.0899	177.636	190.433	277.066	229.64	207.063	197.378
TcCLB.508977.120	42	36	6	0	0	0	0	0	0	0	346.155	343	106.016	139.517	231.479	137.964	119.787	0	191.297	0	99.6914	84.7883	272.191	297.853	210.623	221.422	280.005	165.963	222.331	158.599	295.852	116.841	197.378	134.876	216.901	224.15	215.101	153.753	183.571	432.607	110.304	131.048	158.599	132.575	217.802	263.489	330.477	180.171	91.4627
TcCLB.508977.40	42	36	6	0	0	0	0	0	0	0	394.615	336.719	106.016	100.388	174.274	185.279	132.575	0	151.348	0	95.5475	78.9272	263.489	328.406	210.623	166.788	280.005	134.107	222.331	132.575	280.005	116.841	163.496	134.876	202.642	220.516	182.719	217.802	206.176	432.607	113.92	150.55	151.348	98.3036	190.433	263.489	330.477	177.636	152.95
TcCLB.508977.80	42	36	6	0	0	0	0	0	0	0	394.615	305.903	157.788	108.153	216	185.279	126.503	0	178.48	0	102.486	131.048	272.191	272.191	193.028	203.523	253.931	153.753	222.331	169.271	281.97	116.841	193.895	113.194	216.901	229.64	144.211	190.433	186.134	432.607	96.9223	137.19	151.348	99.6914	157.788	308.94	292.859	156.17	82.8191
TcCLB.508983.20	42	36	6	0	0	0	0	0	0	0	338.809	332.554	70.0928	122.757	62.2085	225.062	58.6767	0	163.496	0	141.858	126.503	233.324	231.479	191.297	221.422	280.005	83.4738	174.274	169.271	258.696	113.194	252.982	41.5692	303.884	264.451	217.802	217.802	208.84	432.607	113.92	110.304	108.869	62.8038	190.433	253.931	286.902	207.951	127.257
TcCLB.509419.70	42	36	6	0	0	0	0	0	0	0	337.763	350.376	121.269	146.577	272.191	230.559	113.92	175.952	217.802	0	113.92	133.34	274.138	194.764	210.623	272.191	282.954	109.586	133.34	151.348	246.371	130.287	178.48	31.6228	282.954	275.113	182.719	225.975	227.805	359.936	144.211	121.269	49.0521	39.5082	149.752	228.722	343	0	380.399
TcCLB.509897.70	42	36	6	0	0	0	0	0	0	0	362.073	363.142	108.869	82.8191	216	201.761	113.92	0	193.028	0	130.287	94.8626	241.684	304.893	210.623	184.424	280.005	126.503	222.331	166.788	286.902	116.841	153.753	116.109	317.088	152.148	180.171	225.975	155.363	432.607	128.769	150.55	75.0983	70.0928	217.802	233.324	268.312	115.378	232.401
TcCLB.510279.230	42	36	6	0	0	0	0	0	0	0	394.615	370.659	152.148	128.769	193.028	209.731	131.048	58.6767	171.766	0	134.107	82.1661	296.852	268.312	153.753	236.099	282.954	0	138.74	186.991	272.191	81.5149	216	56.3607	303.884	202.642	216.901	211.516	137.964	432.607	70.0928	161.041	119.787	125.751	202.642	304.893	293.855	181.019	89.4427
TcCLB.510553.40	42	36	6	0	0	0	0	0	0	216	286.902	223.24	98.9967	58.0948	207.063	223.24	111.746	0	199.128	0	88.7727	101.086	225.062	249.197	234.248	161.858	304.893	131.81	168.442	71.9564	222.331	134.876	243.555	99.6914	270.249	218.706	216.901	237.027	206.176	432.607	152.148	128.769	91.4627	184.424	176.793	272.191	287.892	237.027	40.5343
TcCLB.511173.130	42	36	6	0	0	0	0	0	0	0	380.399	304.893	152.148	96.2341	207.063	225.975	138.74	0	207.063	0	181.869	93.4977	257.74	373.896	225.062	272.191	282.954	153.753	135.646	127.257	281.97	130.287	198.252	49.0521	322.216	198.252	216.901	214.203	159.412	432.607	188.71	131.81	111.024	139.517	137.964	230.559	243.555	194.764	213.306
TcCLB.511173.160	42	36	6	0	0	0	0	0	0	0	317.088	336.719	133.34	105.307	172.601	182.719	101.086	0	207.063	0	117.576	57.5148	203.523	140.296	33.0564	221.422	280.005	156.978	140.296	130.287	254.882	125.751	131.048	50.1543	257.74	141.076	213.306	237.027	213.306	432.607	209.731	160.226	95.5475	59.2605	202.642	272.191	293.855	38.4908	337.763
TcCLB.511173.470	42	36	6	0	0	0	0	0	0	0	310.97	363.142	152.148	108.869	203.523	225.975	138.74	0	207.063	0	181.869	93.4977	257.74	358.87	225.062	251.087	280.005	153.753	135.646	127.257	281.97	125.751	228.722	49.0521	322.216	198.252	216.901	214.203	159.412	432.607	188.71	131.81	111.024	139.517	141.858	203.523	243.555	194.764	238.886
TcCLB.511173.80	42	36	6	0	0	0	0	0	0	0	380.399	321.188	133.34	96.2341	207.063	213.306	88.7727	0	207.063	0	181.869	93.4977	257.74	353.553	225.062	272.191	222.331	153.753	156.978	112.469	306.914	130.287	171.766	49.0521	322.216	174.274	216.901	237.027	213.306	432.607	188.71	131.81	111.024	139.517	208.84	187.85	243.555	174.274	213.306
TcCLB.511221.60	42	36	6	0	0	0	0	0	0	0	391.319	207.951	52.9455	96.9223	203.523	136.417	94.1793	0	195.634	0	103.189	194.764	263.489	268.312	234.248	189.571	282.954	125	176.793	151.348	238.886	111.746	193.895	134.876	310.97	192.161	163.496	203.523	144.999	432.607	161.041	110.304	124.251	169.271	156.17	279.024	268.312	196.506	178.48
TcCLB.511259.1000170	42	36	6	0	0	0	0	0	0	0	317.088	366.357	70.0928	122.757	62.2085	225.062	58.6767	0	163.496	0	141.858	126.503	233.324	231.479	191.297	221.422	280.005	158.599	174.274	151.348	258.696	113.194	252.982	148.957	303.884	299.859	217.802	217.802	213.306	432.607	113.92	110.304	108.869	62.8038	190.433	253.931	286.902	207.951	116.841
TcCLB.511401.120	42	36	6	0	0	0	0	0	0	0	394.615	321.188	124.251	132.575	216	192.161	128.769	0	187.85	0	128.769	108.869	272.191	361.004	210.623	203.523	280.005	165.963	222.331	158.599	291.863	116.841	197.378	134.876	303.884	252.982	215.101	193.895	213.306	432.607	136.417	165.963	158.599	98.3036	217.802	255.834	292.859	240.75	102.486
TcCLB.511401.30	42	36	6	0	0	0	0	0	0	0	394.615	343	125.751	99.6914	218.706	181.869	88.1044	0	195.634	0	125.751	90.1144	281.97	328.406	210.623	214.203	280.005	159.412	190.433	160.226	295.852	116.841	193.895	134.876	241.684	252.982	182.719	217.802	182.719	432.607	136.417	165.963	151.348	99.6914	217.802	255.834	292.859	128.012	77.0048
TcCLB.511401.90	42	36	6	0	0	0	0	0	0	0	391.319	343	106.016	86.7729	174.274	161.041	165.963	0	152.148	0	95.5475	84.7883	272.191	322.216	210.623	203.523	280.005	126.503	190.433	160.226	295.852	116.841	193.895	111.024	303.884	154.557	155.363	225.975	202.642	432.607	105.307	165.963	138.74	154.557	196.506	241.684	330.477	170.933	97.6121
TcCLB.511843.70	42	36	6	0	0	0	0	0	0	0	367.431	370.659	98.9967	80.2176	193.895	156.978	113.194	0	246.371	0	101.086	245.431	218.706	291.863	180.171	209.731	280.005	122.012	176.793	113.194	258.696	120.527	204.406	96.9223	232.401	227.805	190.433	208.84	227.805	432.607	157.788	110.304	60.434	173.437	156.17	223.24	298.856	276.089	170.101
TcCLB.511921.150	42	36	6	0	0	0	0	0	0	0	394.615	363.142	98.9967	62.8038	216	183.571	77.6439	0	155.363	0	116.841	68.8595	263.489	304.893	193.028	213.306	280.005	175.952	241.684	149.752	286.902	116.841	165.139	134.876	310.97	153.753	180.171	187.85	202.642	336.719	202.642	111.746	99.6914	70.0928	217.802	250.142	268.312	111.024	233.324
TcCLB.511921.50	42	36	6	0	0	0	0	0	0	0	367.431	322.216	113.194	49.6022	216	177.636	101.086	0	187.85	0	116.841	80.2176	263.489	304.893	210.623	179.325	280.005	126.503	222.331	166.788	286.902	116.841	207.063	134.876	295.852	227.805	180.171	187.85	202.642	432.607	225.975	111.746	111.024	184.424	217.802	217.802	255.834	152.95	71.9564
TcCLB.506885.480	42	35	7	0	0	0	0	0	0	216	252.034	223.24	98.9967	58.0948	207.063	223.24	111.746	0	175.952	0	88.7727	89.4427	225.062	249.197	234.248	161.858	304.893	131.81	168.442	71.9564	222.331	134.876	243.555	99.6914	270.249	218.706	216.901	237.027	206.176	432.607	152.148	128.769	91.4627	184.424	176.793	272.191	287.892	237.027	40.5343
TcCLB.507071.80	42	35	7	0	0	0	0	0	0	0	368.506	383.664	99.6914	187.85	247.312	216	146.577	151.348	222.331	0	131.048	139.517	325.306	129.527	234.248	272.191	280.005	132.575	171.766	102.486	281.97	69.4752	237.027	49.0521	295.852	204.406	226.89	237.027	206.176	432.607	176.793	110.304	176.793	50.7085	149.752	221.422	272.191	31.6228	179.325
TcCLB.507821.10	42	35	7	0	0	0	0	0	0	0	386.938	264.451	164.317	83.4738	259.652	227.805	101.086	170.101	101.785	0	176.793	0	247.312	255.834	165.139	183.571	237.956	132.575	166.788	133.34	281.97	120.527	190.433	134.876	297.853	182.719	215.101	200.004	147.369	432.607	86.1097	179.325	159.412	109.586	186.991	272.191	275.113	186.134	206.176
TcCLB.508789.120	42	35	7	0	0	0	0	0	0	0	394.615	339.855	108.153	111.746	207.063	141.076	113.194	0	160.226	28.8199	132.575	55.7865	259.652	237.956	198.252	203.523	300.864	96.2341	186.991	163.496	196.506	101.086	158.599	28.3612	307.927	243.555	168.442	237.027	182.719	432.607	156.17	110.304	94.1793	111.746	190.433	210.623	302.876	0	214.203
TcCLB.509867.70	42	35	7	0	0	0	0	0	0	0	394.615	291.863	46.3324	124.251	203.523	30.6789	204.406	170.933	142.641	0	98.3036	0	283.939	98.9967	137.964	251.087	280.005	130.287	229.64	106.727	281.97	134.876	207.063	108.153	295.852	155.363	217.802	237.027	174.274	397.92	214.203	86.7729	57.5148	73.8361	175.112	194.764	343	45.2591	198.252
TcCLB.510115.30	42	35	7	0	0	0	0	0	0	0	315.044	255.834	164.317	83.4738	259.652	227.805	125.751	159.412	101.785	0	176.793	0	247.312	255.834	157.788	183.571	280.005	153.753	166.788	133.34	281.97	120.527	190.433	134.876	297.853	239.818	217.802	200.004	147.369	432.607	64	179.325	148.957	109.586	183.571	213.306	277.066	235.173	164.317
TcCLB.510279.160	42	35	7	0	0	0	0	0	0	0	394.615	339.855	152.148	114.648	193.028	203.523	131.048	64.6009	171.766	0	101.785	82.1661	244.492	268.312	113.194	236.099	280.005	119.048	130.287	125	221.422	119.048	174.274	68.8595	282.954	205.291	217.802	225.975	213.306	432.607	128.012	122.012	101.785	55.7865	148.162	285.913	252.982	116.841	0
TcCLB.505699.10	42	34	8	212.41	293.855	381.486	363.142	454.34	420.189	235.173	364.213	367.431	102.486	190.433	251.087	0	286.902	252.034	151.348	65.8084	123.503	84.1302	253.931	298.856	124.251	173.437	164.317	172.601	299.859	158.599	243.555	269.28	108.153	0	228.722	0	152.148	206.176	419.066	228.722	227.805	95.5475	0	264.451	129.527	302.876	338.809	260.61	0
TcCLB.510697.50	42	34	8	0	0	0	0	0	0	0	317.088	316.065	55.2144	79.5715	218.706	216.901	195.634	211.516	211.516	0	88.1044	0	242.619	265.415	154.557	207.063	282.954	165.963	172.601	130.287	281.97	130.287	147.369	111.024	322.216	68.2456	216.901	217.802	196.506	432.607	103.189	170.101	81.5149	79.5715	208.84	321.188	343	37.4824	332.554
TcCLB.504031.50	41	37	4	0	0	0	0	0	0	0	394.615	331.515	152.148	128.769	209.731	182.719	138.74	0	215.101	0	166.788	73.8361	262.528	135.646	210.623	251.087	282.954	0	180.171	111.024	243.555	89.4427	184.424	41.0507	322.216	187.85	216.901	237.027	135.646	432.607	144.999	131.81	70.0928	79.5715	183.571	246.371	208.84	210.623	279.024
TcCLB.506741.130	41	37	4	0	0	0	0	0	0	0	394.615	291.863	88.7727	133.34	207.063	147.369	116.841	0	189.571	0	137.964	70.7122	200.882	172.601	161.858	251.087	253.931	0	171.766	107.439	224.15	116.841	200.004	54.6442	265.415	169.271	215.101	237.027	174.274	432.607	171.766	155.363	139.517	179.325	217.802	226.89	254.882	210.623	241.684
TcCLB.506789.20	41	37	4	0	0	0	0	0	0	0	261.568	254.882	152.148	131.81	238.886	108.869	125.751	0	180.171	0	131.81	162.676	250.142	70.0928	234.248	272.191	229.64	108.869	185.279	122.757	206.176	95.5475	184.424	88.1044	317.088	180.171	217.802	237.027	206.176	425.819	106.016	94.1793	95.5475	137.964	153.753	247.312	277.066	0	184.424
TcCLB.508011.90	41	37	4	0	0	0	0	0	0	0	394.615	364.213	123.503	103.894	153.753	161.041	90.1144	0	215.101	0	166.788	62.2085	262.528	134.107	210.623	251.087	280.005	0	195.634	160.226	206.176	89.4427	184.424	41.0507	329.441	163.496	217.802	237.027	206.176	432.607	156.17	131.81	112.469	107.439	166.788	203.523	277.066	210.623	241.684
TcCLB.508433.200	41	37	4	0	0	0	0	0	0	0	394.615	345.102	157.788	88.7727	195.634	130.287	110.304	0	246.371	0	108.153	54.6442	158.599	187.85	234.248	251.087	274.138	0	177.636	108.869	281.97	92.1394	172.601	54.6442	186.991	73.8361	217.802	237.027	202.642	364.213	151.348	116.841	67.0233	162.676	176.793	251.087	235.173	221.422	207.951
TcCLB.511259.50	41	37	4	0	0	0	0	0	0	0	305.903	370.659	80.2176	119.048	207.063	255.834	52.9455	0	170.101	0	155.363	94.8626	328.406	51.2647	225.062	221.422	282.954	0	58.0948	63.4009	268.312	114.648	190.433	148.957	272.191	151.348	168.442	237.027	208.84	432.607	214.203	111.746	90.1144	116.109	190.433	277.066	292.859	189.571	207.063
TcCLB.503533.30	41	36	5	0	0	0	0	0	0	0	368.506	370.659	137.964	78.9272	186.134	242.619	116.841	0	172.601	0	55.2144	63.4009	279.024	53.5097	154.557	272.191	304.893	147.369	195.634	158.599	281.97	130.287	144.211	56.3607	293.855	231.479	226.89	237.027	183.571	450.885	172.601	105.307	83.4738	50.7085	175.112	218.706	293.855	107.439	304.893
TcCLB.503827.100	41	36	5	0	0	0	0	0	0	0	327.371	291.863	133.34	166.788	180.171	260.61	161.041	151.348	222.331	0	150.55	139.517	286.902	170.933	210.623	272.191	271.22	0	148.957	118.311	281.97	134.876	233.324	49.0521	301.869	131.048	217.802	237.027	206.176	432.607	112.469	152.95	119.787	61.6151	141.076	202.642	318.111	0	352.493
TcCLB.506067.300	41	36	5	0	0	0	0	0	0	0	394.615	290.869	131.048	122.757	189.571	122.757	134.876	0	211.516	0	0	69.4752	244.492	134.107	157.788	183.571	282.954	140.296	171.766	148.162	281.97	130.287	180.171	47.414	215.101	106.016	217.802	237.027	176.793	432.607	174.274	170.101	70.7122	67.0233	165.139	208.84	264.451	227.805	154.557
TcCLB.506133.130	41	36	5	0	0	0	0	0	0	0	361.004	384.754	58.6767	115.378	207.063	116.109	80.2176	0	261.568	0	103.894	0	283.939	48.504	210.623	207.063	271.22	122.012	169.271	122.757	225.062	130.287	233.324	95.5475	287.892	192.161	217.802	203.523	167.614	397.92	183.571	146.577	130.287	152.95	149.752	217.802	308.94	184.424	215.101
TcCLB.506309.130	41	36	5	0	0	0	0	0	0	0	367.431	352.493	90.1144	123.503	153.753	193.895	96.9223	0	211.516	0	122.012	73.8361	257.74	165.963	128.012	272.191	280.005	0	175.112	109.586	244.492	130.287	128.012	41.0507	322.216	174.274	217.802	237.027	119.048	432.607	78.9272	125	95.5475	48.504	235.173	272.191	324.275	35.9865	380.399
TcCLB.506703.90	41	36	5	0	0	0	0	0	0	0	346.155	253.931	152.148	99.6914	207.063	193.895	107.439	0	207.063	0	104.599	77.0048	158.599	128.769	166.788	245.431	304.893	0	140.296	141.858	268.312	130.287	167.614	49.0521	322.216	154.557	213.306	214.203	174.274	432.607	187.85	160.226	128.769	179.325	208.84	272.191	293.855	35.4924	366.357
TcCLB.507411.10	41	36	5	0	0	0	0	0	0	0	394.615	370.659	38.9984	103.189	150.55	134.107	113.194	0	246.371	0	101.086	176.793	302.876	268.312	151.348	198.252	282.954	0	144.211	151.348	210.623	130.287	139.517	46.3324	243.555	156.17	217.802	237.027	176.793	425.819	169.271	105.307	100.388	194.764	156.17	191.297	247.312	243.555	170.933
TcCLB.507633.80	41	36	5	0	0	0	0	0	0	0	394.615	366.357	83.4738	46.3324	203.523	214.203	103.894	0	127.257	0	138.74	111.024	328.406	217.802	225.062	221.422	280.005	0	115.378	149.752	258.696	113.194	190.433	148.957	301.869	286.902	217.802	237.027	206.176	432.607	170.101	110.304	137.19	75.0983	190.433	201.761	277.066	178.48	207.063
TcCLB.508097.40	41	36	5	0	0	0	0	0	0	0	394.615	269.28	50.7085	59.2605	203.523	56.9367	94.1793	0	199.128	0	96.9223	194.764	196.506	93.4977	41.5692	272.191	271.22	122.757	197.378	121.269	246.371	94.8626	193.028	111.746	272.191	154.557	168.442	237.027	187.85	337.763	125.751	95.5475	0	194.764	156.17	206.176	247.312	297.853	188.71
TcCLB.508143.90	41	36	5	0	0	0	0	0	0	251.087	394.615	292.859	91.4627	83.4738	234.248	193.895	161.041	134.876	195.634	0	68.8595	98.3036	201.761	249.197	204.406	251.087	256.786	113.92	191.297	147.369	150.55	0	186.991	88.1044	289.875	220.516	131.048	166.788	186.134	297.853	263.489	147.369	96.9223	75.0983	196.506	184.424	245.431	167.614	343
TcCLB.508437.20	41	36	5	0	0	0	0	0	0	0	385.846	292.859	121.269	123.503	216	205.291	176.793	215.101	195.634	0	130.287	213.306	306.914	273.164	116.841	272.191	280.005	0	177.636	141.858	274.138	119.048	163.496	85.4481	199.128	185.279	217.802	193.028	208.84	359.936	163.496	121.269	178.48	59.2605	178.48	313.005	243.555	123.503	49.0521
TcCLB.508697.10	41	36	5	0	0	0	0	0	0	0	394.615	256.786	38.9984	103.189	150.55	134.107	113.194	0	246.371	0	101.086	176.793	302.876	268.312	151.348	209.731	280.005	0	123.503	151.348	231.479	130.287	139.517	46.3324	243.555	156.17	217.802	237.027	176.793	425.819	169.271	105.307	100.388	194.764	156.17	191.297	247.312	243.555	170.933
TcCLB.508761.110	41	36	5	0	0	0	0	0	0	0	394.615	264.451	37.4824	86.1097	203.523	220.516	140.296	0	169.271	0	130.287	92.1394	328.406	68.2456	167.614	236.099	280.005	0	130.287	139.517	258.696	113.194	207.951	33.0564	325.306	179.325	215.101	225.975	208.84	432.607	108.869	110.304	68.8595	114.648	135.646	168.442	277.066	221.422	194.764
TcCLB.510085.50	41	36	5	0	0	0	0	0	0	0	394.615	343	123.503	107.439	67.6335	211.516	88.1044	0	151.348	0	122.012	44.7256	187.85	168.442	154.557	272.191	137.964	78.2847	195.634	113.194	295.852	125.751	181.019	53.5097	322.216	152.148	217.802	237.027	206.176	432.607	141.858	131.81	111.024	139.517	137.964	247.312	249.197	0	380.399
TcCLB.510483.60	41	36	5	0	0	0	0	0	0	0	394.615	294.853	131.048	68.2456	207.063	165.139	77.0048	0	246.371	0	128.769	88.1044	188.71	155.363	141.076	251.087	280.005	137.19	171.766	119.048	291.863	130.287	178.48	69.4752	247.312	175.112	217.802	237.027	174.274	432.607	105.307	56.3607	94.1793	162.676	61.6151	223.24	298.856	122.012	381.486
TcCLB.510487.100070	41	36	5	0	0	0	0	0	0	0	394.615	294.853	131.048	68.2456	207.063	165.139	77.0048	0	246.371	0	177.636	80.2176	188.71	155.363	141.076	207.063	280.005	137.19	171.766	119.048	281.97	92.1394	160.226	134.876	247.312	212.41	149.752	237.027	174.274	432.607	105.307	56.3607	94.1793	162.676	61.6151	223.24	308.94	122.012	372.816
TcCLB.510537.40	41	36	5	0	0	0	0	0	0	0	338.809	363.142	133.34	116.841	151.348	148.957	132.575	0	195.634	0	223.24	67.6335	300.864	56.9367	110.304	187.85	253.931	141.858	194.764	121.269	286.902	130.287	192.161	44.1942	226.89	158.599	181.019	237.027	144.999	354.615	78.9272	125.751	54.6442	84.1302	190.433	189.571	318.111	0	340.902
TcCLB.510693.240	41	36	5	0	0	0	0	0	0	0	362.073	272.191	76.3675	133.34	161.041	157.788	147.369	197.378	153.753	0	75.0983	0	283.939	141.076	148.162	272.191	280.005	0	171.766	113.194	206.176	134.876	225.062	41.5692	260.61	113.194	217.802	237.027	165.139	432.607	64.6009	79.5715	114.648	82.8191	190.433	221.422	318.111	32.5762	315.044
TcCLB.510693.270	41	36	5	0	0	0	0	0	0	0	386.938	318.111	157.788	106.016	122.012	225.062	94.1793	0	191.297	0	130.287	0	247.312	141.858	225.062	251.087	256.786	156.978	158.599	137.964	281.97	134.876	219.61	49.0521	295.852	158.599	181.019	237.027	148.162	359.936	123.503	79.5715	114.648	82.8191	190.433	319.136	254.882	255.834	211.516
TcCLB.510933.10	41	36	5	0	0	0	0	0	0	0	368.506	384.754	77.0048	119.048	144.211	165.139	92.8177	0	127.257	0	173.437	89.4427	200.004	113.92	198.252	251.087	137.19	152.95	149.752	140.296	278.045	130.287	202.642	108.153	279.024	137.964	128.769	237.027	202.642	305.903	152.148	144.211	126.503	61.6151	193.028	229.64	209.731	144.999	335.676
TcCLB.511173.230	41	36	5	0	0	0	0	0	0	0	389.127	270.249	133.34	104.599	207.063	182.719	101.086	0	207.063	0	116.841	47.414	210.623	154.557	161.858	251.087	254.882	107.439	140.296	130.287	281.97	116.841	189.571	49.0521	322.216	198.252	213.306	237.027	170.933	432.607	234.248	170.101	109.586	86.1097	133.34	215.101	287.892	0	347.209
TcCLB.511233.140	41	36	5	0	0	0	0	0	29.281	225.975	389.127	336.719	84.7883	204.406	243.555	258.696	176.793	185.279	174.274	0	104.599	183.571	237.956	247.312	193.028	272.191	256.786	68.8595	185.279	161.858	200.882	0	186.991	104.599	252.034	177.636	217.802	237.027	200.882	432.607	193.028	107.439	60.434	113.92	196.506	156.978	240.75	144.211	51.2647
TcCLB.511919.20	41	36	5	0	0	0	0	0	0	0	310.97	280.005	79.5715	82.8191	218.706	181.869	131.048	0	171.766	0	82.1661	68.8595	272.191	317.088	210.623	179.325	280.005	0	165.139	147.369	262.528	103.894	216	134.876	310.97	172.601	180.171	225.975	213.306	432.607	161.041	127.257	161.041	79.5715	217.802	285.913	268.312	132.575	101.086
TcCLB.453767.20	41	35	6	0	0	0	0	0	0	0	276.089	353.553	141.858	151.348	193.028	61.0236	98.9967	0	195.634	0	96.9223	194.764	219.61	173.437	208.84	152.148	240.75	94.1793	148.957	151.348	161.858	111.746	0	108.153	310.97	195.634	217.802	177.636	183.571	337.763	179.325	100.388	133.34	194.764	156.17	181.019	213.306	276.089	207.063
TcCLB.503633.40	41	35	6	0	0	0	0	0	0	0	345.102	235.173	64.6009	80.2176	167.614	177.636	85.4481	0	157.788	0	72.5812	187.85	315.044	74.4663	0	221.422	219.61	122.757	134.107	108.153	268.312	130.287	148.957	31.6228	228.722	192.161	182.719	198.252	188.71	294.853	72.5812	33.539	60.434	164.317	156.17	220.516	247.312	239.818	141.076
TcCLB.503717.10	41	35	6	0	0	0	0	0	0	0	340.902	339.855	152.148	154.557	179.325	209.731	155.363	225.975	193.895	0	130.287	178.48	325.306	144.211	234.248	236.099	280.005	150.55	161.858	141.858	198.252	113.194	176.793	83.4738	237.027	195.634	217.802	211.516	170.933	339.855	159.412	113.194	171.766	50.7085	120.527	262.528	264.451	136.417	112.469
TcCLB.504155.20	41	35	6	0	0	0	0	0	0	0	285.913	347.209	164.317	77.0048	186.991	198.252	138.74	144.211	144.211	0	141.858	94.8626	315.044	275.113	150.55	193.028	282.954	175.952	180.171	186.991	252.982	108.869	192.161	97.6121	334.634	207.063	181.019	237.027	202.642	432.607	84.1302	183.571	142.641	113.92	196.506	242.619	242.619	186.991	193.895
TcCLB.504201.30	41	35	6	0	0	0	0	0	0	0	335.676	318.111	108.153	111.024	206.176	216	124.251	219.61	191.297	0	125.751	75.0983	275.113	276.089	225.062	224.15	282.954	152.95	185.279	181.019	227.805	130.287	189.571	105.307	247.312	129.527	215.101	206.176	176.793	432.607	152.148	134.876	74.4663	111.746	202.642	230.559	263.489	150.55	218.706
TcCLB.504261.20	41	35	6	0	0	0	0	0	0	0	394.615	252.034	109.586	139.517	203.523	252.034	171.766	0	169.271	0	101.785	0	272.191	321.188	204.406	272.191	280.005	172.601	171.766	148.162	281.97	130.287	172.601	134.876	252.034	110.304	217.802	237.027	148.162	432.607	70.7122	161.041	118.311	59.2605	186.991	272.191	292.859	104.599	135.646
TcCLB.506245.250	41	35	6	0	0	0	0	0	0	0	351.434	272.191	73.8361	133.34	155.363	207.951	147.369	181.869	211.516	0	95.5475	0	283.939	127.257	131.048	272.191	253.931	0	195.634	137.964	212.41	130.287	219.61	42.0899	260.61	163.496	217.802	237.027	227.805	450.885	64.6009	147.369	83.4738	85.4481	190.433	215.101	278.045	40.5343	332.554
TcCLB.506813.190	41	35	6	0	0	0	0	0	0	0	373.896	215.101	40.5343	151.348	203.523	140.296	73.2078	0	217.802	0	114.648	0	167.614	100.388	135.646	272.191	280.005	165.963	177.636	143.425	262.528	130.287	219.61	100.388	274.138	148.162	156.978	222.331	170.933	432.607	107.439	79.5715	92.8177	82.8191	139.517	215.101	322.216	49.0521	334.634
TcCLB.506813.80	41	35	6	0	0	0	0	0	0	0	385.846	275.113	98.9967	97.6121	245.431	237.956	119.048	44.1942	176.793	0	127.257	81.5149	252.982	55.7865	180.171	221.422	280.005	151.348	169.271	161.858	281.97	116.841	170.101	116.109	307.927	148.162	217.802	237.027	148.162	432.607	176.793	154.557	166.788	161.858	175.112	327.371	330.477	181.869	77.0048
TcCLB.507071.390	41	35	6	0	0	0	0	0	0	0	368.506	263.489	78.9272	133.34	199.128	170.101	98.3036	165.963	176.793	0	98.3036	0	283.939	131.048	161.858	251.087	280.005	0	129.527	151.348	258.696	116.841	216	111.024	279.024	191.297	217.802	237.027	148.162	432.607	166.788	86.7729	57.5148	73.8361	133.34	194.764	318.111	37.9855	283.939
TcCLB.508365.190	41	35	6	0	0	0	0	0	0	0	294.853	353.553	118.311	101.086	151.348	264.451	86.7729	0	155.363	0	106.016	34.0239	315.044	199.128	208.84	272.191	243.555	119.787	124.251	114.648	286.902	95.5475	216	37.9855	254.882	214.203	186.991	237.027	208.84	432.607	84.7883	116.841	147.369	152.95	137.19	230.559	305.903	162.676	372.816
TcCLB.508455.20	41	35	6	0	0	0	0	0	0	0	327.371	376.06	76.3675	62.8038	169.271	223.24	106.727	0	211.516	0	85.4481	72.5812	256.786	236.099	210.623	272.191	280.005	119.787	140.296	141.858	164.317	134.876	129.527	91.4627	299.859	195.634	217.802	237.027	213.306	432.607	124.251	128.769	82.8191	168.442	158.599	159.412	275.113	237.027	49.0521
TcCLB.508979.50	41	35	6	0	0	0	0	0	0	0	283.939	307.927	33.0564	52.3832	184.424	211.516	61.0236	0	152.148	0	180.171	80.2176	274.138	0	234.248	236.099	280.005	143.425	184.424	141.858	241.684	84.7883	185.279	111.746	325.306	185.279	217.802	237.027	208.84	432.607	112.469	110.304	124.251	56.9367	133.34	189.571	277.066	193.895	225.062
TcCLB.509525.20	41	35	6	0	0	0	0	0	0	0	267.345	331.515	108.869	36.9815	155.363	234.248	52.3832	0	154.557	0	0	58.6767	328.406	294.853	157.788	272.191	243.555	125.751	141.076	143.425	286.902	130.287	213.306	46.3324	280.987	214.203	217.802	237.027	208.84	432.607	151.348	111.746	70.0928	122.757	148.162	253.931	216.901	180.171	185.279
TcCLB.509527.120	41	35	6	0	0	0	0	0	0	0	305.903	384.754	118.311	106.727	137.19	243.555	98.9967	0	169.271	0	242.619	78.2847	315.044	194.764	156.17	272.191	280.005	119.787	124.251	128.769	268.312	95.5475	216	46.3324	285.913	202.642	217.802	237.027	208.84	432.607	84.7883	90.1144	139.517	152.95	113.194	234.248	305.903	161.041	372.816
TcCLB.509753.270	41	35	6	0	0	0	0	0	0	0	341.951	350.376	164.317	119.787	282.954	174.274	135.646	158.599	193.895	0	139.517	206.176	254.882	163.496	225.062	251.087	282.954	104.599	185.279	125.751	252.982	130.287	204.406	105.307	305.903	147.369	181.019	237.027	230.559	432.607	152.148	131.81	82.8191	68.2456	169.271	286.902	320.161	194.764	315.044
TcCLB.510275.260	41	35	6	0	0	0	0	0	0	0	379.312	384.754	113.194	159.412	209.731	260.61	192.161	111.024	198.252	0	115.378	61.0236	298.856	196.506	167.614	272.191	282.954	164.317	186.134	194.764	183.571	94.8626	195.634	90.1144	240.75	234.248	217.802	236.099	213.306	425.819	119.787	116.841	146.577	76.3675	235.173	225.062	283.939	181.019	75.732
TcCLB.510275.350	41	35	6	0	0	0	0	0	0	0	338.809	314.024	113.194	124.251	209.731	260.61	192.161	111.024	198.252	0	115.378	61.0236	298.856	196.506	167.614	272.191	282.954	164.317	186.134	194.764	198.252	94.8626	195.634	90.1144	225.062	200.004	217.802	221.422	206.176	337.763	106.727	146.577	77.0048	87.4378	190.433	225.062	297.853	181.019	86.1097
TcCLB.510465.100	41	35	6	0	0	0	0	0	0	0	366.357	258.696	128.012	174.274	272.191	198.252	122.757	101.086	184.424	0	111.024	106.016	298.856	236.099	167.614	272.191	280.005	161.858	209.731	115.378	252.982	95.5475	200.882	84.1302	315.044	176.793	155.363	237.027	170.933	432.607	179.325	125	108.869	106.016	79.5715	257.74	308.94	129.527	307.927
TcCLB.510715.90	41	35	6	0	0	0	0	0	0	0	394.615	297.853	145.787	112.469	188.71	194.764	121.269	30.6789	195.634	0	137.964	120.527	223.24	110.304	169.271	155.363	280.005	175.952	201.761	98.9967	254.882	120.527	161.041	84.7883	238.886	171.766	182.719	217.802	206.176	432.607	216	116.841	120.527	95.5475	169.271	297.853	231.479	195.634	195.634
TcCLB.510933.80	41	35	6	0	0	0	0	0	0	0	278.045	343	108.153	125.751	243.555	206.176	124.251	219.61	191.297	0	125.751	75.0983	275.113	276.089	225.062	224.15	282.954	152.95	185.279	186.991	286.902	120.527	168.442	105.307	247.312	161.858	215.101	206.176	176.793	432.607	152.148	144.211	74.4663	111.746	202.642	230.559	263.489	150.55	196.506
TcCLB.511063.140	41	35	6	0	0	0	0	0	0	0	374.977	324.275	115.378	166.788	173.437	180.171	182.719	137.19	222.331	0	148.162	141.858	306.914	170.101	191.297	272.191	271.22	97.6121	140.296	135.646	268.312	110.304	213.306	97.6121	272.191	170.933	0	157.788	198.252	432.607	69.4752	128.769	151.348	90.7877	185.279	377.143	305.903	191.297	266.379
TcCLB.511089.80	41	35	6	0	0	0	0	0	0	0	394.615	273.164	157.788	137.964	203.523	260.61	117.576	74.4663	176.793	0	166.788	81.5149	291.863	117.576	165.139	251.087	280.005	118.311	165.139	128.769	281.97	103.189	216	114.648	260.61	136.417	168.442	225.975	202.642	432.607	102.486	90.1144	54.6442	161.858	174.274	185.279	290.869	168.442	118.311
TcCLB.511173.370	41	35	6	0	0	0	0	0	0	0	356.74	331.515	141.858	104.599	165.963	171.766	112.469	0	125	0	96.2341	0	246.371	165.963	173.437	251.087	253.931	156.978	140.296	127.257	295.852	125.751	211.516	95.5475	301.869	143.425	141.076	237.027	177.636	432.607	172.601	146.577	149.752	144.999	149.752	215.101	343	30.6789	359.936
TcCLB.511349.20	41	35	6	0	0	0	0	0	0	0	394.615	162.676	52.9455	96.9223	203.523	63.4009	0	52.3832	199.128	0	96.9223	112.469	263.489	260.61	156.978	213.306	282.954	146.577	176.793	108.869	196.506	124.251	193.895	111.024	317.088	198.252	129.527	144.999	156.978	374.977	207.951	92.8177	124.251	169.271	156.17	205.291	247.312	253.931	161.858
TcCLB.511625.130	41	35	6	0	0	0	0	0	0	0	367.431	331.515	141.858	163.496	285.913	201.761	101.785	207.951	198.252	0	121.269	128.769	190.433	244.492	202.642	251.087	200.004	172.601	176.793	147.369	254.882	130.287	171.766	116.109	243.555	125.751	217.802	217.802	206.176	397.92	137.964	174.274	128.012	61.6151	193.028	250.142	320.161	149.752	288.883
TcCLB.506245.100060	41	34	7	0	0	0	0	0	0	0	391.319	343	164.317	119.787	207.063	184.424	133.34	0	195.634	0	92.8177	0	212.41	295.852	210.623	201.761	282.954	158.599	171.766	113.194	281.97	134.876	230.559	134.876	265.415	191.297	215.101	237.027	181.019	432.607	78.9272	125	54.6442	82.8191	123.503	221.422	318.111	42.0899	315.044
TcCLB.506955.240	41	34	7	0	0	0	0	0	0	184.424	361.004	299.859	41.5692	91.4627	218.706	211.516	58.6767	0	175.952	0	106.727	96.9223	280.005	298.856	165.139	221.422	282.954	135.646	190.433	192.161	239.818	111.024	265.415	98.9967	270.249	182.719	156.978	171.766	181.019	393.515	181.869	162.676	94.1793	161.041	193.028	306.914	279.024	200.882	261.568
TcCLB.506973.10	41	34	7	0	0	0	0	0	0	0	394.615	330.477	140.296	122.757	285.913	181.019	101.086	123.503	184.424	0	112.469	86.1097	295.852	248.254	193.028	272.191	282.954	164.317	168.442	115.378	254.882	101.086	129.527	103.894	310.97	205.291	220.516	237.027	206.176	374.977	179.325	161.041	178.48	106.016	134.876	323.245	293.855	134.876	81.5149
TcCLB.508165.200	41	34	7	0	0	0	0	0	0	0	394.615	283.939	112.469	132.575	245.431	243.555	193.895	194.764	155.363	0	143.425	161.041	239.818	350.376	234.248	272.191	282.954	125.751	219.61	119.787	241.684	85.4481	183.571	108.153	285.913	200.004	226.89	222.331	206.176	432.607	190.433	120.527	133.34	180.171	160.226	321.188	324.275	145.787	110.304
TcCLB.508221.590	41	34	7	0	0	0	0	0	0	258.696	394.615	345.102	97.6121	161.041	165.139	181.019	116.841	105.307	193.895	0	164.317	99.6914	193.028	241.684	169.271	272.191	277.066	0	193.028	95.5475	295.852	134.876	265.415	148.957	295.852	108.869	226.89	200.004	193.895	432.607	225.975	165.963	96.2341	207.951	190.433	274.138	307.927	134.876	223.24
TcCLB.508221.650	41	34	7	0	0	0	0	0	0	258.696	290.869	287.892	153.753	95.5475	207.063	197.378	128.769	0	217.802	0	118.311	108.869	175.112	198.252	173.437	272.191	282.954	208.84	190.433	135.646	293.855	134.876	217.802	117.576	301.869	200.882	190.433	197.378	235.173	432.607	183.571	82.8191	83.4738	163.496	133.34	245.431	279.024	106.727	274.138
TcCLB.508293.10	41	34	7	0	0	0	0	0	0	0	394.615	322.216	108.869	193.895	249.197	131.81	111.746	106.016	184.424	0	113.92	104.599	288.883	236.099	167.614	272.191	280.005	164.317	135.646	115.378	254.882	71.9564	190.433	98.9967	252.034	176.793	217.802	237.027	206.176	432.607	151.348	113.194	146.577	76.3675	149.752	236.099	252.034	129.527	101.086
TcCLB.510279.320	41	34	7	0	0	0	0	0	0	0	380.399	291.863	133.34	154.557	242.619	216.901	171.766	230.559	222.331	0	142.641	151.348	325.306	373.896	161.858	236.099	280.005	184.424	161.858	109.586	198.252	113.194	176.793	83.4738	237.027	200.882	217.802	211.516	170.933	393.515	159.412	113.194	139.517	50.7085	125	229.64	314.024	165.963	366.357
TcCLB.510503.50	41	34	7	0	0	0	0	0	0	0	328.406	339.855	108.153	103.894	207.063	133.34	104.599	0	142.641	31.6228	132.575	92.8177	259.652	237.956	204.406	251.087	282.954	96.2341	162.676	163.496	295.852	130.287	209.731	32.0983	301.869	231.479	168.442	237.027	206.176	379.312	136.417	165.963	38.4908	58.0948	117.576	276.089	280.987	134.107	92.8177
TcCLB.510625.40	41	34	7	0	0	0	0	0	0	0	280.987	237.027	152.148	132.575	253.931	122.012	133.34	106.016	165.139	0	120.527	106.016	315.044	236.099	167.614	272.191	277.066	164.317	158.599	115.378	286.902	134.876	200.004	98.9967	315.044	135.646	198.252	237.027	202.642	432.607	154.557	161.041	108.869	90.7877	151.348	257.74	308.94	129.527	271.22
TcCLB.510715.150	41	34	7	0	0	0	0	0	0	0	391.319	269.28	110.304	81.5149	207.063	165.139	71.3334	0	156.978	0	104.599	0	167.614	244.492	210.623	272.191	280.005	114.648	201.761	111.024	286.902	130.287	193.028	54.6442	243.555	135.646	226.89	237.027	172.601	432.607	125	116.841	121.269	115.378	141.076	156.978	324.275	33.0564	227.805
TcCLB.511063.1000100	41	34	7	0	0	0	0	0	0	0	313.005	146.577	91.4627	150.55	156.978	213.306	186.991	182.719	198.252	0	148.162	174.274	259.652	280.005	157.788	236.099	234.248	119.787	140.296	141.858	254.882	101.086	158.599	89.4427	259.652	165.963	217.802	207.063	202.642	432.607	151.348	103.189	141.076	36.9815	186.991	302.876	265.415	142.641	115.378
TcCLB.509755.50	41	33	8	0	0	0	0	0	0	0	308.94	384.754	164.317	119.787	282.954	174.274	135.646	158.599	193.895	0	139.517	206.176	249.197	228.722	225.062	221.422	280.005	128.012	154.557	125.751	252.982	130.287	233.324	101.785	235.173	176.793	180.171	237.027	230.559	432.607	123.503	116.841	84.7883	101.785	202.642	217.802	251.087	168.442	292.859
TcCLB.511839.40	41	33	8	0	0	0	0	0	41.5692	250.142	333.594	364.213	92.1394	158.599	216	187.85	71.3334	170.101	166.788	0	161.858	142.641	219.61	291.863	180.171	209.731	280.005	116.109	186.134	113.194	258.696	120.527	204.406	96.9223	232.401	227.805	190.433	237.027	227.805	432.607	157.788	127.257	62.8038	125.751	185.279	178.48	310.97	116.841	0
TcCLB.506717.80	41	28	13	0	0	0	0	0	0	0	348.263	350.376	88.7727	549.647	229.64	112.469	483.472	0	137.19	31.1496	152.148	132.575	286.902	253.931	115.378	158.599	552.106	0	187.85	147.369	234.248	108.153	102.486	0	241.684	223.24	134.876	232.401	160.226	288.883	188.71	215.101	0	180.171	211.516	268.312	201.761	208.84	441.715
TcCLB.509843.100020	41	28	13	0	0	0	0	0	0	141.858	254.882	358.87	45.2591	524.047	221.422	155.363	439.432	0	113.92	175.112	186.991	108.153	207.063	208.84	116.841	158.599	503.623	0	184.424	108.869	194.764	0	129.527	0	197.378	261.568	226.89	213.306	160.226	264.451	211.516	156.978	0	101.785	209.731	251.087	201.761	242.619	368.506
TcCLB.508521.100	41	27	14	0	0	0	0	0	0	250.142	368.506	277.066	117.576	464.758	195.634	858.088	326.338	0	136.417	143.425	177.636	39.5082	241.684	303.884	103.894	158.599	508.404	0	177.636	124.251	180.171	0	198.252	0	263.489	269.28	114.648	196.506	227.805	262.528	131.81	215.101	0	147.369	214.203	268.312	175.112	255.834	245.431
TcCLB.509581.10	41	26	15	0	0	0	0	0	0	237.027	384.754	298.856	0	504.817	237.956	746.62	383.664	0	152.148	176.793	119.787	101.086	256.786	291.863	90.7877	158.599	485.828	0	184.424	147.369	183.571	94.1793	207.951	0	263.489	295.852	168.442	200.004	134.876	300.864	175.112	212.41	0	176.793	237.956	253.931	187.85	207.951	429.209
TcCLB.508261.80	40	37	3	0	0	0	0	0	0	0	291.863	246.371	152.148	131.81	238.886	117.576	125.751	0	138.74	0	131.81	162.676	250.142	41.5692	225.062	272.191	119.787	0	185.279	137.964	206.176	110.304	184.424	88.1044	38.4908	109.586	182.719	237.027	206.176	432.607	106.016	116.109	95.5475	137.964	158.599	247.312	277.066	0	184.424
TcCLB.508873.330	40	36	4	0	0	0	0	0	0	0	391.319	334.634	157.788	88.1044	202.642	234.248	114.648	0	154.557	0	144.999	64	251.087	45.2591	225.062	219.61	240.75	167.614	174.274	141.858	207.063	130.287	257.74	46.3324	262.528	141.858	168.442	208.84	159.412	337.763	148.162	108.869	176.793	118.311	180.171	262.528	274.138	0	128.769
TcCLB.509665.100030	40	36	4	0	0	0	0	0	0	0	327.371	298.856	86.1097	109.586	202.642	166.788	99.6914	0	125	0	0	193.028	137.19	152.148	169.271	272.191	282.954	134.876	158.599	163.496	270.249	134.876	156.978	100.388	283.939	165.139	156.17	206.176	173.437	432.607	169.271	0	64	219.61	151.348	207.063	308.94	164.317	194.764
TcCLB.510483.250	40	36	4	0	0	0	0	0	0	0	362.073	363.142	110.304	138.74	203.523	133.34	67.6335	0	236.099	0	186.991	0	283.939	55.2144	124.251	272.191	280.005	0	175.112	137.964	252.982	130.287	205.291	134.876	307.927	148.162	184.424	237.027	167.614	432.607	159.412	146.577	119.787	144.999	162.676	182.719	308.94	240.75	165.963
TcCLB.511449.70	40	36	4	0	0	0	0	0	0	0	394.615	270.249	109.586	107.439	203.523	127.257	113.92	0	217.802	0	144.999	85.4481	283.939	144.999	193.028	251.087	280.005	0	171.766	122.012	225.062	134.876	139.517	0	301.869	168.442	226.89	181.869	202.642	432.607	183.571	134.107	116.109	117.576	134.876	217.802	286.902	165.139	147.369
TcCLB.470561.20001	40	35	5	0	0	0	0	0	0	0	394.615	275.113	98.9967	97.6121	245.431	238.886	119.048	74.4663	176.793	0	127.257	81.5149	291.863	40.0202	191.297	251.087	282.954	0	197.378	90.1144	281.97	116.841	190.433	98.3036	220.516	88.7727	217.802	237.027	174.274	432.607	157.788	117.576	100.388	61.6151	202.642	186.134	247.312	88.1044	189.571
TcCLB.503587.30	40	35	5	0	0	0	0	0	0	0	291.863	298.856	129.527	88.7727	175.112	255.834	114.648	0	225.062	0	190.433	46.8722	283.939	154.557	161.858	272.191	282.954	130.287	175.112	144.211	281.97	116.841	177.636	93.4977	249.197	150.55	217.802	237.027	152.95	413.466	225.975	154.557	122.757	181.019	155.363	236.099	268.312	221.422	63.4009
TcCLB.506285.100030	40	35	5	0	0	0	0	0	0	0	394.615	215.101	114.648	105.307	163.496	100.388	122.757	0	128.769	0	0	112.469	348.263	276.089	169.271	272.191	233.324	0	152.95	112.469	216.901	125.751	185.279	41.5692	243.555	215.101	217.802	198.252	213.306	432.607	152.148	110.304	90.1144	122.757	183.571	198.252	324.275	186.134	174.274
TcCLB.506339.10	40	35	5	0	0	0	0	0	0	0	301.869	265.415	128.012	91.4627	211.516	225.975	111.024	228.722	217.802	0	192.161	88.7727	313.005	247.312	225.062	221.422	282.954	72.5812	209.731	152.95	254.882	0	167.614	101.785	274.138	207.063	217.802	237.027	227.805	397.92	184.424	116.841	84.7883	101.785	202.642	256.786	251.087	168.442	257.74
TcCLB.506967.60	40	35	5	0	0	0	0	0	0	0	366.357	331.515	125.751	108.869	175.952	262.528	232.401	178.48	211.516	0	96.9223	0	283.939	175.112	183.571	272.191	256.786	0	140.296	133.34	225.062	130.287	169.271	54.6442	322.216	198.252	226.89	214.203	213.306	432.607	234.248	160.226	163.496	139.517	178.48	259.652	324.275	0	359.936
TcCLB.507069.1000120	40	35	5	0	0	0	0	0	0	0	338.809	316.065	133.34	112.469	203.523	225.062	103.894	0	241.684	0	109.586	59.2605	154.557	168.442	122.012	272.191	224.15	148.162	171.766	151.348	281.97	95.5475	200.004	90.7877	275.113	145.787	216.901	217.802	170.933	432.607	263.489	170.101	152.95	139.517	183.571	272.191	226.89	144.999	331.515
TcCLB.507523.70	40	35	5	0	0	0	0	0	0	0	394.615	343	133.34	119.048	203.523	195.634	94.8626	0	172.601	0	117.576	62.2085	193.895	60.434	180.171	272.191	280.005	131.048	171.766	68.2456	281.97	130.287	155.363	56.3607	295.852	192.161	217.802	237.027	187.85	450.885	176.793	170.101	163.496	145.787	208.84	251.087	330.477	178.48	82.8191
TcCLB.507747.180	40	35	5	0	0	0	0	0	0	0	0	0	44.7256	96.9223	213.306	155.363	102.486	0	195.634	0	96.9223	194.764	225.975	141.076	202.642	272.191	280.005	146.577	172.601	127.257	207.063	111.746	193.895	148.957	285.913	180.171	217.802	177.636	156.978	370.659	125.751	110.304	124.251	194.764	160.226	198.252	268.312	297.853	161.858
TcCLB.508011.120	40	35	5	0	0	0	0	0	0	0	0	0	133.34	128.769	151.348	182.719	107.439	0	195.634	0	71.9564	57.5148	274.138	128.769	210.623	251.087	280.005	76.3675	175.112	103.894	219.61	134.876	243.555	37.4824	322.216	139.517	217.802	181.019	155.363	432.607	65.2037	125.751	131.81	179.325	210.623	269.28	237.956	210.623	236.099
TcCLB.508221.870	40	35	5	0	0	0	0	0	0	0	394.615	370.659	118.311	131.81	203.523	159.412	100.388	0	166.788	0	98.9967	100.388	56.9367	196.506	169.271	183.571	230.559	106.727	142.641	118.311	286.902	125.751	223.24	100.388	274.138	252.982	217.802	217.802	227.805	315.044	191.297	110.304	92.8177	75.0983	178.48	255.834	279.024	141.858	347.209
TcCLB.509899.100	40	35	5	0	0	0	0	0	0	0	394.615	363.142	108.869	65.8084	216	168.442	119.048	0	187.85	0	65.2037	77.6439	272.191	135.646	210.623	179.325	280.005	126.503	222.331	166.788	286.902	116.841	177.636	134.876	283.939	192.161	215.101	186.134	202.642	432.607	120.527	146.577	151.348	83.4738	170.933	233.324	298.856	111.024	166.788
TcCLB.510237.80	40	35	5	0	0	0	0	0	0	0	337.763	384.754	97.6121	103.894	225.975	220.516	125.751	177.636	222.331	0	132.575	80.2176	201.761	291.863	202.642	272.191	280.005	97.6121	185.279	125.751	252.982	0	186.991	101.785	301.869	151.348	215.101	237.027	202.642	432.607	154.557	131.81	82.8191	89.4427	165.139	200.882	320.161	194.764	193.028
TcCLB.510583.1000140	40	35	5	0	0	0	0	0	0	0	361.004	227.805	52.9455	0	216	125	114.648	199.128	215.101	0	148.162	104.599	220.516	200.004	157.788	180.171	185.279	125	138.74	117.576	166.788	113.194	139.517	148.957	254.882	187.85	173.437	208.84	208.84	432.607	186.134	92.8177	0	165.963	144.999	304.893	279.024	170.101	388.032
TcCLB.511099.100020	40	35	5	0	0	0	0	0	0	0	280.987	350.376	108.869	106.727	188.71	157.788	104.599	0	162.676	0	209.731	92.1394	213.306	144.211	173.437	180.171	222.331	0	152.148	132.575	252.982	125.751	246.371	113.92	322.216	172.601	217.802	237.027	170.933	432.607	107.439	94.1793	71.9564	122.757	176.793	224.15	324.275	160.226	388.032
TcCLB.511173.280	40	35	5	0	0	0	0	0	0	0	333.594	353.553	131.048	139.517	285.913	159.412	141.076	172.601	191.297	0	109.586	62.2085	325.306	243.555	234.248	251.087	282.954	0	209.731	133.34	252.982	130.287	198.252	49.0521	322.216	198.252	226.89	237.027	213.306	432.607	174.274	144.211	158.599	111.746	202.642	205.291	303.884	173.437	288.883
TcCLB.511255.1000110	40	35	5	0	0	0	0	0	0	0	384.754	322.216	164.317	85.4481	189.571	197.378	128.769	0	217.802	0	118.311	116.841	163.496	243.555	186.134	272.191	282.954	149.752	210.623	109.586	221.422	134.876	223.24	137.964	307.927	168.442	217.802	217.802	188.71	421.313	86.1097	101.785	83.4738	165.963	155.363	245.431	279.024	139.517	216.901
TcCLB.511603.90	40	35	5	0	0	0	0	0	0	0	356.74	383.664	164.317	139.517	234.248	120.527	186.991	270.249	222.331	0	141.076	131.048	325.306	277.066	225.062	272.191	282.954	113.92	185.279	154.557	252.982	0	186.991	80.8653	259.652	195.634	180.171	225.975	200.882	432.607	113.194	161.041	113.92	64.6009	168.442	299.859	237.027	183.571	263.489
TcCLB.511643.110	40	35	5	0	0	0	0	0	31.1496	241.684	297.853	269.28	0	84.7883	191.297	176.793	106.016	0	161.041	0	99.6914	107.439	256.786	132.575	202.642	236.099	280.005	0	85.4481	128.012	241.684	134.876	197.378	92.1394	293.855	192.161	217.802	196.506	202.642	397.92	100.388	150.55	158.599	79.5715	157.788	242.619	292.859	145.787	89.4427
TcCLB.511643.70	40	35	5	0	0	0	0	0	0	0	346.155	269.28	0	84.7883	223.24	122.757	111.746	0	199.128	0	106.727	94.8626	263.489	258.696	225.062	236.099	280.005	134.107	183.571	121.269	241.684	116.841	233.324	92.1394	293.855	216.901	217.802	196.506	202.642	432.607	102.486	107.439	154.557	95.5475	157.788	283.939	292.859	194.764	0
TcCLB.511923.60	40	35	5	0	0	0	0	0	0	0	394.615	307.927	108.869	83.4738	216	186.991	130.287	0	151.348	0	114.648	64	241.684	173.437	210.623	184.424	300.864	126.503	133.34	132.575	286.902	116.841	190.433	108.153	297.853	182.719	180.171	225.975	227.805	377.143	175.112	150.55	141.858	147.369	217.802	250.142	242.619	126.503	63.4009
TcCLB.432629.10	40	34	6	0	0	0	0	0	0	0	394.615	248.254	37.9855	72.5812	223.24	0	42.6128	0	175.952	0	72.5812	112.469	176.793	65.2037	125.751	251.087	200.004	92.8177	132.575	87.4378	151.348	95.5475	161.858	103.894	249.197	192.161	168.442	203.523	113.194	305.903	86.7729	110.304	124.251	194.764	127.257	189.571	0	207.063	193.028
TcCLB.504787.40	40	34	6	0	0	0	0	0	0	0	394.615	317.088	131.81	84.1302	285.913	195.634	97.6121	207.951	198.252	0	122.012	128.769	190.433	244.492	202.642	251.087	200.004	145.787	209.731	147.369	207.951	120.527	216	109.586	259.652	204.406	177.636	237.027	227.805	432.607	172.601	110.304	161.041	180.171	145.787	280.005	303.884	132.575	36.4829
TcCLB.505949.100	40	34	6	0	0	0	0	0	0	0	298.856	319.136	71.9564	106.727	54.6442	146.577	86.1097	0	170.101	0	173.437	89.4427	211.516	134.876	225.062	272.191	282.954	161.041	136.417	144.211	254.882	130.287	141.076	108.153	232.401	158.599	160.226	237.027	188.71	406.779	137.964	174.274	128.012	61.6151	193.028	133.34	320.161	155.363	264.451
TcCLB.506131.1000120	40	34	6	0	0	0	0	0	0	0	394.615	319.136	137.964	68.2456	184.424	198.252	71.3334	0	217.802	0	104.599	0	139.517	245.431	137.964	272.191	280.005	117.576	185.279	137.964	254.882	73.8361	200.004	44.7256	260.61	237.956	163.496	203.523	213.306	432.607	142.641	109.586	128.769	154.557	125	187.85	308.94	92.8177	344.051
TcCLB.506187.20	40	34	6	0	0	0	0	0	0	0	356.74	235.173	105.307	119.048	218.706	211.516	67.6335	0	135.646	0	136.417	96.9223	280.005	295.852	165.139	221.422	223.24	135.646	190.433	192.161	239.818	111.024	265.415	98.9967	270.249	182.719	156.978	171.766	181.019	393.515	181.869	162.676	94.1793	161.041	193.028	306.914	279.024	200.882	261.568
TcCLB.506279.140	40	34	6	0	0	0	0	0	0	0	329.441	370.659	81.5149	92.1394	203.523	162.676	140.296	0	169.271	0	209.731	111.024	328.406	0	153.753	203.523	280.005	85.4481	162.676	145.787	216	113.194	183.571	148.957	325.306	163.496	217.802	214.203	213.306	425.819	187.85	113.194	109.586	230.559	156.17	224.15	324.275	160.226	335.676
TcCLB.506309.60	40	34	6	0	0	0	0	0	0	0	348.263	300.864	121.269	112.469	285.913	260.61	90.7877	223.24	198.252	0	119.787	128.769	199.128	225.975	202.642	272.191	200.004	145.787	220.516	121.269	256.786	134.876	243.555	148.957	270.249	210.623	217.802	237.027	200.882	432.607	137.19	137.19	139.517	180.171	149.752	230.559	275.113	148.162	36.4829
TcCLB.506951.80	40	34	6	0	0	0	0	0	0	0	394.615	275.113	124.251	103.894	189.571	134.876	86.7729	0	211.516	0	167.614	82.8191	265.415	272.191	225.062	251.087	280.005	151.348	125.751	166.788	241.684	119.048	136.417	32.5762	283.939	202.642	165.963	237.027	182.719	432.607	108.869	128.769	38.4908	54.0759	186.991	238.886	255.834	165.963	70.7122
TcCLB.507145.60	40	34	6	0	0	0	0	0	0	0	339.855	350.376	141.858	103.189	249.197	201.761	89.4427	223.24	198.252	0	121.269	128.769	190.433	244.492	202.642	251.087	202.642	172.601	176.793	135.646	295.852	134.876	216	71.3334	259.652	204.406	177.636	237.027	200.882	311.987	244.492	147.369	156.978	180.171	145.787	280.005	303.884	135.646	36.4829
TcCLB.508305.40	40	34	6	0	0	0	0	0	0	0	335.676	359.936	121.269	187.85	247.312	216.901	163.496	151.348	222.331	0	150.55	130.287	325.306	178.48	210.623	131.81	280.005	0	204.406	133.34	286.902	125.751	186.991	88.1044	322.216	149.752	182.719	237.027	202.642	397.92	100.388	161.041	141.076	108.153	141.858	291.863	263.489	240.75	231.479
TcCLB.508753.20	40	34	6	0	0	0	0	0	0	0	329.441	307.927	94.1793	119.048	285.913	177.636	147.369	98.3036	149.752	0	109.586	51.2647	280.005	330.477	225.062	272.191	234.248	164.317	158.599	113.194	227.805	119.048	204.406	92.8177	259.652	146.577	217.802	174.274	147.369	410.118	125.751	142.641	125.751	54.0759	235.173	302.876	307.927	207.063	0
TcCLB.508853.20	40	34	6	0	0	0	0	0	0	250.142	367.431	322.216	103.189	159.412	195.634	193.028	224.15	214.203	222.331	0	131.048	134.107	308.94	71.3334	225.062	272.191	282.954	0	185.279	130.287	200.882	134.876	216	124.251	226.89	179.325	215.101	206.176	196.506	374.977	141.858	110.304	82.8191	88.7727	196.506	256.786	241.684	129.527	51.2647
TcCLB.508873.60	40	34	6	0	0	0	0	0	0	272.191	368.506	331.515	77.0048	123.503	249.197	272.191	178.48	66.4149	171.766	0	103.894	83.4738	296.852	260.61	177.636	272.191	280.005	121.269	174.274	113.194	295.852	113.194	225.062	117.576	275.113	165.963	217.802	208.84	188.71	432.607	184.424	113.194	134.107	211.516	160.226	141.858	305.903	175.952	0
TcCLB.508977.100010	40	34	6	0	0	0	0	0	0	0	394.615	327.371	106.016	108.153	216	192.161	93.4977	0	151.348	0	102.486	74.4663	263.489	276.089	234.248	166.788	282.954	117.576	222.331	132.575	280.005	116.841	216	134.876	263.489	272.191	180.171	217.802	182.719	432.607	175.112	134.107	125.751	186.991	190.433	247.312	330.477	139.517	109.586
TcCLB.509217.40	40	34	6	0	0	0	0	0	0	0	391.319	335.676	113.194	92.8177	167.614	163.496	115.378	0	141.858	0	122.012	104.599	236.099	249.197	175.952	209.731	282.954	137.19	154.557	127.257	262.528	120.527	213.306	96.9223	277.066	193.895	190.433	237.027	227.805	432.607	144.211	111.746	92.8177	184.424	180.171	236.099	314.024	119.787	120.527
TcCLB.509251.20	40	34	6	0	0	0	0	0	0	0	367.431	363.142	98.9967	62.8038	216	205.291	131.81	0	193.028	0	125	73.8361	241.684	324.275	210.623	213.306	280.005	159.412	162.676	149.752	286.902	116.841	153.753	116.109	283.939	163.496	180.171	225.975	206.176	432.607	98.9967	128.769	85.4481	64	217.802	285.913	328.406	161.858	84.1302
TcCLB.509251.80	40	34	6	0	0	0	0	0	0	0	362.073	363.142	98.9967	62.8038	216	205.291	131.81	0	175.952	0	125	96.9223	272.191	279.024	210.623	236.099	280.005	149.752	186.991	160.226	237.027	116.841	152.148	116.109	297.853	163.496	180.171	187.85	202.642	432.607	104.599	128.769	151.348	171.766	217.802	233.324	292.859	145.787	70.0928
TcCLB.509419.40	40	34	6	0	0	0	0	0	0	0	386.938	288.883	121.269	117.576	285.913	193.028	90.7877	223.24	198.252	0	119.787	128.769	199.128	225.975	225.062	272.191	200.004	145.787	220.516	121.269	239.818	134.876	216	113.92	270.249	210.623	215.101	217.802	200.882	432.607	137.19	137.19	148.957	180.171	147.369	315.044	275.113	148.162	48.504
TcCLB.509699.220	40	34	6	0	0	0	0	0	0	0	394.615	318.111	118.311	94.8626	165.139	234.248	53.5097	0	213.306	0	186.991	128.769	241.684	237.956	180.171	272.191	253.931	103.894	152.95	158.599	206.176	111.024	211.516	58.6767	0	182.719	217.802	207.063	0	432.607	151.348	110.304	88.7727	122.757	172.601	229.64	261.568	170.933	145.787
TcCLB.509699.40	40	34	6	0	0	0	0	0	0	0	394.615	384.754	74.4663	125.751	287.892	217.802	111.746	31.1496	145.787	0	104.599	80.8653	236.099	264.451	161.858	272.191	280.005	0	210.623	154.557	272.191	130.287	227.805	31.6228	265.415	191.297	141.076	217.802	227.805	359.936	119.787	110.304	128.012	219.61	210.623	209.731	281.97	163.496	185.279
TcCLB.509897.1000160	40	34	6	0	0	0	0	0	0	0	389.127	304.893	98.9967	62.8038	216	205.291	96.9223	0	193.028	0	116.841	27.905	241.684	324.275	210.623	213.306	300.864	126.503	146.577	145.787	286.902	116.841	148.957	116.109	283.939	134.876	158.599	225.975	206.176	432.607	177.636	165.963	151.348	140.296	217.802	250.142	297.853	183.571	54.0759
TcCLB.509897.140	40	34	6	0	0	0	0	0	0	0	338.809	363.142	98.9967	74.4663	218.706	160.226	104.599	0	171.766	0	98.9967	103.894	241.684	324.275	210.623	213.306	282.954	126.503	146.577	160.226	286.902	116.841	213.306	108.153	291.863	128.012	180.171	225.975	202.642	432.607	155.363	150.55	151.348	99.6914	217.802	255.834	297.853	166.788	92.8177
TcCLB.509897.270	40	34	6	0	0	0	0	0	0	0	394.615	363.142	98.9967	83.4738	216	185.279	165.963	0	171.766	0	111.746	108.869	272.191	240.75	210.623	179.325	280.005	100.388	186.991	161.858	295.852	103.894	148.957	116.109	310.97	139.517	158.599	225.975	202.642	364.213	214.203	136.417	173.437	79.5715	217.802	285.913	268.312	132.575	46.8722
TcCLB.509899.40	40	34	6	0	0	0	0	0	0	0	394.615	363.142	108.869	111.024	216	205.291	154.557	0	175.952	0	90.1144	86.1097	266.379	315.044	210.623	179.325	280.005	159.412	126.503	131.048	286.902	116.841	221.422	116.109	283.939	162.676	180.171	225.975	202.642	432.607	193.028	165.963	142.641	57.5148	217.802	245.431	298.856	111.024	166.788
TcCLB.510207.30	40	34	6	0	0	0	0	0	0	0	327.371	300.864	121.269	117.576	287.892	193.028	156.978	223.24	198.252	0	119.787	128.769	199.128	225.975	202.642	272.191	200.004	145.787	209.731	140.296	239.818	134.876	216	148.957	270.249	210.623	217.802	237.027	162.676	432.607	137.19	137.19	148.957	180.171	150.55	252.982	275.113	148.162	36.4829
TcCLB.510979.40	40	34	6	0	0	0	0	0	0	0	327.371	298.856	86.1097	109.586	224.15	287.892	100.388	207.951	195.634	0	72.5812	123.503	190.433	244.492	234.248	272.191	185.279	151.348	158.599	163.496	250.142	134.876	243.555	100.388	289.875	264.451	217.802	206.176	165.139	374.977	116.841	147.369	40.5343	211.516	165.139	300.864	328.406	138.74	0
TcCLB.511255.270	40	34	6	0	0	0	0	0	0	0	364.213	298.856	92.1394	104.599	207.063	230.559	138.74	0	171.766	0	133.34	125	288.883	289.875	225.062	272.191	280.005	141.858	175.112	99.6914	218.706	119.048	237.027	116.109	285.913	128.769	186.134	217.802	227.805	321.188	117.576	100.388	139.517	44.7256	169.271	247.312	255.834	240.75	186.991
TcCLB.511399.24	40	34	6	0	0	0	0	0	0	0	394.615	331.515	157.788	93.4977	223.24	129.527	140.296	0	175.952	0	85.4481	116.841	272.191	297.853	210.623	203.523	280.005	153.753	222.331	139.517	295.852	116.841	237.027	98.9967	249.197	166.788	182.719	237.027	182.719	432.607	135.646	165.963	151.348	58.6767	217.802	255.834	330.477	139.517	109.586
TcCLB.511643.40	40	34	6	0	0	0	0	0	0	0	302.876	141.076	0	172.601	243.555	69.4752	206.176	72.5812	178.48	0	120.527	73.2078	298.856	269.28	225.062	213.306	280.005	164.317	164.317	181.019	209.731	134.876	243.555	114.648	299.859	182.719	168.442	211.516	206.176	432.607	63.4009	137.19	82.8191	75.732	116.109	242.619	268.312	164.317	134.876
TcCLB.511923.30	40	34	6	0	0	0	0	0	0	0	391.319	363.142	98.9967	93.4977	218.706	183.571	127.257	0	193.028	0	100.388	61.6151	234.248	315.044	210.623	213.306	300.864	131.81	146.577	140.296	295.852	103.894	148.957	134.876	268.312	210.623	215.101	237.027	202.642	432.607	202.642	121.269	158.599	147.369	217.802	237.956	268.312	136.417	244.492
TcCLB.504081.80	40	33	7	0	0	0	0	0	0	0	394.615	347.209	70.0928	179.325	231.479	141.858	116.841	105.307	152.148	0	164.317	99.6914	193.028	241.684	225.062	272.191	253.931	101.086	126.503	125	237.027	134.876	237.027	113.194	329.441	86.1097	217.802	208.84	202.642	370.659	216	90.7877	84.7883	216	235.173	280.005	295.852	151.348	0
TcCLB.506335.100020	40	33	7	0	0	0	0	0	0	0	286.902	291.863	133.34	106.727	236.099	163.496	165.963	259.652	155.363	0	143.425	125.751	315.044	332.554	164.317	221.422	280.005	96.2341	219.61	118.311	225.062	119.048	145.787	41.0507	155.363	202.642	216.901	237.027	181.019	432.607	112.469	142.641	101.785	43.6649	194.764	308.94	238.886	35.4924	194.764
TcCLB.506459.230	40	33	7	0	0	0	0	0	0	272.191	391.319	306.914	164.317	161.041	213.306	260.61	104.599	156.978	142.641	0	136.417	166.788	291.863	232.401	225.062	272.191	280.005	204.406	174.274	130.287	295.852	130.287	170.101	100.388	268.312	142.641	156.17	237.027	200.882	301.869	211.516	125.751	195.634	185.279	208.84	353.553	226.89	240.75	0
TcCLB.506909.100	40	33	7	0	0	0	0	0	0	0	356.74	347.209	135.646	80.2176	184.424	185.279	103.894	0	148.162	0	156.978	104.599	315.044	51.2647	225.062	221.422	253.931	86.7729	184.424	106.727	250.142	114.648	252.982	148.957	322.216	140.296	217.802	237.027	165.963	432.607	217.802	156.978	78.2847	164.317	186.991	259.652	290.869	127.257	201.761
TcCLB.507069.40	40	33	7	0	0	0	0	0	0	0	315.044	376.06	133.34	133.34	186.991	216.901	195.634	217.802	198.252	0	59.8463	0	288.883	265.415	152.148	272.191	280.005	0	175.112	151.348	286.902	120.527	227.805	134.876	257.74	180.171	216.901	237.027	196.506	432.607	193.028	116.841	101.785	109.586	137.964	207.063	318.111	0	303.884
TcCLB.508047.60	40	33	7	0	0	0	0	0	0	0	311.987	294.853	108.153	174.274	272.191	190.433	216	225.062	193.895	0	193.028	198.252	280.005	277.066	153.753	209.731	282.954	58.6767	162.676	115.378	278.045	130.287	180.171	50.7085	274.138	191.297	149.752	237.027	173.437	397.92	263.489	0	61.6151	111.024	208.84	265.415	252.034	166.788	354.615
TcCLB.508219.20	40	33	7	0	0	0	0	0	0	0	394.615	370.659	90.1144	103.189	218.706	193.895	112.469	0	176.793	0	111.746	86.1097	214.203	288.883	225.062	183.571	277.066	125.751	207.063	130.287	250.142	119.048	217.802	117.576	291.863	94.1793	215.101	225.975	227.805	425.819	165.139	80.8653	106.016	60.434	178.48	234.248	269.28	133.34	165.963
TcCLB.510021.180	40	33	7	0	0	0	0	0	0	184.424	366.357	384.754	157.788	128.769	194.764	260.61	155.363	230.559	172.601	0	136.417	119.787	226.89	227.805	225.062	272.191	282.954	135.646	210.623	104.599	213.306	120.527	205.291	116.109	262.528	152.148	217.802	237.027	160.226	359.936	211.516	147.369	190.433	185.279	186.991	353.553	278.045	230.559	0
TcCLB.510557.10	40	33	7	0	0	0	0	0	0	0	394.615	384.754	81.5149	127.257	207.063	234.248	79.5715	0	207.063	0	106.727	100.388	173.437	220.516	165.139	272.191	233.324	218.706	204.406	137.19	295.852	97.6121	141.858	90.7877	291.863	168.442	146.577	196.506	227.805	331.515	120.527	165.963	89.4427	207.951	217.802	257.74	185.279	146.577	167.614
TcCLB.510713.90	40	33	7	0	0	0	0	0	0	0	289.875	328.406	137.19	106.727	203.523	150.55	81.5149	0	171.766	0	92.8177	58.0948	216.901	68.2456	191.297	272.191	280.005	156.978	169.271	94.8626	281.97	130.287	178.48	134.876	265.415	137.964	217.802	207.063	170.933	432.607	128.012	111.746	105.307	126.503	186.991	236.099	274.138	212.41	165.139
TcCLB.511183.230	40	33	7	0	0	0	0	0	0	0	394.615	289.875	98.3036	109.586	152.148	193.895	182.719	91.4627	123.503	0	115.378	74.4663	346.155	264.451	103.189	183.571	280.005	121.269	135.646	163.496	272.191	122.012	181.019	65.2037	283.939	179.325	217.802	183.571	159.412	432.607	110.304	128.769	197.378	107.439	161.041	225.062	324.275	179.325	0
TcCLB.511183.60	40	33	7	0	0	0	0	0	0	0	359.936	309.955	101.785	101.785	134.876	193.895	182.719	91.4627	123.503	0	94.8626	74.4663	325.306	223.24	132.575	183.571	280.005	121.269	135.646	144.211	272.191	122.012	198.252	75.732	303.884	158.599	217.802	183.571	159.412	432.607	110.304	128.769	197.378	101.086	161.041	225.062	328.406	142.641	0
TcCLB.403739.20001	40	31	9	0	0	0	0	0	0	0	356.74	289.875	63.4009	154.557	242.619	181.019	237.027	156.978	222.331	0	141.858	128.012	304.893	301.869	225.062	272.191	256.786	234.248	161.041	144.211	225.062	134.876	204.406	93.4977	260.61	220.516	217.802	196.506	208.84	432.607	138.74	142.641	122.012	165.963	181.869	302.876	199.128	0	28.8199
TcCLB.508103.30	40	30	10	0	0	0	0	0	0	223.24	386.938	334.634	129.527	166.788	233.324	187.85	82.8191	170.101	133.34	0	160.226	131.048	218.706	346.155	225.062	272.191	280.005	150.55	156.978	133.34	241.684	134.876	217.802	111.746	243.555	218.706	167.614	237.027	143.425	328.406	157.788	127.257	69.4752	181.869	185.279	332.554	257.74	159.412	0
TcCLB.477471.20001	40	29	11	0	0	0	0	0	0	61.0236	386.938	324.275	109.586	414.584	255.834	165.963	303.884	221.422	180.171	52.9455	91.4627	77.6439	260.61	156.17	153.753	196.506	209.731	116.841	269.28	182.719	196.506	355.677	88.7727	0	177.636	0	123.503	198.252	525.257	248.254	223.24	133.34	54.6442	264.451	166.788	378.227	293.855	170.933	376.06
TcCLB.505993.30	40	28	12	0	0	0	0	0	0	0	368.506	309.955	44.1942	704.836	207.063	108.153	426.948	0	169.271	174.274	108.153	126.503	241.684	308.94	115.378	158.599	545.965	0	174.274	134.876	203.523	0	193.895	0	263.489	238.886	165.139	214.203	160.226	300.864	198.252	187.85	0	165.963	179.325	268.312	185.279	269.28	305.903
TcCLB.507555.50	40	28	12	0	0	0	0	0	0	0	368.506	309.955	44.1942	704.836	207.063	108.153	426.948	0	169.271	174.274	108.153	126.503	241.684	308.94	115.378	158.599	545.965	0	174.274	134.876	203.523	0	193.895	0	263.489	238.886	165.139	214.203	160.226	300.864	198.252	187.85	0	165.963	179.325	268.312	185.279	269.28	305.903
TcCLB.508171.10	40	28	12	0	0	0	0	0	0	0	234.248	280.005	94.1793	745.26	205.291	168.442	488.188	0	122.012	199.128	147.369	71.3334	277.066	265.415	103.894	158.599	585.662	0	167.614	147.369	181.019	0	151.348	0	164.317	238.886	129.527	237.027	144.999	300.864	163.496	212.41	0	144.211	223.24	230.559	162.676	278.045	285.913
TcCLB.508399.100040	40	28	12	0	0	0	0	0	0	0	356.74	285.913	87.4378	756.166	137.19	193.028	541.068	0	72.5812	216.901	119.787	95.5475	221.422	373.896	115.378	141.076	454.34	0	139.517	143.425	195.634	0	169.271	0	249.197	123.503	156.17	141.858	153.753	246.371	146.577	187.85	0	148.957	218.706	235.173	210.623	278.045	412.349
TcCLB.508515.150	40	28	12	0	0	0	0	0	0	0	386.938	304.893	116.841	583.154	175.952	168.442	500.047	0	103.189	230.559	168.442	119.787	243.555	271.22	122.012	158.599	543.515	0	167.614	154.557	195.634	0	172.601	0	221.422	57.5148	134.876	214.203	200.882	266.379	193.028	212.41	0	165.963	139.517	211.516	193.895	170.933	306.914
TcCLB.508963.30	40	28	12	0	0	0	0	0	0	0	367.431	318.111	70.0928	381.486	231.479	162.676	501.238	0	137.19	267.345	109.586	98.3036	296.852	298.856	102.486	158.599	525.257	0	167.614	152.95	186.991	0	190.433	0	228.722	278.045	182.719	214.203	185.279	300.864	159.412	187.85	0	165.963	179.325	272.191	195.634	234.248	397.92
TcCLB.510125.20	40	28	12	0	0	0	0	0	0	0	294.853	364.213	90.7877	704.836	205.291	168.442	324.275	0	111.024	254.882	109.586	84.7883	277.066	245.431	103.894	158.599	496.479	0	161.041	147.369	199.128	0	142.641	0	206.176	210.623	165.139	237.027	150.55	300.864	196.506	185.279	0	180.171	265.415	252.982	206.176	161.858	478.77
TcCLB.510155.220	40	28	12	0	0	0	0	0	0	0	394.615	355.677	125.751	653.42	159.412	163.496	520.423	0	125	225.975	119.787	82.1661	269.28	316.065	116.841	148.162	84.1302	0	167.614	127.257	203.523	0	151.348	0	195.634	186.134	118.311	170.933	53.5097	243.555	236.099	187.85	0	171.766	201.761	235.173	215.101	237.956	428.078
TcCLB.510643.40	40	28	12	0	0	0	0	0	0	0	355.677	332.554	66.4149	446.292	191.297	156.17	446.292	0	104.599	184.424	124.251	103.894	286.902	252.982	116.841	158.599	595.731	0	184.424	172.601	222.331	0	198.252	0	252.034	275.113	182.719	204.406	133.34	232.401	193.028	168.442	0	179.325	116.109	251.087	166.788	259.652	317.088
TcCLB.511833.10	40	28	12	0	0	0	0	0	0	0	356.74	226.89	70.0928	743.9	205.291	179.325	488.188	0	111.024	170.933	112.469	84.7883	277.066	262.528	103.894	158.599	585.662	0	128.769	147.369	181.019	0	176.793	0	200.882	318.111	226.89	216	144.999	288.883	236.099	215.101	0	140.296	261.568	290.869	186.991	171.766	248.254
TcCLB.504115.10	40	27	13	0	0	0	0	0	0	0	391.319	269.28	124.251	485.828	174.274	875.249	298.856	0	184.424	193.895	156.978	106.016	221.422	259.652	116.841	136.417	578.148	0	146.577	172.601	172.601	0	198.252	0	263.489	291.863	151.348	214.203	227.805	266.379	211.516	215.101	0	165.963	215.101	251.087	181.019	253.931	447.439
TcCLB.506083.20	40	27	13	0	0	0	0	0	0	0	355.677	343	70.0928	0	231.479	175.112	373.896	0	104.599	227.805	109.586	102.486	286.902	293.855	103.894	158.599	522.838	0	167.614	139.517	234.248	108.153	169.271	0	263.489	235.173	226.89	207.063	160.226	266.379	198.252	215.101	0	149.752	135.646	176.793	146.577	190.433	400.129
TcCLB.506341.50	40	27	13	0	0	0	0	0	0	0	359.936	328.406	86.1097	475.254	237.956	790.586	371.737	0	146.577	238.886	170.101	130.287	233.324	288.883	116.841	158.599	536.187	0	161.041	140.296	186.991	0	207.951	0	181.869	263.489	141.858	214.203	200.882	300.864	211.516	212.41	0	141.076	221.422	255.834	178.48	148.957	339.855
TcCLB.508627.40	40	27	13	0	0	0	0	0	0	0	287.892	353.553	111.746	0	231.479	168.442	514.402	0	104.599	234.248	167.614	101.086	256.786	250.142	111.746	158.599	450.885	0	176.793	161.858	186.991	75.0983	207.951	0	263.489	292.859	132.575	189.571	175.112	300.864	141.858	215.101	0	180.171	207.063	253.931	187.85	237.027	317.088
TcCLB.511861.50	40	27	13	0	0	0	0	0	0	0	316.065	293.855	77.0048	468.248	237.956	810.083	284.926	0	137.19	204.406	186.991	93.4977	308.94	284.926	115.378	170.101	446.292	0	176.793	155.363	177.636	0	170.101	0	263.489	229.64	226.89	217.802	160.226	300.864	151.348	171.766	0	148.162	150.55	206.176	193.028	240.75	291.863
TcCLB.506537.200	40	26	14	0	0	0	0	0	0	0	350.376	319.136	124.251	0	185.279	121.269	422.438	0	104.599	199.128	165.139	104.599	239.818	311.987	106.727	158.599	542.291	0	167.614	163.496	200.004	108.153	207.951	0	215.101	237.956	182.719	214.203	162.676	266.379	154.557	215.101	0	160.226	200.004	265.415	171.766	149.752	319.136
TcCLB.506683.110	40	26	14	0	0	0	0	0	0	0	337.763	268.312	0	315.044	237.956	796.141	391.319	0	152.148	150.55	167.614	78.9272	249.197	306.914	115.378	170.101	500.047	0	184.424	154.557	198.252	108.153	172.601	0	228.722	265.415	186.991	237.027	181.019	266.379	207.951	212.41	0	168.442	246.371	245.431	187.85	227.805	394.615
TcCLB.509931.20	40	26	14	0	0	0	0	0	0	0	394.615	299.859	0	202.642	237.956	785.045	395.716	0	144.999	225.062	157.788	97.6121	286.902	294.853	115.378	158.599	575.651	0	161.041	121.269	222.331	108.153	193.895	0	252.034	255.834	165.139	188.71	175.112	314.024	181.019	212.41	0	165.963	186.991	268.312	168.442	234.248	403.449
TcCLB.511587.90	40	26	14	0	0	0	0	0	0	0	384.754	384.754	0	331.515	199.128	839.624	361.004	0	137.19	181.869	170.101	61.6151	286.902	338.809	108.153	158.599	656.025	0	161.041	137.964	165.963	108.153	207.951	0	228.722	264.451	131.81	213.306	193.895	288.883	187.85	215.101	0	157.788	186.991	226.89	193.028	230.559	407.891
TcCLB.506813.220	39	36	3	0	0	0	0	0	0	0	394.615	341.951	146.577	112.469	184.424	201.761	121.269	0	109.586	0	137.964	86.1097	236.099	116.109	154.557	251.087	290.869	0	185.279	145.787	199.128	108.869	237.027	111.746	238.886	140.296	180.171	237.027	181.019	397.92	156.17	116.841	54.0759	184.424	208.84	255.834	236.099	165.963	150.55
TcCLB.506001.40	39	35	4	0	0	0	0	0	0	0	368.506	345.102	75.0983	113.92	158.599	194.764	122.757	0	159.412	0	77.0048	0	211.516	162.676	225.062	272.191	261.568	158.599	183.571	125	196.506	134.876	181.869	67.6335	313.005	153.753	215.101	214.203	208.84	406.779	161.041	170.101	104.599	177.636	148.162	206.176	225.062	150.55	186.134
TcCLB.506067.1000230	39	35	4	0	0	0	0	0	0	0	386.938	363.142	87.4378	81.5149	195.634	176.793	0	66.4149	246.371	0	104.599	72.5812	168.442	136.417	109.586	272.191	280.005	0	175.112	125.751	252.982	125.751	186.991	49.0521	262.528	70.7122	168.442	237.027	170.933	432.607	176.793	154.557	166.788	174.274	148.162	327.371	330.477	181.869	77.0048
TcCLB.511797.110	39	35	4	0	0	0	0	0	0	0	394.615	358.87	161.041	146.577	245.431	156.978	117.576	139.517	193.895	0	147.369	119.787	288.883	141.076	191.297	209.731	243.555	0	148.162	82.8191	256.786	119.048	185.279	96.9223	317.088	222.331	182.719	225.975	206.176	425.819	93.4977	129.527	103.189	184.424	176.793	334.634	293.855	225.062	0
TcCLB.511797.240	39	35	4	0	0	0	0	0	0	0	394.615	298.856	140.296	152.95	245.431	177.636	117.576	139.517	193.895	0	147.369	121.269	295.852	141.076	191.297	209.731	243.555	0	148.162	79.5715	260.61	134.876	185.279	96.9223	325.306	205.291	142.641	237.027	206.176	432.607	93.4977	129.527	103.189	184.424	176.793	334.634	264.451	240.75	0
TcCLB.504007.20	39	34	5	0	0	0	0	0	0	0	394.615	376.06	108.869	125.751	203.523	144.999	113.194	0	246.371	0	155.363	0	250.142	73.2078	144.211	272.191	280.005	165.963	229.64	121.269	262.528	130.287	219.61	54.6442	252.034	136.417	217.802	237.027	206.176	432.607	149.752	116.841	118.311	113.194	185.279	243.555	330.477	196.506	85.4481
TcCLB.506139.170	39	34	5	0	0	0	0	0	0	0	394.615	305.903	131.048	144.211	206.176	300.864	138.74	125.751	199.128	0	132.575	80.2176	210.623	191.297	191.297	272.191	282.954	0	177.636	119.048	254.882	134.876	0	119.048	322.216	193.895	220.516	237.027	200.882	432.607	141.076	131.81	82.8191	89.4427	157.788	310.97	318.111	142.641	279.024
TcCLB.506245.190	39	34	5	0	0	0	0	0	0	0	362.073	370.659	108.869	125.751	203.523	144.999	113.194	0	195.634	0	155.363	0	250.142	73.2078	154.557	272.191	280.005	165.963	229.64	121.269	206.176	130.287	158.599	54.6442	283.939	198.252	217.802	203.523	206.176	450.885	149.752	116.841	118.311	113.194	185.279	252.982	330.477	191.297	85.4481
TcCLB.506955.270	39	34	5	0	0	0	0	0	0	0	394.615	195.634	133.34	144.211	186.134	143.425	61.6151	0	172.601	0	125	73.8361	238.886	267.345	165.139	141.076	280.005	0	195.634	114.648	254.882	134.876	187.85	98.9967	279.024	128.769	217.802	225.975	187.85	425.819	161.041	111.024	84.1302	161.041	193.028	306.914	279.024	231.479	311.987
TcCLB.508759.20	39	34	5	0	0	0	0	0	0	0	394.615	252.034	133.34	72.5812	197.378	144.999	112.469	0	261.568	0	132.575	0	283.939	42.6128	154.557	272.191	253.931	122.012	177.636	133.34	281.97	120.527	148.162	105.307	325.306	140.296	216.901	197.378	196.506	397.92	263.489	170.101	88.7727	78.2847	155.363	256.786	226.89	170.933	287.892
TcCLB.508871.170	39	34	5	0	0	0	0	0	0	0	394.615	254.882	75.0983	63.4009	205.291	152.95	113.194	0	92.8177	0	0	142.641	328.406	241.684	225.062	236.099	282.954	119.048	207.951	125	180.171	101.086	116.109	75.0983	255.834	236.099	217.802	207.063	199.128	359.936	131.048	146.577	149.752	71.3334	150.55	198.252	295.852	152.148	90.1144
TcCLB.509115.20	39	34	5	0	0	0	0	0	0	0	297.853	217.802	127.257	179.325	183.571	205.291	176.793	211.516	193.895	0	171.766	166.788	325.306	279.024	204.406	272.191	202.642	0	156.17	166.788	264.451	116.841	213.306	108.153	293.855	234.248	168.442	192.161	202.642	432.607	136.417	137.19	138.74	75.0983	157.788	242.619	292.859	153.753	0
TcCLB.509419.100090	39	34	5	0	0	0	0	0	0	0	348.263	289.875	121.269	117.576	285.913	193.028	90.7877	223.24	191.297	0	119.787	128.769	199.128	217.802	225.062	272.191	200.004	0	209.731	140.296	239.818	134.876	216	113.92	270.249	210.623	217.802	217.802	200.882	432.607	137.19	137.19	148.957	180.171	180.171	252.982	275.113	148.162	36.4829
TcCLB.509545.40	39	34	5	0	0	0	0	0	0	0	345.102	384.754	93.4977	119.048	166.788	145.787	154.557	219.61	217.802	0	139.517	206.176	229.64	56.3607	139.517	272.191	282.954	175.952	185.279	169.271	199.128	0	158.599	128.769	220.516	198.252	215.101	181.019	157.788	432.607	202.642	116.841	91.4627	101.785	202.642	204.406	303.884	172.601	0
TcCLB.509897.110	39	34	5	0	0	0	0	0	0	0	367.431	363.142	98.9967	78.9272	220.516	193.028	128.769	0	175.952	0	110.304	84.1302	241.684	304.893	210.623	184.424	300.864	0	222.331	145.787	286.902	116.841	148.162	97.6121	310.97	182.719	215.101	196.506	202.642	377.143	202.642	150.55	158.599	153.753	217.802	263.489	307.927	199.128	68.2456
TcCLB.509897.20	39	34	5	0	0	0	0	0	0	0	391.319	363.142	98.9967	82.8191	216	179.325	111.746	0	187.85	0	100.388	123.503	263.489	304.893	210.623	184.424	300.864	0	161.041	160.226	286.902	116.841	209.731	134.876	279.024	147.369	215.101	225.975	202.642	432.607	120.527	161.041	146.577	184.424	217.802	263.489	268.312	130.287	232.401
TcCLB.509897.200	39	34	5	0	0	0	0	0	0	0	391.319	363.142	113.194	113.92	218.706	201.761	117.576	0	187.85	0	77.0048	82.1661	263.489	304.893	210.623	184.424	280.005	0	146.577	166.788	210.623	116.841	200.004	111.024	274.138	267.345	215.101	192.161	202.642	432.607	176.793	136.417	151.348	78.2847	217.802	263.489	267.345	68.2456	70.0928
TcCLB.510361.10	39	34	5	0	0	0	0	0	0	0	308.94	331.515	131.81	91.4627	245.431	131.048	99.6914	0	193.028	0	116.841	156.978	323.245	248.254	130.287	183.571	277.066	0	177.636	110.304	250.142	134.876	257.74	119.048	279.024	87.4378	217.802	181.019	199.128	432.607	145.787	80.8653	139.517	75.0983	145.787	269.28	305.903	92.1394	63.4009
TcCLB.510371.90	39	34	5	0	0	0	0	0	0	0	394.615	395.716	155.363	102.486	207.063	188.71	119.787	0	187.85	0	122.012	80.8653	193.028	187.85	225.062	272.191	282.954	47.414	197.378	77.6439	295.852	134.876	177.636	92.8177	270.249	185.279	155.363	237.027	227.805	432.607	128.769	170.101	46.3324	211.516	194.764	149.752	279.024	232.401	0
TcCLB.510497.40	39	34	5	0	0	0	0	0	0	0	394.615	318.111	146.577	112.469	184.424	201.761	125.751	0	109.586	0	108.153	85.4481	236.099	98.9967	210.623	272.191	282.954	0	169.271	148.162	221.422	130.287	207.063	56.3607	295.852	187.85	180.171	217.802	181.019	432.607	159.412	113.92	54.0759	136.417	174.274	260.61	231.479	216	158.599
TcCLB.510709.70	39	34	5	0	0	0	0	0	0	0	352.493	254.882	127.257	105.307	207.063	193.895	142.641	0	211.516	0	85.4481	0	177.636	211.516	202.642	272.191	282.954	148.162	185.279	170.933	281.97	0	186.991	134.876	275.113	113.92	163.496	208.84	200.882	432.607	114.648	170.101	78.2847	125.751	186.991	260.61	305.903	249.197	141.076
TcCLB.511255.350	39	34	5	0	0	0	0	0	0	0	394.615	321.188	164.317	101.086	218.706	167.614	119.048	0	155.363	0	90.1144	0	263.489	178.48	234.248	272.191	257.74	112.469	222.331	161.858	196.506	134.876	183.571	148.957	307.927	216.901	217.802	225.975	196.506	432.607	99.6914	100.388	124.251	54.6442	247.312	188.71	252.034	118.311	189.571
TcCLB.511607.60	39	34	5	0	0	0	0	0	0	0	347.209	384.754	146.577	130.287	234.248	120.527	186.991	270.249	144.999	0	141.076	131.048	269.28	263.489	234.248	209.731	282.954	119.787	184.424	185.279	226.89	0	150.55	105.307	297.853	231.479	215.101	206.176	188.71	343	163.496	144.211	120.527	0	183.571	160.226	237.956	183.571	288.883
TcCLB.423309.20001	39	33	6	0	0	0	0	0	0	0	350.376	289.875	101.785	97.6121	197.378	266.379	169.271	86.7729	198.252	0	111.746	91.4627	274.138	268.312	175.952	236.099	282.954	0	155.363	141.858	268.312	66.4149	192.161	60.434	216.901	186.991	217.802	237.027	206.176	432.607	106.016	146.577	197.378	90.7877	119.048	217.802	324.275	207.063	0
TcCLB.505431.20001	39	33	6	0	0	0	0	0	0	0	374.977	310.97	89.4427	113.92	188.71	300.864	171.766	124.251	156.978	0	111.746	82.1661	346.155	252.982	175.952	226.89	280.005	0	170.933	141.858	241.684	88.7727	139.517	86.1097	231.479	152.148	217.802	229.64	213.306	432.607	102.486	146.577	180.171	79.5715	202.642	302.876	307.927	207.063	0
TcCLB.506173.70	39	33	6	0	0	0	0	0	0	0	394.615	370.659	164.317	99.6914	218.706	193.895	112.469	0	246.371	0	85.4481	0	156.978	232.401	173.437	183.571	280.005	92.1394	207.063	141.858	250.142	134.876	187.85	117.576	322.216	150.55	217.802	198.252	141.076	374.977	217.802	156.978	78.2847	164.317	186.991	259.652	290.869	121.269	186.134
TcCLB.507071.10	39	33	6	0	0	0	0	0	0	0	384.754	305.903	125.751	122.012	238.886	117.576	108.869	0	246.371	28.3612	122.012	91.4627	237.956	48.504	210.623	200.004	217.802	0	172.601	133.34	281.97	120.527	141.076	134.876	322.216	204.406	180.171	237.027	196.506	432.607	71.9564	131.81	47.414	58.6767	166.788	195.634	343	0	243.555
TcCLB.507071.190	39	33	6	0	0	0	0	0	0	0	367.431	316.065	133.34	72.5812	203.523	193.895	59.2605	0	215.101	0	124.251	38.4908	302.876	0	183.571	251.087	230.559	159.412	161.041	151.348	268.312	134.876	145.787	88.1044	201.761	177.636	217.802	237.027	181.019	432.607	98.3036	97.6121	141.076	0	108.869	220.516	293.855	92.1394	368.506
TcCLB.508125.80	39	33	6	0	0	0	0	0	0	0	328.406	300.864	121.269	117.576	287.892	193.028	90.7877	223.24	198.252	0	119.787	128.769	202.642	225.975	202.642	272.191	200.004	145.787	209.731	140.296	179.325	134.876	216	100.388	257.74	210.623	217.802	237.027	200.882	432.607	137.19	137.19	148.957	180.171	150.55	252.982	275.113	148.162	36.4829
TcCLB.508221.400	39	33	6	0	0	0	0	0	0	0	394.615	331.515	77.0048	179.325	199.128	181.019	116.841	118.311	193.895	0	164.317	99.6914	193.028	224.15	175.952	272.191	240.75	0	193.028	165.139	272.191	130.287	195.634	128.769	219.61	116.841	186.134	237.027	227.805	374.977	113.92	92.1394	108.153	200.004	152.95	257.74	279.024	141.858	0
TcCLB.508221.750	39	33	6	0	0	0	0	0	0	0	368.506	246.371	141.858	170.933	120.527	243.555	78.9272	0	193.028	0	118.311	0	229.64	281.97	225.062	272.191	282.954	181.019	166.788	135.646	272.191	134.876	252.982	98.9967	310.97	205.291	149.752	217.802	227.805	425.819	165.139	94.8626	131.81	75.0983	202.642	276.089	257.74	101.086	169.271
TcCLB.508873.390	39	33	6	0	0	0	0	0	0	0	394.615	384.754	115.378	96.2341	194.764	234.248	125.751	0	157.788	0	125	123.503	272.191	343	161.858	272.191	282.954	113.92	147.369	125	209.731	134.876	198.252	98.3036	262.528	218.706	186.134	208.84	235.173	425.819	169.271	116.109	116.109	166.788	128.769	230.559	280.987	167.614	0
TcCLB.509685.40	39	33	6	0	0	0	0	0	0	0	324.275	278.045	146.577	83.4738	190.433	260.61	113.194	156.978	142.641	0	134.107	166.788	291.863	260.61	175.952	272.191	280.005	144.211	158.599	145.787	252.982	134.876	217.802	86.1097	237.027	130.287	217.802	169.271	206.176	357.805	119.787	138.74	169.271	66.4149	122.012	193.895	293.855	142.641	116.109
TcCLB.509753.100020	39	33	6	0	0	0	0	0	0	0	391.319	350.376	164.317	79.5715	144.999	149.752	113.92	152.148	217.802	0	129.527	81.5149	262.528	240.75	204.406	239.818	282.954	104.599	154.557	128.769	254.882	0	167.614	101.785	240.75	195.634	217.802	237.027	227.805	432.607	115.378	131.81	0	101.785	202.642	269.28	263.489	214.203	164.317
TcCLB.509753.90	39	33	6	0	0	0	0	0	0	0	359.936	319.136	164.317	165.139	243.555	170.101	123.503	190.433	198.252	0	98.3036	159.412	236.099	240.75	225.062	272.191	277.066	65.2037	154.557	125.751	252.982	0	143.425	101.785	272.191	161.858	217.802	237.027	227.805	432.607	193.028	110.304	85.4481	181.019	196.506	262.528	303.884	119.048	44.1942
TcCLB.510197.100030	39	33	6	0	0	0	0	0	0	0	321.188	292.859	0	84.7883	43.1378	152.95	147.369	98.3036	149.752	0	109.586	51.2647	280.005	330.477	225.062	236.099	234.248	164.317	158.599	119.048	227.805	98.9967	174.274	92.8177	257.74	165.963	217.802	174.274	147.369	410.118	206.176	142.641	125.751	54.0759	235.173	302.876	324.275	207.063	0
TcCLB.510269.100060	39	33	6	0	0	0	0	0	0	0	227.805	267.345	152.148	186.134	242.619	231.479	204.406	170.101	166.788	0	148.957	101.785	306.914	247.312	204.406	213.306	282.954	0	154.557	125.751	170.933	130.287	181.869	98.3036	213.306	204.406	217.802	225.975	213.306	337.763	106.727	146.577	125.751	125.751	166.788	229.64	278.045	202.642	0
TcCLB.510275.1000110	39	33	6	0	0	0	0	0	0	0	319.136	383.664	78.9272	186.134	216	230.559	131.81	156.17	193.895	0	116.841	128.012	325.306	247.312	204.406	213.306	282.954	0	154.557	166.788	170.933	130.287	181.869	98.3036	155.363	204.406	217.802	225.975	213.306	386.938	112.469	146.577	146.577	77.6439	166.788	304.893	278.045	225.062	0
TcCLB.511255.10	39	33	6	0	0	0	0	0	0	0	379.312	296.852	127.257	98.9967	207.063	228.722	123.503	0	193.028	0	130.287	0	257.74	220.516	225.062	226.89	222.331	159.412	170.933	98.9967	252.982	114.648	257.74	137.964	257.74	196.506	217.802	237.027	227.805	432.607	172.601	121.269	162.676	55.2144	193.028	221.422	279.024	161.858	244.492
TcCLB.511921.100	39	33	6	0	0	0	0	0	0	0	394.615	363.142	98.9967	62.8038	216	170.933	154.557	0	155.363	0	116.841	68.8595	263.489	240.75	210.623	179.325	280.005	126.503	162.676	166.788	286.902	116.841	138.74	134.876	332.554	176.793	180.171	225.975	206.176	432.607	176.793	127.257	142.641	71.3334	217.802	285.913	268.312	112.469	232.401
TcCLB.503601.10	39	32	7	0	0	0	0	0	0	0	394.615	384.754	86.1097	126.503	252.034	245.431	115.378	143.425	195.634	0	157.788	131.048	202.642	225.975	234.248	272.191	200.004	126.503	158.599	114.648	204.406	134.876	211.516	113.194	270.249	169.271	215.101	237.027	206.176	432.607	116.841	150.55	43.1378	135.646	216	241.684	308.94	137.964	0
TcCLB.503717.120	39	32	7	0	0	0	0	0	0	0	394.615	278.045	79.5715	124.251	169.271	129.527	157.788	68.2456	222.331	0	87.4378	82.1661	325.306	268.312	174.274	209.731	282.954	122.012	220.516	143.425	241.684	76.3675	178.48	86.1097	329.441	169.271	163.496	190.433	202.642	397.92	114.648	165.963	126.503	68.2456	194.764	295.852	295.852	144.211	0
TcCLB.503973.340	39	32	7	0	0	0	0	0	0	0	349.319	326.338	131.048	161.041	201.761	190.433	101.086	144.999	142.641	0	136.417	28.8199	291.863	271.22	225.062	272.191	280.005	186.134	174.274	130.287	234.248	114.648	189.571	107.439	243.555	156.17	156.17	237.027	200.882	304.893	211.516	125.751	195.634	185.279	208.84	353.553	278.045	240.75	0
TcCLB.506131.170	39	32	7	0	0	0	0	0	0	0	368.506	268.312	133.34	107.439	175.112	175.952	92.8177	0	125	0	88.1044	0	180.171	258.696	198.252	251.087	253.931	156.978	182.719	152.95	250.142	108.869	219.61	128.769	295.852	187.85	180.171	186.991	206.176	432.607	165.139	122.012	32.5762	191.297	208.84	166.788	245.431	200.004	199.128
TcCLB.506459.180	39	32	7	0	0	0	0	0	0	0	355.677	328.406	139.517	163.496	213.306	260.61	88.7727	126.503	142.641	0	131.81	166.788	265.415	271.22	225.062	272.191	242.619	204.406	174.274	116.109	234.248	130.287	189.571	100.388	240.75	156.17	149.752	211.516	200.882	301.869	211.516	125.751	195.634	185.279	208.84	317.088	278.045	240.75	0
TcCLB.506603.40	39	32	7	0	0	0	0	0	0	0	327.371	317.088	115.378	174.274	228.722	230.559	186.134	137.964	141.858	0	99.6914	137.964	263.489	47.414	225.062	272.191	219.61	184.424	146.577	90.1144	224.15	130.287	149.752	117.576	226.89	149.752	182.719	206.176	172.601	397.92	211.516	147.369	190.433	188.71	210.623	353.553	278.045	211.516	0
TcCLB.506615.10	39	32	7	0	0	0	0	0	0	0	391.319	347.209	143.425	201.761	253.931	260.61	142.641	153.753	142.641	0	105.307	73.8361	302.876	43.1378	184.424	272.191	245.431	208.84	164.317	135.646	224.15	116.109	153.753	137.964	268.312	152.148	175.952	207.063	208.84	425.819	145.787	147.369	190.433	141.076	170.933	321.188	278.045	223.24	0
TcCLB.506615.150	39	32	7	0	0	0	0	0	0	0	345.102	297.853	123.503	201.761	253.931	260.61	142.641	155.363	142.641	0	105.307	73.8361	302.876	40.0202	184.424	272.191	245.431	208.84	164.317	135.646	224.15	116.109	153.753	137.964	291.863	152.148	149.752	207.063	208.84	287.892	211.516	170.101	190.433	141.076	170.933	321.188	278.045	240.75	0
TcCLB.506751.90	39	32	7	0	0	0	0	0	0	0	333.594	289.875	113.194	216	208.84	275.113	132.575	243.555	146.577	0	131.81	133.34	252.982	291.863	225.062	236.099	219.61	140.296	174.274	161.858	206.176	116.109	141.076	111.746	295.852	128.769	173.437	225.975	208.84	425.819	211.516	125.751	190.433	185.279	208.84	281.97	242.619	240.75	0
TcCLB.506767.310	39	32	7	0	0	0	0	0	0	0	394.615	370.659	157.788	136.417	221.422	245.431	161.041	255.834	155.363	0	136.417	167.614	237.956	34.0239	225.062	272.191	282.954	159.412	197.378	45.2591	295.852	120.527	243.555	111.746	291.863	237.956	217.802	237.027	206.176	356.74	157.788	147.369	190.433	188.71	235.173	256.786	278.045	230.559	0
TcCLB.506955.1000170	39	32	7	0	0	0	0	0	0	0	394.615	268.312	73.2078	123.503	199.128	48.504	114.648	175.952	253.931	0	129.527	94.8626	208.84	275.113	210.623	272.191	233.324	128.012	187.85	114.648	254.882	86.7729	186.991	98.9967	227.805	128.769	217.802	109.586	120.527	432.607	171.766	174.274	82.1661	148.162	129.527	170.101	265.415	194.764	0
TcCLB.507953.100	39	32	7	0	0	0	0	0	0	0	347.209	319.136	125.751	198.252	223.24	275.113	152.148	219.61	155.363	0	98.3036	178.48	237.956	34.0239	225.062	272.191	282.954	214.203	183.571	152.95	291.863	130.287	193.895	111.746	267.345	168.442	217.802	206.176	160.226	315.044	157.788	147.369	161.041	188.71	210.623	274.138	278.045	225.975	0
TcCLB.507953.140	39	32	7	0	0	0	0	0	0	0	394.615	364.213	157.788	111.024	221.422	260.61	161.041	252.982	155.363	0	132.575	167.614	237.956	34.0239	225.062	272.191	282.954	208.84	197.378	170.933	295.852	134.876	225.062	117.576	250.142	270.249	156.978	206.176	206.176	425.819	211.516	147.369	190.433	188.71	210.623	274.138	278.045	230.559	0
TcCLB.508113.20	39	32	7	0	0	0	0	0	0	0	391.319	336.719	143.425	201.761	252.034	260.61	68.2456	144.999	142.641	0	81.5149	84.1302	302.876	43.1378	186.134	272.191	245.431	208.84	167.614	135.646	224.15	116.109	153.753	137.964	212.41	163.496	71.9564	207.063	213.306	397.92	145.787	147.369	190.433	141.076	170.933	297.853	278.045	223.24	0
TcCLB.508541.120	39	32	7	0	0	0	0	0	0	0	394.615	268.312	73.2078	146.577	179.325	96.2341	98.9967	199.128	178.48	0	133.34	108.153	265.415	225.975	234.248	236.099	240.75	159.412	220.516	114.648	254.882	134.876	227.805	148.957	210.623	141.858	217.802	225.975	152.95	432.607	206.176	170.101	89.4427	156.978	129.527	170.101	300.864	183.571	0
TcCLB.508871.10	39	32	7	0	0	0	0	0	0	0	336.719	319.136	127.257	161.041	213.306	223.24	101.086	144.999	142.641	0	136.417	169.271	291.863	271.22	225.062	272.191	280.005	204.406	166.788	130.287	234.248	130.287	189.571	117.576	291.863	156.17	178.48	206.176	200.882	255.834	188.71	125.751	195.634	185.279	208.84	353.553	278.045	245.431	0
TcCLB.508871.110	39	32	7	0	0	0	0	0	0	0	374.977	353.553	128.012	166.788	215.101	260.61	122.012	116.841	142.641	0	136.417	169.271	296.852	239.818	225.062	272.191	282.954	134.107	158.599	125	234.248	130.287	189.571	107.439	227.805	140.296	149.752	237.027	200.882	246.371	211.516	125.751	195.634	185.279	170.933	353.553	278.045	245.431	0
TcCLB.509979.320	39	32	7	0	0	0	0	0	0	0	336.719	314.024	116.841	45.2591	252.034	260.61	142.641	155.363	142.641	0	65.2037	49.6022	302.876	239.818	210.623	272.191	282.954	208.84	144.999	104.599	260.61	130.287	195.634	117.576	270.249	207.063	178.48	206.176	208.84	230.559	157.788	147.369	190.433	188.71	210.623	353.553	320.161	240.75	0
TcCLB.510033.30	39	32	7	0	0	0	0	0	0	0	394.615	309.955	143.425	201.761	180.171	260.61	142.641	144.999	142.641	0	105.307	77.6439	302.876	43.1378	184.424	272.191	245.431	208.84	167.614	135.646	224.15	116.109	171.766	137.964	268.312	152.148	178.48	207.063	208.84	356.74	211.516	147.369	190.433	141.076	170.933	297.853	278.045	223.24	0
TcCLB.510047.80	39	32	7	0	0	0	0	0	0	238.886	284.926	246.371	164.317	174.274	194.764	179.325	100.388	144.999	198.252	0	127.257	128.769	163.496	244.492	144.211	272.191	185.279	0	220.516	137.19	286.902	120.527	165.139	119.048	254.882	171.766	177.636	207.063	157.788	432.607	121.269	144.211	156.978	148.957	202.642	245.431	275.113	159.412	0
TcCLB.510163.60	39	32	7	0	0	0	0	0	0	0	291.863	384.754	157.788	195.634	237.956	228.722	141.076	181.869	144.211	0	109.586	176.793	241.684	243.555	210.623	209.731	245.431	159.412	140.296	104.599	216.901	130.287	198.252	117.576	226.89	149.752	161.858	182.719	213.306	323.245	211.516	147.369	190.433	185.279	210.623	313.005	278.045	225.062	0
TcCLB.510201.40	39	32	7	0	0	0	0	0	0	0	374.977	152.95	92.1394	150.55	238.886	220.516	186.991	182.719	193.895	0	141.858	176.793	306.914	163.496	175.952	183.571	282.954	116.841	155.363	141.858	254.882	113.194	230.559	113.194	260.61	170.933	217.802	206.176	0	0	0	0	178.48	43.1378	149.752	313.005	243.555	123.503	49.0521
TcCLB.510377.50	39	32	7	0	0	0	0	0	0	0	368.506	370.659	157.788	136.417	221.422	228.722	161.041	255.834	155.363	0	132.575	167.614	224.15	34.0239	165.139	272.191	282.954	159.412	197.378	170.933	295.852	130.287	167.614	117.576	250.142	270.249	217.802	206.176	206.176	425.819	102.486	147.369	161.041	185.279	186.991	271.22	278.045	230.559	0
TcCLB.510551.20	39	32	7	0	0	0	0	0	0	0	389.127	345.102	152.148	100.388	245.431	238.886	188.71	121.269	193.895	0	114.648	132.575	215.101	358.87	156.17	272.191	280.005	158.599	162.676	141.858	241.684	134.876	152.95	77.6439	237.027	138.74	217.802	175.952	202.642	432.607	119.787	128.769	184.424	107.439	122.012	193.895	293.855	142.641	116.109
TcCLB.510713.160	39	32	7	0	0	0	0	0	0	0	335.676	359.936	121.269	187.85	247.312	216.901	163.496	151.348	222.331	0	150.55	130.287	325.306	178.48	210.623	131.81	280.005	0	204.406	133.34	286.902	125.751	186.991	88.1044	322.216	149.752	182.719	237.027	202.642	397.92	100.388	161.041	141.076	108.153	141.858	291.863	217.802	0	33.539
TcCLB.510833.40	39	32	7	0	0	0	0	0	0	0	394.615	258.696	73.2078	146.577	179.325	113.194	98.9967	199.128	178.48	0	148.162	108.153	265.415	275.113	165.139	236.099	240.75	159.412	220.516	114.648	231.479	134.876	227.805	148.957	202.642	141.858	217.802	225.975	187.85	432.607	184.424	144.999	89.4427	156.978	129.527	170.101	300.864	183.571	0
TcCLB.504239.260	39	31	8	0	0	0	0	0	0	0	394.615	370.659	137.964	111.024	194.764	228.722	155.363	248.254	131.048	0	136.417	172.601	235.173	271.22	225.062	272.191	280.005	204.406	137.964	113.194	295.852	120.527	243.555	117.576	267.345	218.706	217.802	206.176	206.176	425.819	211.516	147.369	167.614	188.71	186.991	353.553	278.045	230.559	0
TcCLB.506139.100060	39	31	8	0	0	0	0	0	0	0	394.615	347.209	164.317	108.869	211.516	230.559	224.15	225.975	193.028	0	46.3324	130.287	237.956	171.766	191.297	272.191	282.954	165.963	131.048	125.751	252.982	134.876	160.226	101.785	301.869	171.766	177.636	237.027	202.642	432.607	105.307	124.251	106.016	170.933	210.623	265.415	196.506	0	30.6789
TcCLB.506499.170	39	31	8	0	0	0	0	0	0	0	368.506	379.312	157.788	136.417	194.764	228.722	155.363	248.254	130.287	0	136.417	139.517	286.902	218.706	165.139	272.191	282.954	171.766	137.964	113.194	262.528	130.287	216	117.576	267.345	218.706	217.802	206.176	206.176	356.74	157.788	147.369	190.433	188.71	210.623	353.553	278.045	225.975	0
TcCLB.506609.30	39	31	8	0	0	0	0	0	0	0	394.615	370.659	113.194	166.788	285.913	187.85	77.6439	222.331	110.304	0	160.226	131.048	218.706	346.155	202.642	272.191	253.931	124.251	156.978	125	258.696	134.876	180.171	98.9967	243.555	218.706	167.614	225.975	143.425	328.406	157.788	127.257	64	181.869	185.279	332.554	257.74	159.412	0
TcCLB.506667.160	39	31	8	0	0	0	0	0	0	0	394.615	332.554	113.194	166.788	233.324	187.85	81.5149	172.601	133.34	0	171.766	131.048	211.516	350.376	202.642	272.191	280.005	150.55	122.757	133.34	258.696	134.876	243.555	94.8626	243.555	218.706	167.614	237.027	143.425	328.406	157.788	127.257	64	181.869	185.279	332.554	257.74	159.412	0
TcCLB.508165.40	39	31	8	0	0	0	0	0	0	0	366.357	395.716	152.148	154.557	242.619	225.975	216	207.951	222.331	0	112.469	152.95	263.489	156.17	225.062	203.523	280.005	119.048	172.601	108.869	252.982	103.894	193.895	0	207.951	182.719	190.433	181.019	208.84	374.977	40.0202	161.041	122.012	162.676	176.793	285.913	225.062	0	28.3612
TcCLB.508873.1000430	39	31	8	0	0	0	0	0	0	0	348.263	347.209	82.1661	163.496	213.306	223.24	136.417	116.841	142.641	0	116.841	169.271	308.94	271.22	225.062	175.112	282.954	184.424	156.978	96.9223	234.248	134.876	243.555	107.439	289.875	128.012	149.752	237.027	213.306	425.819	211.516	125.751	182.719	185.279	208.84	353.553	278.045	221.422	0
TcCLB.510021.220	39	31	8	0	0	0	0	0	0	0	366.357	334.634	133.34	154.557	242.619	247.312	197.378	194.764	222.331	0	163.496	152.95	275.113	156.17	225.062	203.523	280.005	122.012	172.601	113.92	218.706	106.016	155.363	0	207.951	182.719	190.433	181.019	208.84	397.92	144.211	161.041	122.012	162.676	161.041	285.913	224.15	0	42.0899
TcCLB.510279.10	39	31	8	0	0	0	0	0	0	0	356.74	370.659	152.148	99.6914	193.028	209.731	123.503	78.2847	169.271	0	134.107	82.1661	296.852	243.555	202.642	272.191	282.954	0	174.274	186.991	252.982	81.5149	216	68.8595	289.875	212.41	217.802	225.975	213.306	432.607	137.964	161.041	116.109	145.787	176.793	321.188	225.062	0	29.7445
TcCLB.510377.10	39	31	8	0	0	0	0	0	0	0	394.615	362.073	137.964	136.417	194.764	228.722	155.363	230.559	130.287	0	132.575	139.517	300.864	249.197	165.139	272.191	282.954	167.614	137.964	113.194	224.15	130.287	216	117.576	257.74	218.706	217.802	206.176	206.176	356.74	157.788	147.369	190.433	185.279	186.991	274.138	278.045	230.559	0
TcCLB.510627.30	39	31	8	0	0	0	0	0	0	0	394.615	310.97	140.296	179.325	255.834	187.85	60.434	176.793	165.139	0	180.171	114.648	218.706	311.987	162.676	272.191	124.251	122.012	100.388	152.95	225.062	111.746	152.95	66.4149	301.869	198.252	167.614	203.523	183.571	343	157.788	127.257	54.6442	219.61	185.279	274.138	308.94	133.34	0
TcCLB.511063.40	39	31	8	0	0	0	0	0	0	0	374.977	367.431	82.1661	150.55	193.895	220.516	186.991	182.719	193.895	0	141.858	213.306	259.652	193.895	225.062	272.191	280.005	164.317	148.957	145.787	252.982	125.751	213.306	82.8191	259.652	116.109	156.17	225.975	202.642	393.515	114.648	106.727	161.041	128.012	158.599	290.869	225.062	0	0
TcCLB.508161.20	39	30	9	0	0	0	0	0	0	0	394.615	322.216	152.148	118.311	285.913	209.731	216	225.062	222.331	0	174.274	198.252	296.852	224.15	202.642	251.087	280.005	105.307	177.636	117.576	198.252	134.876	161.041	0	169.271	137.964	139.517	236.099	206.176	432.607	133.34	161.041	141.076	139.517	175.112	321.188	225.062	0	30.6789
TcCLB.510061.30	39	30	9	0	0	0	0	0	0	167.614	368.506	338.809	157.788	71.3334	255.834	125.751	109.586	175.952	132.575	0	174.274	92.8177	263.489	225.062	177.636	239.818	282.954	127.257	194.764	152.95	216	130.287	150.55	92.1394	315.044	148.162	178.48	222.331	165.963	349.319	163.496	105.307	128.769	120.527	168.442	252.982	211.516	0	0
TcCLB.507479.20	39	29	10	0	0	0	0	0	0	0	394.615	332.554	135.646	394.615	255.834	166.788	255.834	215.101	171.766	73.2078	99.6914	78.9272	228.722	156.17	153.753	196.506	209.731	68.8595	229.64	201.761	221.422	355.677	115.378	0	177.636	0	123.503	198.252	467.084	248.254	242.619	133.34	44.7256	252.982	166.788	378.227	284.926	192.161	376.06
TcCLB.507653.20	39	29	10	0	0	0	0	0	0	0	327.371	327.371	91.4627	278.045	218.706	170.101	355.677	214.203	154.557	34.0239	179.325	84.1302	260.61	318.111	131.048	139.517	218.706	82.8191	299.859	111.746	216	284.926	122.012	0	234.248	0	122.757	235.173	602.052	229.64	209.731	133.34	77.6439	213.306	165.139	328.406	320.161	156.17	389.127
TcCLB.510359.1000490	39	28	11	0	0	0	0	0	0	0	391.319	254.882	41.0507	254.882	255.834	225.062	182.719	276.089	171.766	43.6649	161.041	221.422	175.112	368.506	193.028	151.348	271.22	92.8177	269.28	78.9272	204.406	266.379	71.3334	0	231.479	0	125	183.571	413.466	116.109	177.636	137.19	68.8595	194.764	161.041	404.558	363.142	270.249	73.2078
TcCLB.415459.20001	39	27	12	0	0	0	0	0	0	0	391.319	328.406	97.6121	0	261.568	161.041	502.43	0	104.599	231.479	170.101	125.751	256.786	301.869	116.841	158.599	510.8	0	161.041	154.557	235.173	0	189.571	0	263.489	291.863	190.433	214.203	150.55	288.883	193.028	212.41	0	169.271	194.764	255.834	206.176	200.004	295.852
TcCLB.504065.100050	39	27	12	0	0	0	0	0	0	0	394.615	370.659	131.048	0	193.028	637.863	350.376	0	144.999	161.041	155.363	47.958	286.902	233.324	116.841	158.599	604.587	0	167.614	163.496	155.363	0	178.48	0	228.722	225.975	226.89	159.412	150.55	266.379	128.769	142.641	0	148.957	244.492	237.956	165.139	268.312	362.073
TcCLB.509905.170	39	27	12	0	0	0	0	0	0	0	362.073	370.659	77.0048	0	149.752	144.211	518.012	0	133.34	171.766	131.81	97.6121	286.902	225.062	115.378	158.599	532.535	0	167.614	133.34	204.406	0	193.895	0	263.489	261.568	148.957	200.004	160.226	300.864	161.858	215.101	0	184.424	141.858	255.834	188.71	217.802	296.852
TcCLB.510093.20	39	27	12	0	0	0	0	0	0	0	343	292.859	58.6767	0	231.479	162.676	440.573	0	137.19	237.027	156.978	75.0983	308.94	253.931	116.841	158.599	525.257	0	174.274	121.269	186.991	0	178.48	0	228.722	225.975	226.89	160.226	200.882	266.379	165.139	187.85	0	165.963	293.855	286.902	196.506	184.424	305.903
TcCLB.511831.10	39	27	12	0	0	0	0	0	0	0	356.74	226.89	70.0928	743.9	205.291	179.325	520.423	0	111.024	190.433	115.378	92.8177	277.066	262.528	103.894	158.599	585.662	0	153.753	147.369	181.019	0	151.348	0	164.317	309.955	226.89	262.528	144.999	288.883	236.099	212.41	0	144.211	209.731	286.902	162.676	237.956	248.254
TcCLB.462379.20001	39	26	13	0	0	0	0	0	0	0	355.677	334.634	65.8084	0	209.731	946.489	310.97	0	137.19	267.345	171.766	100.388	216.901	301.869	116.841	158.599	632.705	0	192.161	133.34	180.171	0	193.895	0	263.489	261.568	129.527	170.933	160.226	300.864	165.139	212.41	0	184.424	193.895	228.722	200.882	266.379	305.903
TcCLB.505201.50	39	26	13	0	0	0	0	0	0	0	379.312	330.477	0	322.216	237.956	824.106	376.06	0	86.7729	238.886	166.788	136.417	277.066	308.94	115.378	144.999	510.8	0	180.171	156.978	251.087	0	160.226	0	263.489	286.902	182.719	188.71	175.112	256.786	165.139	212.41	0	131.81	266.379	247.312	210.623	218.706	376.06
TcCLB.505365.60	39	26	13	0	0	0	0	0	0	0	308.94	370.659	0	315.044	236.099	832.559	340.902	0	152.148	150.55	167.614	78.9272	217.802	306.914	116.841	158.599	422.438	0	184.424	152.95	188.71	0	176.793	0	263.489	286.902	226.89	207.063	200.882	266.379	124.251	212.41	0	168.442	255.834	255.834	188.71	207.951	422.438
TcCLB.505997.80	39	26	13	0	0	0	0	0	0	0	257.74	301.869	0	277.066	184.424	760.269	334.634	0	137.19	210.623	132.575	49.6022	224.15	237.027	116.841	158.599	545.965	0	167.614	131.048	190.433	0	170.101	0	192.161	186.134	141.858	196.506	131.048	300.864	122.012	212.41	0	180.171	185.279	272.191	191.297	143.425	232.401
TcCLB.506217.40	39	26	13	0	0	0	0	0	0	0	394.615	306.914	0	321.188	199.128	848.129	374.977	0	137.19	206.176	148.957	86.1097	220.516	280.987	116.841	158.599	429.209	0	120.527	143.425	194.764	0	148.957	0	206.176	269.28	165.139	214.203	161.858	300.864	177.636	212.41	0	137.19	244.492	236.099	184.424	258.696	434.878
TcCLB.506331.50	39	26	13	0	0	0	0	0	0	0	364.213	259.652	0	95.5475	237.956	879.557	383.664	0	136.417	134.107	173.437	39.5082	268.312	303.884	103.894	158.599	508.404	0	181.019	147.369	167.614	0	198.252	0	263.489	251.087	134.876	196.506	160.226	282.954	154.557	212.41	0	138.74	188.71	253.931	177.636	147.369	225.975
TcCLB.506623.20	39	26	13	0	0	0	0	0	0	0	394.615	259.652	94.1793	0	237.956	879.557	383.664	0	136.417	134.107	173.437	39.5082	268.312	303.884	103.894	158.599	508.404	0	181.019	147.369	167.614	0	198.252	0	263.489	251.087	134.876	196.506	160.226	282.954	154.557	212.41	0	138.74	188.71	253.931	177.636	147.369	225.975
TcCLB.506975.90	39	26	13	0	0	0	0	0	0	0	391.319	324.275	0	224.15	193.028	828.329	308.94	0	140.296	188.71	155.363	62.2085	243.555	306.914	116.841	158.599	656.025	0	161.041	166.788	198.252	0	198.252	0	274.138	295.852	129.527	175.112	176.793	230.559	161.858	212.41	0	137.19	181.869	255.834	169.271	155.363	290.869
TcCLB.507313.20	39	26	13	0	0	0	0	0	0	0	251.087	283.939	0	285.913	203.523	730.35	411.233	0	122.012	248.254	167.614	134.107	228.722	264.451	116.841	158.599	537.406	0	172.601	143.425	204.406	0	176.793	0	252.034	306.914	134.876	213.306	181.019	288.883	163.496	212.41	0	165.963	200.882	268.312	178.48	195.634	469.413
TcCLB.507759.10	39	26	13	0	0	0	0	0	0	0	352.493	359.936	0	323.245	237.956	918.645	411.233	0	144.999	215.101	170.101	84.1302	269.28	270.249	102.486	158.599	646.923	0	137.964	139.517	173.437	0	189.571	0	249.197	306.914	226.89	188.71	200.882	288.883	181.869	215.101	0	152.95	255.834	255.834	195.634	230.559	391.319
TcCLB.508521.20	39	26	13	0	0	0	0	0	0	0	323.245	271.22	125.751	227.805	0	899.754	326.338	0	174.274	147.369	156.978	139.517	241.684	285.913	94.1793	158.599	578.148	0	174.274	134.876	203.523	0	193.895	0	263.489	238.886	165.139	214.203	227.805	241.684	131.81	215.101	0	180.171	263.489	252.982	185.279	269.28	397.92
TcCLB.508677.100040	39	26	13	0	0	0	0	0	0	0	311.987	296.852	124.251	255.834	0	921.563	307.927	0	184.424	161.041	156.978	69.4752	241.684	285.913	95.5475	158.599	578.148	0	174.274	134.876	203.523	0	176.793	0	263.489	238.886	165.139	214.203	227.805	266.379	236.099	215.101	0	160.226	237.956	252.982	184.424	193.895	407.891
TcCLB.509221.50	39	26	13	0	0	0	0	0	0	0	367.431	285.913	87.4378	774.001	32.5762	193.028	573.157	0	101.086	216.901	0	95.5475	243.555	335.676	116.841	119.787	255.834	0	51.823	108.153	195.634	0	190.433	0	249.197	118.311	156.17	196.506	153.753	246.371	146.577	134.876	0	152.148	175.112	200.004	210.623	216	425.819
TcCLB.509295.100030	39	26	13	0	0	0	0	0	0	0	386.938	319.136	60.434	0	267.345	832.559	324.275	0	104.599	216.901	119.787	95.5475	243.555	281.97	116.841	141.076	319.136	0	155.363	108.153	185.279	0	169.271	0	249.197	123.503	142.641	196.506	153.753	246.371	146.577	187.85	0	152.148	247.312	271.22	210.623	192.161	329.441
TcCLB.509387.10	39	26	13	0	0	0	0	0	0	0	355.677	281.97	155.363	0	237.956	866.654	294.853	0	146.577	267.345	171.766	93.4977	216.901	291.863	115.378	158.599	632.705	0	167.614	148.162	180.171	0	193.895	0	249.197	261.568	129.527	214.203	160.226	300.864	179.325	215.101	0	184.424	187.85	228.722	200.882	264.451	305.903
TcCLB.509663.50	39	26	13	0	0	0	0	0	0	0	394.615	297.853	184.424	0	237.956	825.513	340.902	0	137.19	210.623	128.012	51.2647	207.063	298.856	116.841	158.599	617.315	0	177.636	149.752	204.406	0	193.895	0	263.489	270.249	130.287	214.203	170.933	300.864	198.252	212.41	0	149.752	182.719	225.062	200.004	190.433	369.582
TcCLB.509765.50	39	26	13	0	0	0	0	0	0	0	352.493	370.659	0	346.155	237.956	1018.05	411.233	0	133.34	216.901	150.55	78.9272	249.197	278.045	103.894	158.599	623.712	0	163.496	172.601	181.019	0	180.171	0	216.901	223.24	226.89	188.71	148.957	300.864	177.636	187.85	0	160.226	265.415	272.191	201.761	223.24	403.449
TcCLB.510307.240	39	26	13	0	0	0	0	0	0	0	339.855	330.477	0	217.802	237.956	883.872	337.763	0	146.577	183.571	156.17	49.6022	277.066	298.856	102.486	158.599	549.647	0	161.041	140.296	199.128	0	172.601	0	249.197	282.954	141.858	196.506	142.641	300.864	163.496	215.101	0	138.74	266.379	235.173	187.85	230.559	361.004
TcCLB.511669.10	39	26	13	0	0	0	0	0	0	0	240.75	384.754	0	253.931	238.886	797.531	377.143	0	113.92	154.557	150.55	103.894	277.066	271.22	103.189	158.599	564.457	0	167.614	155.363	186.991	0	164.317	0	220.516	278.045	156.17	237.027	160.226	300.864	156.17	212.41	0	154.557	200.882	268.312	177.636	161.858	327.371
TcCLB.506961.150	39	25	14	0	0	0	0	0	0	0	394.615	376.06	0	331.515	199.128	924.484	322.216	0	137.19	138.74	170.101	58.0948	243.555	338.809	108.153	138.74	646.923	0	161.041	137.964	173.437	93.4977	207.951	0	263.489	264.451	182.719	213.306	193.895	288.883	207.951	187.85	0	157.788	186.991	271.22	0	230.559	392.416
TcCLB.506741.10	38	34	4	0	0	0	0	0	0	0	0	0	152.148	101.086	209.731	182.719	106.016	0	215.101	0	201.761	62.2085	262.528	134.107	210.623	272.191	280.005	0	180.171	125	291.863	94.8626	184.424	41.0507	265.415	216.901	217.802	237.027	155.363	432.607	163.496	131.81	101.086	0	202.642	205.291	277.066	210.623	215.101
TcCLB.508247.90	38	34	4	0	0	0	0	0	0	0	379.312	364.213	155.363	159.412	228.722	230.559	224.15	214.203	174.274	0	131.048	141.858	308.94	64	225.062	221.422	282.954	0	175.952	156.978	213.306	0	186.991	124.251	252.982	218.706	180.171	203.523	200.882	432.607	263.489	110.304	100.388	88.7727	196.506	224.15	241.684	129.527	51.2647
TcCLB.511923.1000100	38	34	4	0	0	0	0	0	0	0	367.431	322.216	113.194	49.6022	216	100.388	101.086	0	187.85	0	125	73.8361	241.684	185.279	210.623	236.099	280.005	0	222.331	131.048	286.902	116.841	145.787	134.876	332.554	210.623	215.101	225.975	206.176	432.607	136.417	165.963	151.348	52.3832	217.802	250.142	298.856	0	196.506
TcCLB.508121.150	38	33	5	0	0	0	0	0	0	0	394.615	330.477	137.19	116.841	207.063	118.311	109.586	0	136.417	0	0	128.769	328.406	151.348	148.957	251.087	217.802	96.2341	175.112	132.575	252.982	134.876	178.48	41.0507	329.441	186.991	167.614	237.027	206.176	432.607	172.601	98.9967	175.112	0	161.041	171.766	264.451	216	366.357
TcCLB.508221.180	38	33	5	0	0	0	0	0	0	0	349.319	370.659	127.257	134.876	245.431	181.869	128.012	0	159.412	0	101.086	0	315.044	237.956	137.19	272.191	267.345	0	129.527	113.194	295.852	111.024	223.24	100.388	275.113	158.599	186.134	225.975	206.176	432.607	174.274	128.012	119.787	200.004	152.95	174.274	235.173	126.503	72.5812
TcCLB.509085.50	38	33	5	0	0	0	0	0	0	0	0	0	90.1144	0	141.076	184.424	116.109	0	146.577	0	102.486	67.6335	207.063	233.324	191.297	236.099	0	84.7883	122.757	119.048	238.886	105.307	197.378	37.4824	285.913	160.226	111.024	214.203	148.957	421.313	181.019	110.304	130.287	194.764	112.469	175.952	247.312	239.818	170.101
TcCLB.511077.100040	38	33	5	0	0	0	0	0	0	0	391.319	318.111	67.6335	76.3675	203.523	205.291	123.503	0	189.571	0	115.378	0	189.571	44.1942	154.557	209.731	280.005	148.162	176.793	133.34	239.818	130.287	246.371	0	297.853	158.599	217.802	237.027	177.636	432.607	98.9967	90.1144	141.076	191.297	175.112	194.764	324.275	105.307	284.926
TcCLB.511599.80	38	33	5	0	0	0	0	0	0	0	356.74	383.664	131.81	92.1394	205.291	153.753	74.4663	0	217.802	0	141.076	82.8191	210.623	353.553	225.062	251.087	282.954	0	184.424	119.787	281.97	113.194	165.139	137.964	279.024	157.788	180.171	208.84	206.176	432.607	96.9223	142.641	122.012	175.952	151.348	279.024	224.15	31.6228	0
TcCLB.504479.10	38	32	6	0	0	0	0	0	0	0	394.615	383.664	82.8191	163.496	177.636	0	229.64	125.751	123.503	0	47.958	104.599	236.099	185.279	124.251	125.751	183.571	38.9984	299.859	77.6439	182.719	207.951	46.3324	0	223.24	0	148.957	156.17	206.176	192.161	128.769	111.024	114.648	238.886	122.757	136.417	308.94	142.641	0
TcCLB.506279.250	38	32	6	0	0	0	0	0	0	0	0	0	0	0	0	236.099	71.9564	0	132.575	29.281	120.527	59.2605	269.28	49.6022	225.062	221.422	280.005	186.134	134.107	128.769	216	108.153	183.571	148.957	325.306	220.516	217.802	217.802	213.306	341.951	156.17	110.304	77.0048	122.757	176.793	231.479	229.64	204.406	202.642
TcCLB.506335.1000130	38	32	6	0	0	0	0	0	0	0	384.754	292.859	99.6914	155.363	285.913	275.113	193.895	164.317	174.274	0	127.257	203.523	251.087	172.601	210.623	221.422	280.005	125.751	219.61	172.601	164.317	119.048	243.555	68.8595	259.652	186.991	216.901	237.027	206.176	432.607	112.469	142.641	101.785	43.6649	194.764	256.786	215.101	0	0
TcCLB.506589.130	38	32	6	0	0	0	0	0	0	0	362.073	384.754	89.4427	32.5762	195.634	236.099	71.9564	0	115.378	0	174.274	80.2176	279.024	215.101	32.5762	221.422	277.066	0	108.153	155.363	268.312	113.194	162.676	148.957	322.216	158.599	215.101	237.027	202.642	432.607	214.203	106.016	120.527	62.2085	105.307	204.406	322.216	0	124.251
TcCLB.506955.1000130	38	32	6	0	0	0	0	0	0	0	367.431	268.312	73.2078	0	154.557	103.189	114.648	199.128	187.85	0	148.162	108.153	208.84	227.805	165.139	251.087	191.297	128.012	187.85	114.648	254.882	113.194	265.415	98.9967	263.489	136.417	217.802	203.523	152.95	339.855	161.041	156.978	82.1661	148.162	124.251	170.101	165.139	242.619	0
TcCLB.506955.100090	38	32	6	0	0	0	0	0	0	0	361.004	356.74	67.0233	78.9272	218.706	211.516	67.6335	0	191.297	0	136.417	96.9223	280.005	295.852	165.139	221.422	282.954	135.646	187.85	114.648	254.882	113.194	265.415	98.9967	263.489	136.417	217.802	181.869	152.95	280.005	161.041	125.751	82.1661	148.162	106.727	145.787	213.306	205.291	0
TcCLB.506967.10	38	32	6	0	0	0	0	0	0	0	394.615	353.553	146.577	116.841	206.176	225.975	186.134	181.019	174.274	0	131.81	153.753	298.856	83.4738	191.297	272.191	282.954	141.858	165.139	125.751	252.982	0	181.019	137.964	295.852	204.406	152.148	206.176	208.84	432.607	183.571	147.369	180.171	185.279	193.028	290.869	320.161	195.634	0
TcCLB.508633.20	38	32	6	0	0	0	0	0	0	0	314.024	383.664	108.153	115.378	285.913	206.176	90.7877	223.24	198.252	0	110.304	128.769	163.496	244.492	202.642	272.191	166.788	0	184.424	140.296	286.902	120.527	165.139	119.048	259.652	171.766	177.636	207.063	157.788	432.607	121.269	144.211	156.978	148.957	202.642	256.786	275.113	159.412	0
TcCLB.508877.10	38	32	6	0	0	0	0	0	0	0	379.312	0	127.257	98.9967	207.063	201.761	99.6914	0	193.028	0	122.757	242.619	253.931	220.516	140.296	272.191	286.902	201.761	149.752	125	186.991	119.048	195.634	117.576	207.063	136.417	217.802	222.331	213.306	421.313	115.378	147.369	191.297	200.004	178.48	220.516	303.884	161.858	0
TcCLB.509097.20	38	32	6	0	0	0	0	0	0	0	394.615	322.216	164.317	184.424	206.176	225.975	161.041	193.028	172.601	0	131.81	137.964	298.856	83.4738	225.062	272.191	234.248	113.92	165.139	125.751	252.982	0	181.019	105.307	283.939	205.291	152.148	206.176	165.963	359.936	156.17	147.369	171.766	185.279	193.028	290.869	300.864	195.634	0
TcCLB.510021.120	38	32	6	0	0	0	0	0	0	0	394.615	287.892	86.1097	102.486	175.112	122.757	100.388	146.577	199.128	0	147.369	84.1302	210.623	157.788	225.062	272.191	282.954	168.442	147.369	174.274	239.818	130.287	265.415	93.4977	223.24	160.226	186.991	203.523	227.805	425.819	105.307	131.048	147.369	153.753	216	247.312	211.516	0	0
TcCLB.510363.60	38	32	6	0	0	0	0	0	0	0	383.664	384.754	97.6121	148.957	199.128	181.019	116.841	106.016	193.895	0	164.317	99.6914	193.028	224.15	225.062	272.191	233.324	0	155.363	79.5715	272.191	125.751	223.24	137.964	295.852	98.3036	186.134	154.557	230.559	432.607	191.297	131.048	151.348	148.162	193.028	230.559	260.61	168.442	0
TcCLB.510377.330	38	32	6	0	0	0	0	0	0	0	319.136	252.982	164.317	102.486	175.112	122.757	84.1302	66.4149	199.128	0	147.369	84.1302	256.786	157.788	225.062	272.191	282.954	168.442	147.369	174.274	239.818	130.287	265.415	93.4977	223.24	160.226	186.991	203.523	227.805	425.819	96.9223	131.048	147.369	155.363	216	247.312	211.516	0	0
TcCLB.511255.190	38	32	6	0	0	0	0	0	0	0	359.936	384.754	56.9367	141.858	215.101	231.479	103.894	0	144.211	0	0	67.6335	211.516	54.6442	202.642	272.191	282.954	0	207.063	161.858	286.902	134.876	193.895	91.4627	310.97	205.291	215.101	204.406	227.805	374.977	145.787	100.388	139.517	44.7256	128.769	353.553	255.834	240.75	186.991
TcCLB.511255.490	38	32	6	0	0	0	0	0	0	0	394.615	370.659	157.788	0	249.197	130.287	116.109	54.6442	217.802	0	142.641	90.1144	268.312	194.764	202.642	272.191	282.954	64.6009	170.933	117.576	272.191	134.876	187.85	102.486	289.875	200.882	217.802	135.646	199.128	356.74	216	111.746	90.7877	181.869	193.028	229.64	305.903	147.369	0
TcCLB.511603.450	38	32	6	0	0	0	0	0	0	0	394.615	268.312	106.727	116.841	206.176	225.975	186.134	181.019	174.274	0	131.81	169.271	298.856	83.4738	191.297	251.087	282.954	113.92	166.788	125.751	252.982	0	181.019	137.964	283.939	192.161	152.148	206.176	165.963	359.936	183.571	147.369	180.171	185.279	193.028	290.869	320.161	216	0
TcCLB.511871.150	38	32	6	0	0	0	0	0	0	0	355.677	374.977	118.311	96.9223	141.076	201.761	116.109	0	195.634	0	193.028	65.2037	226.89	131.048	225.062	236.099	280.005	119.787	193.028	118.311	264.451	130.287	225.062	54.0759	234.248	182.719	226.89	225.975	206.176	432.607	82.8191	146.577	223.24	148.957	175.112	266.379	202.642	0	0
TcCLB.511873.10	38	32	6	0	0	0	0	0	0	0	355.677	321.188	124.251	81.5149	202.642	150.55	133.34	0	195.634	0	193.028	65.2037	226.89	131.048	181.869	236.099	261.568	119.787	193.028	118.311	191.297	130.287	209.731	44.1942	287.892	187.85	137.19	175.112	162.676	432.607	82.8191	146.577	223.24	148.957	175.112	266.379	208.84	0	0
TcCLB.504101.50	38	31	7	0	0	0	0	0	0	0	349.319	322.216	30.2105	124.251	144.999	141.076	93.4977	0	166.788	0	136.417	101.785	175.112	275.113	165.139	251.087	236.099	138.74	144.211	141.858	286.902	114.648	227.805	74.4663	249.197	146.577	159.412	237.027	118.311	262.528	134.107	174.274	106.016	235.173	180.171	300.864	279.024	137.964	0
TcCLB.506471.120	38	31	7	0	0	0	0	0	0	258.696	361.004	353.553	82.8191	166.788	177.636	0	229.64	131.81	123.503	0	47.958	104.599	236.099	160.226	88.7727	125.751	198.252	48.504	299.859	83.4738	166.788	275.113	54.0759	0	223.24	0	148.957	176.793	216.901	178.48	167.614	121.269	84.7883	238.886	151.348	148.957	199.128	0	0
TcCLB.507283.100010	38	31	7	0	0	0	0	0	0	0	291.863	384.754	157.788	195.634	237.956	228.722	149.752	156.17	111.024	0	113.194	176.793	241.684	243.555	210.623	209.731	245.431	159.412	140.296	104.599	216.901	130.287	198.252	117.576	226.89	149.752	161.858	182.719	213.306	323.245	211.516	147.369	190.433	185.279	210.623	313.005	111.024	0	0
TcCLB.507997.30	38	31	7	0	0	0	0	0	0	0	353.553	384.754	90.1144	124.251	188.71	157.788	86.7729	0	211.516	0	180.171	101.785	221.422	250.142	165.139	272.191	216.901	100.388	143.425	134.876	225.062	103.189	177.636	54.6442	263.489	120.527	226.89	237.027	202.642	432.607	97.6121	116.841	125.751	86.1097	113.194	225.975	215.101	34.0239	0
TcCLB.508735.65	38	31	7	0	0	0	0	0	0	0	394.615	370.659	143.425	159.412	228.722	0	74.4663	169.271	131.81	0	144.999	106.016	279.024	120.527	183.571	224.15	234.248	89.4427	142.641	130.287	241.684	88.7727	174.274	46.8722	279.024	168.442	168.442	237.027	151.348	432.607	125.751	131.81	165.139	138.74	115.378	233.324	156.17	0	33.539
TcCLB.510025.50	38	31	7	0	0	0	0	0	0	284.926	394.615	336.719	157.788	111.024	195.634	217.802	127.257	208.84	215.101	0	176.793	0	293.855	303.884	194.764	272.191	282.954	124.251	122.757	128.769	241.684	120.527	243.555	85.4481	279.024	176.793	186.134	206.176	160.226	450.885	94.1793	142.641	131.81	186.134	200.882	281.97	208.84	0	46.8722
TcCLB.510363.250	38	31	7	0	0	0	0	0	0	0	0	0	125.751	150.55	218.706	252.034	140.296	74.4663	186.134	0	105.307	90.7877	249.197	183.571	173.437	190.433	280.005	109.586	162.676	182.719	194.764	134.876	161.858	100.388	275.113	165.963	217.802	203.523	200.882	374.977	244.492	90.1144	108.869	161.858	217.802	263.489	268.312	180.171	0
TcCLB.511061.40	38	31	7	0	0	0	0	0	0	0	374.977	304.893	0	148.957	234.248	275.113	172.601	225.062	186.134	0	148.162	163.496	272.191	204.406	162.676	236.099	280.005	94.1793	165.139	145.787	252.982	134.876	181.019	86.1097	202.642	130.287	217.802	207.063	206.176	432.607	114.648	106.727	161.041	128.012	158.599	290.869	225.062	0	0
TcCLB.511185.80	38	31	7	0	0	0	0	0	0	0	338.809	318.111	103.189	101.785	198.252	252.034	131.048	72.5812	181.869	0	112.469	82.1661	346.155	253.931	141.076	183.571	282.954	0	170.933	149.752	272.191	76.3675	204.406	67.6335	204.406	175.112	217.802	225.975	208.84	359.936	111.024	116.841	173.437	128.012	151.348	246.371	200.882	0	0
TcCLB.511255.1000160	38	31	7	0	0	0	0	0	0	0	334.634	289.875	73.2078	101.785	224.15	90.7877	106.727	196.506	191.297	0	148.162	108.153	175.952	216.901	165.139	218.706	233.324	128.012	187.85	114.648	195.634	122.012	265.415	98.9967	237.956	136.417	139.517	192.161	131.048	425.819	159.412	113.92	82.1661	137.19	115.378	145.787	186.991	202.642	0
TcCLB.506451.20	38	30	8	0	0	0	0	0	0	0	0	0	92.1394	150.55	193.895	214.203	186.991	182.719	193.895	0	141.858	207.951	325.306	235.173	162.676	236.099	280.005	92.1394	186.134	145.787	252.982	134.876	217.802	86.1097	237.027	130.287	217.802	216.901	213.306	432.607	114.648	106.727	173.437	128.012	111.746	290.869	225.062	0	30.6789
TcCLB.506667.90	38	30	8	0	0	0	0	0	0	0	321.188	334.634	141.858	106.727	205.291	247.312	111.024	284.926	222.331	0	135.646	242.619	293.855	306.914	202.642	236.099	282.954	148.162	156.978	145.787	256.786	134.876	243.555	87.4378	257.74	246.371	122.757	169.271	195.634	432.607	131.81	161.041	125.751	175.952	181.869	251.087	147.369	0	0
TcCLB.506759.90	38	30	8	0	0	0	0	0	0	0	343	334.634	102.486	112.469	205.291	206.176	56.3607	257.74	222.331	0	144.999	198.252	263.489	223.24	169.271	272.191	282.954	74.4663	170.933	178.48	213.306	93.4977	233.324	128.769	223.24	160.226	175.112	225.975	213.306	359.936	157.788	151.348	131.81	92.8177	153.753	216.901	218.706	0	0
TcCLB.507357.100	38	30	8	0	0	0	0	0	0	0	394.615	353.553	141.858	151.348	193.028	252.034	155.363	245.431	162.676	0	99.6914	194.764	226.89	255.834	165.139	272.191	188.71	204.406	219.61	147.369	252.982	94.8626	243.555	137.964	272.191	195.634	168.442	187.85	166.788	374.977	94.1793	131.048	162.676	155.363	161.041	237.956	192.161	0	0
TcCLB.508433.40	38	30	8	0	0	0	0	0	0	0	336.719	364.213	73.8361	111.746	31.1496	236.099	95.5475	207.951	222.331	0	134.107	221.422	241.684	339.855	198.252	272.191	300.864	145.787	169.271	119.048	281.97	98.9967	211.516	82.1661	295.852	239.818	215.101	203.523	170.933	432.607	172.601	136.417	121.269	175.952	210.623	280.005	192.161	0	0
TcCLB.509549.10	38	30	8	0	0	0	0	0	0	0	306.914	353.553	85.4481	111.024	233.324	275.113	161.041	245.431	172.601	0	83.4738	189.571	228.722	219.61	165.139	272.191	188.71	174.274	219.61	147.369	252.982	94.8626	243.555	137.964	272.191	195.634	168.442	187.85	166.788	374.977	94.1793	131.048	162.676	155.363	161.041	237.956	206.176	0	0
TcCLB.511183.430	38	30	8	0	0	0	0	0	0	0	368.506	332.554	101.785	123.503	263.489	225.975	122.012	101.086	181.869	0	112.469	82.1661	346.155	253.931	162.676	257.74	282.954	0	161.041	149.752	272.191	76.3675	211.516	67.6335	268.312	192.161	217.802	237.027	213.306	432.607	137.964	116.841	173.437	128.012	151.348	184.424	175.952	0	37.9855
TcCLB.511255.700	38	30	8	0	0	0	0	0	0	0	394.615	353.553	128.012	102.486	207.063	134.107	94.1793	228.722	222.331	0	157.788	242.619	254.882	332.554	194.764	272.191	216.901	108.869	171.766	128.769	286.902	114.648	216	117.576	291.863	210.623	217.802	225.975	227.805	331.515	82.8191	161.041	126.503	200.004	202.642	223.24	196.506	0	0
TcCLB.472357.10	38	29	9	0	0	0	0	0	0	0	347.209	293.855	121.269	154.557	206.176	190.433	128.769	162.676	217.802	0	185.279	0	200.004	295.852	178.48	272.191	261.568	182.719	202.642	106.727	250.142	134.876	192.161	95.5475	310.97	119.048	180.171	161.858	150.55	432.607	184.424	154.557	152.148	170.933	161.041	339.855	223.24	0	0
TcCLB.504343.10	38	29	9	0	0	0	0	0	0	0	394.615	370.659	44.1942	240.75	251.087	0	335.676	271.22	169.271	119.048	113.194	128.769	263.489	300.864	103.894	161.041	271.22	171.766	299.859	172.601	216	355.677	122.012	0	255.834	0	137.964	235.173	462.436	248.254	235.173	137.19	70.7122	216	122.757	405.668	338.809	318.111	541.068
TcCLB.506757.120	38	29	9	0	0	0	0	0	0	0	394.615	324.275	153.753	148.162	259.652	240.75	98.3036	161.858	253.931	0	161.041	0	277.066	292.859	202.642	272.191	282.954	147.369	152.148	125	262.528	114.648	161.858	83.4738	317.088	144.999	163.496	206.176	208.84	403.449	97.6121	131.048	162.676	170.933	188.71	247.312	241.684	0	0
TcCLB.509785.50	38	29	9	0	0	0	0	0	0	0	359.936	316.065	66.4149	163.496	218.706	187.85	152.148	170.933	217.802	0	170.933	0	275.113	159.412	148.957	272.191	282.954	161.041	168.442	189.571	252.982	119.048	137.964	83.4738	252.982	229.64	180.171	217.802	180.171	359.936	141.858	121.269	144.211	170.933	210.623	332.554	223.24	0	0
TcCLB.510359.530	38	29	9	0	0	0	0	0	0	0	386.938	299.859	164.317	143.425	218.706	214.203	178.48	115.378	148.957	0	77.6439	73.2078	348.263	289.875	183.571	272.191	290.869	149.752	162.676	137.964	210.623	113.194	209.731	124.251	317.088	139.517	180.171	237.027	206.176	393.515	166.788	127.257	52.3832	219.61	243.555	291.863	281.97	0	0
TcCLB.510483.210	38	29	9	0	0	0	0	0	0	0	394.615	384.754	125.751	91.4627	64.6009	144.211	165.139	211.516	144.211	0	167.614	165.139	298.856	306.914	225.062	272.191	277.066	116.109	162.676	128.012	224.15	113.194	200.004	117.576	301.869	128.012	217.802	237.027	0	397.92	94.1793	161.041	131.81	200.004	210.623	323.245	184.424	0	37.4824
TcCLB.511885.20	38	29	9	0	0	0	0	0	0	0	394.615	336.719	108.153	309.955	255.834	0	332.554	214.203	154.557	32.5762	88.7727	84.1302	225.975	318.111	134.107	120.527	271.22	149.752	299.859	181.019	207.063	310.97	85.4481	0	225.062	0	123.503	190.433	573.157	259.652	171.766	140.296	35.4924	182.719	161.041	383.664	338.809	259.652	415.703
TcCLB.503501.50	38	28	10	0	0	0	0	0	0	0	394.615	334.634	62.8038	278.045	255.834	0	318.111	235.173	171.766	40.5343	136.417	119.787	263.489	323.245	156.978	141.076	256.786	215.101	299.859	88.7727	196.506	310.97	130.287	0	289.875	0	137.964	222.331	470.58	185.279	216.901	137.19	68.8595	189.571	161.041	347.209	281.97	343	589.431
TcCLB.504183.20	38	28	10	0	0	0	0	0	0	0	394.615	297.853	98.3036	322.216	255.834	0	318.111	170.101	169.271	93.4977	109.586	193.028	263.489	345.102	124.251	173.437	271.22	164.317	244.492	165.139	226.89	310.97	122.012	0	234.248	0	137.964	235.173	612.213	238.886	202.642	137.19	35.0006	146.577	151.348	345.102	338.809	331.515	447.439
TcCLB.504219.40	38	28	10	0	0	0	0	0	0	0	335.676	345.102	62.8038	262.528	251.087	0	335.676	280.005	171.766	40.5343	136.417	119.787	246.371	246.371	106.727	141.076	256.786	191.297	299.859	88.7727	175.952	313.005	122.012	0	237.027	0	125	222.331	446.292	202.642	216.901	137.19	68.8595	252.982	161.041	353.553	292.859	376.06	422.438
TcCLB.505267.100020	38	28	10	0	0	0	0	0	0	0	368.506	355.677	47.414	358.87	255.834	0	335.676	272.191	169.271	56.9367	86.7729	96.9223	263.489	336.719	151.348	131.048	225.975	108.869	178.48	66.4149	226.89	310.97	122.012	0	234.248	0	137.964	235.173	627.561	254.882	229.64	137.19	45.2591	207.951	166.788	453.188	338.809	276.089	589.431
TcCLB.506345.90	38	28	10	0	0	0	0	0	0	0	356.74	331.515	80.2176	344.051	255.834	0	335.676	272.191	169.271	56.9367	86.7729	104.599	263.489	336.719	151.348	147.369	225.975	28.8199	178.48	66.4149	226.89	355.677	103.189	0	234.248	0	137.964	235.173	627.561	254.882	229.64	137.19	45.2591	207.951	166.788	453.188	326.338	294.853	589.431
TcCLB.506537.80	38	28	10	0	0	0	0	0	0	0	355.677	343	71.3334	369.582	255.834	169.271	335.676	278.045	167.614	63.4009	146.577	114.648	263.489	325.306	151.348	143.425	259.652	155.363	299.859	49.6022	181.019	272.191	103.894	0	213.306	0	125	222.331	612.213	280.005	238.886	108.869	32.0983	252.982	164.317	453.188	305.903	177.636	0
TcCLB.507381.20	38	28	10	0	0	0	0	0	0	0	345.102	301.869	61.6151	283.939	234.248	0	276.089	156.17	119.048	201.761	61.0236	227.805	253.931	305.903	173.437	165.963	75.732	58.0948	242.619	253.931	155.363	274.138	122.012	0	228.722	0	125	222.331	424.691	269.28	177.636	137.19	68.8595	235.173	170.933	483.472	338.809	265.415	50.1543
TcCLB.508001.100050	38	28	10	0	0	0	0	0	0	0	391.319	331.515	59.2605	381.486	255.834	0	287.892	237.027	169.271	93.4977	143.425	126.503	272.191	247.312	165.139	153.753	192.161	89.4427	229.64	68.8595	167.614	355.677	83.4738	0	223.24	0	137.964	222.331	663.861	248.254	242.619	133.34	47.958	252.982	170.933	410.118	320.161	331.515	530.105
TcCLB.508061.20	38	28	10	0	0	0	0	0	0	0	332.554	300.864	98.3036	293.855	255.834	0	330.477	272.191	149.752	116.109	140.296	247.312	263.489	295.852	151.348	166.788	180.171	125	244.492	61.0236	200.882	310.97	84.7883	0	255.834	0	125	235.173	504.817	254.882	157.788	133.34	40.0202	207.951	122.757	437.153	338.809	331.515	479.944
TcCLB.509739.10	38	28	10	0	0	0	0	0	0	0	362.073	273.164	62.2085	358.87	247.312	0	350.376	295.852	152.148	108.153	185.279	252.034	263.489	303.884	156.17	187.85	219.61	113.194	244.492	48.504	224.15	339.855	122.012	0	234.248	0	108.869	200.882	612.213	283.939	251.087	133.34	31.6228	175.112	135.646	426.948	326.338	376.06	440.573
TcCLB.509905.100060	38	28	10	0	0	0	0	0	0	0	391.319	266.379	118.311	206.176	255.834	0	332.554	237.027	169.271	93.4977	177.636	122.757	263.489	345.102	124.251	145.787	271.22	164.317	244.492	197.378	226.89	300.864	122.012	0	213.306	0	137.964	209.731	491.736	254.882	202.642	137.19	35.0006	170.101	151.348	329.441	338.809	331.515	64.6009
TcCLB.509915.100050	38	28	10	0	0	0	0	0	0	0	350.376	287.892	98.3036	307.927	255.834	0	309.955	258.696	146.577	113.92	143.425	126.503	272.191	213.306	165.139	166.788	259.652	89.4427	299.859	33.0564	204.406	345.102	96.2341	0	223.24	0	137.964	235.173	438.292	241.684	46.8722	122.012	34.0239	217.802	170.933	357.805	338.809	376.06	589.431
TcCLB.510411.10	38	28	10	0	0	0	0	0	0	0	337.763	384.754	119.787	341.951	255.834	0	282.954	200.882	169.271	93.4977	109.586	88.7727	263.489	345.102	124.251	187.85	280.987	125	244.492	70.0928	186.134	310.97	122.012	0	234.248	0	137.964	235.173	524.047	229.64	201.761	133.34	33.539	252.982	161.041	448.587	326.338	315.044	589.431
TcCLB.510451.10	38	28	10	0	0	0	0	0	0	0	350.376	336.719	35.4924	260.61	211.516	54.6442	294.853	149.752	167.614	0	152.95	88.7727	200.004	87.4378	77.6439	150.55	271.22	140.296	200.882	68.8595	204.406	364.213	96.2341	0	244.492	0	137.964	235.173	438.292	232.401	46.8722	82.1661	34.0239	217.802	170.933	357.805	338.809	331.515	530.105
TcCLB.511349.100	38	28	10	0	0	0	0	0	0	0	394.615	334.634	78.9272	381.486	255.834	0	268.312	244.492	169.271	119.787	159.412	189.571	237.956	284.926	173.437	187.85	251.087	113.194	244.492	48.504	155.363	339.855	115.378	0	234.248	0	125	200.882	612.213	283.939	225.975	133.34	31.6228	252.982	127.257	448.587	338.809	318.111	488.188
TcCLB.508903.110	38	26	12	0	0	0	0	0	0	0	0	338.809	184.424	0	261.568	161.858	571.912	0	137.19	116.109	148.162	123.503	249.197	268.312	116.841	158.599	528.892	0	161.041	172.601	173.437	0	180.171	0	249.197	306.914	165.139	188.71	227.805	288.883	181.869	215.101	0	165.963	274.138	255.834	162.676	223.24	526.467
TcCLB.509815.100020	38	26	12	0	0	0	0	0	0	0	366.357	353.553	0	343	237.956	902.652	367.431	0	78.2847	215.101	143.425	67.6335	286.902	265.415	94.8626	158.599	532.535	0	161.041	121.269	216	0	172.601	0	263.489	0	55.7865	237.027	160.226	300.864	134.107	124.251	0	136.417	226.89	271.22	170.933	231.479	333.594
TcCLB.503861.40	38	25	13	0	0	0	0	0	0	0	348.263	288.883	0	300.864	237.956	879.557	376.06	0	144.999	174.274	160.226	71.3334	239.818	304.893	115.378	170.101	501.238	0	176.793	172.601	200.004	0	198.252	0	208.84	199.128	155.363	216	227.805	266.379	144.211	215.101	0	133.34	139.517	241.684	0	243.555	300.864
TcCLB.509959.60	38	25	13	0	0	0	0	0	0	0	394.615	336.719	0	225.975	237.956	937.666	419.066	0	133.34	216.901	0	94.8626	277.066	294.853	116.841	158.599	585.662	0	161.041	103.894	216.901	0	193.895	0	230.559	228.722	182.719	232.401	160.226	249.197	156.17	215.101	0	141.076	238.886	255.834	178.48	137.964	455.494
TcCLB.506741.100	37	33	4	0	0	0	0	0	0	0	298.856	384.754	140.296	108.869	206.176	177.636	101.785	0	136.417	0	0	128.769	263.489	119.048	183.571	251.087	280.005	0	188.71	132.575	206.176	134.876	200.004	41.0507	329.441	156.17	167.614	237.027	159.412	432.607	148.957	98.9967	154.557	0	125	193.895	264.451	144.211	361.004
TcCLB.504155.280	37	32	5	0	0	0	0	0	0	0	336.719	384.754	93.4977	136.417	211.516	186.991	154.557	191.297	193.895	0	121.269	54.6442	246.371	141.858	191.297	272.191	282.954	175.952	185.279	141.858	190.433	0	186.991	128.769	263.489	191.297	217.802	237.027	208.84	432.607	117.576	103.894	91.4627	121.269	144.211	266.379	272.191	0	0
TcCLB.506737.90	37	32	5	0	0	0	0	0	0	0	368.506	324.275	113.194	61.0236	169.271	154.557	0	111.746	156.978	0	106.016	0	175.112	242.619	165.139	272.191	254.882	0	162.676	141.858	256.786	130.287	170.101	49.0521	317.088	165.963	217.802	237.027	173.437	425.819	120.527	0	57.5148	90.7877	208.84	229.64	332.554	166.788	354.615
TcCLB.507523.10	37	32	5	0	0	0	0	0	0	0	0	0	0	0	0	260.61	175.952	151.348	222.331	0	168.442	131.048	286.902	178.48	210.623	272.191	300.864	0	175.112	131.048	246.371	134.876	233.324	134.876	325.306	119.787	143.425	159.412	196.506	450.885	91.4627	170.101	165.139	44.7256	144.999	262.528	302.876	43.6649	280.005
TcCLB.508219.170	37	32	5	0	0	0	0	0	0	0	345.102	314.024	88.7727	92.8177	172.601	181.869	141.076	0	125	0	0	88.7727	304.893	222.331	225.062	251.087	282.954	143.425	143.425	134.876	216	0	162.676	113.194	270.249	128.769	215.101	217.802	173.437	425.819	164.317	147.369	91.4627	143.425	202.642	0	307.927	181.019	309.955
TcCLB.508229.40	37	32	5	0	0	0	0	0	0	0	394.615	380.399	69.4752	75.732	178.48	242.619	123.503	0	175.952	0	99.6914	0	239.818	240.75	161.858	272.191	282.954	47.414	220.516	0	295.852	134.876	183.571	83.4738	275.113	185.279	217.802	207.063	227.805	432.607	128.769	170.101	44.7256	211.516	172.601	149.752	248.254	232.401	0
TcCLB.510239.80	37	32	5	0	0	0	0	0	0	0	368.506	384.754	119.787	103.894	225.975	220.516	119.787	208.84	217.802	0	121.269	85.4481	225.062	124.251	191.297	272.191	282.954	193.895	185.279	130.287	252.982	0	140.296	119.048	279.024	136.417	177.636	237.027	200.882	432.607	154.557	131.81	82.8191	89.4427	217.802	199.128	302.876	0	0
TcCLB.504081.390	37	31	6	0	0	0	0	0	0	0	343	384.754	125.751	141.858	169.271	252.034	132.575	184.424	213.306	0	128.769	86.7729	272.191	267.345	157.788	272.191	304.893	0	137.964	103.894	295.852	111.024	223.24	100.388	238.886	101.086	226.89	190.433	0	432.607	144.211	98.3036	46.8722	92.1394	194.764	0	307.927	134.876	110.304
TcCLB.504249.100	37	31	6	0	0	0	0	0	0	0	394.615	268.312	73.2078	0	199.128	88.1044	104.599	199.128	180.171	0	148.162	94.8626	220.516	240.75	210.623	236.099	202.642	147.369	187.85	114.648	254.882	103.894	227.805	98.9967	237.956	104.599	217.802	146.577	152.95	425.819	191.297	97.6121	82.1661	156.978	114.648	145.787	235.173	194.764	0
TcCLB.506187.40	37	31	6	0	0	0	0	0	0	0	394.615	268.312	73.2078	0	199.128	82.8191	114.648	199.128	215.101	0	148.162	108.153	208.84	215.101	153.753	221.422	139.517	153.753	181.019	114.648	254.882	88.1044	227.805	98.9967	216.901	136.417	217.802	181.869	152.95	280.005	181.869	53.5097	0	152.148	129.527	170.101	265.415	214.203	0
TcCLB.506597.40	37	31	6	0	0	0	0	0	0	0	368.506	384.754	157.788	128.769	194.764	260.61	155.363	248.254	172.601	0	136.417	189.571	226.89	271.22	225.062	272.191	282.954	167.614	175.952	0	224.15	0	207.063	116.109	262.528	195.634	217.802	206.176	213.306	301.869	179.325	147.369	190.433	161.041	222.331	274.138	278.045	240.75	0
TcCLB.511487.90	37	31	6	0	0	0	0	0	0	0	385.846	349.319	55.2144	103.894	207.063	173.437	75.0983	0	171.766	0	128.012	172.601	257.74	241.684	191.297	272.191	282.954	134.876	197.378	125	295.852	0	217.802	131.048	322.216	225.975	151.348	217.802	227.805	291.863	77.0048	131.048	134.107	175.952	210.623	269.28	223.24	0	0
TcCLB.508139.100080	37	30	7	0	0	0	0	0	0	0	394.615	314.024	143.425	159.412	228.722	0	74.4663	177.636	105.307	0	144.999	97.6121	279.024	106.016	183.571	224.15	234.248	100.388	142.641	109.586	248.254	88.7727	223.24	41.0507	0	138.74	168.442	193.895	206.176	377.143	125.751	131.81	165.139	138.74	115.378	233.324	161.858	0	33.539
TcCLB.508493.100060	37	30	7	0	0	0	0	0	0	0	394.615	203.523	71.3334	101.086	186.134	53.5097	116.841	0	130.287	0	118.311	80.8653	317.088	98.9967	191.297	236.099	280.005	119.787	185.279	132.575	216.901	110.304	172.601	56.3607	315.044	147.369	213.306	225.975	170.933	377.143	141.076	146.577	114.648	134.876	190.433	295.852	225.062	0	0
TcCLB.508495.1000100	37	30	7	0	0	0	0	0	0	0	345.102	251.087	70.0928	92.8177	164.317	169.271	116.841	0	159.412	0	118.311	73.2078	280.005	86.7729	191.297	236.099	245.431	119.787	185.279	132.575	214.203	110.304	172.601	72.5812	315.044	147.369	213.306	225.975	170.933	377.143	141.076	146.577	114.648	150.55	190.433	200.882	225.062	0	0
TcCLB.508495.100020	37	30	7	0	0	0	0	0	0	0	389.127	303.884	117.576	92.8177	164.317	169.271	116.841	0	159.412	0	118.311	73.2078	317.088	86.7729	191.297	272.191	192.161	119.787	185.279	131.048	214.203	110.304	185.279	72.5812	315.044	147.369	213.306	225.975	170.933	377.143	141.076	146.577	114.648	150.55	190.433	200.882	225.062	0	0
TcCLB.508499.39	37	30	7	0	0	0	0	0	0	0	389.127	281.97	128.012	73.2078	200.004	53.5097	116.841	0	130.287	0	111.024	55.7865	317.088	86.7729	156.17	236.099	280.005	119.787	185.279	71.9564	214.203	110.304	172.601	56.3607	315.044	158.599	213.306	225.975	170.933	377.143	141.076	161.041	114.648	150.55	190.433	295.852	225.062	0	0
TcCLB.508539.130	37	30	7	0	0	0	0	0	0	0	0	0	73.2078	146.577	224.15	113.194	98.9967	199.128	178.48	0	148.162	108.153	265.415	275.113	177.636	272.191	217.802	159.412	220.516	114.648	231.479	134.876	227.805	148.957	202.642	141.858	217.802	225.975	147.369	432.607	184.424	170.101	89.4427	156.978	129.527	170.101	300.864	159.412	0
TcCLB.511057.40	37	30	7	0	0	0	0	0	0	0	348.263	364.213	123.503	204.406	218.706	169.271	106.727	118.311	217.802	0	175.952	0	275.113	175.112	148.957	272.191	282.954	227.805	175.112	141.858	281.97	134.876	243.555	37.4824	325.306	161.858	215.101	214.203	200.882	374.977	105.307	110.304	124.251	194.764	168.442	332.554	223.24	0	0
TcCLB.503403.20	37	29	8	0	0	0	0	0	0	0	394.615	383.664	103.189	205.291	156.978	0	229.64	125.751	123.503	0	47.958	104.599	236.099	174.274	90.7877	125.751	154.557	34.5111	299.859	86.7729	182.719	178.48	46.3324	0	223.24	0	148.957	156.17	186.134	229.64	222.331	102.486	111.746	238.886	122.757	136.417	293.855	260.61	455.494
TcCLB.504081.540	37	29	8	0	0	0	0	0	0	0	270.249	335.676	97.6121	165.139	285.913	275.113	165.963	257.74	156.978	0	98.3036	170.933	241.684	0	175.952	272.191	282.954	161.858	141.858	117.576	260.61	134.876	227.805	117.576	234.248	204.406	226.89	206.176	170.933	425.819	172.601	109.586	129.527	128.769	205.291	233.324	207.063	0	0
TcCLB.504265.20001	37	29	8	0	0	0	0	0	0	0	349.319	336.719	82.1661	158.599	251.087	96.2341	350.376	188.71	152.148	49.0521	92.8177	227.805	237.956	269.28	156.17	177.636	233.324	112.469	238.886	240.75	177.636	272.191	90.7877	0	255.834	0	133.34	237.027	653.42	269.28	216	133.34	92.8177	207.951	147.369	405.668	278.045	225.975	0
TcCLB.505949.30	37	29	8	0	0	0	0	0	0	0	352.493	282.954	135.646	179.325	251.087	250.142	157.788	223.24	157.788	0	103.189	200.004	263.489	0	225.062	251.087	282.954	126.503	142.641	125	254.882	130.287	168.442	91.4627	241.684	155.363	186.134	206.176	227.805	397.92	156.17	125	139.517	147.369	210.623	252.982	210.623	0	0
TcCLB.506667.50	37	29	8	0	0	0	0	0	0	0	321.188	328.406	86.1097	123.503	224.15	247.312	111.024	284.926	222.331	0	121.269	242.619	293.855	306.914	225.062	236.099	282.954	148.162	170.933	178.48	264.451	134.876	180.171	114.648	174.274	214.203	167.614	178.48	0	432.607	131.81	161.041	136.417	175.952	181.869	251.087	147.369	0	0
TcCLB.507819.30	37	29	8	0	0	0	0	0	0	0	311.987	370.659	109.586	248.254	255.834	0	350.376	272.191	171.766	28.8199	152.148	75.0983	284.926	208.84	140.296	163.496	256.786	94.1793	299.859	137.964	172.601	294.853	99.6914	0	213.306	0	134.876	216	391.319	254.882	181.019	134.107	71.9564	225.975	162.676	450.885	310.97	244.492	111.746
TcCLB.507875.220	37	29	8	0	0	0	0	0	0	0	317.088	345.102	135.646	176.793	240.75	122.757	287.892	135.646	169.271	86.1097	131.048	252.034	272.191	303.884	131.81	137.19	173.437	101.785	219.61	175.112	175.952	254.882	85.4481	0	234.248	0	123.503	235.173	570.667	205.291	225.975	115.378	0	213.306	170.933	409.004	307.927	263.489	89.4427
TcCLB.507879.10	37	29	8	0	0	0	0	0	0	0	379.312	225.062	82.8191	394.615	255.834	0	291.863	165.963	141.858	86.1097	98.3036	97.6121	263.489	289.875	131.81	187.85	176.793	101.785	185.279	181.019	175.952	254.882	85.4481	0	234.248	0	123.503	235.173	489.37	239.818	225.975	115.378	0	213.306	180.171	409.004	338.809	263.489	119.048
TcCLB.508055.30	37	29	8	0	0	0	0	0	0	0	355.677	336.719	78.2847	203.523	255.834	0	350.376	272.191	171.766	28.8199	131.048	75.0983	284.926	208.84	140.296	163.496	256.786	94.1793	299.859	155.363	175.952	310.97	99.6914	0	213.306	0	151.348	235.173	366.357	254.882	193.895	134.107	71.9564	225.975	162.676	450.885	310.97	244.492	111.746
TcCLB.510205.40	37	29	8	0	0	0	0	0	0	0	359.936	384.754	69.4752	204.406	218.706	187.85	106.727	170.101	217.802	0	175.952	0	275.113	171.766	148.957	272.191	237.956	227.805	171.766	97.6121	281.97	134.876	243.555	37.4824	325.306	161.858	215.101	214.203	200.882	374.977	105.307	110.304	128.012	194.764	168.442	332.554	223.24	0	0
TcCLB.511183.190	37	29	8	0	0	0	0	0	0	0	389.127	309.955	101.785	123.503	263.489	216.901	122.012	101.086	181.869	0	116.109	82.1661	346.155	268.312	144.999	226.89	282.954	0	161.041	149.752	272.191	76.3675	181.019	65.2037	283.939	192.161	217.802	237.027	213.306	359.936	88.7727	116.841	173.437	128.012	151.348	246.371	175.952	0	0
TcCLB.511675.10	37	29	8	0	0	0	0	0	0	0	368.506	230.559	51.823	31.1496	240.75	122.757	56.9367	0	203.523	0	0	92.1394	193.028	177.636	225.062	251.087	282.954	121.269	169.271	166.788	204.406	119.048	136.417	32.5762	283.939	202.642	165.963	237.027	202.642	432.607	108.869	161.041	38.4908	49.6022	141.076	246.371	173.437	0	0
TcCLB.503759.10	37	28	9	0	0	0	0	0	0	0	348.263	370.659	184.424	232.401	225.975	44.1942	315.044	210.623	160.226	0	107.439	71.3334	194.764	265.415	175.952	196.506	189.571	99.6914	299.859	136.417	170.101	206.176	82.1661	0	212.41	0	152.148	235.173	467.084	254.882	315.044	164.317	78.2847	217.802	114.648	474.084	324.275	41.0507	0
TcCLB.503871.10	37	28	9	0	0	0	0	0	0	0	271.22	350.376	62.2085	162.676	171.766	186.991	348.263	51.823	159.412	196.506	179.325	151.348	323.245	259.652	166.788	187.85	243.555	204.406	276.089	189.571	206.176	268.312	71.9564	0	250.142	0	151.348	176.793	274.138	193.895	332.554	110.304	84.7883	193.028	156.17	392.416	209.731	309.955	386.938
TcCLB.504055.130	37	28	9	0	0	0	0	0	0	0	394.615	311.987	47.414	346.155	255.834	0	318.111	237.027	135.646	0	104.599	109.586	295.852	354.615	151.348	78.9272	89.4427	140.296	178.48	158.599	226.89	310.97	105.307	0	227.805	0	137.964	190.433	542.291	254.882	198.252	113.92	111.746	264.451	148.162	438.292	326.338	235.173	105.307
TcCLB.504393.30	37	28	9	0	0	0	0	0	0	0	333.594	313.005	152.148	293.855	255.834	50.1543	315.044	148.957	137.964	0	125.751	54.0759	190.433	293.855	152.148	196.506	200.004	149.752	219.61	113.194	270.249	304.893	68.8595	0	210.623	0	145.787	169.271	362.073	226.89	242.619	152.95	54.0759	252.982	105.307	426.948	268.312	338.809	0
TcCLB.505609.10	37	28	9	0	0	0	0	0	0	0	348.263	313.005	184.424	322.216	255.834	56.9367	315.044	166.788	128.769	0	132.575	88.7727	190.433	293.855	137.19	196.506	159.412	149.752	219.61	137.19	270.249	364.213	81.5149	0	216	0	151.348	237.027	345.102	254.882	315.044	152.95	43.6649	217.802	149.752	449.735	268.312	55.2144	0
TcCLB.506345.40	37	28	9	0	0	0	0	0	0	0	394.615	328.406	86.1097	332.554	255.834	0	318.111	237.027	151.348	0	104.599	119.787	310.97	354.615	151.348	118.311	236.099	140.296	269.28	107.439	226.89	349.319	105.307	0	227.805	0	137.964	197.378	524.047	248.254	198.252	113.92	111.746	264.451	144.999	438.292	326.338	260.61	299.859
TcCLB.506471.100	37	28	9	0	0	0	0	0	0	0	290.869	313.005	78.9272	322.216	217.802	0	304.893	229.64	152.148	67.0233	98.9967	106.016	263.489	194.764	173.437	166.788	184.424	80.8653	216.901	87.4378	226.89	355.677	122.012	0	196.506	0	125	235.173	450.885	254.882	0	133.34	40.0202	252.982	161.041	415.703	326.338	238.886	306.914
TcCLB.506539.100010	37	28	9	0	0	0	0	0	0	0	391.319	332.554	62.2085	133.34	152.95	261.568	348.263	122.757	101.086	250.142	134.876	207.951	229.64	264.451	110.304	98.3036	56.9367	225.062	261.568	214.203	75.732	289.875	71.9564	0	247.312	0	106.727	170.101	411.233	225.975	315.044	134.107	88.7727	245.431	156.17	376.06	165.963	289.875	318.111
TcCLB.506757.60	37	28	9	0	0	0	0	0	0	0	394.615	376.06	57.5148	135.646	178.48	219.61	113.92	161.858	222.331	0	164.317	0	277.066	292.859	178.48	272.191	243.555	189.571	152.148	108.869	295.852	88.1044	165.139	65.2037	315.044	205.291	149.752	206.176	161.041	432.607	97.6121	131.048	137.19	179.325	216	247.312	241.684	0	0
TcCLB.506757.90	37	28	9	0	0	0	0	0	0	0	394.615	257.74	141.858	315.044	255.834	0	335.676	346.155	167.614	154.557	176.793	155.363	246.371	338.809	110.304	187.85	222.331	191.297	271.22	68.8595	175.952	334.634	130.287	0	255.834	0	137.964	164.317	394.615	254.882	0	125	55.7865	207.951	161.041	453.188	338.809	324.275	530.105
TcCLB.506765.40	37	28	9	0	0	0	0	0	0	0	288.883	230.559	69.4752	272.191	255.834	0	335.676	346.155	167.614	170.101	163.496	191.297	246.371	347.209	110.304	173.437	222.331	191.297	271.22	68.8595	200.882	334.634	122.012	0	270.249	0	137.964	164.317	394.615	254.882	0	142.641	62.8038	207.951	161.041	419.066	338.809	324.275	530.105
TcCLB.506809.10	37	28	9	0	0	0	0	0	0	0	328.406	370.659	184.424	276.089	225.975	28.8199	315.044	211.516	171.766	0	131.048	84.1302	219.61	308.94	125.751	150.55	237.027	98.3036	269.28	115.378	170.101	280.005	89.4427	0	122.757	0	148.162	210.623	453.188	220.516	225.062	152.95	61.6151	217.802	111.024	464.758	307.927	35.9865	0
TcCLB.506973.100050	37	28	9	0	0	0	0	0	0	0	394.615	272.191	152.148	121.269	208.84	203.523	307.927	202.642	88.7727	250.142	150.55	148.957	250.142	293.855	122.757	187.85	169.271	211.516	55.7865	161.041	176.793	293.855	102.486	0	128.012	0	151.348	211.516	285.913	211.516	269.28	91.4627	74.4663	116.109	155.363	361.004	78.9272	255.834	353.553
TcCLB.507047.40	37	28	9	0	0	0	0	0	0	0	260.61	289.875	184.424	322.216	255.834	68.2456	359.936	115.378	160.226	0	91.4627	56.3607	216.901	254.882	150.55	196.506	189.571	127.257	271.22	137.19	258.696	286.902	81.5149	0	217.802	0	145.787	237.027	396.817	181.869	304.893	151.348	43.6649	217.802	153.753	474.084	269.28	46.3324	0
TcCLB.507125.10	37	28	9	0	0	0	0	0	0	0	289.875	328.406	84.1302	246.371	255.834	0	262.528	148.162	146.577	0	116.109	121.269	265.415	392.416	151.348	177.636	175.952	80.8653	268.312	135.646	204.406	352.493	115.378	0	250.142	0	145.787	237.027	397.92	254.882	185.279	134.107	73.2078	169.271	152.95	448.587	313.005	241.684	39.5082
TcCLB.507255.20	37	28	9	0	0	0	0	0	0	0	251.087	275.113	137.19	254.882	251.087	0	257.74	213.306	167.614	0	146.577	115.378	271.22	338.809	193.028	141.858	257.74	91.4627	299.859	203.523	227.805	274.138	88.7727	0	228.722	0	133.34	206.176	422.438	225.062	159.412	115.378	165.139	213.306	153.753	399.024	326.338	293.855	521.63
TcCLB.507611.170	37	28	9	0	0	0	0	0	0	0	273.164	347.209	123.503	287.892	255.834	0	271.22	162.676	167.614	0	152.148	111.746	263.489	382.574	148.162	141.858	248.254	133.34	299.859	170.101	198.252	281.97	113.92	0	234.248	0	145.787	235.173	400.129	207.951	166.788	113.92	101.785	264.451	137.964	485.828	284.926	285.913	119.048
TcCLB.507821.130	37	28	9	0	0	0	0	0	0	0	326.338	294.853	49.0521	298.856	255.834	0	332.554	224.15	184.424	73.2078	148.162	111.024	272.191	349.319	186.134	156.978	259.652	97.6121	220.516	137.19	224.15	262.528	88.1044	0	238.886	0	137.964	235.173	537.406	248.254	0	133.34	89.4427	225.975	133.34	461.277	338.809	308.94	458.961
TcCLB.507839.40	37	28	9	0	0	0	0	0	0	0	348.263	370.659	122.757	258.696	225.975	44.1942	298.856	203.523	131.81	0	159.412	67.6335	219.61	265.415	125.751	187.85	189.571	122.012	299.859	105.307	170.101	235.173	82.1661	0	282.954	0	152.148	237.027	448.587	232.401	315.044	152.95	50.1543	174.274	114.648	474.084	324.275	41.0507	0
TcCLB.507859.100080	37	28	9	0	0	0	0	0	0	0	350.376	307.927	119.787	106.016	208.84	207.063	257.74	194.764	113.92	250.142	174.274	148.957	272.191	305.903	178.48	141.076	210.623	225.062	94.8626	161.041	177.636	107.439	102.486	0	212.41	0	151.348	187.85	314.024	203.523	273.164	161.041	168.442	116.109	144.999	403.449	289.875	305.903	323.245
TcCLB.508121.30	37	28	9	0	0	0	0	0	0	0	359.936	274.138	62.2085	125	119.787	183.571	290.869	337.763	166.788	250.142	157.788	252.034	257.74	343	86.1097	149.752	206.176	204.406	285.913	214.203	161.858	289.875	71.9564	0	221.422	0	106.727	144.211	340.902	225.975	258.696	134.107	88.7727	264.451	141.858	279.024	257.74	331.515	370.659
TcCLB.508285.60	37	28	9	0	0	0	0	0	0	0	394.615	305.903	72.5812	318.111	242.619	0	330.477	254.882	167.614	129.527	148.162	146.577	271.22	300.864	151.348	166.788	280.987	84.7883	261.568	47.958	224.15	296.852	93.4977	0	262.528	0	111.024	190.433	470.58	238.886	237.956	137.19	32.0983	207.951	164.317	363.142	338.809	376.06	0
TcCLB.508293.1000160	37	28	9	0	0	0	0	0	0	0	384.754	350.376	50.7085	182.719	226.89	158.599	226.89	203.523	117.576	250.142	81.5149	76.3675	204.406	253.931	94.1793	170.101	196.506	197.378	276.089	166.788	175.952	259.652	130.287	0	125.751	0	151.348	200.882	355.677	231.479	241.684	85.4481	105.307	111.024	118.311	369.582	216.901	237.027	384.754
TcCLB.508389.160	37	28	9	0	0	0	0	0	0	0	394.615	307.927	119.787	135.646	225.975	207.063	290.869	271.22	119.787	250.142	150.55	153.753	253.931	305.903	187.85	170.101	189.571	225.062	285.913	158.599	182.719	336.719	102.486	0	182.719	0	151.348	211.516	318.111	215.101	157.788	138.74	147.369	116.109	125	410.118	257.74	265.415	357.805
TcCLB.508523.30	37	28	9	0	0	0	0	0	0	0	394.615	256.786	55.2144	281.97	255.834	0	252.034	220.516	122.757	93.4977	124.251	264.451	280.005	336.719	144.999	170.933	271.22	101.785	299.859	184.424	200.882	259.652	77.6439	0	221.422	0	124.251	235.173	494.106	283.939	235.173	115.378	0	225.975	126.503	425.819	286.902	257.74	200.882
TcCLB.508999.120	37	28	9	0	0	0	0	0	0	0	364.213	384.754	57.5148	165.139	193.895	231.479	105.307	200.882	217.802	0	181.869	0	228.722	216	147.369	221.422	280.005	150.55	202.642	125	295.852	125.751	165.139	95.5475	227.805	50.7085	178.48	237.027	58.0948	328.406	97.6121	111.746	144.211	147.369	210.623	323.245	223.24	0	0
TcCLB.509185.30	37	28	9	0	0	0	0	0	0	0	348.263	353.553	63.4009	246.371	255.834	0	262.528	141.076	148.957	0	132.575	120.527	265.415	345.102	151.348	196.506	175.952	76.3675	197.378	170.101	206.176	358.87	115.378	0	231.479	0	151.348	237.027	507.208	254.882	185.279	134.107	76.3675	213.306	152.95	432.607	313.005	216.901	126.503
TcCLB.509187.10	37	28	9	0	0	0	0	0	0	0	348.263	313.005	184.424	322.216	255.834	56.9367	315.044	166.788	128.769	0	132.575	88.7727	190.433	293.855	137.19	196.506	159.412	149.752	219.61	137.19	270.249	364.213	81.5149	0	231.479	0	151.348	237.027	318.111	232.401	315.044	152.95	43.6649	217.802	149.752	449.735	295.852	55.2144	0
TcCLB.509513.10	37	28	9	0	0	0	0	0	0	0	394.615	269.28	184.424	356.74	225.975	132.575	276.089	145.787	174.274	0	116.841	73.8361	201.761	313.005	175.952	187.85	257.74	92.8177	227.805	127.257	188.71	277.066	81.5149	0	267.345	0	133.34	237.027	503.623	232.401	304.893	110.304	59.2605	217.802	153.753	401.235	305.903	49.6022	0
TcCLB.509771.10	37	28	9	0	0	0	0	0	0	0	355.677	328.406	52.3832	237.027	255.834	0	355.677	259.652	116.841	47.958	171.766	119.787	284.926	331.515	131.81	196.506	259.652	91.4627	234.248	178.48	175.112	308.94	103.894	0	213.306	0	151.348	225.975	510.8	200.882	238.886	116.109	33.539	225.975	162.676	467.084	264.451	252.034	0
TcCLB.509821.20	37	28	9	0	0	0	0	0	0	0	348.263	395.716	122.757	276.089	225.975	44.1942	298.856	145.787	134.107	0	159.412	76.3675	216.901	243.555	125.751	149.752	172.601	122.012	299.859	105.307	170.101	235.173	63.4009	0	282.954	0	152.148	237.027	448.587	232.401	315.044	152.95	50.1543	174.274	114.648	474.084	324.275	41.0507	0
TcCLB.510111.20	37	28	9	0	0	0	0	0	0	0	394.615	379.312	49.0521	279.024	255.834	0	332.554	224.15	169.271	78.9272	177.636	136.417	272.191	349.319	186.134	166.788	259.652	113.92	268.312	191.297	225.062	310.97	115.378	0	238.886	0	137.964	235.173	566.938	248.254	0	133.34	44.7256	186.134	125	461.277	363.142	274.138	429.209
TcCLB.510469.30	37	28	9	0	0	0	0	0	0	0	394.615	231.479	40.5343	63.4009	179.325	236.099	148.957	307.927	113.92	250.142	97.6121	76.3675	266.379	322.216	94.1793	168.442	147.369	194.764	276.089	164.317	143.425	291.863	94.8626	0	125	0	115.378	160.226	366.357	223.24	241.684	97.6121	147.369	197.378	98.3036	438.292	202.642	279.024	384.754
TcCLB.510625.210	37	28	9	0	0	0	0	0	0	0	305.903	268.312	50.7085	143.425	178.48	202.642	163.496	170.101	105.307	250.142	85.4481	76.3675	253.931	322.216	94.1793	168.442	170.933	156.978	276.089	138.74	161.858	291.863	130.287	0	137.964	0	115.378	200.882	386.938	264.451	241.684	105.307	147.369	197.378	123.503	426.948	216.901	295.852	384.754
TcCLB.510927.20	37	28	9	0	0	0	0	0	0	0	333.594	330.477	119.787	341.951	255.834	0	335.676	226.89	169.271	47.414	109.586	88.7727	263.489	345.102	124.251	187.85	280.987	106.727	244.492	112.469	186.134	310.97	122.012	0	234.248	0	137.964	222.331	612.213	254.882	0	133.34	174.274	252.982	161.041	356.74	382.574	331.515	589.431
TcCLB.511391.100060	37	28	9	0	0	0	0	0	0	0	394.615	384.754	71.3334	200.882	255.834	0	344.051	202.642	127.257	244.492	106.727	85.4481	260.61	33.0564	144.211	166.788	197.378	140.296	200.882	54.6442	186.134	310.97	106.727	0	180.171	0	155.363	181.019	425.819	225.062	229.64	90.1144	77.6439	216	160.226	322.216	214.203	276.089	210.623
TcCLB.511667.80	37	28	9	0	0	0	0	0	0	0	337.763	305.903	103.894	261.568	255.834	0	156.978	203.523	146.577	81.5149	161.858	126.503	272.191	349.319	178.48	134.107	248.254	80.8653	299.859	54.6442	256.786	293.855	115.378	0	257.74	0	137.964	211.516	627.561	248.254	0	133.34	30.6789	141.858	151.348	374.977	340.902	331.515	589.431
TcCLB.511797.210	37	28	9	0	0	0	0	0	0	0	394.615	300.864	81.5149	121.269	206.176	186.991	229.64	271.22	130.287	250.142	153.753	153.753	205.291	295.852	187.85	170.101	221.422	225.062	94.8626	161.041	161.858	256.786	130.287	0	157.788	0	151.348	211.516	297.853	211.516	273.164	161.041	64.6009	116.109	144.999	361.004	125	305.903	307.927
TcCLB.504389.20001	37	27	10	0	0	0	0	0	0	0	362.073	367.431	114.648	226.89	208.84	0	287.892	166.788	105.307	0	133.34	165.139	187.85	283.939	148.957	103.189	216.901	133.34	121.269	178.48	206.176	281.97	90.7877	0	270.249	0	123.503	235.173	485.828	254.882	289.875	115.378	105.307	264.451	155.363	379.312	237.956	181.869	414.584
TcCLB.506723.20	37	27	10	0	0	0	0	0	0	0	353.553	324.275	94.1793	477.597	237.956	760.269	326.338	0	184.424	165.963	160.226	58.6767	220.516	260.61	116.841	158.599	405.668	0	120.527	149.752	204.406	0	180.171	0	199.128	227.805	165.139	182.719	181.019	266.379	161.858	215.101	0	190.433	260.61	271.22	207.951	231.479	478.77
TcCLB.507869.20	37	26	11	0	0	0	0	0	0	0	368.506	379.312	108.153	688.877	160.226	193.028	564.457	0	104.599	230.559	96.2341	108.869	207.063	298.856	103.894	158.599	575.651	0	180.171	156.978	203.523	0	181.869	0	263.489	164.317	134.876	213.306	210.623	300.864	190.433	187.85	0	131.81	276.089	247.312	210.623	218.706	390.222
TcCLB.421461.20001	37	25	12	0	0	0	0	0	0	152.148	206.176	166.788	44.1942	155.363	251.087	217.802	268.312	0	144.999	159.412	177.636	174.274	208.84	110.304	152.148	81.5149	138.74	215.101	131.81	191.297	225.062	207.951	90.7877	0	194.764	0	152.148	235.173	341.951	235.173	203.523	146.577	126.503	137.19	108.153	460.118	103.894	331.515	386.938
TcCLB.508903.10	37	25	12	0	0	0	0	0	0	0	0	0	122.757	0	261.568	172.601	610.94	0	137.19	116.109	139.517	123.503	211.516	308.94	116.841	158.599	623.712	0	163.496	172.601	204.406	0	180.171	0	249.197	325.306	165.139	122.757	200.882	241.684	175.112	215.101	0	120.527	241.684	255.834	181.019	221.422	447.439
TcCLB.510847.10	37	24	13	0	0	0	0	0	0	0	0	0	0	242.619	237.956	892.523	394.615	0	108.869	237.027	155.363	67.6335	286.902	265.415	105.307	158.599	575.651	0	161.041	134.876	216	0	181.869	0	263.489	68.8595	198.252	237.027	160.226	300.864	179.325	212.41	0	157.788	171.766	237.956	191.297	231.479	292.859
TcCLB.506139.120	36	31	5	0	0	0	0	0	0	0	314.024	324.275	155.363	87.4378	203.523	189.571	77.6439	0	174.274	0	121.269	43.1378	289.875	141.858	191.297	186.991	282.954	0	171.766	125.751	206.176	108.869	192.161	97.6121	220.516	237.956	180.171	177.636	208.84	432.607	111.024	94.8626	56.3607	166.788	145.787	266.379	272.191	0	0
TcCLB.506965.170	36	31	5	0	0	0	0	0	0	0	356.74	384.754	157.788	84.7883	223.24	230.559	114.648	0	187.85	0	96.9223	95.5475	296.852	234.248	165.139	272.191	243.555	113.92	152.95	185.279	226.89	0	168.442	109.586	263.489	187.85	215.101	187.85	213.306	397.92	137.19	94.8626	56.3607	197.378	116.109	277.066	300.864	0	0
TcCLB.507185.40	36	31	5	0	0	0	0	0	0	0	368.506	300.864	90.1144	106.016	130.287	201.761	116.109	0	144.999	0	100.388	69.4752	207.063	198.252	191.297	272.191	261.568	0	174.274	101.785	256.786	130.287	225.062	103.894	234.248	130.287	217.802	190.433	200.882	304.893	211.516	147.369	175.112	139.517	186.991	317.088	150.55	0	0
TcCLB.507237.10	36	31	5	0	0	0	0	0	0	0	394.615	313.005	157.788	71.9564	223.24	258.696	105.307	0	182.719	0	96.9223	95.5475	296.852	234.248	145.787	221.422	256.786	113.92	209.731	125.751	252.982	0	168.442	109.586	252.982	187.85	215.101	187.85	213.306	397.92	137.19	94.8626	56.3607	197.378	124.251	277.066	300.864	0	0
TcCLB.509755.10	36	31	5	0	0	0	0	0	0	0	379.312	319.136	153.753	87.4378	207.063	189.571	77.6439	0	174.274	0	122.012	54.0759	289.875	141.858	210.623	272.191	282.954	0	171.766	125.751	229.64	108.869	192.161	119.048	325.306	237.956	180.171	206.176	208.84	432.607	111.024	94.8626	56.3607	203.523	145.787	225.062	272.191	0	0
TcCLB.510363.310	36	31	5	0	0	0	0	0	0	0	0	0	134.876	101.785	251.087	228.722	123.503	0	193.028	0	152.95	0	266.379	226.89	169.271	226.89	282.954	0	175.112	119.787	272.191	134.876	219.61	148.957	310.97	220.516	217.802	189.571	202.642	421.313	84.7883	101.785	83.4738	55.2144	34.0239	213.306	279.024	185.279	244.492
TcCLB.511173.1000190	36	31	5	0	0	0	0	0	0	0	349.319	285.913	113.194	122.757	203.523	213.306	88.1044	0	187.85	0	99.6914	47.414	203.523	141.076	161.858	251.087	282.954	42.6128	175.112	110.304	262.528	0	181.019	97.6121	225.062	175.112	180.171	187.85	177.636	432.607	127.257	90.7877	56.3607	203.523	105.307	225.062	302.876	0	0
TcCLB.511173.440	36	31	5	0	0	0	0	0	0	0	355.677	363.142	131.048	122.757	181.869	213.306	88.1044	0	215.101	0	129.527	88.1044	203.523	317.088	148.162	221.422	253.931	137.964	185.279	137.19	248.254	0	181.019	97.6121	241.684	181.869	180.171	187.85	177.636	432.607	127.257	90.7877	56.3607	203.523	105.307	225.062	302.876	0	0
TcCLB.506911.30	36	30	6	0	0	0	0	0	0	0	278.045	370.659	157.788	216	207.063	275.113	175.952	153.753	174.274	0	115.378	213.306	263.489	0	225.062	221.422	249.197	0	220.516	152.95	237.027	134.876	161.858	117.576	260.61	168.442	217.802	237.027	202.642	432.607	163.496	125	129.527	120.527	205.291	230.559	206.176	0	0
TcCLB.508149.60	36	30	6	0	0	0	0	0	0	0	364.213	350.376	120.527	38.9984	205.291	171.766	96.2341	0	159.412	0	115.378	118.311	98.9967	56.9367	225.062	272.191	282.954	120.527	174.274	134.876	222.331	134.876	243.555	93.4977	255.834	184.424	186.134	225.975	183.571	432.607	131.81	38.9984	136.417	160.226	188.71	251.087	147.369	0	0
TcCLB.463323.10	36	29	7	0	0	0	0	0	0	0	352.493	306.914	102.486	200.882	251.087	0	240.75	252.034	151.348	37.4824	144.999	82.8191	272.191	284.926	124.251	121.269	206.176	150.55	210.623	153.753	243.555	336.719	88.1044	0	213.306	0	103.189	221.422	394.615	245.431	194.764	124.251	86.1097	264.451	128.769	298.856	338.809	262.528	0
TcCLB.464253.20001	36	29	7	0	0	0	0	0	0	58.0948	306.914	318.111	56.9367	221.422	251.087	0	272.191	187.85	167.614	0	93.4977	121.269	295.852	354.615	144.999	131.048	190.433	89.4427	254.882	137.19	226.89	306.914	98.3036	0	279.024	0	134.107	235.173	454.34	223.24	237.956	103.894	116.109	264.451	162.676	281.97	271.22	0	0
TcCLB.505231.20	36	29	7	0	0	0	0	0	0	0	385.846	279.024	49.0521	320.161	199.128	0	200.004	142.641	130.287	38.4908	123.503	73.8361	246.371	322.216	156.978	187.85	196.506	134.107	252.034	29.281	206.176	257.74	122.012	0	252.034	0	151.348	235.173	431.474	272.191	125.751	103.894	108.869	264.451	137.19	216.901	328.406	242.619	0
TcCLB.506241.30	36	29	7	0	0	0	0	0	0	0	340.902	376.06	102.486	193.028	251.087	0	286.902	231.479	154.557	35.9865	85.4481	82.8191	253.931	298.856	124.251	187.85	213.306	138.74	256.786	197.378	243.555	306.914	90.7877	0	213.306	0	105.307	170.101	467.084	259.652	192.161	124.251	86.1097	264.451	131.81	304.893	242.619	258.696	0
TcCLB.506331.90	36	29	7	0	0	0	0	0	0	0	364.213	380.399	51.2647	237.027	173.437	0	214.203	183.571	135.646	0	125.751	140.296	230.559	230.559	143.425	82.1661	267.345	51.823	238.886	226.89	227.805	181.869	86.1097	0	267.345	0	106.016	155.363	208.84	252.982	181.869	73.8361	73.8361	238.886	175.112	174.274	330.477	219.61	0
TcCLB.506455.30	36	29	7	0	0	0	0	0	0	0	389.127	310.97	102.486	219.61	251.087	0	277.066	235.173	151.348	52.9455	123.503	93.4977	246.371	298.856	124.251	141.858	221.422	171.766	266.379	86.1097	243.555	289.875	122.012	0	255.834	0	123.503	206.176	471.747	216	170.933	151.348	31.6228	264.451	145.787	281.97	246.371	248.254	0
TcCLB.506955.100050	36	29	7	0	0	0	0	0	0	0	313.005	246.371	73.2078	0	199.128	95.5475	114.648	199.128	215.101	0	148.162	94.8626	208.84	215.101	153.753	221.422	139.517	153.753	181.019	114.648	254.882	111.024	265.415	98.9967	0	131.048	217.802	196.506	116.109	334.634	194.764	64.6009	0	156.978	129.527	145.787	232.401	164.317	0
TcCLB.507085.100080	36	29	7	0	0	0	0	0	0	0	394.615	234.248	157.788	106.727	200.004	135.646	116.841	0	159.412	0	118.311	63.4009	280.005	103.894	191.297	272.191	0	96.2341	185.279	132.575	183.571	110.304	116.109	56.3607	287.892	147.369	213.306	225.975	170.933	377.143	141.076	146.577	114.648	150.55	190.433	274.138	225.062	0	0
TcCLB.508221.1000530	36	29	7	0	0	0	0	0	0	0	379.312	278.045	148.957	121.269	0	193.895	115.378	0	195.634	0	143.425	242.619	315.044	220.516	169.271	272.191	181.019	83.4738	174.274	174.274	272.191	125.751	233.324	132.575	282.954	117.576	163.496	217.802	227.805	432.607	134.107	81.5149	136.417	201.761	129.527	279.024	281.97	35.0006	0
TcCLB.508577.100010	36	29	7	0	0	0	0	0	0	0	394.615	370.659	106.016	219.61	198.252	0	170.101	133.34	116.841	0	114.648	174.274	219.61	72.5812	46.8722	81.5149	251.087	60.434	162.676	197.378	155.363	263.489	86.1097	0	237.956	0	106.016	155.363	205.291	243.555	185.279	116.109	78.2847	252.982	175.112	117.576	214.203	260.61	0
TcCLB.508607.50	36	29	7	0	0	0	0	0	0	258.696	394.615	289.875	139.517	155.363	209.731	0	229.64	131.048	123.503	0	54.6442	104.599	236.099	174.274	90.7877	125.751	184.424	46.3324	299.859	77.6439	137.964	216	44.1942	0	268.312	0	180.171	156.17	241.684	206.176	192.161	121.269	68.2456	193.028	180.171	144.999	189.571	0	0
TcCLB.508745.30	36	29	7	0	0	0	0	0	0	0	394.615	350.376	103.894	111.746	58.0948	243.555	111.024	272.191	222.331	0	138.74	242.619	295.852	237.956	167.614	251.087	282.954	0	154.557	148.162	237.027	130.287	178.48	134.876	263.489	141.076	167.614	237.027	174.274	432.607	131.81	123.503	139.517	160.226	202.642	256.786	166.788	0	0
TcCLB.510095.20	36	29	7	0	0	0	0	0	0	0	291.863	343	113.194	268.312	156.17	0	214.203	181.019	135.646	0	132.575	81.5149	211.516	230.559	173.437	122.757	227.805	122.757	238.886	199.128	200.882	225.062	45.7947	0	192.161	0	119.048	164.317	261.568	249.197	196.506	98.3036	94.8626	124.251	156.17	223.24	346.155	210.623	0
TcCLB.510359.430	36	29	7	0	0	0	0	0	0	0	394.615	294.853	31.6228	113.194	166.788	170.101	86.1097	188.71	215.101	0	175.952	0	313.005	112.469	225.062	272.191	270.249	187.85	188.71	117.576	248.254	134.876	185.279	111.746	252.982	165.963	177.636	216.901	206.176	432.607	157.788	127.257	68.2456	201.761	243.555	286.902	231.479	0	0
TcCLB.510403.30	36	29	7	0	0	0	0	0	0	0	394.615	292.859	65.2037	226.89	251.087	33.0564	286.902	267.345	151.348	73.8361	107.439	84.7883	252.982	289.875	124.251	187.85	200.004	128.769	244.492	153.753	274.138	287.892	93.4977	0	232.401	0	151.348	187.85	411.233	228.722	195.634	88.7727	0	252.982	145.787	313.005	293.855	258.696	0
TcCLB.506683.190	36	28	8	0	0	0	0	0	0	0	310.97	370.659	78.9272	306.914	255.834	0	335.676	247.312	152.148	75.0983	86.7729	128.769	212.41	327.371	159.412	156.978	196.506	124.251	244.492	62.2085	199.128	246.371	108.153	0	237.956	0	151.348	178.48	430.341	154.557	233.324	123.503	65.8084	193.028	151.348	453.188	237.956	0	0
TcCLB.507691.100040	36	28	8	0	0	0	0	0	0	0	343	350.376	50.1543	334.634	255.834	0	315.044	272.191	160.226	102.486	92.8177	227.805	237.956	217.802	134.107	160.226	259.652	113.194	188.71	66.4149	149.752	313.005	70.0928	0	207.063	0	151.348	186.991	494.106	220.516	175.112	122.012	41.5692	181.019	145.787	416.823	286.902	0	0
TcCLB.508139.240	36	28	8	0	0	0	0	0	0	0	391.319	384.754	84.1302	303.884	237.956	0	279.024	150.55	167.614	0	88.1044	132.575	295.852	313.005	156.17	117.576	233.324	79.5715	285.913	67.0233	202.642	296.852	92.1394	0	240.75	0	130.287	252.982	401.235	162.676	233.324	164.317	57.5148	252.982	116.109	374.977	322.216	305.903	0
TcCLB.508139.250	36	28	8	0	0	0	0	0	0	0	391.319	384.754	84.1302	303.884	237.956	0	279.024	150.55	167.614	0	88.1044	132.575	295.852	313.005	156.17	117.576	233.324	79.5715	285.913	67.0233	202.642	296.852	92.1394	0	240.75	0	130.287	252.982	401.235	162.676	233.324	164.317	57.5148	252.982	116.109	374.977	322.216	305.903	0
TcCLB.508143.50	36	28	8	0	0	0	0	0	0	0	394.615	284.926	90.1144	227.805	175.112	40.5343	348.263	70.7122	166.788	236.099	177.636	234.248	235.173	255.834	166.788	187.85	133.34	94.1793	271.22	155.363	182.719	169.271	49.6022	0	164.317	0	136.417	209.731	130.287	135.646	259.652	164.317	135.646	0	102.486	482.295	340.902	299.859	369.582
TcCLB.508221.790	36	28	8	0	0	0	0	0	0	0	394.615	343	94.8626	101.785	228.722	275.113	127.257	250.142	149.752	0	98.9967	170.933	252.982	0	225.062	239.818	282.954	0	175.112	130.287	272.191	108.153	186.991	103.894	249.197	154.557	186.134	217.802	227.805	374.977	163.496	146.577	132.575	142.641	205.291	266.379	210.623	0	0
TcCLB.508451.60	36	28	8	0	0	0	0	0	0	0	374.977	370.659	135.646	299.859	207.063	47.414	300.864	229.64	167.614	0	140.296	70.0928	238.886	356.74	140.296	138.74	280.987	143.425	299.859	163.496	179.325	293.855	109.586	0	232.401	0	151.348	210.623	463.597	254.882	199.128	116.109	0	225.975	162.676	400.129	326.338	270.249	252.034
TcCLB.508485.10	36	28	8	0	0	0	0	0	0	0	313.005	219.61	125.751	218.706	255.834	0	315.044	137.19	131.81	0	111.024	70.7122	194.764	262.528	125.751	128.012	161.041	89.4427	236.099	101.785	141.858	277.066	105.307	0	270.249	0	148.162	237.027	465.92	254.882	301.869	123.503	63.4009	217.802	153.753	464.758	305.903	54.6442	0
TcCLB.509077.20	36	28	8	0	0	0	0	0	0	0	362.073	370.659	97.6121	299.859	207.063	0	297.853	229.64	167.614	0	140.296	68.8595	228.722	254.882	117.576	129.527	271.22	143.425	268.312	149.752	216.901	329.441	122.012	0	232.401	0	137.964	188.71	554.569	269.28	162.676	108.869	68.8595	225.975	162.676	396.817	278.045	252.034	0
TcCLB.509875.80	36	28	8	0	0	0	0	0	0	0	265.415	384.754	105.307	352.493	221.422	0	291.863	190.433	136.417	0	138.74	66.4149	223.24	327.371	125.751	144.211	192.161	86.1097	299.859	140.296	126.503	252.982	89.4427	0	237.956	0	148.162	237.027	573.157	254.882	315.044	116.841	61.6151	217.802	104.599	445.146	269.28	35.9865	0
TcCLB.509905.1000200	36	28	8	0	0	0	0	0	0	0	355.677	251.087	121.269	253.931	255.834	0	316.065	116.841	167.614	0	135.646	121.269	210.623	303.884	147.369	163.496	248.254	122.012	268.312	170.101	179.325	287.892	78.2847	0	224.15	0	137.964	209.731	441.715	242.619	216	123.503	82.8191	213.306	158.599	419.066	326.338	281.97	197.378
TcCLB.509921.20	36	28	8	0	0	0	0	0	0	0	368.506	281.97	141.858	172.601	131.048	0	280.987	214.203	167.614	28.8199	105.307	139.517	260.61	293.855	101.086	187.85	227.805	88.7727	181.869	98.9967	155.363	302.876	91.4627	0	260.61	0	152.95	164.317	280.005	252.982	137.964	152.95	61.6151	219.61	103.894	236.099	363.142	36.4829	0
TcCLB.510361.180	36	28	8	0	0	0	0	0	0	0	319.136	328.406	133.34	113.92	287.892	222.331	132.575	59.2605	217.802	0	131.81	92.1394	242.619	0	181.869	236.099	234.248	0	222.331	84.7883	264.451	125.751	167.614	124.251	227.805	149.752	217.802	208.84	109.586	318.111	141.076	146.577	138.74	91.4627	216	239.818	201.761	0	0
TcCLB.511171.40	36	28	8	0	0	0	0	0	0	0	349.319	350.376	62.2085	205.291	92.1394	186.991	348.263	51.823	144.999	237.956	157.788	221.422	268.312	259.652	166.788	158.599	218.706	225.062	229.64	214.203	225.062	257.74	118.311	0	240.75	0	151.348	157.788	332.554	254.882	301.869	156.978	177.636	245.431	113.92	392.416	209.731	263.489	0
TcCLB.511219.40	36	28	8	0	0	0	0	0	0	0	353.553	266.379	99.6914	237.956	240.75	0	277.066	144.211	167.614	0	104.599	101.785	211.516	251.087	134.107	196.506	222.331	123.503	268.312	207.063	185.279	341.951	105.307	0	234.248	0	134.107	210.623	458.961	252.982	287.892	116.841	67.6335	264.451	137.19	491.736	346.155	199.128	134.876
[truncated: 2,649 more rows]
[truncated: 6 more columns]
